# Supplementary material for: Targeted Resequencing of the Coding Sequence of 38 Genes Near Breast Cancer GWAS Loci in a Large Case–Control Study
Source: Oxford University Press journal article supplement (doi:10.1158/1055-9965.epi-18-0298), 2019-01-14
Supplement: 10559965epi180298-sup-198832_1_supp_4771440_pf95jn.xlsx [file 10559965epi180298-sup-198832_1_supp_4771440_pf95jn.xlsx]

## Sheet: TableS1
Table S1. Amplicon designs for 38 genes near BC GWAS loci.
Gene	Chr	Start	End	Assay	Len	GC	Forward Primer	Reverse Primer	Amplicon
DCLRE1B	1	114448123	114448322	DCLRE1B_1	200	62	TTTTATCGGGACGCCGTTGT	CACGGTGTGGTCCGAGTG	TTTTATCGGGACGCCGTTGTGGAAGCCTCACGCAGGAGCCCTGCCCCCGTGGAGAAGATCCCACTGGTGACTCCAACCCTACCACCATGAATGGGGTCCTGATCCCCCATACGCCCATCGCAGTGGACTTCTGGAGCCTGCGCCGGGCTGGCACCGCACGTCTCTTCTTCTTGTCTCACATGCACTCGGACCACACCGTG
DCLRE1B	1	114448238	114448437	DCLRE1B_2	200	63	CATCGCAGTGGACTTCTGG	TGCCTGGACCAGCTCT	CATCGCAGTGGACTTCTGGAGCCTGCGCCGGGCTGGCACCGCACGTCTCTTCTTCTTGTCTCACATGCACTCGGACCACACCGTGGGCCTGTCTAGCACCTGGGCCCGGCCCCTCTACTGCTCCCCAATTACAGCCCACCTCTTGCATCGTCACCTACAGGTATGGGGCTGGAGTCGGTCTCCGAGAGCTGGTCCAGGCA
DCLRE1B	1	114449565	114449747	DCLRE1B_3	183	49	GGAGGTAACGGAGAGGAGTCA	GAAACATGACAGAACCAGGACAG	GGAGGTAACGGAGAGGAGTCAGTGGTCACTGGGATGACTAACTGTTTTCTCAGGTATCTAAGCAATGGATCCAAGCCCTGGAGGTTGGTGAGAGCCATGTATTACCCCTAGATGAAATTGGACAAGAGACCATGACCGTAACCCTCCTCGATGCCAATCACTGTCCTGGTTCTGTCATGTTTC
DCLRE1B	1	114449637	114449824	DCLRE1B_4	188	48	AAGCCCTGGAGGTTGGTGA	TCTAGTCTGGAGAAGTCACTGGG	AAGCCCTGGAGGTTGGTGAGAGCCATGTATTACCCCTAGATGAAATTGGACAAGAGACCATGACCGTAACCCTCCTCGATGCCAATCACTGTCCTGGTTCTGTCATGTTTCTCTTTGAAGGATATTTTGGAACCATCCTCTACACAGGTGGGCCTCTCAAGGAATCCCAGTGACTTCTCCAGACTAGA
DCLRE1B	1	114450552	114450751	DCLRE1B_5	200	47	TCTATTGTTGGAGGTAGGAGAGG	TGTCGGGAAGGAAGAACCAG	TCTATTGTTGGAGGTAGGAGAGGCTTGTCTTCTATTCTTTTGTCTCTGACCTTCTGCCCCCATGTACATATTCCTCCAGGTGATTTTCGATACACACCATCCATGCTAAAGGAGCCAGCCCTGACACTGGGGAAACAGATCCATACTTTATACCTAGACAACACCAATTGCAATCCAGCCCTGGTTCTTCCTTCCCGACA
DCLRE1B	1	114450643	114450842	DCLRE1B_6	200	47	ACACACCATCCATGCTAAAGGAG	TGACAGGAAACTGAAAGGAAACA	ACACACCATCCATGCTAAAGGAGCCAGCCCTGACACTGGGGAAACAGATCCATACTTTATACCTAGACAACACCAATTGCAATCCAGCCCTGGTTCTTCCTTCCCGACAAGAAGCTGCCCACCAGATTGTCCAGCTCATTCGAAAACACCCACAACATAACATAAAGATTGGTGAGTTGTTTCCTTTCAGTTTCCTGTCA
DCLRE1B	1	114453694	114453888	DCLRE1B_7	195	49	TCCAATAGCTTAATTTTCTTCCTTCTCT	TTCTCCTCCACTGTGAACACATC	TCCAATAGCTTAATTTTCTTCCTTCTCTTACTTTCCCCAATACATTGAACATTATTTAGGACTCTACAGCCTGGGAAAGGAATCACTGCTGGAGCAGCTGGCCCTGGAGTTTCAGACCTGGGTGGTATTGAGTCCTCGGCGCCTGGAGTTGGTACAGCTACTGGGCCTGGCAGATGTGTTCACAGTGGAGGAGAA
DCLRE1B	1	114453801	114453981	DCLRE1B_8	181	55	AGTTTCAGACCTGGGTGGTATTG	GGAAGGATAGCAATCGTAGGGTG	AGTTTCAGACCTGGGTGGTATTGAGTCCTCGGCGCCTGGAGTTGGTACAGCTACTGGGCCTGGCAGATGTGTTCACAGTGGAGGAGAAGGCTGGCCGCATCCATGCAGTAGACCATATGGAGATCTGCCATTCCAACATGCTGCGTTGGAACCAGACCCACCCTACGATTGCTATCCTTCC
DCLRE1B	1	114453872	114454061	DCLRE1B_9	190	53	TTCACAGTGGAGGAGAAGGC	GAAGCTCGGAGTAAGAGGAATGG	TTCACAGTGGAGGAGAAGGCTGGCCGCATCCATGCAGTAGACCATATGGAGATCTGCCATTCCAACATGCTGCGTTGGAACCAGACCCACCCTACGATTGCTATCCTTCCCACAAGCCGAAAAATCCACAGCTCCCACCCTGATATCCACGTCATCCCTTACTCTGACCATTCCTCTTACTCCGAGCTTC
DCLRE1B	1	114453962	114454146	DCLRE1B_10	185	55	CCTACGATTGCTATCCTTCCCAC	CTCAGACTGTCCTGAAAGCCTCC	CCTACGATTGCTATCCTTCCCACAAGCCGAAAAATCCACAGCTCCCACCCTGATATCCACGTCATCCCTTACTCTGACCATTCCTCTTACTCCGAGCTTCGTGCCTTTGTCGCAGCACTGAAGCCTTGCCAGGTGGTGCCCATTGTAAGTCGGCGGCCCTGTGGAGGCTTTCAGGACAGTCTGAG
DCLRE1B	1	114454091	114454284	DCLRE1B_11	194	54	CAGGTGGTGCCCATTGTAAGT	GGGGATTCAAACACAACACCTTG	CAGGTGGTGCCCATTGTAAGTCGGCGGCCCTGTGGAGGCTTTCAGGACAGTCTGAGCCCCAGGATCTCCGTGCCCCTGATTCCGGACTCTGTACAGCAATACATGAGTTCTTCCTCTAGAAAACCAAGCCTTCTCTGGCTGTTAGAAAGGAGGCTAAAGAGGCCGAGAACCCAAGGTGTTGTGTTTGAATCCCC
DCLRE1B	1	114454215	114454414	DCLRE1B_12	200	50	CAAGCCTTCTCTGGCTGTTAGAA	CAACTGCTTCTTGATCCGCAAAG	CAAGCCTTCTCTGGCTGTTAGAAAGGAGGCTAAAGAGGCCGAGAACCCAAGGTGTTGTGTTTGAATCCCCTGAGGAAAGTGCTGATCAATCTCAAGCTGACAGAGACTCAAAGAAGGCCAAGAAAGAGAAACTTTCTCCCTGGCCTGCGGACCTTGAAAAGCAGCCTTCCCACCATCCTTTGCGGATCAAGAAGCAGTTG
DCLRE1B	1	114454314	114454501	DCLRE1B_13	188	49	ACAGAGACTCAAAGAAGGCCAAG	CAGTGGGGCCGTCAACAT	ACAGAGACTCAAAGAAGGCCAAGAAAGAGAAACTTTCTCCCTGGCCTGCGGACCTTGAAAAGCAGCCTTCCCACCATCCTTTGCGGATCAAGAAGCAGTTGTTCCCAGATCTCTATAGCAAAGAATGGAACAAGGCAGTGCCTTTCTGTGAGTCTCAAAAGAGGGTGACTATGTTGACGGCCCCACTG
DCLRE1B	1	114454461	114454658	DCLRE1B_14	198	50	GTGAGTCTCAAAAGAGGGTGACT	GAGAACCATGGCCCATCCAG	GTGAGTCTCAAAAGAGGGTGACTATGTTGACGGCCCCACTGGGATTTTCAGTGCACTTAAGGTCTACAGATGAGGAGTTTATTTCTCAAAAAACCAGGGAGGAAATTGGTTTAGGGTCCCCCTTGGTACCCATGGGAGATGATGATGGAGGTCCAGAAGCCACAGGGAATCAGAGTGCCTGGATGGGCCATGGTTCTC
DCLRE1B	1	114454563	114454762	DCLRE1B_15	200	53	AAATTGGTTTAGGGTCCCCCTTG	ATACCCTGCCTGGAAAAAGTTCA	AAATTGGTTTAGGGTCCCCCTTGGTACCCATGGGAGATGATGATGGAGGTCCAGAAGCCACAGGGAATCAGAGTGCCTGGATGGGCCATGGTTCTCCCCTGTCCCACAGCAGCAAGGGCACCCCTCTTCTAGCTACTGAATTCAGGGGTCTAGCACTCAAATATCTTCTGACTCCAGTGAACTTTTTCCAGGCAGGGTAT
DCLRE1B	1	114454650	114454849	DCLRE1B_16	200	48	ATGGTTCTCCCCTGTCCCA	GTGGGCTCAATGTTGTCATTCTG	ATGGTTCTCCCCTGTCCCACAGCAGCAAGGGCACCCCTCTTCTAGCTACTGAATTCAGGGGTCTAGCACTCAAATATCTTCTGACTCCAGTGAACTTTTTCCAGGCAGGGTATTCTTCCAGGAGATTTGACCAGCAAGTGGAAAAATACCATAAACCCTGCTGAAGACAGGAGAGTACAGAATGACAACATTGAGCCCAC
RNF115	1	145611163	145611342	RNF115_1	180	72	GACTGCAGCTCGGGAGGTA	CCGGTAGTTTGGGGCTGAC	gactgcagctcgggaggtagcggcctggcgagggacgggccggctgccctctcggacggccgcggcggagggcaaaaatggcggaggcttcggcggccggggcggACTCGGGCGCCGCTGTAGCCGCCCACCGGTTTTTCTGCCACTTTTGCAAGGGCGAGGTCAGCCCCAAACTACCGG
RNF115	1	145611279	145611478	RNF115_2	200	56	GCTGTAGCCGCCCACC	TTAGAAGTGGGCAGCAGGTATT	GCTGTAGCCGCCCACCGGTTTTTCTGCCACTTTTGCAAGGGCGAGGTCAGCCCCAAACTACCGGTAAGAGCGCTGTGTTCTCTATACTTGGGAACCTCATAGATTCCTGGCCCCGATTTCCCGGAACTGGGTCTGGAGCTTTCTGCACATCATTGACTCGCCCGACATCGGTCTGCCGAATACCTGCTGCCCACTTCTAA
RNF115	1	145646055	145646244	RNF115_3	190	33	ACAGATACCACGTAGCTTTCTAATGA	ACTCAGTCCATGCTGAGAGAAAA	ACAGATACCACGTAGCTTTCTAATGAAAAAGTTTTATTTGTTTCTTCCTTTCTTTTATAGGAATATATATGTCCCAGATGTGAATCAGGCTTTATTGAAGAAGTGACAGATGATTCCAGGTATTGTACAAGCTCATGAATAAATCAGACATTCTATTATCAAAACTATTTTCTCTCAGCATGGACTGAGT
RNF115	1	145650429	145650627	RNF115_4	199	42	GGAGGGGAGCTTGTTCCTG	TTGTGCCACACTGGAAAGTTAGT	GGAGGGGAGCTTGTTCCTGGGAATAGAATCACCACTCATTCCTTTTCTCTTTAGTTTTTTAGGTGGTGGCGGCAGTCGGATAGACAATACCACAACAACACATTTTGCAGAGGTAAGTTTTCCTTTAGCTGTAGGAATTCTTTAAGAAGTGGTTAGGTGTTAAAATCATGGCAGATACTAACTTTCCAGTGTGGCACAA
RNF115	1	145663096	145663292	RNF115_5	197	41	AAACAATCCAGGTGTTTATTGATTGA	GGTCTTGCTCCCCAGAAGTC	aaacaatccaggtgtttattgaTTGATTTTTCTAACATGTGACTTATTTCTGGTCTTTACTAGCTTTGGGGCCATTTGGATCACACGATGTTTTTTCAAGATTTTAGACCCTTTCTAAGTAGCAGTCCACTGGACCAAGATAATAGAGCCAATGAAAGGGGTCACCAGACTCACACTGACTTCTGGGGAGCAAGACC
RNF115	1	145663172	145663368	RNF115_6	197	48	TGGATCACACGATGTTTTTTCAAG	CCCTTCAATAGCTGGAGATCTGTC	TGGATCACACGATGTTTTTTCAAGATTTTAGACCCTTTCTAAGTAGCAGTCCACTGGACCAAGATAATAGAGCCAATGAAAGGGGTCACCAGACTCACACTGACTTCTGGGGAGCAAGACCTCCACGGTTGCCATTGGGTCGGAGATACAGATCTCGAGGAAGTTCTCGTCCTGACAGATCTCCAGCTATTGAAGGG
RNF115	1	145663302	145663481	RNF115_7	180	38	GCCATTGGGTCGGAGATACAG	ATGTCCATCTTGTCCACAAAGGTAA	GCCATTGGGTCGGAGATACAGATCTCGAGGAAGTTCTCGTCCTGACAGATCTCCAGCTATTGAAGGGTGAGTTGTTTTATTTTAAGTTCTTTTTAAGGTAGTTTCAATGAAGGACAAATTGGTATAATCTAATCTTTATAAGGGTCTCATACTTATTACCTTTGTGGACAAGATGGACAT
RNF115	1	145681971	145682163	RNF115_8	193	35	AGAGTACTTTTCATTAGTCTGTTGTCT	GCACAGAAATGACAGCACCTAAAAT	AGAGTACTTTTCATTAGTCTGTTGTCTTATCTAATTTTTTCTTCTGTAACAGAATACTACAACACATCTTTGCAGGATTCTTTGCAAATTCTGCCATTCCTGGATCTCCACACCCTTTTTCCTGGTAAGTAACTAATTGTTTTCTATCTTACTCTATTGGAGTGACATATTTTAGGTGCTGTCATTTCTGTGC
RNF115	1	145683487	145683681	RNF115_9	195	52	AACAGGATCCCTCTGCCAATTTT	ACTGAACAGACACCCTCAAAAGG	AACAGGATCCCTCTGCCAATTTTTTTCTGTGGTGTAAGGCAGAGCCTGGTCACTCCATCTAATGCTGTCTATCTCATCTCACGTATAGGAGCGGGATGCTGCACTCCAACCCTGGGGACTATGCCTGGGGTCAGACAGGGCTTGATGCCATTGTAACCCAGGTGAGGAGCTGCCTTTTGAGGGTGTCTGTTCAGT
RNF115	1	145684526	145684721	RNF115_10	196	43	CCTCTCCAGGGATATTGCGATG	CCGAGATCAGAAGATGACAGAAT	CCTCTCCAGGGATATTGCGATGTCTGCCACTTCGTCTTTTTCTTTCTCTTTTTTTGTAGCTTTTAGGACAACTGGAAAACACAGGCCCTCCCCCAGCTGACAAGGAAAAGATCACATCTCTTCCAACAGTGACAGTAACTCAGGAACAAGTTGGTAGGTTCATTTTTATACTTATTCTGTCATCTTCTGATCTCGG
RNF115	1	145686892	145687086	RNF115_11	195	42	CGTAGGGTTGGTAGAGACATTGG	CTAGCCACGGCACAATACAACTG	CGTAGGGTTGGTAGAGACATTGGGTTAGTTTTTTCTTCTTTCCTTTTGCCTGTTTACTTTAAAAGGCATTTCCTTCTTCAACAGATATGGGTTTAGAGTGTCCAGTATGCAAAGAAGATTACACAGTTGAAGAGGAAGTCCGGCAGTTACCTTGCAATCACTTCTTTCACAGCAGTTGTATTGTGCCGTGGCTAG
RNF115	1	145686979	145687175	RNF115_12	197	44	TGGGTTTAGAGTGTCCAGTATGC	TGATCTACTTGGATCTCGAGGAACT	TGGGTTTAGAGTGTCCAGTATGCAAAGAAGATTACACAGTTGAAGAGGAAGTCCGGCAGTTACCTTGCAATCACTTCTTTCACAGCAGTTGTATTGTGCCGTGGCTAGAACTGGTGAGTACAGCAAGTCATGGCTTCTTTGGGGGATGATTCAGAGTAAAGGTATAGTTAACAGTTCCTCGAGATCCAAGTAGATCA
RNF115	1	145688039	145688223	RNF115_13	185	46	CAGCTTCTCAGGCCAGGAT	GCTTCAGAAAGTCCATCGGTCAT	CAGCTTCTCAGGCCAGGATCTTCACATAGACTAATATTTTTCTGTTTCAGCATGACACATGTCCTGTATGTAGGAAGAGCTTAAATGGTGAGGACTCTACTCGGCAAAGCCAGAGCACTGAGGCCTCTGCAAGCAACAGATTTAGCAATGACAGTCAGCTACATGACCGATGGACTTTCTGAAGC
RNF115	1	145688095	145688289	RNF115_14	195	45	ACATGTCCTGTATGTAGGAAGAGC	TGTTTTGATACAATTTACAGCTATGGT	ACATGTCCTGTATGTAGGAAGAGCTTAAATGGTGAGGACTCTACTCGGCAAAGCCAGAGCACTGAGGCCTCTGCAAGCAACAGATTTAGCAATGACAGTCAGCTACATGACCGATGGACTTTCTGAAGCTAAAGACCACACCTGAATCAGGGCTGTGGTAATCATCTTACCATAGCTGTAAATTGTATCAAAACA
MDM4	1	204494536	204494733	MDM4_1	198	36	GGTTGCCTTTGTGTGAATGCTAA	ATGATTTACCTGATTGATTTGTCCAG	GGTTGCCTTTGTGTGAATGCTAAATAGGGAATTTTCTGCATTAGAATAGATGTTATAAATTTTTTTTTCTATTTAGTTTTACCAACAGACTGCAGTTTCTTCACTACCAAAATGACATCATTTTCCACCTCTGCTCAGTGTTCAACATCTGACAGTGCTTGCAGGATCTCTCCTGGACAAATCAATCAGGTAAATCAT
MDM4	1	204494650	204494841	MDM4_2	192	36	ACATCATTTTCCACCTCTGCTCA	GTAAGCTTCCTGCCTTGACTTCT	ACATCATTTTCCACCTCTGCTCAGTGTTCAACATCTGACAGTGCTTGCAGGATCTCTCCTGGACAAATCAATCAGGTAAATCATTTTCGGTATTTCTAGTTTTTTGGttttttttttttttaatttttaaaaaGTTTAGCtgtctcatgactgtaatcccagcactttgagaagtcaaggcaggaagcttac
MDM4	1	204495406	204495586	MDM4_3	181	35	TGTTTAAAGAGGTTCTCTTGTTCCAT	TGAGAATTTTATTTGATGGCTTACCTC	TGTTTAAAGAGGTTCTCTTGTTCCATAGTTTCAGAAACCTACTTGAAATGTAAATAGCACATTTATTTTATGTTTATATCAGGTACGACCAAAACTGCCGCTTTTGAAGATTTTGCATGCAGCAGGTGCGCAAGGTGAAATGTTCACTGTTAAAGAGGTAAGCCATCAAATAAAATTCTCA
MDM4	1	204499759	204499950	MDM4_4	192	43	GTGTTTTTGGTAGCAGCTGGACA	TTTACCTTGGGTCTTTCACGGAG	GTGTTTTTGGTAGCAGCTGGACAGATCACAACATGGTATTTTATTCCATGCAGGTCATGCACTATTTAGGTCAGTACATAATGGTGAAGCAACTTTATGATCAGCAGGAGCAGCATATGGTATATTGTGGTGGAGATCTTTTGGGAGAACTACTGGGACGTCAGAGCTTCTCCGTGAAAGACCCAAGGTAAA
MDM4	1	204499801	204499996	MDM4_5	196	45	ATTCCATGCAGGTCATGCACTAT	GTGGCTAGGTATAAGCACCCAAA	ATTCCATGCAGGTCATGCACTATTTAGGTCAGTACATAATGGTGAAGCAACTTTATGATCAGCAGGAGCAGCATATGGTATATTGTGGTGGAGATCTTTTGGGAGAACTACTGGGACGTCAGAGCTTCTCCGTGAAAGACCCAAGGTAAAAACAGTGAGGGCTTGCGTATCTTTTTGGGTGCTTATACCTAGCCAC
MDM4	1	204501250	204501442	MDM4_6	193	39	ACGGCAAACCACTGATATCTTCA	TTTTCCCATCATTTGCCCCCTTG	ACGGCAAACCACTGATATCTTCATAGTGGCATTTGGGGTTGTTAATTTTTTATCTTCTCTCTTTAACAGCCCTCTCTATGATATGCTAAGAAAGAATCTTGTCACTTTAGCCACTGCTACTACAGGTATGTCACATCATATTTCTTCAGTCTGTATCACAGCTTTGAGTTCAAGGGGGCAAATGATGGGAAAA
MDM4	1	204506476	204506656	MDM4_7	181	43	GGTTGTTTGCTGAGGTCCTTTTT	AACAAAAGAAGTCACCGTGTGGT	GGTTGTTTGCTGAGGTCCTTTTTGTGTGGAAAGAATGGTTATTACCAGGGAAGGTTTTCCTTTTGTTTTACTTGCTATCCAGATGCTGCTCAGACTCTCGCTCTCGCACAGGATCACAGTATGGATATTCCAAGTCAAGACCAACTGAAGGTAAAATCACCACACGGTGACTTCTTTTGTT
MDM4	1	204507302	204507490	MDM4_8	189	42	CTACTGCACTGATGGACACCTTT	AAGGTTGGAAGAGGAAGAGAACA	CTACTGCACTGATGGACACCTTTCCCTTCTTTCAGCAAAGTGCAGAGGAAAGTTCCACTTCCAGAAAAAGAACTACAGAAGACGATATCCCCACACTGCCTACCTCAGAGCATAAATGCATACATTCTAGAGAAGGTATGTTTTGGATTAAGGCTATATAGACTTTTGTTCTCTTCCTCTTCCAACCTT
MDM4	1	204511851	204512035	MDM4_9	185	38	AGATAGTCTTAGTTATTACGTATTGTGCAT	GGTGTATAGTTGCTTCTCAAGTTTCC	AGATAGTCTTAGTTATTACGTATTGTGCATAGTTATCATTCTTTTCATTTGACTTCTATAGATGAAGACTTAATTGAAAATTTAGCCCAAGATGAAACATCTAGGCTGGACCTTGGATTTGAGGAGTGGGATGTAGCTGGCCTGCCTTGGTGGTTTTTAGGAAACTTGAGAAGCAACTATACACC
MDM4	1	204511944	204512136	MDM4_10	193	40	GAAACATCTAGGCTGGACCTTGG	AGTAACCAAGAATGTTACCCTTTCA	GAAACATCTAGGCTGGACCTTGGATTTGAGGAGTGGGATGTAGCTGGCCTGCCTTGGTGGTTTTTAGGAAACTTGAGAAGCAACTATACACCTAGAAGTAATGGCTCAACTGATTTACAGACAAATCAGGTAAATTTCACATTTGAAGGGAAGTGGTTTTTTTTCTTTTGAAAGGGTAACATTCTTGGTTACT
MDM4	1	204513567	204513766	MDM4_11	200	38	GTGTGACGACATTGAGTTTTGGG	TCAGCAGCTTCAACTTTTATTCCA	GTGTGACGACATTGAGTTTTGGGTTCATTTGTGTTGTTTCAACATCTCTGATAAACCTCTGAATACAGAAACTCATGTTTGTTTTTTTTCTGTTAGGATGTGGGTACTGCCATTGTTTCAGATACTACAGATGACTTGTGGTTTTTGAATGAGTCAGTATCAGAGCAGTTAGGTGTTGGAATAAAAGTTGAAGCTGCTGA
MDM4	1	204513667	204513856	MDM4_12	190	38	TGGGTACTGCCATTGTTTCAGAT	TGAGCACACAAACAGAATCAACAT	TGGGTACTGCCATTGTTTCAGATACTACAGATGACTTGTGGTTTTTGAATGAGTCAGTATCAGAGCAGTTAGGTGTTGGAATAAAAGTTGAAGCTGCTGATACTGAACAAACAAGTGAAGAAGTAGGGAAAGTAAGTGACAAAAAGGTATGTTGTGGAAAAATTCCATGTTGATTCTGTTTGTGTGCTCA
MDM4	1	204515864	204516046	MDM4_13	183	39	AGTTAATTAGCCTCATCTAAAACAAGTAAA	GATGGGGCTGGTGCAAAATAG	AGTTAATTAGCCTCATCTAAAACAAGTAAACATTACTAATGAGATGTTTTTGCCTTCACAGGTGATTGAAGTGGGAAAAAATGATGACCTGGAGGACTCTAAGTCCTTAAGTGATGATACCGATGTAGAGGTTACCTCTGAGGTATGAATCTTTAGCAAGAACTATTTTGCACCAGCCCCATC
MDM4	1	204518171	204518369	MDM4_14	199	42	GACCTCCTTTCCTTTTTCTCAGC	AGACGTGGAGAGAGAATGGGTTA	GACCTCCTTTCCTTTTTCTCAGCATCATATTAACCCCCTGAGTATTAATTGGCTTCACTTGTCTTTGTAGGATGAGTGGCAGTGTACTGAATGCAAGAAATTTAACTCTCCAAGCAAGAGGTACTGTTTTCGTTGTTGGGCCTTGAGGAAGGATTGGTATTCAGATTGTTCAAAGTTAACCCATTCTCTCTCCACGTCT
MDM4	1	204518277	204518460	MDM4_15	184	43	TCTCCAAGCAAGAGGTACTGTTT	CTTTAGGTCTAACGACAGGAGCC	TCTCCAAGCAAGAGGTACTGTTTTCGTTGTTGGGCCTTGAGGAAGGATTGGTATTCAGATTGTTCAAAGTTAACCCATTCTCTCTCCACGTCTGATATCACTGCCATACCTGAAAAGGAAAATGAAGGAAATGATGTCCCTGATTGTCGAAGAACCATTTCGGCTCCTGTCGTTAGACCTAAAG
MDM4	1	204518346	204518542	MDM4_16	197	41	TTAACCCATTCTCTCTCCACGTC	TCAGAACTGTGAGCCAAATCCAA	TTAACCCATTCTCTCTCCACGTCTGATATCACTGCCATACCTGAAAAGGAAAATGAAGGAAATGATGTCCCTGATTGTCGAAGAACCATTTCGGCTCCTGTCGTTAGACCTAAAGATGCGTATATAAAGAAAGAAAACTCCAAACTTTTTGATCCCTGCAACTCAGTGGAATTCTTGGATTTGGCTCACAGTTCTGA
MDM4	1	204518459	204518645	MDM4_17	187	41	AGATGCGTATATAAAGAAAGAAAACTCC	TGGCTTCAAGAGATTCTGGCAAT	AGATGCGTATATAAAGAAAGAAAACTCCAAACTTTTTGATCCCTGCAACTCAGTGGAATTCTTGGATTTGGCTCACAGTTCTGAAAGCCAAGAGACCATCTCAAGCATGGGAGAACAGTTAGATAACCTTTCTGAACAGAGAACAGATACAGAAAACATGGAGGATTGCCAGAATCTCTTGAAGCCA
MDM4	1	204518542	204518737	MDM4_18	196	44	AAAGCCAAGAGACCATCTCAAGC	AGTCTTCTGGCACAGTGAAAACA	AAAGCCAAGAGACCATCTCAAGCATGGGAGAACAGTTAGATAACCTTTCTGAACAGAGAACAGATACAGAAAACATGGAGGATTGCCAGAATCTCTTGAAGCCATGTAGCTTATGTGAGAAAAGACCACGAGACGGGAACATTATTCATGGAAGGACGGGCCATCTTGTCACTTGTTTTCACTGTGCCAGAAGACT
MDM4	1	204518610	204518807	MDM4_19	198	43	GAAAACATGGAGGATTGCCAGAA	TGCTATAAAAACCTTAATAACCAGCTGAA	GAAAACATGGAGGATTGCCAGAATCTCTTGAAGCCATGTAGCTTATGTGAGAAAAGACCACGAGACGGGAACATTATTCATGGAAGGACGGGCCATCTTGTCACTTGTTTTCACTGTGCCAGAAGACTAAAGAAGGCTGGGGCTTCATGCCCTATTTGCAAGAAAGAGATTCAGCTGGTTATTAAGGTTTTTATAGCA
MDM4	1	204518746	204518938	MDM4_20	193	34	CTGGGGCTTCATGCCCTATTT	CAGCTACCTTGGATTTTGATGCC	CTGGGGCTTCATGCCCTATTTGCAAGAAAGAGATTCAGCTGGTTATTAAGGTTTTTATAGCATAATGGTAGTACGAACATAAAAATGCATTTATTCCGTTCACTTACCACATTATTTGAAAATCAATCCTTTATTTAATTTTATTTCCAACCTGTCAGAGAATGTTCTTAGGCATCAAAATCCAAGGTAGCTG
EXO1	1	242013670	242013868	EXO1_1	199	41	TCTTTAAATATTACTGTTCTCCCTGTCT	GGCTAGTTTTTCAGCACAAGCAA	TCTTTAAATATTACTGTTCTCCCTGTCTCTTTTCATATCAGGTAGTTAATTTGGCACCATGGGGATACAGGGATTGCTACAATTTATCAAAGAAGCTTCAGAACCCATCCATGTGAGGAAGTATAAAGGGCAGGTAGTAGCTGTGGATACATATTGCTGGCTTCACAAAGGAGCTATTGCTTGTGCTGAAAAACTAGCC
EXO1	1	242013728	242013920	EXO1_2	193	41	ATGGGGATACAGGGATTGCTACA	TGTCAAAGAATTAACATAAGGTCCAGA	ATGGGGATACAGGGATTGCTACAATTTATCAAAGAAGCTTCAGAACCCATCCATGTGAGGAAGTATAAAGGGCAGGTAGTAGCTGTGGATACATATTGCTGGCTTCACAAAGGAGCTATTGCTTGTGCTGAAAAACTAGCCAAAGGTGAACCTACTGATAGGTAAGTCTGGACCTTATGTTAATTCTTTGACA
EXO1	1	242015559	242015758	EXO1_3	200	33	GGTGAAGCACTGAATGTTTTTCT	ACCTTAGTGCAATGAAGTTAGAGAT	GGTGAAGCACTGAATGTTTTTCTTTTTTTCCATAGGTATGTAGGATTTTGTATGAAATTTGTAAATATGTTACTATCTCATGGGATCAAGCCTATTCTCGTATTTGATGGATGTACTTTACCTTCTAAAAAGGAAGTAGAGAGATCTAGAAGAGAGTAAGTTAATTCTCTACTTAATCTCTAACTTCATTGCACTAAGGT
EXO1	1	242016606	242016804	EXO1_4	199	42	TCTTGAGTCAGCCTCTTAAATGTT	CCATCTGCCCCTTTGTCTTACTT	TCTTGAGTCAGCCTCTTAAATGTTTTATATTTAAAAAATGTTCTTCCCTTGCAGAAGACGACAAGCCAATCTTCTTAAGGGAAAGCAACTTCTTCGTGAGGGGAAAGTCTCGGAAGCTCGAGAGTGTTTCACCCGGTCTATCAATATCACACATGCCATGGCCCACAAAGTAATTAAAGTAAGACAAAGGGGCAGATGG
EXO1	1	242016682	242016865	EXO1_5	184	45	AAGGGAAAGCAACTTCTTCGTGA	ACCCTTGATTTTCTTCCTCTCCC	AAGGGAAAGCAACTTCTTCGTGAGGGGAAAGTCTCGGAAGCTCGAGAGTGTTTCACCCGGTCTATCAATATCACACATGCCATGGCCCACAAAGTAATTAAAGTAAGACAAAGGGGCAGATGGGCAAGTTCACCAAAGCTAGTTACAACTTGTTTATTGATGGGAGAGGAAGAAAATCAAGGGT
EXO1	1	242020572	242020765	EXO1_6	194	49	GTGGGTTTGAAACAGGAAGTTGT	AGGAGATCCGAGTCCTCTGTAAT	GTGGGTTTGAAACAGGAAGTTGTTTAGTACTTTCCAGATGCCGTGCTAGAGATTCACTGTGATTCTCTCTTCTAGGCTGCCCGGTCTCAGGGGGTAGATTGCCTCGTGGCTCCCTATGAAGCTGATGCGCAGTTGGCCTATCTTAACAAAGCGGGAATTGTGCAAGCCATAATTACAGAGGACTCGGATCTCCT
EXO1	1	242020664	242020861	EXO1_7	198	42	GGTAGATTGCCTCGTGGCTC	ACAGGAAAAATTTCAGCTCCTTGAT	GGTAGATTGCCTCGTGGCTCCCTATGAAGCTGATGCGCAGTTGGCCTATCTTAACAAAGCGGGAATTGTGCAAGCCATAATTACAGAGGACTCGGATCTCCTAGCTTTTGGCTGTAAAAAGGTACTCACCTCTGACTACTATATATTACTTTTCTATGTAGATAGTAGTGTAAATCAAGGAGCTGAAATTTTTCCTGT
EXO1	1	242021743	242021940	EXO1_8	198	40	GCAGTGGATTAGATAATGACAAAAGTGG	AGTCACAACCTGAAAGAATACACAT	GCAGTGGATTAGATAATGACAAAAGTGGCCCTTCTAGGTATTAACAATTTCCCTTCCTTTTGAAGGTAATTTTAAAGATGGACCAGTTTGGAAATGGACTTGAAATTGATCAAGCTCGGCTAGGAATGTGCAGACAGCTTGGGGATGTATTCACGGAAGAGAAGTTTCGTTACATGTGTATTCTTTCAGGTTGTGACT
EXO1	1	242021861	242022051	EXO1_9	191	41	GCTAGGAATGTGCAGACAGCTT	TTGAATATGACACTTAGCAAATCACTC	GCTAGGAATGTGCAGACAGCTTGGGGATGTATTCACGGAAGAGAAGTTTCGTTACATGTGTATTCTTTCAGGTTGTGACTACCTGTCATCACTGCGTGGGATTGGATTAGCAAAGGCATGCAAAGTCCTAAGACTAGCCAATAATCCAGATATAGTAAAGGTAAGAGTGATTTGCTAAGTGTCATATTCAA
EXO1	1	242023754	242023953	EXO1_10	200	37	GCCTTGAGGATAATATGTTCCCTGT	AGGAATAAGTTTCCTTTTGATGGGA	GCCTTGAGGATAATATGTTCCCTGTTCTTTAGTTGCAGATAAAATATTTTTGCATGCATTGTTAGGTTATCAAGAAAATTGGACATTATCTCAAGATGAATATCACGGTACCAGAGGATTACATCAACGGGTTTATTCGGGCCAACAATACCTTCCTCTATCAGCTAGTTTTTGATCCCATCAAAAGGAAACTTATTCCT
EXO1	1	242023857	242024041	EXO1_11	185	43	CACGGTACCAGAGGATTACATCA	GCACAAATTCTACCATTCTGTTTCA	CACGGTACCAGAGGATTACATCAACGGGTTTATTCGGGCCAACAATACCTTCCTCTATCAGCTAGTTTTTGATCCCATCAAAAGGAAACTTATTCCTCTGAACGCCTATGAAGATGATGTTGATCCTGAAACACTAAGCTACGCTGGGCAGTATCCTTTCTGAAACAGAATGGTAGAATTTGTGC
EXO1	1	242024640	242024838	EXO1_12	199	32	CCATCTTAGTATAATATCATTTGGTTGGTT	ACGTGTTTTCATAGGGTGGTCAT	CCATCTTAGTATAATATCATTTGGTTGGTTGTTAATAAATACATTTTTCCTTAATCTTGCTAATCTAGATATGTTGATGATTCCATAGCTCTTCAAATAGCACTTGGAAATAAAGATATAAATACTTTTGAACAGATCGATGACTACAATCCAGACACTGCTATGGTAACGTTTTGATGACCACCCTATGAAAACACGT
EXO1	1	242030041	242030233	EXO1_13	193	34	AAGATGTTTATTTATAATTTATGTTGATACAGAAGG	CGACTCTGGTCTGGGAGAGTAAT	AAGATGTTTATTTATAATTTATGTTGATACAGAAGGAAATAAATTGATTATTTTCTTTCTGCAAATAATCTTTTTCCTTTTCCTTTTCTAGCCTGCCCATTCAAGAAGTCATAGTTGGGATGACAAAACATGTCAAAAGTCAGCTAATGTTAGCAGCATTTGGCATAGGAATTACTCTCCCAGACCAGAGTCG
EXO1	1	242030128	242030327	EXO1_14	200	44	CTAGCCTGCCCATTCAAGAAGTC	TCCTTGGGAGATTTAACCCTTTAGT	CTAGCCTGCCCATTCAAGAAGTCATAGTTGGGATGACAAAACATGTCAAAAGTCAGCTAATGTTAGCAGCATTTGGCATAGGAATTACTCTCCCAGACCAGAGTCGGGTACTGTTTCAGATGCCCCACAATTGAAGGAAAATCCAAGTACTGTGGGAGTGGAACGAGTGATTAGTACTAAAGGGTTAAATCTCCCAAGGA
EXO1	1	242030235	242030428	EXO1_15	194	39	GTACTGTTTCAGATGCCCCACAA	TTTGCGTTGGGCAATGATTTCTT	GTACTGTTTCAGATGCCCCACAATTGAAGGAAAATCCAAGTACTGTGGGAGTGGAACGAGTGATTAGTACTAAAGGGTTAAATCTCCCAAGGAAATCATCCATTGTGAAAAGACCAAGAAGTGGTACGTATTTCAGTTTTGCAAAATGCTGGTGAATATTGgtcatatttaaagaaatcattgcccaacgcaaa
EXO1	1	242035274	242035462	EXO1_16	189	36	AGGCCAAATCTCTAAGTACAGGTG	CATTTACCAGGTCAGGCACAAAC	AGGCCAAATCTCTAAGTACAGGTGAAACAAAGATTTACAGATAATTTTGTTTTTATTTAGCAGAGCTGTCAGAAGATGACCTGTTGAGTCAGTATTCTCTTTCATTTACGAAGAAGACCAAGAAAAATAGCTCTGAAGGCAATAAATCATTGAGCTTTTCTGAAGTGTTTGTGCCTGACCTGGTAAATG
EXO1	1	242035335	242035518	EXO1_17	184	39	AGAGCTGTCAGAAGATGACCTGT	TGCAAATTTATTTCTCGTCCTAGGTG	AGAGCTGTCAGAAGATGACCTGTTGAGTCAGTATTCTCTTTCATTTACGAAGAAGACCAAGAAAAATAGCTCTGAAGGCAATAAATCATTGAGCTTTTCTGAAGTGTTTGTGCCTGACCTGGTAAATGGACCTACTAACAAAAAGAGTGTAAGCACTCCACCTAGGACGAGAAATAAATTTGCA
EXO1	1	242035439	242035618	EXO1_18	180	40	TGTTTGTGCCTGACCTGGTAAAT	TACAACAGACAATCAACATTCTGGAG	TGTTTGTGCCTGACCTGGTAAATGGACCTACTAACAAAAAGAGTGTAAGCACTCCACCTAGGACGAGAAATAAATTTGCAACATTTTTACAAAGGAAAAATGAAGAAAGTGGTGCAGTTGTGGTTCCAGGGACCAGAAGCAGGTATAGTTATGTCTCCAGAATGTTGATTGTCTGTTGTA
EXO1	1	242041983	242042181	EXO1_19	199	37	TTGACACCCCTTGAGAAAACTCT	TCTTGCCTTCTTGGTCTCCATAC	TTGACACCCCTTGAGAAAACTCTAAAATACTCATACTTACTTATTGTTTCTATTGCTTTTTTTATTAGGTTTTTTTGCAGTTCAGATTCTACTGACTGTGTATCAAACAAAGTGAGCATCCAGCCTCTGGATGAAACTGCTGTCACAGATAAAGAGAACAATCTGCATGAATCAGAGTATGGAGACCAAGAAGGCAAGA
EXO1	1	242042090	242042281	EXO1_20	192	42	CAAAGTGAGCATCCAGCCTCT	TCTGTAAACACTGTTGCCTTGTC	CAAAGTGAGCATCCAGCCTCTGGATGAAACTGCTGTCACAGATAAAGAGAACAATCTGCATGAATCAGAGTATGGAGACCAAGAAGGCAAGAGACTGGTTGACACAGATGTAGCACGTAATTCAAGTGATGACATTCCGAATAATCATATTCCAGGTGATCATATTCCAGACAAGGCAACAGTGTTTACAGA
EXO1	1	242042186	242042384	EXO1_21	199	41	GGTTGACACAGATGTAGCACGTA	TCCAAGACCTCCAGACCAACTAA	GGTTGACACAGATGTAGCACGTAATTCAAGTGATGACATTCCGAATAATCATATTCCAGGTGATCATATTCCAGACAAGGCAACAGTGTTTACAGATGAAGAGTCCTACTCTTTTGAGAGCAGCAAATTTACAAGGACCATTTCACCACCCACTTTGGGAACACTAAGAAGTTGTTTTAGTTGGTCTGGAGGTCTTGGA
EXO1	1	242042257	242042453	EXO1_22	197	46	CAGACAAGGCAACAGTGTTTACAG	GGAATCGCTCTTTCTTCGGAACT	CAGACAAGGCAACAGTGTTTACAGATGAAGAGTCCTACTCTTTTGAGAGCAGCAAATTTACAAGGACCATTTCACCACCCACTTTGGGAACACTAAGAAGTTGTTTTAGTTGGTCTGGAGGTCTTGGAGATTTTTCAAGAACGCCGAGCCCCTCTCCAAGCACAGCATTGCAGCAGTTCCGAAGAAAGAGCGATTCC
EXO1	1	242042382	242042573	EXO1_23	192	50	GGAGATTTTTCAAGAACGCCGAG	ACTTTCCTGGGACTGTGAAGAAC	GGAGATTTTTCAAGAACGCCGAGCCCCTCTCCAAGCACAGCATTGCAGCAGTTCCGAAGAAAGAGCGATTCCCCCACCTCTTTGCCTGAGAATAATATGTCTGATGTGTCGCAGTTAAAGAGCGAGGAGTCCAGTGACGATGAGTCTCATCCCTTACGAGAAGAGGCATGTTCTTCACAGTCCCAGGAAAGT
EXO1	1	242042480	242042679	EXO1_24	200	45	GTCTGATGTGTCGCAGTTAAAGAG	AATTTGAAAACAAAGCCTTCAGGA	GTCTGATGTGTCGCAGTTAAAGAGCGAGGAGTCCAGTGACGATGAGTCTCATCCCTTACGAGAAGAGGCATGTTCTTCACAGTCCCAGGAAAGTGGAGAATTCTCACTGCAGAGTTCAAATGCATCAAAGCTTTCTCAGTGCTCTAGTAAGGACTCTGATTCAGAGGTAAGTCAAATCCTGAAGGCTTTGTTTTCAAATT
EXO1	1	242045132	242045321	EXO1_25	190	32	CCATTTTGTTGAATATTAGTTTGTTGTCAT	ACCTTGTTCCTTAGAGGTGTGTC	CCATTTTGTTGAATATTAGTTTGTTGTCATAAAAATTCTACAGTAAAAATCTAATTTTATTTTATTTTTTGATCTGGGGACTCTAGGAATCTGATTGCAATATTAAGTTACTTGACAGTCAAAGTGACCAGACCTCCAAGCTACGTTTATCTCATTTCTCAAAAAAAGACACACCTCTAAGGAACAAGGT
EXO1	1	242045201	242045395	EXO1_26	195	34	TGATCTGGGGACTCTAGGAATCT	GCTTGTATTTCTCATTTTCTAGTTGTAAGCA	TGATCTGGGGACTCTAGGAATCTGATTGCAATATTAAGTTACTTGACAGTCAAAGTGACCAGACCTCCAAGCTACGTTTATCTCATTTCTCAAAAAAAGACACACCTCTAAGGAACAAGGTAAAACatttatttaattttttttttaatttCAGAAGCGGTGTATGCTTACAACTAGAAAATGAGAAATACAAGC
EXO1	1	242048581	242048768	EXO1_27	188	48	ACAGAATGGTCTTAAAATGGGTGT	CTGTAACCCCGGCTTGTTCTC	ACAGAATGGTCTTAAAATGGGTGTTTAATCTTCAGGTTCCTGGGCTATATAAGTCCAGTTCTGCAGACTCTCTTTCTACAACCAAGATCAAACCTCTAGGACCTGCCAGAGCCAGTGGGCTGAGCAAGAAGCCGGCAAGCATCCAGAAGAGAAAGCATCATAATGCCGAGAACAAGCCGGGGTTACAG
EXO1	1	242048692	242048884	EXO1_28	193	41	CCAGTGGGCTGAGCAAGAA	AGTTGGGAGAAAGGGATGGAAA	CCAGTGGGCTGAGCAAGAAGCCGGCAAGCATCCAGAAGAGAAAGCATCATAATGCCGAGAACAAGCCGGGGTTACAGATCAAACTCAATGAGCTCTGGAAAAACTTTGGATTTAAAAAGTGAGTTGCCTTGTTTCTTATTCTGAAACAAGATAAACTGTTATTTTCTGTAATTTCCATCCCTTTCTCCCAACT
EXO1	1	242052692	242052877	EXO1_29	186	37	TTGTCCAGGTAGAATATTTCTTCTCTAA	CGGCCACATTCAGGTTTGTTAAAT	TTGTCCAGGTAGAATATTTCTTCTCTAATAATCAGTACCTTAAAAATACCAAATGTATTTTATTGTATTTTGCAGAGATTCTGAAAAGCTTCCTCCTTGTAAGAAACCCCTGTCCCCAGTCAGAGATAACATCCAACTAACTCCAGAAGCGGAAGAGGATATATTTAACAAACCTGAATGTGGCCG
EXO1	1	242052778	242052972	EXO1_30	195	44	AGCTTCCTCCTTGTAAGAAACCC	CTCATTCCCAAACAGGGACTTCA	AGCTTCCTCCTTGTAAGAAACCCCTGTCCCCAGTCAGAGATAACATCCAACTAACTCCAGAAGCGGAAGAGGATATATTTAACAAACCTGAATGTGGCCGTGTTCAAAGAGCAATATTCCAGTAAATGCAGACTGCTGCAAAGCTTTTGCCTGCAAGAGAATCTGATCAATTTGAAGTCCCTGTTTGGGAATGAG
FGFR2	10	123239005	123239186	FGFR2_1	182	49	ATTTGTGCTCTGTAAGTGTGTGC	AGGAGGAGAAGAAGGTTTCTGGA	ATTTGTGCTCTGTAAGTGTGTGCTGACATAAATCTTCTCCAATTATTACAAAATTAACAAGGAAGGCAGAACGCACGTCCACCTTGAGTCCTACTGGTCCACAGCCAGTACGCACGGCAGGTGAGAGGGGTTACATGGTGGCTTGTGGCAGTCCACTGCTCCAGAAACCTTCTTCTCCTCCT
FGFR2	10	123239131	123239322	FGFR2_2	192	44	GGGGTTACATGGTGGCTTGT	TACACTGAGCAGGGAGACCAT	GGGGTTACATGGTGGCTTGTGGCAGTCCACTGCTCCAGAAACCTTCTTCTCCTCCTGGGGAAGATTACAAGTTTTCAACTGTATAAATCTTTACACATATGCTGATTACTTTTCCAATTATTTACTCCTCTGATCCATATATACAAGTGGAGACAACAAGCTCTGGGAGGCATGGTCTCCCTGCTCAGTGTA
FGFR2	10	123239300	123239478	FGFR2_3	179	48	GCATGGTCTCCCTGCTC	agaAGTTCTTGTTCTTCAGGAGATG	GCATGGTCTCCCTGCTCAGTGTAGCTAGGTTCCCAGTGCTGTCCTGTTTGGGGACAGGCAGACACAGTCATTCATGTTTTAACACTGCCGTTTATGTGTGGATACTGAGGAAGGCATGGTTCGTAAGGCATGGGGTCTGGAGAAAAAACAGAATCATCTCCTGAAGAACAAGAACTtct
FGFR2	10	123239402	123239592	FGFR2_4	191	44	TACTGAGGAAGGCATGGTTCGTA	TTCACCTTGTTATCCTGACCCAA	TACTGAGGAAGGCATGGTTCGTAAGGCATGGGGTCTGGAGAAAAAACAGAATCATCTCCTGAAGAACAAGAACTtcttgtgtcagggtaactaggtgaatactgttcgagaggttggctgaggtccaagtattcctgaaagaagggaagagagacgttttatttcatcttgggtcaggataacaaggtgaa
FGFR2	10	123241636	123241829	FGFR2_5	194	40	CCACTGCGCCTGACCA	CAGAAGTTGAAAGGAAAGGAACGG	ccactgcgcctgaccAACTTTTCCCAGTTTCTCAATGAAGCCATAAACTTTCAGATCTGATAGGAAAAAAACAGGGATATCAGTAGATTCCAAGTCTACAGTTAAAGGAACTTATACTAGAAACAACAATTTTGGCAGAAGAAGAAAGTTGGTTTCTTCCCCCCCTTGAACCGTTCCTTTCCTTTCAACTTCTG
FGFR2	10	123243175	123243374	FGFR2_6	200	45	AACCAAGGACAAGGGGCTTCTA	CTATAACCACGTACCCAGTGCAT	AACCAAGGACAAGGGGCTTCTAGAAGGAAGTTCTTACCTCATTGGTTGTGAGAGTGAGAATTCGATCCAAGTCTTCTACCAACTGCTTGAACGTTGGTCTCTGGGAGGGCACTGCATGCCAACAGTCCCTCATCATCATGTACCTGGGAAAAATGGATTTCCTTGAATTAATTTCATATGCACTGGGTACGTGGTTATAG
FGFR2	10	123244849	123245046	FGFR2_7	198	54	GAGGTATTACTGGTGTGGCAAGT	CTGGTCCTTCGGGGTGTTAATG	GAGGTATTACTGGTGTGGCAAGTCCACTGGGGCACCGGCAGGAAAGACAACAGCCCTTACAGTTCGTTGGTGCAGTTGGCTGGCTTATCCATTCTGTGTCCTTCCTTCAGCAGCTTAAAAAGTTCCTCCACGGGAATCCCTGGGTAGGGCGAGCCCCCTAAAGTGAAGATCTCCCACATTAACACCCCGAAGGACCAG
FGFR2	10	123244888	123245075	FGFR2_8	188	51	AGGAAAGACAACAGCCCTTACAG	TAATGCCGTGCTTTCTCCTTTTG	AGGAAAGACAACAGCCCTTACAGTTCGTTGGTGCAGTTGGCTGGCTTATCCATTCTGTGTCCTTCCTTCAGCAGCTTAAAAAGTTCCTCCACGGGAATCCCTGGGTAGGGCGAGCCCCCTAAAGTGAAGATCTCCCACATTAACACCCCGAAGGACCAGCTGCAACAAAAGGAGAAAGCACGGCATTA
FGFR2	10	123246821	123247009	FGFR2_9	189	42	TTGCAGCTCAAGCCCAG	GCCCTATTGAGCCTGCTAAGATAAA	TTGCAGCTCAAGCCCAGGAAAAAGCCAGAGAAAAGAGAGTTACTCACACATCACTCTGATGAGTGTATACTCTATCAAACAGGGCTTCTGGAGCCATCCACTTGACTGGAAGCCGCCCCTGCAAATGTAGAGGAAAATGCAAAAACTAAATATATTTAAAAGAATTTATCTTAGCAGGCTCAATAGGGC
FGFR2	10	123247440	123247639	FGFR2_10	200	42	TTCTTCCTGGAACATTCTGAGCC	TCTTGATTTCAGTGTATTCATCGAGATTT	TTCTTCCTGGAACATTCTGAGCCTCACCCCCGCCCCTGCCCACTGTGTTACTGCCATCGACTTACATTGGTGGTCTTTTTGTAATAGTCTATATTGTTGATATCTCTGGCGAGTCCAAAGTCTGCTATTTTCATCACATTGTTTTCTGTTACCAAAACATTTCTGGCTGCTAAATCTCGATGAATACACTGAAATCAAGA
FGFR2	10	123247553	123247745	FGFR2_11	193	32	TCCAAAGTCTGCTATTTTCATCACA	ACTGGTTTTTAACATCAGCTATATTTTCT	TCCAAAGTCTGCTATTTTCATCACATTGTTTTCTGTTACCAAAACATTTCTGGCTGCTAAATCTCGATGAATACACTGAAATCAAGAAAGAAGCAAGAGAAATAACTAATTTCAAAACACCGCCAGAACAAAAAGGAAATATGTTCATTTCTTAAAATGCAGATAGAAAATATAGCTGATGTTAAAAACCAGT
FGFR2	10	123256011	123256209	FGFR2_12	199	53	ATTCCACCCAGCCAAGTAGAATG	CCTCTAAAGGCAACCTCCGAGAA	ATTCCACCCAGCCAAGTAGAATGTGAAAGACTCACTTTTTGGGAAGCCAAGTACTCCATGCCTCTGGCCAGCTGGTAGGTGCATGACACCAAGTCCTTGAAGGTCATCTGCTCCTCAGGAACACGGTTAATGTCATAGGAGTACTCCATCCCGGGTGGCCTCCGGGCTCGGAGGTATTCTCGGAGGTTGCCTTTAGAGG
FGFR2	10	123256089	123256281	FGFR2_13	193	52	GTGCATGACACCAAGTCCT	GACCCTGGATTCTCTCTTTAGGG	GTGCATGACACCAAGTCCTTGAAGGTCATCTGCTCCTCAGGAACACGGTTAATGTCATAGGAGTACTCCATCCCGGGTGGCCTCCGGGCTCGGAGGTATTCTCGGAGGTTGCCTTTAGAGGCATACTCAACTATGACATAGAGAGGCCCTGTTGAGGAAGAAGAGAAGCTCCCTAAAGAGAGAATCCAGGGTC
FGFR2	10	123257890	123258089	FGFR2_14	200	44	GAACTTTAAACATGCACACAGGG	TGGTGTCAGAGATGGAGATGATG	GAACTTTAAACATGCACACAGGGTGCTCTGGGAGCAGGATCTGGAAGCCCAGCCATTTCTAAAATGATTCAATCAAACTGCAGAGTATTTGGGCGAATGCAGTTTTTCCTCCTACTCACCATCCTGTGTGCAGGCTCCAAGAAGATTTATGATATTCTTGTGTTTCCCAATCATCTTCATCATCTCCATCTCTGACACCA
FGFR2	10	123257988	123258187	FGFR2_15	200	42	GCAGTTTTTCCTCCTACTCACCA	CAACTAACAGTAGCTGCCCATGA	GCAGTTTTTCCTCCTACTCACCATCCTGTGTGCAGGCTCCAAGAAGATTTATGATATTCTTGTGTTTCCCAATCATCTTCATCATCTCCATCTCTGACACCAGATCAGAAAGGTCTTTCTCTGTGGCATCATCTATGAACAGTAGGCATATTCACAAATCAGTTCATTTCCTCTAACTCATGGGCAGCTACTGTTAGTTG
FGFR2	10	123260284	123260468	FGFR2_16	185	59	TTCTTGATAAGACTCTCCACCCA	CATTTAGGCTGACACTGGGCAA	TTCTTGATAAGACTCTCCACCCAGCCCCTCCCCGAGCCTCCCGCCTCCCCGCTCACCTTTCAACATCTTCACGGCCACGGTGACCGCCTCCTTGGGCTTGTCTTTGTCAATTCCCACTGCTTCCGCCATGACCACTTGCCCAAAGCAACCTTCTCCCAGGGGCTTGCCCAGTGTCAGCCTAAATG
FGFR2	10	123260378	123260565	FGFR2_17	188	47	GGCTTGTCTTTGTCAATTCCCAC	TGCTTTAGTAAGCCGCTGAAAGA	GGCTTGTCTTTGTCAATTCCCACTGCTTCCGCCATGACCACTTGCCCAAAGCAACCTTCTCCCAGGGGCTTGCCCAGTGTCAGCCTAAATGTGTAAATAGGGGATTAGCACATAGCATCTGGTGATGGGGTGTAGTGAGGGAAATTCCAGAACTAAATATAAAAATCTTTCAGCGGCTTACTAAAGCA
FGFR2	10	123263205	123263403	FGFR2_18	199	47	GACCTTTGTGGCTAAGGGTCATA	TAACAACACGCCTCTCTTCAACG	GACCTTTGTGGCTAAGGGTCATAAAAAGAAAATGTTAATCCAATATCCCCATTTATAGCTGAGTCTCCATCCTGGGACATGGCCAAGAGAAGTACTCACTTATCTCTTGGAAACTCCCATTTTGGGTCCTCTGGAAGTTCATACTCGGAGACCCCTGCCAGCATGGGGGTGTCTGCCGTTGAAGAGAGGCGTGTTGTTA
FGFR2	10	123263310	123263506	FGFR2_19	197	53	CTTGGAAACTCCCATTTTGGGTC	CTTCTCAGATGGAGCCAGGATTA	CTTGGAAACTCCCATTTTGGGTCCTCTGGAAGTTCATACTCGGAGACCCCTGCCAGCATGGGGGTGTCTGCCGTTGAAGAGAGGCGTGTTGTTATCCTCACCAGCGGGGTGTTGGAGTTCATGGAGGAGCTGGACTCAGCCGAAACCTGGATACAAAATGCAAAGACACAGATGTAATCCTGGCTCCATCTGAGAAG
FGFR2	10	123274555	123274754	FGFR2_20	200	51	AAGCAGAGGACAAGATCCACAAG	CGCCTGTATGGTGGTAACAGTC	AAGCAGAGGACAAGATCCACAAGCTGGCTGGGTCATGGGGGAGGAGTAAATTTCTTTAAACTCTTTATCTACTTTCTGTTACCTGTCTCCGCAGGGGGATACGTTTGGTCAGCTTGTGCACAGCCGGCTGGCTGCTGAAGTCTGGCTTCTTGGTCGTGTTCTTCATTCGGCACAGGATGACTGTTACCACCATACAGGCG
FGFR2	10	123274681	123274878	FGFR2_21	198	50	GCTGGCTGCTGAAGTCTGG	CTATGGCCTGCTTATCTGTTCCT	GCTGGCTGCTGAAGTCTGGCTTCTTGGTCGTGTTCTTCATTCGGCACAGGATGACTGTTACCACCATACAGGCGATTAAGAAGACCCCTATGCAGTAAATGGCTATCTCCAGGTAGTCTGGGGAAGCTGTAATCTCCTTTTCTCTTCCAGGCGCTAGATTGCAGATCACAGGAGGAGGAACAGATAAGCAGGCCATAG
FGFR2	10	123276734	123276925	FGFR2_22	192	41	GGATAAAAGGGGCCATTTCTGATAAC	ATGTAACTTTTGAGGACGCTGGG	GGATAAAAGGGGCCATTTCTGATAACAGAAGCTGTGTTAATTTTATAGCAGTCAACCAAGAAAAGGGAAAAAAACCCAGAGAGAAAGAACAGTATATACCTGGCAGAACTGTCAACCATGCAGAGTGAAAGGATATCCCAATAGAATTACCCGCCAAGCACGTATATTCCCCAGCGTCCTCAAAAGTTACAT
FGFR2	10	123276828	123277020	FGFR2_23	193	46	TATACCTGGCAGAACTGTCAACC	CCTGTGTCGTCTAGCCTTTTCTT	TATACCTGGCAGAACTGTCAACCATGCAGAGTGAAAGGATATCCCAATAGAATTACCCGCCAAGCACGTATATTCCCCAGCGTCCTCAAAAGTTACATTCCGAATATAGAGAACCTCAATCTCTTTGTCCGTGGTGTTAACACCGGCGGCCTAGAAAACAAGGGAAGCAAAAGAAAAGGCTAGACGACACAGG
FGFR2	10	123278120	123278318	FGFR2_24	199	44	CCCAAAGCACCAAGTCTTTTCAG	CAGAAGTGCTGGCTCTGTTCAAT	CCCAAAGCACCAAGTCTTTTCAGCTTCTATATCCAGCTTTCTTTTTAAAAAAAGACAAAAATGAAAGCATTGTTACCTTGCTGTTTTGGCAGGACAGTGAGCCAGGCAGACTGGTTGGCCTGCCCTATATAATTGGAGACCTTACATATATATTCCCCAGCATCCGCCTCGGTCACATTGAACAGAGCCAGCACTTCTG
FGFR2	10	123278185	123278384	FGFR2_25	200	49	AGCATTGTTACCTTGCTGTTTTGG	TCCTGGTTGGCCGTTATATTGTT	AGCATTGTTACCTTGCTGTTTTGGCAGGACAGTGAGCCAGGCAGACTGGTTGGCCTGCCCTATATAATTGGAGACCTTACATATATATTCCCCAGCATCCGCCTCGGTCACATTGAACAGAGCCAGCACTTCTGCATTGGAACTATTTATCCCCGAGTGCTAGAACAGACACAGGAGAACAATATAACGGCCAACCAGGA
FGFR2	10	123279442	123279632	FGFR2_26	191	54	CCATGAAGGAGACCCCAGTTG	CCACAGTGGTCGGAGGA	CCATGAAGGAGACCCCAGTTGTGGGTACCTTTAGATTCAGAAAGTCCTCACCTTGAGAACCTTGAGGTAGGGCAGCCCGTCGGGCCCGTATTTACTGCCGTTCTTTTCCACGTGCTTGATCCACTGGATGTGGGGCTGGGCATCACTGTAAACCTTGCAGACAAACTCTACGTCTCCTCCGACCACTGTGG
FGFR2	10	123279526	123279712	FGFR2_27	187	57	CCCGTATTTACTGCCGTTCTTTT	ACTCCTCCTTTCTTCCCTCTCTC	CCCGTATTTACTGCCGTTCTTTTCCACGTGCTTGATCCACTGGATGTGGGGCTGGGCATCACTGTAAACCTTGCAGACAAACTCTACGTCTCCTCCGACCACTGTGGAGGCATTTGCCGGCAGTCCGGCTTGGAGGATGGGCCGGTGAGGCGATCGCTCTGGTGGAGAGAGGGAAGAAAGGAGGAGT
FGFR2	10	123298039	123298218	FGFR2_28	180	50	TGCTTTCAAACGAGTCAAGCAAG	GCACTGGAGCCTCATTATGGAAA	TGCTTTCAAACGAGTCAAGCAAGAATGGGCTGGTATGCAGCCGCCACACGAGGAGAGGCAAACTCACCCACAACATCCAGGTGGTACGTGTGATTGATGGACCCGTATTCATTCTCCACTACACAGGTATAATTTCCCTTGTCAGATGGGACCACACTTTCCATAATGAGGCTCCAGTGC
FGFR2	10	123298113	123298292	FGFR2_29	180	44	ATCCAGGTGGTACGTGTGATTGA	GCACAGTACTTGGTATTCTGTGCT	ATCCAGGTGGTACGTGTGATTGATGGACCCGTATTCATTCTCCACTACACAGGTATAATTTCCCTTGTCAGATGGGACCACACTTTCCATAATGAGGCTCCAGTGCTGGTTTCGTACCTGAAAAGATCAAAGCAAAGGCGGTTATTTAACAATCCTAGCACAGAATACCAAGTACTGTGC
FGFR2	10	123310772	123310970	FGFR2_30	199	52	AGAAATGTGATGTTCTGAAAGCTTAAT	CACCATACTGGACCAACACAGAA	AGAAATGTGATGTTCTGAAAGCTTAATTCTACCTTGTAGCCTCCAATGCGATGCTCCTGCTTAAACTCCTTCCCGTTTTTCAGCCACCGCATGGTTGGCATTGGGTTCCCCCCGGCTGGGCAGCGAAACTTGACAGTGTTGGCCGCAGGCACAGCATGGAGCCGCTTTTCCATCTTTTCTGTGTTGGTCCAGTATGGTG
FGFR2	10	123310827	123311023	FGFR2_31	197	52	CCTGCTTAAACTCCTTCCCGTTT	GAGGGGAAGCTGTCCATCAGTAT	CCTGCTTAAACTCCTTCCCGTTTTTCAGCCACCGCATGGTTGGCATTGGGTTCCCCCCGGCTGGGCAGCGAAACTTGACAGTGTTGGCCGCAGGCACAGCATGGAGCCGCTTTTCCATCTTTTCTGTGTTGGTCCAGTATGGTGCTCCTGTTTTGGAAAACAGTATTAGAATGTATACTGATGGACAGCTTCCCCTC
FGFR2	10	123323964	123324157	FGFR2_32	194	46	CTTCCCTCCATGCTCCTCTCTC	AGATAATTGCAACCTTTTTGCTTTGC	CTTCCCTCCATGCTCCTCTCTCGGGGACCATCGGAGCCGGGCAGTTACTTACTCTTGTTGTTACTGTTCTCACTGACAAAATCTTCCGCACCATCGGTGTCATCCTCATCATCTCCGGATGAGATGGCATCTGTATGCAAAAGAACATATTCCATGGATGTGTTTTTTGCAAAGCAAAAAGGTTGCAATTATCT
FGFR2	10	123324907	123325091	FGFR2_33	185	52	ATGGCTACAGAGAAGAGAGAGCA	GGGGCCCAACAATAGGACAG	ATGGCTACAGAGAAGAGAGAGCATAGTGCTGGCGGGCCAACTCACCTGTGACATTCACCATGAAGTACCAAGTTTCACTGTCTACAGTCCTACTGGCAGTACAAGCATAGAGGCCGGAGTCTCTAGGCGTGGCGCCCTTTATCTGCAAGTACTCCCCAATAAGCACTGTCCTATTGTTGGGCCCC
FGFR2	10	123325049	123325243	FGFR2_34	195	54	CTGCAAGTACTCCCCAATAAGCA	TCTTCTCTCTCCCACCTTTCT	CTGCAAGTACTCCCCAATAAGCACTGTCCTATTGTTGGGCCCCAAGTGCACCCCATCCTTAGTCCAACTGATCACGGCGGCATCTTTCAACAGGCAGCGCACCTCTAGCGACTCCCCTGGCGCAGCCACGTACACTTCTGGTTGAGAGATTTGGTATTTGGTTGGTGGCTCTGCAGAAAGGTGGGAGAGAGAAGA
FGFR2	10	123353161	123353360	FGFR2_35	200	50	TTAACAATCTGCCCCCAGACAAA	GAAGAGGACCGGGGATTGGTA	TTAACAATCTGCCCCCAGACAAATCCCAAAACAAACCTGAAAAGTGAAATTAAATGACTTACCTTCTGGCTCTAATGTGGTATCCTCAACTAAACTGAAGGAGGGCCGGGCCAGGGACAAGGTTGCCATGGTGACCACGACCAGGCAGATGAAACGACCCCAGCTGACCATGGTTACGGTACCAATCCCCGGTCCTCTTC
DNAJC1	10	22045551	22045744	DNAJC1_1	194	38	TTCTGCATAAGATTTTTAAGATATTCATTTTGG	TGATGACCACACTGACTTGTGC	TTCTGCATAAGATTTTTAAGATATTCATTTTGGAAAATGAAGGTGAACATCATCTCCCAGAATATTCAGCTTTTAGCTTGTTTTTTCTTTTGGACCAGTTCAACCAGCAACTTGTACCTAGCGATACAGTCTTCCTGTAGGAAGAAAAAAAGAGAGGTGAGAACAGTCACTTGCACAAGTCAGTGTGGTCATCA
DNAJC1	10	22048031	22048210	DNAJC1_2	180	54	CAGACAAGCTGTGGCTCCTC	GCCGTGGACTCAAAATCAACAGA	CAGACAAGCTGTGGCTCCTCTGGTGGGATTCTAACACCTGTGCAGAGGCCTCTTTCCCCATCACTCACCTTGCTCTTGGACGGGACACATCTGGCTATTTTGTCCCAGCGGTCAGAGGATCCCCTTGGGTACTGCTGCAACGCCAGTTCCAGAAGTTTCTGTTGATTTTGAGTCCACGGC
DNAJC1	10	22048125	22048319	DNAJC1_3	195	53	CTATTTTGTCCCAGCGGTCAGAG	CAGAGGAGAAGTCCAGAGCCAA	CTATTTTGTCCCAGCGGTCAGAGGATCCCCTTGGGTACTGCTGCAACGCCAGTTCCAGAAGTTTCTGTTGATTTTGAGTCCACGGCTCCTCTGCAGACCGAGCTCTCTCTTTTCTCAGGCTCTCCTCGTCGCTGGACTCGTTTTGTTCTGCTATGTCAAAGTCCTTCTGCCGCTTGGCTCTGGACTTCTCCTCTG
DNAJC1	10	22048249	22048433	DNAJC1_4	185	64	CTCGTCGCTGGACTCGTTT	CAGCGGAGGAGGAGCAG	CTCGTCGCTGGACTCGTTTTGTTCTGCTATGTCAAAGTCCTTCTGCCGCTTGGCTCTGGACTTCTCCTCTGGCTCCGGCTTCGCTGTAGCCTCCAGCAGCCTGGCTGGCTTCCGCCTCCGAGGCCGGGCATCAGTGGCCCCGGTCTCCTGCTCACCGGAGTCTCCCTCCTGCTCCTCCTCCGCTG
DNAJC1	10	22048297	22048483	DNAJC1_5	187	67	CTTGGCTCTGGACTTCTCCTCT	CACCTTGCCCGATGACATGA	CTTGGCTCTGGACTTCTCCTCTGGCTCCGGCTTCGCTGTAGCCTCCAGCAGCCTGGCTGGCTTCCGCCTCCGAGGCCGGGCATCAGTGGCCCCGGTCTCCTGCTCACCGGAGTCTCCCTCCTGCTCCTCCTCCGCTGCCACCCCCTCTGCGTCCTCTCGCTGGGTGATCATGTCATCGGGCAAGGTG
DNAJC1	10	22048407	22048604	DNAJC1_6	198	56	AGTCTCCCTCCTGCTCCTC	ACCGTCTCCTTAATTCACCTTGC	AGTCTCCCTCCTGCTCCTCCTCCGCTGCCACCCCCTCTGCGTCCTCTCGCTGGGTGATCATGTCATCGGGCAAGGTGGTGGCCGTTTTGATGGGCCTGGAATTCTGAACTGTCGATTTGAGTTCGGAGAGTCTAACCATTCCTAGGAAAGAGGGTGTGCCACACAGAGGTGAAGGGCAAGGTGAATTAAGGAGACGGT
DNAJC1	10	22055131	22055311	DNAJC1_7	181	38	AGGGATTAATTTAGAAGAAACCACTTTAG	ACATGGAATCGTTTCACTCAGCA	AGGGATTAATTTAGAAGAAACCACTTTAGATTAATGAGATAGAGGAAGTATGAACTCACCTGGGGAGCAGGTCACTGAATCCTTCAGTTGCTTGGCTTTGGTTGTCACCTGTTTCAAAACATAAAAGCAAAAATCTTACTTTCCATGTACCTACTATATGCTGAGTGAAACGATTCCATGT
DNAJC1	10	22094810	22095005	DNAJC1_8	196	47	CTCCCCAAAGATACTGTGGAACC	CCTCAGCCAACTGACAAGAAGTA	CTCCCCAAAGATACTGTGGAACCCATCTATGTCTGCCTTCTACATAGCTGACTTGTTCTGGTTTCTCTCTCTATACAATGCAAATCTCAGTGAACTCACATCTGTCACAGATCGACCCAATTCGTGGGCAATCTTTTCCCATCGACCTGGAGTCCCTCCTGGGAACTTAACCATACTTCTTGTCAGTTGGCTGAGG
DNAJC1	10	22094913	22095092	DNAJC1_9	180	41	GTCACAGATCGACCCAATTCGT	TTCTTCCAATTATCTTTTTATTTTCTCCCA	GTCACAGATCGACCCAATTCGTGGGCAATCTTTTCCCATCGACCTGGAGTCCCTCCTGGGAACTTAACCATACTTCTTGTCAGTTGGCTGAGGTCCTCTTCTGTCCATTCAGGTGCCTGCAAAACATTAAAGAAaataaaaaaagataattgggagaaaataaaaagataattggaagaa
DNAJC1	10	22171158	22171357	DNAJC1_10	200	32	TGTGCTTTTCTGTACATGTTTTACTCA	GTTAAAAAACCAAAACCTGAATTTCCT	TGTGCTTTTCTGTACATGTTTTACTCAAAACAAGTTTTATAAAGCTTATTTACCTGTTTTTTCTGTGTTCGGTTCCTGTTTTCCAACCAATCATCCATTTGTTCCTCAATTTCTTCTATGGAAGTTCCATGATCATAAGACTGAATATATGTAGTTTCTAAAGGTGTGTATACAGGAAATTCAGGTTTTGGTTTTTTAAC
DNAJC1	10	22171227	22171376	DNAJC1_11	150	33	CGGTTCCTGTTTTCCAACCAATC	TTTTTTAGAACAGAAGAAAGTTAAAAAACCAA	CGGTTCCTGTTTTCCAACCAATCATCCATTTGTTCCTCAATTTCTTCTATGGAAGTTCCATGATCATAAGACTGAATATATGTAGTTTCTAAAGGTGTGTATACAGGAAATTCAGGTTTTGGTTTTTTAACTTTCTTCTGTTCTAAAAAA
DNAJC1	10	22171329	22171481	DNAJC1_12	153	22	ACAGGAAATTCAGGTTTTGGTTTT	AGAACAATTATATTTTGATGTTTTCTTTCAGG	ACAGGAAATTCAGGTTTTGGTTTTTTAACTTTCTTCTGTTCTAAAAAATGTTTAAAAGAACCAATTATTGAGATTTTTAAAGAATAAAATTAATTTCTAACATTTTATTCATAGACCATATCCTGAAAGAAAACATCAAAATATAATTGTTCT
DNAJC1	10	22193349	22193548	DNAJC1_13	200	27	AGAAAACCAGAAAATTTAATTACTGCTGAA	TCTTAAGGATGCTGGGCAGTTTT	AGAAAACCAGAAAATTTAATTACTGCTGAATTTAAAAGATAATTCACatttaaataattaattttatatGACATTGTTAAAACACTAATGTTTAAAACTCACTTTGAAGTGTTTCAAGTTCAGTTCTAGTCAGTGCATCTTCCTTTTCCTTCAATCTTGTTTCTTTATATTTAGCATAAAACTGCCCAGCATCCTTAAGA
DNAJC1	10	22193479	22193663	DNAJC1_14	185	26	CAGTGCATCTTCCTTTTCCTTCAAT	TGAAAACAAAAAGAAAGCCTACTTATAAAAT	CAGTGCATCTTCCTTTTCCTTCAATCTTGTTTCTTTATATTTAGCATAAAACTGCCCAGCATCCTTAAGAAAAAAAGTTATACATAAATTAACATAAAAATCAGTGTGCTTCAATAATATTTTCCATGTAACTTAACTTTAAAGCATTATATTCATTTTATAAGTAGGCTTTCTTTTTGTTTTCA
DNAJC1	10	22207630	22207829	DNAJC1_15	200	37	AGCCGACATGGGCATAAAT	TGGTGTTCTTTTTTCTCCCTCCC	AGCCGACATGGGCATAAATTATTTCATGAGTGATTAAAAATAAAAGATCTAATGTTATATAAAAGAGGTACATTTTACCTGGATGAGGTGAGGTAATGCTTTTAGTGTAAGGCAAAACCAAATCCCCAGTTTGCATGGAAGCAAATCATGCCACTGTGGTTTCATCAGCAATCTAAAGGGAGGGAGAAAAAAGAACACCA
DNAJC1	10	22208644	22208823	DNAJC1_16	180	31	GACTACCACAGATATAAATGAGAGCACA	AAAAAAGACTGGCAGCAAGAGTG	GACTACCACAGATATAAATGAGAGCACATGTAAATAGACATACATATGAAGTTGAATCATATTAAAGATGTATTTTAAAACAGCTTCAAATTATAAAGTATTTTTATATGCTCTCACCTTTCATTTTTTTCTGAAGCACCGAGTTTTGATACATCCACACTCTTGCTGCCAGTCTTTTTT
DNAJC1	10	22208740	22208939	DNAJC1_17	200	34	AGTATTTTTATATGCTCTCACCTTTCATT	ACCCTTCACAGAAGAGCCTAGA	AGTATTTTTATATGCTCTCACCTTTCATTTTTTTCTGAAGCACCGAGTTTTGATACATCCACACTCTTGCTGCCAGTCTTTTTTTTCTTTTCTCTCTTTTTTCTACTTAGTAGTTCATCCTTAATGTGGAAAGAATTATGGTTACAGGTTATCATTAACATGTACACTTCAAATGTTATCTAGGCTCTTCTGTGAAGGGT
DNAJC1	10	22209651	22209841	DNAJC1_18	191	37	CAGTTGAAAAATAAATGTCCAAAATTCCA	CTACTACAGGCGGGTGAGAAAAA	CAGTTGAAAAATAAATGTCCAAAATTCCATATAAAATTAAGGAGGCTAGTTCATTTGATTTATTACTAACACTTACCAGTTGTTTTTCCAGGTAGATTGACCAAACCACAGCATAATGACCCACTGTGAGAATAATGAACAAGAGTAATGCCAGCTCAGCATTGCTCATTTTTCTCACCCGCCTGTAGTAG
DNAJC1	10	22209753	22209932	DNAJC1_19	180	41	AAACCACAGCATAATGACCCACT	TTTAAACTCCCCGTGAAAAACTG	AAACCACAGCATAATGACCCACTGTGAGAATAATGAACAAGAGTAATGCCAGCTCAGCATTGCTCATTTTTCTCACCCGCCTGTAGTAGAATACAGGCTGTCGCCAATCTGGAAGTCCATTGATCAGAATATCATCATACCTACAGTACAAATATAACAGTTTTTCACGGGGAGTTTAAA
DNAJC1	10	22217388	22217567	DNAJC1_20	180	33	GCATGAAACTATAACATCTTAATTCAAAAGCA	GCATGTGTATTGTAGTGCCTTCAC	GCATGAAACTATAACATCTTAATTCAAAAGCAGAAATGAACACTCACCTCTGCCTTCGTTCATCATCCTTTAAAACTTCATAAATGGCCACCAACTAAAATAAAAGCATTACTTTAAAATAAAAATACTCTCAACTATAAGAAATCACATAGGAGGGTGAAGGCACTACAATACACATGC
DNAJC1	10	22217897	22218096	DNAJC1_21	200	35	GTGAATATTTCTACCATCGACATGTTAATAC	TTTTCCCCTCCCCCTACCAC	GTGAATATTTCTACCATCGACATGTTAATACATTTGTCACAAAATATATATATAATAGCATATTTCACTTACTTGTCTAAACTGAGTTTCTGCATTTTCATCTTTATTCTTGTCTGGATGTAAAGTTAGTGAAAGCTTACGATATGCTTTTCTGATGTCTGCAGATGATGCATCCTGGAGGTGGTAGGGGGAGGGGAAAA
DNAJC1	10	22292088	22292273	DNAJC1_22	186	69	CCTGACGCCTGCCCTG	CTGCTGTGGCTGCTGCT	CCTGACGCCTGCCCTGGCCCCTCTCCGCCCGGCCCCGCGCGCCTCCTTGCTTACCTGCTGCACCCCGAGGAACTGGTAGAAGTTGAGCTGCACCTCCTCCACTAAGTCAAACAACTCCAGGTCTCCGCTCTCCCAgccgcgcgccggcgccacggcggccagcagcagcagcagcagccacagcag
DNAJC1	10	22292191	22292388	DNAJC1_23	198	74	AAGTCAAACAACTCCAGGTCTCC	GGGTGACCTTTCCGAGCC	AAGTCAAACAACTCCAGGTCTCCGCTCTCCCAgccgcgcgccggcgccacggcggccagcagcagcagcagcagccacagcagcggcgtccgcggcggcggcggcgggAACGGCACCAGCCCGAGCTGGCGGCGTCCAGGAAGCTGCGCCGGCTGGGAGCAAGGAGCCGTCATCGCGCTGGGCTCGGAAAGGTCACCC
ZNF365	10	64135890	64136070	ZNF365_1	181	48	GTAGTGTGTTTTTCAGCCGACTT	AGCTTCTAAATCTGGTATGGTCTCC	GTAGTGTGTTTTTCAGCCGACTTGTAAACTACCTATTTCCCCCCTCCCAGGACTTTTAGAGTAATGCAACAGAAGGCTTTTGAGGAAAGCAGATATCCCTGGCAGGAGTCCTTTGAGAATGTTGCTGTGTGCCTGCCATTACGCTGCCCGAGGTGTGGAGACCATACCAGATTTAGAAGCT
ZNF365	10	64135990	64136174	ZNF365_2	185	50	GGCAGGAGTCCTTTGAGAATGTT	GACTAGGTCTGTGTCTTTGAGGG	GGCAGGAGTCCTTTGAGAATGTTGCTGTGTGCCTGCCATTACGCTGCCCGAGGTGTGGAGACCATACCAGATTTAGAAGCTTGTCATCCTTGAGGGCCCATCTGGAGTTCAGTCACAGCTACGAAGAAAGAACCCTCTTGACAAAATGCAGTCTCTTTCCATCCCTCAAAGACACAGACCTAGTC
ZNF365	10	64136057	64136253	ZNF365_3	197	47	CAGATTTAGAAGCTTGTCATCCTTGA	AGTTAACATAGCTCGGTTTCTGC	CAGATTTAGAAGCTTGTCATCCTTGAGGGCCCATCTGGAGTTCAGTCACAGCTACGAAGAAAGAACCCTCTTGACAAAATGCAGTCTCTTTCCATCCCTCAAAGACACAGACCTAGTCACTTCCTCAGAACTCCTGAAACCGGGAAAATTGCAGAGCAGTGGCAACGTGGTAAAGCAGAAACCGAGCTATGTTAACT
ZNF365	10	64136165	64136345	ZNF365_4	181	49	AGACCTAGTCACTTCCTCAGAAC	GGCAGTGTAGGTCTGCACATAG	AGACCTAGTCACTTCCTCAGAACTCCTGAAACCGGGAAAATTGCAGAGCAGTGGCAACGTGGTAAAGCAGAAACCGAGCTATGTTAACTTGTACAGCATTTCACATGAACATTCCAAGGACAGGAAGCCATTTGAGGTGGTGGCAGAGAGGCCTGTGTCCTATGTGCAGACCTACACTGCC
ZNF365	10	64136275	64136474	ZNF365_5	200	54	ATTCCAAGGACAGGAAGCCATTT	CCTATCCACAGCCTCAACCATTC	ATTCCAAGGACAGGAAGCCATTTGAGGTGGTGGCAGAGAGGCCTGTGTCCTATGTGCAGACCTACACTGCCATGGACCTCCATGCAGACTCGCTGGATGGGACACGGTCGGGTCCTGGACTGCCCACCTCAGACACCAAAGCTTCTTTCGAGGCACATGTCAGAGAAAAATTCAATCGAATGGTTGAGGCTGTGGATAGG
ZNF365	10	64136318	64136517	ZNF365_6	200	51	TGTGTCCTATGTGCAGACCTAC	GGGCCAACTCTTTGGTGAGTTTA	TGTGTCCTATGTGCAGACCTACACTGCCATGGACCTCCATGCAGACTCGCTGGATGGGACACGGTCGGGTCCTGGACTGCCCACCTCAGACACCAAAGCTTCTTTCGAGGCACATGTCAGAGAAAAATTCAATCGAATGGTTGAGGCTGTGGATAGGACCATTGAGAAGAGAATTGATAAACTCACCAAAGAGTTGGCCC
ZNF365	10	64136463	64136653	ZNF365_7	191	50	GCTGTGGATAGGACCATTGAGAA	TGCCTCAGTACAGCTATCATTTCC	GCTGTGGATAGGACCATTGAGAAGAGAATTGATAAACTCACCAAAGAGTTGGCCCAGAAAACTGCGGAACTGTTGGAAGTTCGGGCAGCTTTTGTGCAGCTGACTCAGAAAAAGCAGGAAGTTCAGAGACGAGAGCGGGCCTTAAACAGACAGGTGGACGTGGCCGTGGAAATGATAGCTGTACTGAGGCA
ZNF365	10	64136554	64136738	ZNF365_8	185	51	TTGTGCAGCTGACTCAGAAAAAG	GCTTAAAGCAATGGGGTTAGCATC	TTGTGCAGCTGACTCAGAAAAAGCAGGAAGTTCAGAGACGAGAGCGGGCCTTAAACAGACAGGTGGACGTGGCCGTGGAAATGATAGCTGTACTGAGGCAACGCCTGACGGAATCTGAGGAGGAGCTTCTTAGGAAAGAAGAGTAAGTGTTGCTGACAGGGGATGCTAACCCCATTGCTTTAAGC
ZNF365	10	64148098	64148277	ZNF365_9	180	47	tgagtgaatTCCTTGCCTTATATTTCC	AGCTGCTTCTCCGCCAGTT	tgagtgaatTCCTTGCCTTATATTTCCCTTTTGTGTTCTGACATTTTTGCCTTGCAGAGAAGTTGTCACATTCAACCATTTCCTGGAAGCGGCAGCTGAGAAGGAGGTTCAAGGGAAAGCCCGGCTCCAGGACTTTATTGAGAATCTGTTACAGCGGGTAGAACTGGCGGAGAAGCAGCT
ZNF365	10	64148184	64148383	ZNF365_10	200	57	AAGCGGCAGCTGAGAAGG	ACCAACCACAGGGATCTTACACT	AAGCGGCAGCTGAGAAGGAGGTTCAAGGGAAAGCCCGGCTCCAGGACTTTATTGAGAATCTGTTACAGCGGGTAGAACTGGCGGAGAAGCAGCTTGAGTACTATCAGAGCCAGCAGGCCTCTGGCTTTGTCCGTGATCTCAGCGGGCACGTGGTGAGTCACCCCGGGCCAGCCACCGAGTGTAAGATCCCTGTGGTTGGT
ZNF365	10	64158396	64158579	ZNF365_11	184	32	CCCTTAATGGGAATGCAGTTTTT	ACAAACATTATCAAATGGCCCAAG	CCCTTAATGGGAATGCAGTTTTTAGAAAGTATAAGAAATATTTTAAAAACCAAATCCAGTCCTCAAATGCAGTTAACATTTTTTCTTATTTGTTTTCCTTCAGCTTACAGACATCTCCTCAAATAGGAAGCCCAAATGCCTGTATGTATGTATTTTTATACTTGGGCCATTTGATAATGTTTGT
ZNF365	10	64159173	64159369	ZNF365_12	197	47	CACCACTGTAGCATGTAGGAGAG	TTTTCAGGTGGTTCCTTCCCTTT	CACCACTGTAGCATGTAGGAGAGATTGTGCCATGAGTAATTATTCTTTTAAGGTTTTAAAGAAATCTTTCTTTCTGCTCATCTCTTCTCCACTCCCCCCTCCAACCCTCTGTAGAAGCCGAGGGCACCCGCATTCGGTATGTAACCACCCTGATCTCAAGGCCCATTTCCACCCAAAGGGAAGGAACCACCTGAAAA
ZNF365	10	64159307	64159506	ZNF365_13	200	56	CGGTATGTAACCACCCTGATCTC	TTTGGGCCTGATGTTGCCTTT	CGGTATGTAACCACCCTGATCTCAAGGCCCATTTCCACCCAAAGGGAAGGAACCACCTGAAAAAGGCCAAGGATGACAGAGCCAGCATGCAGCCTGCCAAGGCCATTCACGAACAGGCTGAGTCCTCAAGAGACCTCTGCAGACCTCCAAAGAAAGGGGAGCTCCTGGGGTTTGGCCGCAAAGGCAACATCAGGCCCAAA
ZNF365	10	64159403	64159587	ZNF365_14	185	52	CCAAGGCCATTCACGAACAGG	CAAAGCCCAGCGATGATTGGTC	CCAAGGCCATTCACGAACAGGCTGAGTCCTCAAGAGACCTCTGCAGACCTCCAAAGAAAGGGGAGCTCCTGGGGTTTGGCCGCAAAGGCAACATCAGGCCCAAAATGGCTAAAAAAAAGCCAACAGCCATTGTGAACATCATCTAAAAGGGTGGGTGGTGCTGGACCAATCATCGCTGGGCTTTG
ZNF365	10	64219421	64219601	ZNF365_15	181	50	TGCTTGTAGTCTTGCTGTGACTT	TTATTGTAACCAGGCCCAACCC	TGCTTGTAGTCTTGCTGTGACTTATTCAGTCTACACACTAGCTCCATTCATGATGGCAGTACCCTTCTTTTCCTTTCAGAGCTGGAAAGGTGCTGGCGAAGCTCGCCTGGTGTGCCAAAATGACCTGGAATTGGAGGTAAAGCCACCACCTGGGTGGGTGGGTTGGGCCTGGTTACAATAA
ZNF365	10	64239497	64239692	ZNF365_16	196	42	CAGCACATAAGTGAAGAGTTGCC	CCAAGTCCTCATCCAGAATCACA	CAGCACATAAGTGAAGAGTTGCCAGTACAATTGTTTGCCAGGACCCATGGTTGAAACCACTTCTTTTTTTGACTATTGTTGCTGGCACCTAGATACCACTGCAACTCTACTAACTTTCCTTTTGGCTTTTATGACTAGGAGTCTGCGATTGTGGAATAATGAACTTCGAATGATGTGATTCTGGATGAGGACTTGG
ZNF365	10	64382788	64382980	ZNF365_17	193	37	TCTGGCATTTGGTGATGAAGAAT	TTCCGAGAATCCAGAGAAAGCTG	TCTGGCATTTGGTGATGAAGAATATTTGTGGTTGTATTACCTAGTTATTTTTGCTATTTATTTATTTGTTTTTAGATTTTTGGCCATATAAACCACCATCTTTCGGGGTTGAAAGATTCTCATTGTCTAGTTTTTCTGCAAGCCCCACCTGTGCCCTGGATCATTTTAGCCAGCTTTCTCTGGATTCTCGGAA
ZNF365	10	64382876	64383055	ZNF365_18	180	48	TAAACCACCATCTTTCGGGGTTG	TCTTTACTTAAGCCGCATGACCA	TAAACCACCATCTTTCGGGGTTGAAAGATTCTCATTGTCTAGTTTTTCTGCAAGCCCCACCTGTGCCCTGGATCATTTTAGCCAGCTTTCTCTGGATTCTCGGAAATCCCTGGACGTCTTCCACGGCTACTGCAGGTGAATACTCGAGTGATGTGCATGGTCATGCGGCTTAAGTAAAGA
ZNF365	10	64403632	64403821	ZNF365_19	190	46	AAAGAGCATTCCATCATGACCCT	CCTCAACCCTACTCTCAGAAGAC	AAAGAGCATTCCATCATGACCCTTGGACTGGGTGAGAGCATCATCCTTTAATTAATGTCTGCGCTGGGTCAGATAACCATCACTGTCTCCAGGTAAATTCCCTTCTGTCTCTAAATGAATGGGTAGTTCAAGGGCATGAGTCGCAAAGGATCCTCTCAGTGGAAAGAGTCTTCTGAGAGTAGGGTTGAGG
ZNF365	10	64414549	64414736	ZNF365_20	188	43	CACTGCGCATGGATCAACAT	TTAGCGCACTCCACCTTACAATC	cactgcgcATGGAtcaacatgttgttattgagcactagctacttattattctaggtgctggaatacagagaggaaccaaacagataaaaatccttgcctgcacggagcttaccttcagctaagggagacagtcaaaaacaaggtaagtcagtattatgcataggagattgtaaggtggagtgcgctaa
ZNF365	10	64415053	64415251	ZNF365_21	199	48	ggATTGGCTGACATTGGTACTTACT	GATGAATTACCTGACTGCCAACG	ggATTGGCTGACATTGGTACTTACTGAAGAAAACCCCTCCCTATGTTCCTGTTAACTGGGGTTCTTCCACAAAGTCAACACATCTAAAGAAGCCACTGATGAAACAGGCTCCCCCTTGGAAAGACCATCTCACCTTCCAACCTCTCCATCCTGCAGAGAGGAAAACCCAAGTTTGGCGTTGGCAGTCAGGTAATTCATC
ZNF365	10	64415138	64415326	ZNF365_22	189	51	AAAGAAGCCACTGATGAAACAGG	GCAAGTGTATTCAGCACAACGTC	AAAGAAGCCACTGATGAAACAGGCTCCCCCTTGGAAAGACCATCTCACCTTCCAACCTCTCCATCCTGCAGAGAGGAAAACCCAAGTTTGGCGTTGGCAGTCAGGTAATTCATCAGATCTGGAAACCACCTCATCAGCATCCCCCTGGCCAACTGGAAGCAACCGTGACGTTGTGCTGAATACACTTGC
ZNF365	10	64415253	64415437	ZNF365_23	185	51	GATCTGGAAACCACCTCATCAGC	AATAGGTCTGGTTCTGAGTCTGC	GATCTGGAAACCACCTCATCAGCATCCCCCTGGCCAACTGGAAGCAACCGTGACGTTGTGCTGAATACACTTGCAGAGTCGTGCTGTGGTCTCTCCGAGCTCATCACGGCACCTCCCTATGCAGGAGTTTCAATTCAAGGTCATTTTTGGTTCCTTTCAGTAGCAGACTCAGAACCAGACCTATT
ZNF365	10	64416117	64416316	ZNF365_24	200	43	ATCATGAGAATTCAATGTGGTCATTT	GCACCTGGAAAATACCTGGA	atcatgagaattcaatgTGGTCATTTAATTCtgtttcaggatttagccaaatttgggtgctatttcccttttgtggagggacttttcatcacaatgagaaggacgtcttaggactccaggactttgagaggtgggtgtccaaaacatgtggttgtctctgcatttccactcaaagcagaatccaggtattttccaggtgc
ZNF365	10	64425830	64426018	ZNF365_25	189	40	GGCTTCAAAAAAGAGGCAACACA	GGTGTACATGAGGAGGACAAGAC	GGCTTCAAAAAAGAGGCAACACAGGCTCTGTGTTCATCTCTATCCCTGTATCTCTGCAGAGAAAGTGTCTCTACAAGTCAAAGCAGGAATATCAGCCTTCTTACACTAGGACAACTCCAAAATTGTGTGATTGGTAAGAATTTTTTTTAACTTTCCTATATTTGATGTCTTGTCCTCCTCATGTACACC
ZNF365	10	64429902	64430097	ZNF365_26	196	40	TGGGCTTTAAACAAGGAACTCCA	ACACTGTCTTTTTCACCTGTTTTCTT	TGGGCTTTAAACAAGGAACTCCAGTTATTGAATCTAATCTTTCTCCCTTTTCTCTGTCTTCATAGGCAAATTGACAATCATCGATTTGTTGACTGAACACCTGTTAGGTGTAAGGCACGGTGTCATATGCTTTCCTTGGGGCTTGCCTTCAAGCAGCTAACAGAAATAAGAAGAAAACAGGTGAAAAAGACAGTGT
NRBF2	10	64893100	64893289	NRBF2_1	190	63	CCTATCGCTGGCTCTTGGG	ACGAACGCTATATTCTGTGGGAC	CCTATCGCTGGCTCTTGGGGCGCAGAGAGGGGCCGCAGTCTCCGCGGCTGCGTCGAGCTCCCTTGCAGTCCCCTCCATGTTCCCCGGCGCCACTACTCCCCTTCCTAAGGCCGCCGCTTACCCCGGGGTCTATGGAAGTAATGGAAGGACCCCTCAACCTGGTGAGTGTCCCACAGAATATAGCGTTCGT
NRBF2	10	64905934	64906113	NRBF2_2	180	41	TGATCCAGAGGAACTTAGGGATGT	ATTACTATTGTGACTTTCTGCTCTTCA	TGATCCAGAGGAACTTAGGGATGTTTGTCTTCTAGGCTCATCAACAGAGCAGACGAGCAGACCGTTTATTAGCTGCAGGCAAATACGAAGAGGCTATTTCTTGTCACAAAAAGGCTGCAGGTGAGTATTCTTATTAAGTACTCAGTGTAAAACTGAAGAGCAGAAAGTCACAATAGTAAT
NRBF2	10	64911795	64911991	NRBF2_3	197	36	TCAGAGTTATCAGACCAGTTCTCTTT	CCTTTCTAACCCTTGTCGCAAAT	TCAGAGTTATCAGACCAGTTCTCTTTGTCATATGAAGATTATTAAAACTCTTCCTTTTACCTGTTAATTACAAAATGAAGACACATATTAACATGCCTATTTTTTCTCTTAACAGCATATCTTTCTGAAGCCATGAAGCTGACACAGTCAGAGCAGGTGAGACATATTCCCAATATTTGCGACAAGGGTTAGAAAGG
NRBF2	10	64913171	64913369	NRBF2_4	199	37	AGTGTTGGGTTATTCACAAAGGA	TTTCAATCTTTCTTCACGCTGGG	AGTGTTGGGTTATTCACAAAGGATTTTGAATAGTGTATGTTGGACATTACTAAGATACTTAAAATATTCTTCCAATTTTATCTTTCCTTCTATGTAATAGGCTCATCTTTCACTGGAATTGCAAAGGGATAGCCATATGAAACAGCTCCTCCTCATCCAAGAGAGATGGAAAAGGGCCCAGCGTGAAGAAAGATTGAAA
NRBF2	10	64913309	64913506	NRBF2_5	198	52	GAAACAGCTCCTCCTCATCCAAG	TGAATCTCAGGCAGGCATTTCTC	GAAACAGCTCCTCCTCATCCAAGAGAGATGGAAAAGGGCCCAGCGTGAAGAAAGATTGAAAGCCCAGCAGAACACAGACAAGGATGCAGCTGCCCATCTTCAGACATCTCACAAACCCTCTGCAGAGGATGCAGAGGGCCAGAGTCCCCTTTCTCAGAAGTACAGCCCTTCCACAGAGAAATGCCTGCCTGAGATTCA
NRBF2	10	64913408	64913600	NRBF2_6	193	49	TCAGACATCTCACAAACCCTCTG	TTTTGGGGCTTTGCTTCCAATAC	TCAGACATCTCACAAACCCTCTGCAGAGGATGCAGAGGGCCAGAGTCCCCTTTCTCAGAAGTACAGCCCTTCCACAGAGAAATGCCTGCCTGAGATTCAGGGGATCTTTGACAGGGATCCAGACACACTACTTTATTTACTTCAGCAAAAGAGTGAGCCAGCAGAGCCATGTATTGGAAGCAAAGCCCCAAAA
NRBF2	10	64913518	64913707	NRBF2_7	190	39	ACAGGGATCCAGACACACTACTT	TGTTTATTTTCTTTCCTTAATCTTTCATTCTCA	ACAGGGATCCAGACACACTACTTTATTTACTTCAGCAAAAGAGTGAGCCAGCAGAGCCATGTATTGGAAGCAAAGCCCCAAAAGATGATAAAACAATTATAGAGGAGCAGGCAACCAAAATTGCAGATTTGAAGAGGCATGTGGAATTCCTTGTGGCTGAGAATGAAAGATTAAGGAAAGAAAATAAACA
NRBF2	10	64913581	64913775	NRBF2_8	195	38	TTGGAAGCAAAGCCCCAAAAGAT	AATCAGCATCTACATCCAGCTCC	TTGGAAGCAAAGCCCCAAAAGATGATAAAACAATTATAGAGGAGCAGGCAACCAAAATTGCAGATTTGAAGAGGCATGTGGAATTCCTTGTGGCTGAGAATGAAAGATTAAGGAAAGAAAATAAACAACTAAAGGCTGAAAAGGCCAGACTTCTAAAAGGTCCAATAGAAAAGGAGCTGGATGTAGATGCTGATT
NRBF2	10	64913710	64913900	NRBF2_9	191	46	TAAAGGCTGAAAAGGCCAGACTTC	AGGAAGATTGGGGATTGGAATG	TAAAGGCTGAAAAGGCCAGACTTCTAAAAGGTCCAATAGAAAAGGAGCTGGATGTAGATGCTGATTTTGTAGAAACGTCAGAGTTATGGAGCTTGCCACCACATGCAGAAACTGCTACAGCCTCCTCAACCTGGCAGAAGTTCGCAGCAAATACTGGGAAAGCCAAGGACATTCCAATCCCCAATCTTCCT
NRBF2	10	64913819	64914005	NRBF2_10	187	44	AACTGCTACAGCCTCCTCAACC	TTTTCCCCTTTTCTGTGGCCTTC	AACTGCTACAGCCTCCTCAACCTGGCAGAAGTTCGCAGCAAATACTGGGAAAGCCAAGGACATTCCAATCCCCAATCTTCCTCCCTTGGATTTTCCATCTCCAGAACTTCCTCTTATGGAGCTCTCTGAGGATATTCTGAAAGGATTTATGAATAATTAAAATGGAAGGCCACAGAAAAGGGGAAAA
CCND1	11	69456030	69456226	CCND1_1	197	66	GACCCAGCCAGGACCC	GCACACATTTGAAGTAGGACACC	GACCCAGCCAGGACCCACAGCCCTCCCCAGCTGCCCAGGAAGAGCCCCAGCCATGGAACACCAGCTCCTGTGCTGCGAAGTGGAAACCATCCGCCGCGCGTACCCCGATGCCAACCTCCTCAACGACCGGGTGCTGCGGGCCATGCTGAAGGCGGAGGAGACCTGCGCGCCCTCGGTGTCCTACTTCAAATGTGTGC
CCND1	11	69456128	69456307	CCND1_2	180	64	CGTACCCCGATGCCAACC	CTTAAGAGAGCCGCCCGAAG	CGTACCCCGATGCCAACCTCCTCAACGACCGGGTGCTGCGGGCCATGCTGAAGGCGGAGGAGACCTGCGCGCCCTCGGTGTCCTACTTCAAATGTGTGCAGAAGGAGGTCCTGCCGTCCATGCGGAAGATCGTCGCCACCTGGATGCTGGAGGTGCGGGGCTTCGGGCGGCTCTCTTAAG
CCND1	11	69457712	69457900	CCND1_3	189	71	CCCTGCCAAGCGCGATG	CTGCAGGCGGCTCTTTTTCA	CCCTGCCAAGCGCGATGGGGGGTGCGGGGGCGTGCGGGGGGGCGGCGCGACCTGGCGGCGGCGGTCACGGGCCCCGTGCCTCCGTAGGTCTGCGAGGAACAGAAGTGCGAGGAGGAGGTCTTCCCGCTGGCCATGAACTACCTGGACCGCTTCCTGTCGCTGGAGCCCGTGAAAAAGAGCCGCCTGCAG
CCND1	11	69457796	69457995	CCND1_4	200	60	TAGGTCTGCGAGGAACAGAAGTG	ATGGAGTTGTCGGTGTAGATGC	TAGGTCTGCGAGGAACAGAAGTGCGAGGAGGAGGTCTTCCCGCTGGCCATGAACTACCTGGACCGCTTCCTGTCGCTGGAGCCCGTGAAAAAGAGCCGCCTGCAGCTGCTGGGGGCCACTTGCATGTTCGTGGCCTCTAAGATGAAGGAGACCATCCCCCTGACGGCCGAGAAGCTGTGCATCTACACCGACAACTCCAT
CCND1	11	69457914	69458093	CCND1_5	180	68	CTTGCATGTTCGTGGCCTCT	CACCGCCTGCACCTTCC	CTTGCATGTTCGTGGCCTCTAAGATGAAGGAGACCATCCCCCTGACGGCCGAGAAGCTGTGCATCTACACCGACAACTCCATCCGGCCCGAGGAGCTGCTGGTAACCACTGGAccccgccgccccccgccccccgcgAGCCGCACGCAGGACCACGGGGCCGGGGAAGGTGCAGGCGGTG
CCND1	11	69458527	69458722	CCND1_6	196	62	CGTGCTGCCGGCTTCC	GCGGATGATCTGTTTGTTCTCCT	CGTGCTGCCGGCTTCCCCGCGCCCCCGGGCTGGCCCGCACCTCCCCTGATGGCCGCTCACCCTGTGTTCGCAGCAAATGGAGCTGCTCCTGGTGAACAAGCTCAAGTGGAACCTGGCCGCAATGACCCCGCACGATTTCATTGAACACTTCCTCTCCAAAATGCCAGAGGCGGAGGAGAACAAACAGATCATCCGC
CCND1	11	69458648	69458842	CCND1_7	195	61	ATGACCCCGCACGATTTCATT	CAGGTGGAGAGCAAGAAGCC	ATGACCCCGCACGATTTCATTGAACACTTCCTCTCCAAAATGCCAGAGGCGGAGGAGAACAAACAGATCATCCGCAAACACGCGCAGACCTTCGTTGCCCTCTGTGCCACAGGTAGGGCAGGCCCGGCAGCCCCCGGCCTCCCCTTGAGAGCCGGCTCCTTAGGTGACCCTGGCCGGCTTCTTGCTCTCCACCTG
CCND1	11	69462715	69462909	CCND1_8	195	60	GAGGGTCCCCTGCTCAC	GGGTCACACTTGATCACTCTGG	GAGGGTCCCCTGCTCACAGCCTCCTTCCCTCTCTCCTTCTGCCTCAGATGTGAAGTTCATTTCCAATCCGCCCTCCATGGTGGCAGCGGGGAGCGTGGTGGCCGCAGTGCAAGGCCTGAACCTGAGGAGCCCCAACAACTTCCTGTCCTACTACCGCCTCACACGCTTCCTCTCCAGAGTGATCAAGTGTGACCC
CCND1	11	69462792	69462941	CCND1_9	150	61	TGGTGGCAGCGGGGAG	CAAGGCTGCCTGGGACATC	TGGTGGCAGCGGGGAGCGTGGTGGCCGCAGTGCAAGGCCTGAACCTGAGGAGCCCCAACAACTTCCTGTCCTACTACCGCCTCACACGCTTCCTCTCCAGAGTGATCAAGTGTGACCCGGTAAGTGAGGGTGATGTCCCAGGCAGCCTTG
CCND1	11	69465836	69466030	CCND1_10	195	66	CCCTTCTAAGGACCCCCTCT	CGTCGGTGGGTGTGCAAG	CCCTTCTAAGGACCCCCTCTTCCCACCTCTCCCCACCCTCTCTCTCTCAGGACTGCCTCCGGGCCTGCCAGGAGCAGATCGAAGCCCTGCTGGAGTCAAGCCTGCGCCAGGCCCAGCAGAACATGGACCCCAAGGCCGCCgaggaggaggaagaggaggaggaggaggtggaCCTGGCTTGCACACCCACCGACG
CCND1	11	69465949	69466137	CCND1_11	189	71	CAGCAGAACATGGACCCCAA	TCCGGAGAGGAGGGACTG	CAGCAGAACATGGACCCCAAGGCCGCCgaggaggaggaagaggaggaggaggaggtggaCCTGGCTTGCACACCCACCGACGTGCGGGACGTGGACATCTGAGGGCGCCAGGCAGGCGGGCGCCACCGCCACCCGCAGCGAGGGCGGAGCCGGCCCCAGGTGCTCCCCTGACAGTCCCTCCTCTCCGGA
TBX3	12	115109567	115109766	TBX3_1	200	60	CCCGTGGTTTATTTTATATCCGACAA	GTCCTTGTCGCCCAAACTCT	CCCGTGGTTTATTTTATATCCGACAAAGTGCACGGCAGCCTGAACTGGACTGGAATGAAAAGACGTGTCTGGGACGGGTCTACGGGGACGCGCTGCGGGACCTGTCCGGCTTGGCTTCCAAGCCGCTAACCAACCGCTGGATGCTCTGCAGTTCGCTGGTGGCCGCCTCTTTCTCCGCGCAGAGTTTGGGCGACAAGGAC
TBX3	12	115109681	115109873	TBX3_2	193	66	CTTCCAAGCCGCTAACCAACC	CCCCTGGACGGCAAAGTC	CTTCCAAGCCGCTAACCAACCGCTGGATGCTCTGCAGTTCGCTGGTGGCCGCCTCTTTCTCCGCGCAGAGTTTGGGCGACAAGGACATGGAGCTGGAGGAGAGCGTGGAGGAGCGGCTGTTGAGTTCAGAGCCCGAGTCCACTGCCACCGAGGCCGGGCTGGCGGCCAGGGCGGCGACTTTGCCGTCCAGGGG
TBX3	12	115109814	115110004	TBX3_3	191	74	CGAGTCCACTGCCACCGA	GCCACCCCTTCCTCAATCTG	CGAGTCCACTGCCACCGAGGCCGGGCTGGCGGCCAGGGCGGCGACTTTGCCGTCCAGGGGCCCCGCGGCCGCCGCCATGGAGGGCAGGGCGGTGGTGAGCAGACTGCTGCCGTCCGGGACCGGCACCGGGATGGAGTAGGGGCTGTAGCGCAGCCGCGGGCGCATGGTGTTCAGATTGAGGAAGGGGTGGC
TBX3	12	115109944	115110136	TBX3_4	193	65	ATGGAGTAGGGGCTGTAGCG	CTCGCTGTGTGTCTCTTTTCTCA	ATGGAGTAGGGGCTGTAGCGCAGCCGCGGGCGCATGGTGTTCAGATTGAGGAAGGGGTGGCGGTGCACCGAGCTGGAGGCTGCCGCAGAGGAGGCGGCCGCCGCTGCGGCCATGTACGTGTAGGGGTAAGGGAACAGGCTTCCGAAAGGGGACATGGCCAGGCCCTGGGGTGAGAAAAGAGACACACAGCGAG
TBX3	12	115111917	115112113	TBX3_5	197	66	GAAACTGGACGAAAGGTGGAAAG	CTGGCCACGGTTTCTGGG	GAAACTGGACGAAAGGTGGAAAGACTGGTGGAGGCAGGAAGAAGGATCCATACCTGAGAGGCCAGGACGTGCTGCTGGAGGTGGAAGGGCAGGGTGGCCGCGGACGCCCCGGACAGTCCCTGCGCCGCAGCGGCAGAGGCCATGGCCGTGGAATCCAGGCCCGAGACACCGGTGGAGGCCCCAGAAACCGTGGCCAG
TBX3	12	115111985	115112177	TBX3_6	193	73	GTGCTGCTGGAGGTGGAA	CCCCAGCCAGTTTGCCAT	GTGCTGCTGGAGGTGGAAGGGCAGGGTGGCCGCGGACGCCCCGGACAGTCCCTGCGCCGCAGCGGCAGAGGCCATGGCCGTGGAATCCAGGCCCGAGACACCGGTGGAGGCCCCAGAAACCGTGGCCAGGAGGGGACCCATGCCAGCGGCCGCCATGCTGGAGAAGGCGCCCCCCATGGCAAACTGGCTGGGG
TBX3	12	115112100	115112297	TBX3_7	198	73	GAAACCGTGGCCAGGAGG	GCTCACGGTGCAGACG	GAAACCGTGGCCAGGAGGGGACCCATGCCAGCGGCCGCCATGCTGGAGAAGGCGCCCCCCATGGCAAACTGGCTGGGGTGCAGGAAGAGCGGGTGCCCGTTGAAGAACTGTTGGCCCGCCAGGCCCGGGGCGAAGCCGAGGCCAGGCAGGGGGCCCTGGGCCAGGTGCGCGGCGGCCGCGTCCGTCTGCACCGTGAGC
TBX3	12	115112190	115112386	TBX3_8	197	77	GGGTGCCCGTTGAAGAACT	GAGGAGCGCAGGAGCC	GGGTGCCCGTTGAAGAACTGTTGGCCCGCCAGGCCCGGGGCGAAGCCGAGGCCAGGCAGGGGGCCCTGGGCCAGGTGCGCGGCGGCCGCGTCCGTCTGCACCGTGAGCGGCGCGAAGGCCTCCTTGCCCGGGAGCGCGCGCGCCTCTTCCACCTTGGCCGGCGCTGTGCCCTCGCGAACCGGGCTCCTGCGCTCCTC
TBX3	12	115112302	115112500	TBX3_9	199	73	CGAAGGCCTCCTTGCC	GCTCACCTTTTCGCTGCTG	CGAAGGCCTCCTTGCCCGGGAGCGCGCGCGCCTCTTCCACCTTGGCCGGCGCTGTGCCCTCGCGAACCGGGCTCCTGCGCTCCTCCGCGCCCAGGCCGCGAGTGCTGGACGAGATGGTGGCGGGGCTATGGCGTGAGTCGGGCGACGCTTTGTCCAGCCGCCCGCTGTCCCGGGGCCGCTCAGCAGCGAAAAGGTGAGC
TBX3	12	115112412	115112604	TBX3_10	193	69	GAGATGGTGGCGGGGCTAT	CCGAGAGCAAAGAGGAGCAT	GAGATGGTGGCGGGGCTATGGCGTGAGTCGGGCGACGCTTTGTCCAGCCGCCCGCTGTCCCGGGGCCGCTCAGCAGCGAAAAGGTGAGCCTTGACCGCGGGGCTGCCCTTGTCACGGCAGGGCTCCTCCGACGTGGTGGTGGAGATCTTGGCCGCGTCGCAGGCCTCGGGGCCATGCTCCTCTTTGCTCTCGG
TBX3	12	115112485	115112673	TBX3_11	189	63	CAGCGAAAAGGTGAGCCTTGA	TTCTGCCTTGGTTTTTTCCTTCG	CAGCGAAAAGGTGAGCCTTGACCGCGGGGCTGCCCTTGTCACGGCAGGGCTCCTCCGACGTGGTGGTGGAGATCTTGGCCGCGTCGCAGGCCTCGGGGCCATGCTCCTCTTTGCTCTCGGCCTCGGCGTCGCTCTCACCCTCGCTGGGACATAAATCTACCACAGGCGAAGGAAAAAACCAAGGCAGAA
TBX3	12	115114049	115114233	TBX3_12	185	53	CATCCCCCTTCAACTCTTCCAG	ACACAAAAAGGAGAATGGGACCT	CATCCCCCTTCAACTCTTCCAGGCCACGAGGGACTGGAGTCCAGTGATCACAAAGGTGACATGGTTTACCTTTGAGGTTCGATGTCCCTACAGTGGAGGCGGCTGGAGAAGAAGCCTGGGCGAAGCAGTTGAAAGCTGCTTGTTCACTGGAGGACTCATCAGAGGTCCCATTCTCCTTTTTGTGT
TBX3	12	115114116	115114309	TBX3_13	194	52	ACCTTTGAGGTTCGATGTCCCTA	CATTCTGTAACCTGGGTGTGGG	ACCTTTGAGGTTCGATGTCCCTACAGTGGAGGCGGCTGGAGAAGAAGCCTGGGCGAAGCAGTTGAAAGCTGCTTGTTCACTGGAGGACTCATCAGAGGTCCCATTCTCCTTTTTGTGTCTTTCATCAAACACCCTCATGGACTGCAGGGTGAGCTGTTTTCTGTGGCAGAAGCCCACACCCAGGTTACAGAATG
TBX3	12	115115294	115115489	TBX3_14	196	37	AGTGCCTGCATCTCACTTCTAAC	TCTGTCTTGCTTGTGTCTCTTCC	AGTGCCTGCATCTCACTTCTAACACTTCAGAGTTGGATCCTAAAAAAAGGGATTTTTCTAAACTATCTAATAAATAATTGTTTCAACTCACCTTTTTTCTCTTCGGCCATTTCCAGTGTCCCGGAAACCTTTTGCAAAAGGGTTGTTGTCTATTTTTAACTGGGTTATCTATTGGAAGAGACACAAGCAAGACAGA
TBX3	12	115117252	115117449	TBX3_15	198	42	CAGCTTTTAAGGGGAAGGCAAAA	TGAACTCCATGCACAAATACCAG	CAGCTTTTAAGGGGAAGGCAAAATATCACCATTAAAAAGGAAAGCCCCTTGAGTTTACCTTATCATTCTGGTATGCAGTCACAGCGATGAATTCAGTTTCGGGGAACAAGTATGTCCGAAATGTACTATAAGGGAGTTTCAAGATGTCATTGGCTCTTACAATGTGGAACCGGGGCTGGTATTTGTGCATGGAGTTCA
TBX3	12	115117294	115117492	TBX3_16	199	44	AGCCCCTTGAGTTTACCTTATCA	TGTTTTATGTATGTCTCCTCTTCCCT	AGCCCCTTGAGTTTACCTTATCATTCTGGTATGCAGTCACAGCGATGAATTCAGTTTCGGGGAACAAGTATGTCCGAAATGTACTATAAGGGAGTTTCAAGATGTCATTGGCTCTTACAATGTGGAACCGGGGCTGGTATTTGTGCATGGAGTTCAATATAGTCTGCAGGGGCAGGGAAGAGGAGACATACATAAAACA
TBX3	12	115117668	115117867	TBX3_17	200	42	CCCCCACCCTCACCATCTAA	TTTAAGTGGATTGGGCTCGTCAA	CCCCCACCCTCACCATCTAAGGATCATTCATACCTTGAACCCTAGCCTACCTGAGTACCAAAACTATAATTCCCCTGCCACGTAGCGTGATCACTTGGGAAGGCCAAAGTCTTAAAAGATAGAGAAAAACATGCATTTTAATTTACAAAATGATTCAGTACTTTAAGCGCCCACTAATTGACGAGCCCAATCCACTTAAA
TBX3	12	115118629	115118810	TBX3_18	182	45	CCTTTGACTGAGTGAAGGAGGAG	CCCCGAAATGCCAAAGAGGAT	CCTTTGACTGAGTGAAGGAGGAGAAAATTTTACTGAAGAGAGCAATGAAACTTACAAATCCATGTTTGTCTGAAATGTTGTTGGTGAGTTTCAGTTTGTGGAAAGTGACGACTTTGGACATCCACTGTTCCCCAGTAGCGGGGCTGTCCGGGTGAATGTACATCCTCTTTGGCATTTCGGGG
TBX3	12	115118727	115118923	TBX3_19	197	47	TGGAAAGTGACGACTTTGGACAT	TGTTCTGGGCTGGATAAAAAAGC	TGGAAAGTGACGACTTTGGACATCCACTGTTCCCCAGTAGCGGGGCTGTCCGGGTGAATGTACATCCTCTTTGGCATTTCGGGGTCGGCCTTACCAGCCACCATCCACCGAGAATTGTGAAATTTATAACGACAGTCATCAGCAGCTATAATGTCCATCAATAAAATGTATTTGGCTTTTTTATCCAGCCCAGAACA
TBX3	12	115118827	115119026	TBX3_20	200	35	CCATCCACCGAGAATTGTGAAA	TGATACATAGGAAATCAAACCCAAGA	CCATCCACCGAGAATTGTGAAATTTATAACGACAGTCATCAGCAGCTATAATGTCCATCAATAAAATGTATTTGGCTTTTTTATCCAGCCCAGAACATCTCACTTTAAATGGAGGAAACATTCGCCTATAAAACGAAAGAATAGAAAAGAAAAAGAAAGATAAACCACCCGTAATCTTGGGTTTGATTTCCTATGTATCA
TBX3	12	115120547	115120745	TBX3_21	199	55	CTGGGAGCAGAGAAATAAAGGGA	GAGGCCTTTGAAGACCATGGAG	CTGGGAGCAGAGAAATAAAGGGAGGAAAAAACTCTCCAACAGCTTAGGGGAGGAGGCCCCCACTGCTTACCTTCCCGACTTGGTAATGACCATCTCGGTGCCCCGCTTGTGAAACTGATCCCAAAGTTCTTTAGCCTCCAGGTGCACCTTGGGGTCGTCCTCCACCTCTTCTTCGGGCTCCATGGTCTTCAAAGGCCTC
TBX3	12	115120699	115120889	TBX3_22	191	69	GGTCGTCCTCCACCTCTTCTTC	GTTCTTCCCCGCGCTGAC	GGTCGTCCTCCACCTCTTCTTCGGGCTCCATGGTCTTCAAAGGCCTCAGATGCGCCTGGGGCCCCAGGGAGGAGAACGGGATGCCGGTCTCGGCCGCCCCCACCAATTGATCCATGATCGGCTTGGCCAGGGCGCCCGGCAGCGAGAGCGCCGCCGCGCCGTTGGGAGGCAGCGTCAGCGCGGGGAAGAAC
TBX3	12	115120800	115120996	TBX3_23	197	67	ACCAATTGATCCATGATCGGCTT	TCCATGAGAGATCCGGTCATTCC	ACCAATTGATCCATGATCGGCTTGGCCAGGGCGCCCGGCAGCGAGAGCGCCGCCGCGCCGTTGGGAGGCAGCGTCAGCGCGGGGAAGAACGGCGGCTGGTGACCCAGCACCGCGCTCATGGCGAAGTCCGGCGCCCGGTGAGGTAGGAACGGATGGTAGGCCATGCTTGTCCCAGGAATGACCGGATCTCTCATGGA
TBX3	12	115120940	115121125	TBX3_24	186	52	AGGTAGGAACGGATGGTAGGC	TGTTTTGCTTTTTCCCCCCTTTT	AGGTAGGAACGGATGGTAGGCCATGCTTGTCCCAGGAATGACCGGATCTCTCATGGAGAGGCTCATCCACTCCAGGCGGGGCGCTGGGCTCCAGCCGGGGACAAGTCCGCAGCTGCTGTGTTTTGTTGTTTTTTTGTTGTTGTTTAACAGCAGCACATAATTCAAAAGGGGGGAAAAAGCAAAACA
PTHLH	12	28111368	28111549	PTHLH_1	182	35	GGGGAGACAGTTTTATTCCAATGC	GAAAACTAACCTGTTTTCTCCTTTTCT	GGGGAGACAGTTTTATTCCAATGCATTTACAGTATTTACAGACAATAAATATTTCTAATACTTTCCATATGTTCACTATTACAGAATCCTGCAATATGTCCTTGGAAGGTCTCTGCTGAAAATTTCAATGCCTCCTGCAAAAAGAAGGAAGAGAAAGAAAAGGAGAAAACAGGTTAGTTTTC
PTHLH	12	28116213	28116408	PTHLH_2	196	59	CAGAAGGGAGGCTCCAAAACC	CGCAAGGAGCAGGAAAAGAAAAA	CAGAAGGGAGGCTCCAAAACCCAGCTGAGAGCACCCCGCTGAGGCTACGGGCCAGAGAAGCCTGTTACCGTGAATCGAGCTCCAGCGACGTTGTGGAGGTGTCAGACAGGTGGTCCCCTTCTAGCCCACTCCCAGTCACTCCAGAGTCTAACCAGGCAGAGCGAGTTCGCCGTTTTTTCTTTTCCTGCTCCTTGCG
PTHLH	12	28116265	28116451	PTHLH_3	187	55	CAGAGAAGCCTGTTACCGTGAAT	GCTCAAGACACCTGGGAAGAAAA	CAGAGAAGCCTGTTACCGTGAATCGAGCTCCAGCGACGTTGTGGAGGTGTCAGACAGGTGGTCCCCTTCTAGCCCACTCCCAGTCACTCCAGAGTCTAACCAGGCAGAGCGAGTTCGCCGTTTTTTCTTTTCCTGCTCCTTGCGTTTCCCGGGCTTGCCTTTCTTTTTCTTCCCAGGTGTCTTGAGC
PTHLH	12	28116382	28116566	PTHLH_4	185	51	CCGTTTTTTCTTTTCCTGCTCCT	CTAACTCCAAGCCCTCTCCCAAC	CCGTTTTTTCTTTTCCTGCTCCTTGCGTTTCCCGGGCTTGCCTTTCTTTTTCTTCCCAGGTGTCTTGAGCGGCTGCTCTTTGTACGTCTCCACCTTGTTAGTTTCCTGAGTTAGGTATCTGCCCTCATCATCAGACCCAAATCGGACGGGGTGGTTCTTTGTGTTGGGAGAGGGCTTGGAGTTAG
PTHLH	12	28116465	28116647	PTHLH_5	183	51	ACGTCTCCACCTTGTTAGTTTCC	ATTTACGGCGACGATTCTTCCTT	ACGTCTCCACCTTGTTAGTTTCCTGAGTTAGGTATCTGCCCTCATCATCAGACCCAAATCGGACGGGGTGGTTCTTTGTGTTGGGAGAGGGCTTGGAGTTAGGGGACACCTCCGAGGTAGCTCTGATTTCAGCTGTGTGGATTTCTGCGATCAGATGGTGAAGGAAGAATCGTCGCCGTAAAT
PTHLH	12	28116556	28116749	PTHLH_6	194	44	CTTGGAGTTAGGGGACACCTCC	ACTAAAATTTAACTGTTTTCTTCCCCTCT	CTTGGAGTTAGGGGACACCTCCGAGGTAGCTCTGATTTCAGCTGTGTGGATTTCTGCGATCAGATGGTGAAGGAAGAATCGTCGCCGTAAATCTTGGATGGACTTCCCCTTGTCATGGAGGAGCTGATGTTCAGACACAGCTCTTTTGCTTTGAAAGAAAATATTAGAGGGGAAGAAAACAGTTAAATTTTAGT
PTHLH	12	28122265	28122463	PTHLH_7	199	71	GCTTGGCAGCCCCTCC	CCCTTCTGTTGCAGGTCCC	GCTTGGCAGCCCCTCCCCCTGGCCTCCCCAACCCGGCGCCCTGGGGAGGATGGGGCACTTACAGGCGGCGGCTGAGACCCTCCACCGAGCGCCCGCAGGAGGGCACCGCGTAGCTCAGCAGGAACACCGCGACGCTCCACTGCTGAACCAGTCTCCGCTGCATCGTCTCCGCTCGCGCTCGGGACCTGCAACAGAAGGG
NTN4	12	96052789	96052988	NTN4_1	200	38	TCTGAGGTCTTCTTGCTCTAAAGT	CCTTGTAGCAGGACATGAGGATA	TCTGAGGTCTTCTTGCTCTAAAGTTTGTGTTTTGTACATAGACAAGTGCCATTATGTGCTATCCATCTTAATGCTACTTGCACTCTCTTTTTAAAATATCCATGACTTTTCTTCCAAGAGAAGGTTTCCAGTGCTGGACAAAGCTTTTCATATTCACAATTAGTTTGCCTGTTCTTATATCCTCATGTCCTGCTACAAGG
NTN4	12	96052843	96053030	NTN4_2	188	36	TGTGCTATCCATCTTAATGCTACTT	ACTGTATAGCCCCTAATTTTGTTCT	TGTGCTATCCATCTTAATGCTACTTGCACTCTCTTTTTAAAATATCCATGACTTTTCTTCCAAGAGAAGGTTTCCAGTGCTGGACAAAGCTTTTCATATTCACAATTAGTTTGCCTGTTCTTATATCCTCATGTCCTGCTACAAGGTATTCCAAACCTAAAAAAGAACAAAATTAGGGGCTATACAGT
NTN4	12	96059514	96059710	NTN4_3	197	41	CAGAGGATGTAAGACAAGCAGCA	TGAGGTCAATGTGAAGATTAAAAAGGT	CAGAGGATGTAAGACAAGCAGCAAATCAGCAGAGACAAGGTAGGTACTAAGATAGGAAAGTCTAATACTCACCAGGATTGAGGATTGGACAAGTGCATCCTCTGTCCGTCCATGATTCTGGATATAATGTTCGCTTTCCTCGGAAAATCTTCAGTTTGGTAGATTTTAAGACCTTTTTAATCTTCACATTGACCTCA
NTN4	12	96059610	96059791	NTN4_4	182	34	ATCCTCTGTCCGTCCATGATTCT	TGAAATTCTATGCATTTTGACTTCTGTG	ATCCTCTGTCCGTCCATGATTCTGGATATAATGTTCGCTTTCCTCGGAAAATCTTCAGTTTGGTAGATTTTAAGACCTTTTTAATCTTCACATTGACCTCAACATGAGTACCTTTATCATGAGCTGATAAAATCTTTATTTTTAGCACTGTTAACACAGAAGTCAAAATGCATAGAATTTCA
NTN4	12	96063771	96063970	NTN4_5	200	35	CAGTCAGGCCTCCCATTTTCTTA	TCTTTGCTTTTCTAATAACTAACACCATT	CAGTCAGGCCTCCCATTTTCTTAAAAATTCTCTGAACTTAGTGTGAATAGGTTCTCAGAAGCATTCAAGGATTTCAGACTCACCATATGAATATTTCATTCCACAGAATGCCTTGGCATTTCCTAATGTCTGTTCCTTACATTCGCATTTACCTATGGAAAGTAAATTAAAAATGGTGTTAGTTATTAGAAAAGCAAAGA
NTN4	12	96076458	96076637	NTN4_6	180	47	TGATGCCTGGTTACATCCATCTC	ATTCCTGAATACGTTCTTTATCATGTTCT	TGATGCCTGGTTACATCCATCTCACCTGAGTGTAGAAGTGCAGAAAACCCCTGCGCATCCTCCCACTCCCAGGCTGGTTCGCTCTTATTGTGCACGGGACGGAAGTCAGGAACTTCATGATACCAGTCTATGTCTGTGTGGCTAACAAAATAGAACATGATAAAGAACGTATTCAGGAAT
NTN4	12	96077234	96077423	NTN4_7	190	58	GAAATACATGCAGCTGAGAGCAA	CAGCAATGGTGACTGCCCTT	GAAATACATGCAGCTGAGAGCAAGAGCCTTGCACATTCACCTGCTGATGCAGTCTCCGGTGATAGGGTCACAGCTCCCCGCACAGTCACATGGTCGACAGCCATAGTCTCCGAAGCCCCAGTATCCCACCATGCACCTGTCACAACGTCGCCCTGCCACCCCAGGCTTGCAAGGGCAGTCACCATTGCTG
NTN4	12	96077329	96077518	NTN4_8	190	58	GACAGCCATAGTCTCCGAAGC	CTTTGATCCTTGCGTGTCCTCTC	GACAGCCATAGTCTCCGAAGCCCCAGTATCCCACCATGCACCTGTCACAACGTCGCCCTGCCACCCCAGGCTTGCAAGGGCAGTCACCATTGCTGGGGTCGCAGAAGGTCACTGAGTTGGCAGGAAGGACAGCTGATCCTACTGGATGGCAGGAACACGCTACAACAGAGAGGACACGCAAGGATCAAAG
NTN4	12	96104139	96104337	NTN4_9	199	47	TTGGGTTAGCAGAATGAGGGATA	TAGTGGTGGTGTCTGTGATGACT	TTGGGTTAGCAGAATGAGGGATAAAGAGATTCATCTCTTGTACAAATCAGCCTATTTTCTGGAAACCACAGGTTACTTACGTTTGCAAGCATCTGGAGCTGAGAAGGGTCTCCGCAGGTCACGATAGAAGCCTGGCTTGCACCTCTGGCAATACTGTCCTTCTGTGTTGTGCTGACAGTCATCACAGACACCACCACTA
NTN4	12	96104246	96104438	NTN4_10	193	51	GTCTCCGCAGGTCACGATAG	TAGTGTTTCTCTCCACGCTTCTT	GTCTCCGCAGGTCACGATAGAAGCCTGGCTTGCACCTCTGGCAATACTGTCCTTCTGTGTTGTGCTGACAGTCATCACAGACACCACCACTACGATTCCCTGATGCCTCCCACACATTAACGTCGAAGTGACAGGTATCAGCATGCCCATTACACTTGCAGGCTGGAAATAAGAAGCGTGGAGAGAAACACTA
NTN4	12	96106918	96107103	NTN4_11	186	52	AGACAACAAGGAGTCCACAGATG	GTATGTGTAAGCACAACACAGCA	AGACAACAAGGAGTCCACAGATGCGTTGACTTTACAAAGAAAGCTTTTGAGTATCGTGGGCTTGTTACTTACTTCTGCACTCGTTGGGAGCCCCCGTTTTGCCATCAGCTGCCTCCCATGGCCGGTCATTGTATAACGGGGCACAGTGCTGGCAGTGGCTGCCTGCTGTGTTGTGCTTACACATAC
NTN4	12	96106983	96107169	NTN4_12	187	52	TACTTACTTCTGCACTCGTTGGG	GTTCTTCTTTGGCGACATGTGTG	TACTTACTTCTGCACTCGTTGGGAGCCCCCGTTTTGCCATCAGCTGCCTCCCATGGCCGGTCATTGTATAACGGGGCACAGTGCTGGCAGTGGCTGCCTGCTGTGTTGTGCTTACACATACACTTCCCATGGACCTACAAGCAACATCAAGTGAGAACTATGAGCACACATGTCGCCAAAGAAGAAC
NTN4	12	96131580	96131779	NTN4_13	200	45	CAATGCCCAAAGCTGAAGGTAA	AGAGCCTCAACATTTTACACACT	CAATGCCCAAAGCTGAAGGTAACTTATGATTTGTTTTTCTTAGGGGAGGACTTGTTTCACCTACCATGTGGAATGTTCCTGGGGCCTTGACAGGTCTGAAGCCATGAACAGGTATGCATTGATCAGCGTGGCCATTGCAGAAGCAGCTGCCCTTGACAATGAAATCATAGATTGCATAGTGTGTAAAATGTTGAGGCTCT
NTN4	12	96131624	96131810	NTN4_14	187	48	GGAGGACTTGTTTCACCTACCAT	CTTGTCCCTGTCAGAGAAATGAC	GGAGGACTTGTTTCACCTACCATGTGGAATGTTCCTGGGGCCTTGACAGGTCTGAAGCCATGAACAGGTATGCATTGATCAGCGTGGCCATTGCAGAAGCAGCTGCCCTTGACAATGAAATCATAGATTGCATAGTGTGTAAAATGTTGAGGCTCTTCGTTCAGGTCATTTCTCTGACAGGGACAAG
NTN4	12	96131759	96131950	NTN4_15	192	45	TGTGTAAAATGTTGAGGCTCTTCG	ACGCATGGTATTTTCTTTCTCCT	TGTGTAAAATGTTGAGGCTCTTCGTTCAGGTCATTTCTCTGACAGGGACAAGACTGTCGTTTCAGCAGCTGCACGCGAAGGTTGGTGATCTTCAGCTGCTCCTGAACTTTGGCACTGTAAGGGTTCTCTGTATCGTATGGTGGTGACAAAGCTTTGAAAATAACCTGTAAGGAGAAAGAAAATACCATGCGT
NTN4	12	96180656	96180853	NTN4_16	198	43	ATGCGGGCTGGTAACATTTTTCT	TTGGGAAAACATGGAAGCCTTAT	ATGCGGGCTGGTAACATTTTTCTATCTTACTTACAGTGTAGAGTTAAACAGGTGCCCTTACCTCTCCTCCAGTGCATGGAAAAGGACTGGAGTATTTAGAAGTACAAATAGCGCCCTTCTTGACAACATCATCTTCCAGGCCAAATGTAGCGGAGCAGTTAGTCGCAAAGTACTTATAAGGCTTCCATGTTTTCCCAA
NTN4	12	96180763	96180951	NTN4_17	189	50	ATAGCGCCCTTCTTGACAACATC	CCAGTTAGACCTGGAAGCTGAAT	ATAGCGCCCTTCTTGACAACATCATCTTCCAGGCCAAATGTAGCGGAGCAGTTAGTCGCAAAGTACTTATAAGGCTTCCATGTTTTCCCAAAGTCCTGGGAGCGGTCCAGCACCATGGCAGCCGGCCTGGGGGACTTGAACATCACAATTAGGTGAGTGAAGTAGAATTCAGCTTCCAGGTCTAACTGG
NTN4	12	96180831	96181016	NTN4_18	186	53	ATAAGGCTTCCATGTTTTCCCAA	GACTCATCCTTCCGGTTTCCTC	ATAAGGCTTCCATGTTTTCCCAAAGTCCTGGGAGCGGTCCAGCACCATGGCAGCCGGCCTGGGGGACTTGAACATCACAATTAGGTGAGTGAAGTAGAATTCAGCTTCCAGGTCTAACTGGATCTTTTCTCTGTGCACATCCTCCGCAGACTGCCACCATGTGCGAGGAAACCGGAAGGATGAGTC
NTN4	12	96180923	96181117	NTN4_19	195	53	AGTAGAATTCAGCTTCCAGGTCT	GCTTCTACAGTGAGAACACGGAT	AGTAGAATTCAGCTTCCAGGTCTAACTGGATCTTTTCTCTGTGCACATCCTCCGCAGACTGCCACCATGTGCGAGGAAACCGGAAGGATGAGTCTGCCATGGCAGATGGCAGGTGAGCCAGGTGAGGATAGGCAGCATTGCACTTGTCACATTTGGGCTGCCGACAAGTCAGATCCGTGTTCTCACTGTAGAAGC
NTN4	12	96180993	96181192	NTN4_20	200	55	GCGAGGAAACCGGAAGGATG	GGATGGGAAATTTGGCTTTGGG	GCGAGGAAACCGGAAGGATGAGTCTGCCATGGCAGATGGCAGGTGAGCCAGGTGAGGATAGGCAGCATTGCACTTGTCACATTTGGGCTGCCGACAAGTCAGATCCGTGTTCTCACTGTAGAAGCAGTACAGTTCGGTAGCATTCTGACCGCAGGTGGTGTCTGCCCAGAGTTTTCGCCCCAAAGCCAAATTTCCCATCC
NTN4	12	96181113	96181296	NTN4_21	184	52	GAAGCAGTACAGTTCGGTAGCAT	AGCTTTCCAGATGGGTTTGTCTT	GAAGCAGTACAGTTCGGTAGCATTCTGACCGCAGGTGGTGTCTGCCCAGAGTTTTCGCCCCAAAGCCAAATTTCCCATCCGAGGGTTGCAGGCTTTTTCACAGCGGGAACTCACTCCAGCTACTCCACTCAGTCCTAAGAAAGGGAAAGCATGCATGATGCAAGACAAACCCATCTGGAAAGCT
NTN4	12	96183967	96184162	NTN4_22	196	74	GAGTCCCGAGATGGGTTAGAGAA	CTTCATCCCGCAGCCCAG	GAGTCCCGAGATGGGTTAGAGAAGCAGCGAGGGAAGGGGTGGGGGCCCCGCCGCGTCACCACCCACCTGCGGCCACCACCGTGCAGCCCCAGAGCAGCAGCAGCCGCGCGCAGCTCCCCATGGCCGGGAGGAGCCGGGAGCAGCCGGGCCGGGCGGGTGCCGGAGGGAGCCGAGACCTCTGGGCTGCGGGATGAAG
RAD51B	14	68290181	68290345	RAD51B_1	165	41	GGATAGCCTATTCACTATCACTTATGTT	CCTGACAGGTAAGGATCTGATGTC	GGATAGCCTATTCACTATCACTTATGTTATATTCTGTTGTTTTTTTCATGGTTCTTCTTTTCTTTGCTGGATCTGGAGGCATGGGTAGCAAGAAACTAAAACGAGTGGGTTTATCACAAGAGCTGTGTGACCGTCTGAGTAGACATCAGATCCTTACCTGTCAGG
RAD51B	14	68290256	68290430	RAD51B_2	175	34	GAGGCATGGGTAGCAAGAAACTA	TTTCATATTTCAAGTTTAAGAGGTATTAAGGTA	GAGGCATGGGTAGCAAGAAACTAAAACGAGTGGGTTTATCACAAGAGCTGTGTGACCGTCTGAGTAGACATCAGATCCTTACCTGTCAGGTAAATTTTATTTAACATTTTTATTGATAAGTTTTATGCACAAGTTAACTTTATACCTTAATACCTCTTAAACTTGAAATATGAAA
RAD51B	14	68292111	68292275	RAD51B_3	165	38	AGGTTTCCTTTTAACTCTAGTATCTTTGTT	CAGGCCCTGCTGACCATAC	AGGTTTCCTTTTAACTCTAGTATCTTTGTTACACATATATGTTTAAAATACTCTCTTTATGTTTCTTTAGGACTTTTTATGTCTTTCCCCACTGGAGCTTATGAAGGTGACTGGTCTGAGTTATCGAGGTGTCCATGAACTTCTATGTATGGTCAGCAGGGCCTG
RAD51B	14	68292189	68292377	RAD51B_4	189	40	ATGTCTTTCCCCACTGGAGCTTA	TGCATGTGCCTCATCCCTAAAAA	ATGTCTTTCCCCACTGGAGCTTATGAAGGTGACTGGTCTGAGTTATCGAGGTGTCCATGAACTTCTATGTATGGTCAGCAGGGCCTGTGCCCCAAAGATGCAAACGGTATATTTATATTTTATTATGATTTGATTATGAATGATTCCTCATCTCATTAAACATGTTTTTTTAGGGATGAGGCACATGCA
RAD51B	14	68301684	68301876	RAD51B_5	193	33	AGGGAAAAGGATGGATTAGGGTT	GCTTCGTCCAAAGCAGAAAGG	AGGGAAAAGGATGGATTAGGGTTAAAATTGCTAAAATTTAGAGAATTAAAGTTGGTTTATGTTTTTGAATATATATAGAGGTTGAAAAAAAACTTAATCATTTTCTTGTTTAGGCTTATGGGATAAAAGCACAAAGGTCTGCTGATTTCTCACCAGCATTCTTATCTACTACCCTTTCTGCTTTGGACGAAGC
RAD51B	14	68301803	68301977	RAD51B_6	175	45	GGGATAAAAGCACAAAGGTCTGC	ACTTTTTCCCTAGCTCTGAAGGT	GGGATAAAAGCACAAAGGTCTGCTGATTTCTCACCAGCATTCTTATCTACTACCCTTTCTGCTTTGGACGAAGCCCTGCATGGTGGTGTGGCTTGTGGATCCCTCACAGAGGTAAAGGAAAAATTTTTCGTACCTTCTTCCATTGACCTATAACCTTCAGAGCTAGGGAAAAAGT
RAD51B	14	68331638	68331828	RAD51B_7	191	32	GGATTTTGCTTTGACTGGCTTGT	CAATGTACACCACAGCTCCTTCT	GGATTTTGCTTTGACTGGCTTGTGATGTTTATCTAAAAAACtttttttttttttttttttttttttttttttttttttttAGATTACAGGTCCACCAGGTTGTGGAAAAACTCAGTTTTGTATAATGATGAGCATTTTGGCTACATTACCCACCAACATGGGAGGATTAGAAGGAGCTGTGGTGTACATTG
RAD51B	14	68331729	68331915	RAD51B_8	187	36	CCACCAGGTTGTGGAAAAACTC	TTCATGCTGTATATAAGTTACAAAAGTAAAAC	CCACCAGGTTGTGGAAAAACTCAGTTTTGTATAATGATGAGCATTTTGGCTACATTACCCACCAACATGGGAGGATTAGAAGGAGCTGTGGTGTACATTGACACAGAGTCTGCATTTAGTGCTGAAAGGTATGAGATTTTATTTTCTATTATAATGTTTTACTTTTGTAACTTATATACAGCATGAA
RAD51B	14	68352517	68352697	RAD51B_9	181	36	TAGAGATTCAGCAATGTGGCTTT	AACTTCATCACAGGTGAGTTCCC	TAGAGATTCAGCAATGTGGCTTTAAGTAGAATTGACTGTTTTCGTTTGTGCTATTTTTTTCACCCACAGACTGGTTGAAATAGCAGAATCCCGTTTTCCCAGATATTTTAACACTGAAGAAAAGTTACTTTTGACAAGTAGTAAAGTTCATCTTTATCGGGAACTCACCTGTGATGAAGTT
RAD51B	14	68352595	68352757	RAD51B_10	163	33	AATAGCAGAATCCCGTTTTCCCA	AAACATAAACCTTCAACGCATTACT	AATAGCAGAATCCCGTTTTCCCAGATATTTTAACACTGAAGAAAAGTTACTTTTGACAAGTAGTAAAGTTCATCTTTATCGGGAACTCACCTGTGATGAAGTTCTACAAAGGTATGCTGCTTTAGATTTTGATTTTTTAGTAATGCGTTGAAGGTTTATGTTT
RAD51B	14	68353657	68353854	RAD51B_11	198	29	AGTTGCTTAGCCTTTGCAATACC	TCTTTGAGATTGCCTTGAAGTTGTG	AGTTGCTTAGCCTTTGCAATACCtttatttatttattttatcttaaatttattgactattttataaattCTTCTTTTATAGGATTGAATCTTTGGAAGAAGAAATTATCTCAAAAGGAATTAAACTTGTGATTCTTGACTCTGTTGCTTCTGTGGTCAGAAAGGAGTTTGATGCACAACTTCAAGGCAATCTCAAAGA
RAD51B	14	68353771	68353966	RAD51B_12	196	37	AGGAATTAAACTTGTGATTCTTGACTCT	AACAAAAGAAAGGAAAAGAAAAAAGAGAA	AGGAATTAAACTTGTGATTCTTGACTCTGTTGCTTCTGTGGTCAGAAAGGAGTTTGATGCACAACTTCAAGGCAATCTCAAAGAAAGAAACAAGTTCTTGGCAAGAGAGGCATCCTCCTTGAAGTATTTGGCTGAGGAGTTTTCAATCCCAGTAAGtttttctttttttctcttttttcttttcctttcttttgtt
RAD51B	14	68758576	68758738	RAD51B_13	163	51	ACCCCTTCTCCCTGTCTGTT	GTCAGTGTCAAGTTTCAGCCTCT	ACCCCTTCTCCCTGTCTGTTCACAGGTTATCTTGACGAATCAGATTACAACCCATCTGAGTGGAGCCCTGGCTTCTCAGGCAGACCTGGTGTCTCCAGCTGATGATTTGTCCCTGTCTGAAGGTAAGGAATCTGTCCTGGAGAGGCTGAAACTTGACACTGAC
RAD51B	14	68878090	68878285	RAD51B_14	196	49	GCCATCTCAAGAAAGGGCATC	CCCCGACCTTCATAGTCAGAGAA	GCCATCTCAAGAAAGGGCATCTGAAAGCGTGCTTTTACCATTTCATTTCAGGCACTTCTGGATCCAGCTGTGTGATAGCCGCACTAGGAAATACCTGGAGTCACAGTGTGAATACCCGGCTGATCCTCCAGTACCTTGATTCAGAGAGAAGACAGGTGGGTGCTTTGACAGTATTCTCTGACTATGAAGGTCGGGG
RAD51B	14	68934826	68935022	RAD51B_15	197	46	GAGTGAATAGAGGCCCATCCCTG	CAATGGGCAGCACTGAGCATAAG	GAGTGAATAGAGGCCCATCCCTGATCCTTTGACTAACCCTAGAAAAATGTGCTTTATGTGCAGATTCTTATTGCCAAGTCCCCTCTGGCTCCCTTCACCTCATTTGTCTACACCATCAAGGAGGAAGGCCTGGTTCTTCAAGGTAAGATCCTTGGATTAAGCCATTTCTTTAAGCTTATGCTCAGTGCTGCCCATTG
RAD51B	14	68944250	68944415	RAD51B_16	166	38	ATGAAAGAGGACTGCTGTTGGAG	CCCCCATCAACTCTAGACAAAGG	ATGAAAGAGGACTGCTGTTGGAGGAAAGTTCCATTTAGGTTGCTGGTGGGAAGTTAGTGCATTTCATAACAATTTTTTTTTTTCAAACTTTCTCTTTTTTTTTTTTTTCCTTTAGGCCAAGAGAAGCCATAGGGATACTGTGACCTTTGTCTAGAGTTGATGGGGG
RAD51B	14	68963763	68963951	RAD51B_17	189	39	AGCCTCAGTAGGCTTTATGCAAG	TTTCACCACAAGACTCTTTCCCA	AGCCTCAGTAGGCTTTATGCAAGCCTTCAACATCTTTTTCTAGGTATCTTGACACTCATGTTCTTTTTCTTCTTGCAGCCTATGGAAATTCCTAGAGACAGATAAATGTGCAAACCTGTTCATCTTGCCAAGAAAAATCCGCTTTTCTGCCACAGAAACAAAATATTGGGAAAGAGTCTTGTGGTGAAA
RAD51B	14	69061110	69061307	RAD51B_18	198	50	TTCCTCAACCATCCTCTTCAGG	TGGGTATGGTGGCACATCT	TTCCTCAACCATCCTCTTCAGGAAGCCTCAGGGCCTCAGAGAAAGGCAAAAGGGCCTAGACTTTGACTTCCttttttttctctctctcttagagacaacattttgctctgtcacccaagctgaactgaactgggctccagaaatcctcccacctcagcctcctgagcagctaggactacagatgtgccaccataccca
RAD51B	14	69061232	69061394	RAD51B_21	163	48	AACTGAACTGGGCTCCAGAA	GTGGGTGGATCTCTTGAAGC	AACTGAACTGGGCTCCAGAAATCCTCCCACCTCAGCCTCCTGAGCAGCTAGGACTACAGATGTGCCACCATACCCAGCTAATTTTTTAATTTTTTGTAGAGGTGGGGTCTCATTATGTTGCCCAAGCTGATCTCAAACTCCTGGCTTCAAGAGATCCACCCAC
TOX3	16	52473065	52473255	TOX3_1	191	51	TTCAGCCACATATGCTTTTCCCT	CTCAGATAACATCCCCCATCCCT	TTCAGCCACATATGCTTTTCCCTCCTATGCCACTCTCCTTGGTATACGCAAATCCGTCTGCCATATGCGTCTTCAGAAAATACTGACCTGCGATAATACTTGAGTCTGTGTCTGAGACTGTATTTGCGACTGGTGCTGCTGAGAGGCTGGCTGGGGGCTCCCGATGGCAGGGATGGGGGATGTTATCTGAG
TOX3	16	52473176	52473375	TOX3_2	200	60	CTGAGACTGTATTTGCGACTGG	AGCAGCAAATTAATCAACAGCAG	CTGAGACTGTATTTGCGACTGGTGCTGCTGAGAGGCTGGCTGGGGGCTCCCGATGGCAGGGATGGGGGATGTTATCTGAGAGGCGACAGGGGAGTGCTGCCGAGGAGAAGGCTGAGACTGGTGCTGCATGtgttgcagctgctgcagctggaggcgctgctgcagctgctgctgcagctgctgttgattaatttgctgct
TOX3	16	52473321	52473515	TOX3_3	195	55	AGCTGGAGGCGCTGCT	GCAACAACAACAGATGCAACAGA	agctggaggcgctgctgcagctgctgctgcagctgctgttgattaatttgctgctggagatgctgctgctgctgctgcaggtgctgctgcatgtggtgctggaaatgctgctgctgcatctgctgctggatttgctgatgcatttggtgctgctggagttgctgctgctgcatctgttgcatctgttgttgttgc
TOX3	16	52473443	52473625	TOX3_4	183	54	CTGCTGGATTTGCTGATGCATTT	CTGATAAGCTCCATGGGAACGAC	ctgctggatttgctgatgcatttggtgctgctggagttgctgctgctgcatctgttgcatctgttgttgttgctgctgctgctgctgctgcAATTGCATCTGATGCTGCTGGGTTTGCACCGAAGGACTCACTTGGGTGGAGGGTGCTGAGCCAACCATGGTCGTTCCCATGGAGCTTATCAG
TOX3	16	52473554	52473741	TOX3_5	188	54	GGTTTGCACCGAAGGACTCAC	AGCAATCCCTCCCTAGGTCAAT	GGTTTGCACCGAAGGACTCACTTGGGTGGAGGGTGCTGAGCCAACCATGGTCGTTCCCATGGAGCTTATCAGTGGAGCCCCAATGTTCGAGGGCATGTTGGCTGCAATGGTGACTGATGTGACAATCTGGTTCATGGGGAGTCTCATGGTTAAGGGTTTGGGAGCGATTGACCTAGGGAGGGATTGCT
TOX3	16	52473604	52473800	TOX3_6	197	52	TCGTTCCCATGGAGCTTATCAGT	CCTTCTCAACACTCCACTGTCTC	TCGTTCCCATGGAGCTTATCAGTGGAGCCCCAATGTTCGAGGGCATGTTGGCTGCAATGGTGACTGATGTGACAATCTGGTTCATGGGGAGTCTCATGGTTAAGGGTTTGGGAGCGATTGACCTAGGGAGGGATTGCTGGAGAGTCTGAGGTGATGCTGACACTGTTCCATGTTGAGACAGTGGAGTGTTGAGAAGG
TOX3	16	52473719	52473910	TOX3_7	192	53	GATTGACCTAGGGAGGGATTGCT	CAGTCTGGAATTTTCTCCCCCAA	GATTGACCTAGGGAGGGATTGCTGGAGAGTCTGAGGTGATGCTGACACTGTTCCATGTTGAGACAGTGGAGTGTTGAGAAGGAGAGAGGATGTTAGATTGGTCGACGCCAGGGTCTGCTGAACAGAACGGATGGTCTGGGCTTCTGCTGACTCAGCAGCAGCCTGCATTTTGGGGGAGAAAATTCCAGACTG
TOX3	16	52478116	52478303	TOX3_8	188	48	GTTTTCAATGCTTGAGGGCTGTT	CGCTAAAGGTGGTGCTAATTGTG	GTTTTCAATGCTTGAGGGCTGTTTTCCACGCTGTGACTATTTTGGAGCCTGGCCGCCCCTGCCCAGGTTTACCTTAGAAACGAGGCTGGCCCTGTATGCCGCCAGGGCCTTCAGGTATTCTTTTTTGGCAGCTTCTGTTTTCCTTTTATATACCTATTAAAAGACCACAATTAGCACCACCTTTAGCG
TOX3	16	52479821	52480007	TOX3_9	187	42	AACACATGCACTTGGAAAAGGTG	ACACAGGCTGCAATTAAAGGTCA	AACACATGCACTTGGAAAAGGTGTGAGGAATATTTTAAATGATCATGAGGTTTATTGATGGAGCCTTGATGGGTCTTTGTCTCACCTGCTTTTGTTCTTCTCCAAGGCTGTCCCACATAGATGCTACAATTTTTGAGACCTCTCCAAAGGTTGCATTGGGGTTTTGACCTTTAATTGCAGCCTGTGT
TOX3	16	52479902	52480098	TOX3_10	197	44	TCACCTGCTTTTGTTCTTCTCCA	CAAGAAGCCCAAGACTCCAAAGA	TCACCTGCTTTTGTTCTTCTCCAAGGCTGTCCCACATAGATGCTACAATTTTTGAGACCTCTCCAAAGGTTGCATTGGGGTTTTGACCTTTAATTGCAGCCTGTGTGTCTCTGAAAAACAGGGCATATGCTGACACTGGCTTCTGTGGCTCATTGGGATCTTTCTTTTTCTTTTTCTTTGGAGTCTTGGGCTTCTTG
TOX3	16	52479965	52480161	TOX3_11	197	46	CAAAGGTTGCATTGGGGTTTTGA	GGCAGTGAATTTTCTTCCTGCTT	CAAAGGTTGCATTGGGGTTTTGACCTTTAATTGCAGCCTGTGTGTCTCTGAAAAACAGGGCATATGCTGACACTGGCTTCTGTGGCTCATTGGGATCTTTCTTTTTCTTTTTCTTTGGAGTCTTGGGCTTCTTGCCAGAGTCTGGAGCAGCTCTTTTCTCTCCAATGGCCTGCAAAGCAGGAAGAAAATTCACTGCC
TOX3	16	52484152	52484347	TOX3_12	196	53	CTCTGGCAGGTTACACACTAAGG	CTCACCACCATCAACCAGTCTCA	CTCTGGCAGGTTACACACTAAGGCAGTTCTAACTTACTCTGTTGGCTTCATCAGCATCCTCTTCATTGATGGAGCTGGAAGGGGAGGGAGTGGCTGATTTGCTTGCTGGAGGTGAAGGAGATGTGTGAGGCATACTGGCACCTCCCAAATTCAACCCCAACTGGGCGCTGAGCTGAGACTGGTTGATGGTGGTGAG
TOX3	16	52484292	52484490	TOX3_13	199	57	CCTCCCAAATTCAACCCCAACT	AATATTTTCCCCCTTTGTTGCTG	CCTCCCAAATTCAACCCCAACTGGGCGCTGAGCTGAGACTGGTTGATGGTGGTGAGCTGGGCAGGAGGCATGACCCCAGAACGCGCAGCATCGGTCATGTGGACGATGGACCGCATGATCAGGGAGGGATCCTGCCGGTACTGGGACACTTGTGTGTGGCTCTGATCCTAGAAAGGCAGCAACAAAGGGGGAAAATATT
TOX3	16	52497755	52497953	TOX3_14	199	41	AAGAGCACGTTTCAGAACATGGA	GAATTCACACCCCAGTTTCCC	AAGAGCACGTTTCAGAACATGGACTCTCAGATCTTTACTATGATTTGTGCAAATGATAAAAAATAATTTAAGTAATAAATGTGGTGCCTACCATATGCAACCCACTGCTATGAAGCACGCCATCTTGTTCCACGAGATTTCTTGAGATTGTAATGGAAGGGAGGTCCAGGCTTTGAGGGGGAAACTGGGGTGTGAATTC
A217	16	52497845	52498035	TOX3_15	191	53	CCATATGCAACCCACTGCTATGA	AGAGTCAGACCCTGCCCTA	CCATATGCAACCCACTGCTATGAAGCACGCCATCTTGTTCCACGAGATTTCTTGAGATTGTAATGGAAGGGAGGTCCAGGCTTTGAGGGGGAAACTGGGGTGTGAATTCACTTCCCTGGGAAGGCAATGGATCGCTGAGGGCTTGAAAGGGTAGCAGTACATCCGGCATGCCTAGGGCAGGGTCTGACTCT
TOX3	16	52497970	52498162	TOX3_16	193	49	AATGGATCGCTGAGGGCTTG	TCCCCGGAGGAATAAGATATAGGA	AATGGATCGCTGAGGGCTTGAAAGGGTAGCAGTACATCCGGCATGCCTAGGGCAGGGTCTGACTCTGGAGGAGGCGTGATTGGTGGAATTTCGAATTCCTCGTCCCCAAGGCTTGGTGTGTGGAATGTCTGCTAAAAGGAAACAAAATACAGGTATCTTCATATTCTGTTCCTATATCTTATTCCTCCGGGGA
TOX3	16	52502340	52502524	TOX3_17	185	35	ACTTTGTTTTTCCCTTCAAGCCTA	TGCCGCATATTAACGTAAAACAA	ACTTTGTTTTTCCCTTCAAGCCTATTAAATTATCTCAATAACACAAAAAACAGGAACAAACACATTAAGACAGTCACCTACCTCACTGGCAGCGAAGAACGCATTGTTCGCCTCAGCCATATTCATATAGTTATTATTATTTCCAAACTGAAAGAAAACAGATTGTTTTACGTTAATATGCGGCA
TOX3	16	52553265	52553458	TOX3_18	194	47	CTGGTTAGCCTGTCCAGATCCAT	GCAGAGGACAGAAGAGTCAGAAG	CTGGTTAGCCTGTCCAGATCCATTAGAAACCTCACCAGAAGATTAGGTCTTACTTTCAGATAGGTAGTTATCAGGTAATGAAGTCTCTCCTCAATGCGCCTGGCTCCCGAGCGAGGTTGGCACTTCATCCTCCACTACATCTTCTATGAGTATCTAAATCCTCTCTACCCTCTTCTGACTCTTCTGTCCTCTGC
TOX3	16	52580442	52580641	TOX3_19	200	72	GGAAAGAGGCCAAAGAAAAGTGC	TTCGGCATGGATGTGAGGTTCTA	GGAAAGAGGCCAAAGAAAAGTGCAGCAGGCGGTGAGCCCGAGCGCGGGGCGCGCCCAGGATGGGGAGGTGGCCCCCGCCCCCCGGCCCACCGGCCCAGCCCGGTCACCTTGCTGTAGCCGTAGTACCCCAGGCACTGCGCGAAGTCCAGGCTGGCAGGGTCCCCGGCCGCCGCGGGGTAGAACCTCACATCCATGCCGAA
TOX3	16	52580548	52580727	TOX3_20	180	74	CCTTGCTGTAGCCGTAGTACCC	GCCCTCGACGGTGGATCT	CCTTGCTGTAGCCGTAGTACCCCAGGCACTGCGCGAAGTCCAGGCTGGCAGGGTCCCCGGCCGCCGCGGGGTAGAACCTCACATCCATGCCGAAGCTgggcccggggccgggggccgggACTGGGGTTCGCCGGGGCCGGGACCCGCCTCCTCGCCGCCGCTAGATCCACCGTCGAGGGC
FTO	16	53738014	53738200	FTO_1	187	63	CTGAGAGAACTACATGCAGGAGG	GTTCCCTGATCCTTGCTCACA	CTGAGAGAACTACATGCAGGAGGCGGGGTCCAGGGCGAGGGATCTACGCAGCTTGCGGTGGCGAAGGCGGCTTTAGTGGCAGCATGAAGCGCACCCCGACTGCCGAGGAACGAGAGCGCGAAGCTAAGGTATGTCGGGCTCCCGGGGCCTGGAGATCTTCGTGCGCTGTGAGCAAGGATCAGGGAAC
FTO	16	53843992	53844182	FTO_2	191	35	AGAGTGTCTTACTTTGGGTTATTGC	AAGGTTGATCAGAACACATCACT	agagtgtcttactttgggttattgcatattCACTTATATGTAATTATTATTTTCAAACAGAAACTGAGGCTTCTTGAAGAGCTTGAAGACACTTGGCTCCCTTATCTGACCCCCAAAGATGATGAATTCTATCAGCAGGTAAGGTATTTTAATATTTTTATCAGTTTCAGTGATGTGTTCTGatcaacctt
FTO	16	53859743	53859935	FTO_3	193	45	TCAACGTCTGTTTTTGCTTTGGT	ATACCGGAGTGAGCAGATCTTTG	TCAACGTCTGTTTTTGCTTTGGTTTTGTTTTAGTGGCAGCTGAAATATCCTAAACTAATTCTCCGAGAAGCCAGCAGTGTATCTGAGGAGCTCCATAAAGAGGTTCAAGAAGCCTTTCTCACACTGCACAAGCATGGCTGCTTATTTCGGGACCTGGTTAGGATCCAAGGCAAAGATCTGCTCACTCCGGTAT
FTO	16	53859882	53860081	FTO_4	200	51	GCTTATTTCGGGACCTGGTTAGG	ATTGAGCTTGAGGAAGGTCTCAC	GCTTATTTCGGGACCTGGTTAGGATCCAAGGCAAAGATCTGCTCACTCCGGTATCTCGCATCCTCATTGGTAATCCAGGCTGCACCTACAAGTACCTGAACACCAGGCTCTTTACGGTCCCCTGGCCAGTGAAAGGGTCTAATATAAAACACACCGAGGCTGAAATAGCCGCTGCTTGTGAGACCTTCCTCAAGCTCAAT
FTO	16	53859962	53860149	FTO_5	188	49	TGCACCTACAAGTACCTGAACAC	TCCTCATTAGCCTTCTCTTTGGC	TGCACCTACAAGTACCTGAACACCAGGCTCTTTACGGTCCCCTGGCCAGTGAAAGGGTCTAATATAAAACACACCGAGGCTGAAATAGCCGCTGCTTGTGAGACCTTCCTCAAGCTCAATGACTACCTGCAGATAGAAACCATCCAGGCTTTGGAAGAACTTGCTGCCAAAGAGAAGGCTAATGAGGA
FTO	16	53860059	53860253	FTO_6	195	48	GTGAGACCTTCCTCAAGCTCAAT	CGTTGTATGCTGCTCTGCTCTTA	GTGAGACCTTCCTCAAGCTCAATGACTACCTGCAGATAGAAACCATCCAGGCTTTGGAAGAACTTGCTGCCAAAGAGAAGGCTAATGAGGATGCTGTGCCATTGTGTATGTCTGCAGATTTCCCCAGGGTTGGGATGGGTTCATCCTACAACGGACAAGATGAAGTGGACATTAAGAGCAGAGCAGCATACAACG
FTO	16	53860126	53860310	FTO_7	185	45	TGCCAAAGAGAAGGCTAATGAGG	AAGGTTCCTCTTTCAGGTATGGC	TGCCAAAGAGAAGGCTAATGAGGATGCTGTGCCATTGTGTATGTCTGCAGATTTCCCCAGGGTTGGGATGGGTTCATCCTACAACGGACAAGATGAAGTGGACATTAAGAGCAGAGCAGCATACAACGTAACTTTGCTGAATTTCATGGATCCTCAGAAAATGCCATACCTGAAAGAGGAACCTT
FTO	16	53860243	53860437	FTO_8	195	45	AGCATACAACGTAACTTTGCTGAA	ATACAGGGCTGCTTTTTCCAAGA	AGCATACAACGTAACTTTGCTGAATTTCATGGATCCTCAGAAAATGCCATACCTGAAAGAGGAACCTTATTTTGGCATGGGGAAAATGGCAGTGAGCTGGCATCATGATGAAAATCTGGTGGACAGGTCAGCGGTGGCAGTGTACAGTTATAGCTGTGAAGGTACAGTCTGCTCTTGGAAAAAGCAGCCCTGTAT
FTO	16	53878015	53878195	FTO_9	181	44	AGAAGCTTAGATTAAACATTTCCTTTCTG	AGTCTCCTTGGTGAAGGGGTATC	AGAAGCTTAGATTAAACATTTCCTTTCTGATCATTTTCTTCTCTTTTGGCAGGCCCTGAAGAGGAAAGTGAGGATGACTCTCATCTCGAAGGCAGGGATCCTGATATTTGGCATGTTGGTTTTAAGATCTCATGGGACATAGAGACACCTGGTTTGGCGATACCCCTTCACCAAGGAGACT
FTO	16	53878142	53878335	FTO_10	194	32	TCTCATGGGACATAGAGACACCT	GAAGTTTCGCTCTTAATATAAAATACTCCA	TCTCATGGGACATAGAGACACCTGGTTTGGCGATACCCCTTCACCAAGGAGACTGCTATTTCATGCTTGGTAATCTTTGGAAAATCAAAATTATATTGAAACTCTAGTGTCTAAATTTAGATTATAGGATTTATATTTTGAGTATGTCTTATGAAATAAACTTTTGGAGTATTTTATATTAAGAGCGAAACTTC
FTO	16	53907665	53907844	FTO_11	180	42	TGGTTTTATACATTTCTGGTGTTTTTCC	AAATTGCTCATTCAACCACTTCTGTC	TGGTTTTATACATTTCTGGTGTTTTTCCTGTAGATGATCTCAATGCCACCCACCAACACTGTGTTTTGGCCGGTTCACAACCTCGGTTTAGTTCCACCCACCGAGTGGCAGAGGTAAGTGTAAATAAAAATGTGATTCACACCTAATTGGATGTGACAGAAGTGGTTGAATGAGCAATTT
FTO	16	53913729	53913908	FTO_12	180	41	TTGTGATTGCTGGTTCTGTCTCA	aGTCCTTACCTCATTATGAATTTCTTCT	TTGTGATTGCTGGTTCTGTCTCAACAGTGCTCAACAGGAACCTTGGATTATATTTTACAACGCTGTCAGTTGGCTCTGCAGAATGTCTGTGACGATGTGGACAATGATGATGTCTCTTTGAAATCCTTTGAGCCTGCAGTTTTGAAACAAGGAGAAGAAATTCATAATGAGGTAAGGACt
FTO	16	53922677	53922870	FTO_13	194	47	AAGTCATTGTCCTCGCTTGTCTA	GACTTACCACACCCTCCATCTTC	AAGTCATTGTCCTCGCTTGTCTATCACAAGGGTATTAAAACCACCATCTTCTCTTTATGGTCCACAGGTCGAGTTTGAGTGGCTGAGGCAGTTTTGGTTTCAAGGCAATCGATACAGAAAGTGCACTGACTGGTGGTGTCAACCCATGGCTCAACTGGAAGCACTGTGGAAGAAGATGGAGGGTGTGGTAAGTC
FTO	16	53922731	53922913	FTO_14	183	50	TTATGGTCCACAGGTCGAGTTTG	TGTATAACACAGCAGCCCAGAAA	TTATGGTCCACAGGTCGAGTTTGAGTGGCTGAGGCAGTTTTGGTTTCAAGGCAATCGATACAGAAAGTGCACTGACTGGTGGTGTCAACCCATGGCTCAACTGGAAGCACTGTGGAAGAAGATGGAGGGTGTGGTAAGTCCATCAGACCTGGGACCGTGTTTTCTGGGCTGCTGTGTTATACA
FTO	16	53967783	53967979	FTO_15	197	37	GCAGGGGAACTGTAATAAAAAAGCC	GAGGCAAGGATGGCAGTCAAG	GCAGGGGAACTGTAATAAAAAAGCCATTGATTTACTGTCCTTATTTGCTTATGGGCttttttttattattaatttttCACTTTTTCTTTCTCTGTTTTGGATCATTTCTTGTAGACAAATGCTGTGCTTCATGAAGTTAAAAGAGAGGGGCTCCCCGTGGAACAAAGGAATGAAATCTTGACTGCCATCCTTGCCTC
FTO	16	53967881	53968060	FTO_16	180	47	GGATCATTTCTTGTAGACAAATGCTGT	TGTCAAGAACAACAAATCCCATTTCA	GGATCATTTCTTGTAGACAAATGCTGTGCTTCATGAAGTTAAAAGAGAGGGGCTCCCCGTGGAACAAAGGAATGAAATCTTGACTGCCATCCTTGCCTCGCTCACTGCACGCCAGAACCTGAGGAGAGAATGGCATGCCAGGTTAGTTCTGTTGTGAAATGGGATTTGTTGTTCTTGACA
FTO	16	54145594	54145793	FTO_17	200	50	TGTTGCTCCAAGCTTCCTGTG	TCTGAAACGATGTCTGTGAGGTC	TGTTGCTCCAAGCTTCCTGTGGGTTGGGGTCTTCTGGGGGTTTCCTCCCGTGGATTAATTTCCTATTTTTACTCTTCCAGGTGCCAGTCACGAATTGCCCGAACATTACCTGCTGATCAGAAGCCAGAATGTCGGCCATACTGGGAAAAGGATGATGCTTCGATGCCTCTGCCGTTTGACCTCACAGACATCGTTTCAGA
FTO	16	54145680	54145870	FTO_18	191	50	GTCACGAATTGCCCGAACATTAC	AAGCCGATCTCTTTTTCTCCTCC	GTCACGAATTGCCCGAACATTACCTGCTGATCAGAAGCCAGAATGTCGGCCATACTGGGAAAAGGATGATGCTTCGATGCCTCTGCCGTTTGACCTCACAGACATCGTTTCAGAACTCAGAGGTCAGCTTCTGGAAGCAAAACCCTAGAAGGAGCACAAGTCTCAGGCGGAGGAGAAAAAGAGATCGGCTT
CDYL2	16	80638216	80638395	CDYL2_1	180	55	AGACACTGTGCTCTGGTTTCC	CTGGAAGACGTGAACGAGAAGG	AGACACTGTGCTCTGGTTTCCGAAACACAGGGCAGAGCTGGAAGTTGGGGGCCCGTGAGCTGGGGCCCCTCAGACTTCATAAATTTTGTCCTGCAGGTAGCTGAAAAGGGAGTCAAGGCCTTTGGAGGAGCTCCAGAGCTGCTTGAGCATGAGGCATTCCTTCTCGTTCACGTCTTCCAG
CDYL2	16	80638309	80638507	CDYL2_2	199	54	CAGGTAGCTGAAAAGGGAGTCAA	GGTACCTAGTTCTGGAGCAGAGT	CAGGTAGCTGAAAAGGGAGTCAAGGCCTTTGGAGGAGCTCCAGAGCTGCTTGAGCATGAGGCATTCCTTCTCGTTCACGTCTTCCAGCACTGATTTCAGGAAGCTCCGCACGAGGCATTTGGACTCCTCTAACACCTAGAGGGAAATAGACAGGCCTGATTAGCCGGGCACCAGGGACTCTGCTCCAGAACTAGGTACC
CDYL2	16	80641969	80642160	CDYL2_3	192	61	CAGGAGGCGCAGGAACTC	CAGTCTTTGCCTGCTTTTGCTTT	CAGGAGGCGCAGGAACTCACCACGGCACTGCAGGATGCCATCTCCTTGACCCGCAGCATGACCTCCTGGCTGAACGTGGTGGGCCAGAAGACCTGCGACACCAGCCCCCTGCTGCAGGCCTCCTGGGCGGTGAGCTTCCGCCCACAGAACAGCATCTCATTGGCCTGAAAAAGCAAAAGCAGGCAAAGACTG
CDYL2	16	80646448	80646647	CDYL2_4	200	63	CATGAAGAGCCCCTAAACCCAAG	TGCCCCTCTGTGACATCGT	CATGAAGAGCCCCTAAACCCAAGGCAGAGGAAGGATCCTGCTGGGACCCGAATCCAGGTATCACAGGAGGCTTACCAGCGCGACGCCCAGGATCTGGGGGAAGGTGTAGGAGGAGCAGCCAGCAGGCGTGAGGCGGATGGTGGCGTAGGGCGTCTGGAACCAGGCCTTCTCACTGGCCCACACGATGTCACAGAGGGGCA
CDYL2	16	80646604	80646794	CDYL2_5	191	56	GAACCAGGCCTTCTCACTGG	GTTCCAGTGGGGCTTAGCAT	GAACCAGGCCTTCTCACTGGCCCACACGATGTCACAGAGGGGCAGGATGGAGGCACCCAGGCCCAGGGCCGGCCCATTGATGGCCACCACGATAGGCTTCTTAAACTGGATAAAGGCCTTCACAAAGTCCCTGGGAGAGAAAGAAGATCCTCTTGAACAGGTGACTATAGCATGCTAAGCCCCACTGGAAC
CDYL2	16	80654578	80654763	CDYL2_6	186	54	TCGAATTTAACTGAGCAGCCTGTA	GCAGTGGGGAGCGTGTTC	tcgaatttaactgagcagcctgtatttttacttggtaatcctaCGCAGGACCCCAGGGTGTGTGAAAAGGAGCACAGCTCACCTGATGGCTTCTGCAATCCGAGTGCTCTCCTTTCGCCGGTCGCTGGACAACCGGCCAATTAGGTAGGAATAATCCAGGCCGCTGCAGAACACGCTCCCCACTGC
CDYL2	16	80654701	80654887	CDYL2_7	187	56	GCTGGACAACCGGCCAATTA	CCCAGGCTTACAGGATAGACACT	GCTGGACAACCGGCCAATTAGGTAGGAATAATCCAGGCCGCTGCAGAACACGCTCCCCACTGCGCTGAGGAGCAGCAGTTTGCTGTCGTCTGTGGCTGCGTTGCAGAGCGCTCGCCGGACTTCTTTCATGATCTGCCGGCAGAGATGAATTTGCAGGGATGTTAAGTGTCTATCCTGTAAGCCTGGG
CDYL2	16	80666827	80667016	CDYL2_8	190	55	GATGGAAGGAAGGAGAAAGCCAA	GCAACTGTCGGTTTCGAGACATC	GATGGAAGGAAGGAGAAAGCCAATATTCCATTCTGAGTGAGAAGGAGCCACAGCCCAGCTTGCCCTTCCCTCTGGCCGCCACCCCTTACCTCAGGTGTCAGGGCATTGTTATCCGAGGTCTGACTGGACAGCAGGATGTGCGTGAACCCTTCTTCCTTCCGCACAACGATGTCTCGAAACCGACAGTTGC
CDYL2	16	80666917	80667115	CDYL2_9	199	52	TCAGGTGTCAGGGCATTGTTATC	GGGGATTGAACCTGCACAGTC	TCAGGTGTCAGGGCATTGTTATCCGAGGTCTGACTGGACAGCAGGATGTGCGTGAACCCTTCTTCCTTCCGCACAACGATGTCTCGAAACCGACAGTTGCTTTCATTCTGGCGGACACTGTATCTGAGCCTTTTGTCAAAGACGTAGTCCTTCTCCGCTTCCAGCTTCCTCTTCACTGGACTGTGCAGGTTCAATCCCC
CDYL2	16	80667013	80667206	CDYL2_10	194	48	TTGCTTTCATTCTGGCGGACAC	ACGTCCTCTGATCACATCCTTCT	TTGCTTTCATTCTGGCGGACACTGTATCTGAGCCTTTTGTCAAAGACGTAGTCCTTCTCCGCTTCCAGCTTCCTCTTCACTGGACTGTGCAGGTTCAATCCCCCGTTGGTCAGAGCAGAGCCTTCCAAAACCAGATAAACAATGTAAGAAACTGAAATGGACCACGATCCTAGAAGGATGTGATCAGAGGACGT
CDYL2	16	80718373	80718564	CDYL2_11	192	52	CAGGCAGAGCTCCCCTTTC	TCTGAGAAGGATGAGAGGCACTT	CAGGCAGAGCTCCCCTTTCGCCATGGCCAGAGCCAAACCCAAGAGAAAGAAAAGCTACAAACCGAGCCCGTTCTCCGCCAGTGTAGCGTGATTCACGTCACATTCACCCATATCTTGCTCTCCAACATGATCATTCAAATCCAAGCCAGGCTGATGGGACCCATTTCCAAAGTGCCTCTCATCCTTCTCAGA
CDYL2	16	80718477	80718671	CDYL2_12	195	52	CACCCATATCTTGCTCTCCAACA	GAGGTGACAGGGCCACCAA	CACCCATATCTTGCTCTCCAACATGATCATTCAAATCCAAGCCAGGCTGATGGGACCCATTTCCAAAGTGCCTCTCATCCTTCTCAGAGCCGGCGTCCCCATTTTCCATCCCGTTCTGAGACTTTTTCAGGGGCATTATTTGCAAACCACTGGGGGTAGTCCTGTAAGACACCGTCTTGGTGGCCCTGTCACCTC
CDYL2	16	80718580	80718776	CDYL2_13	197	52	TTCCATCCCGTTCTGAGACTTTT	GACCTTCAGATCCTGGAAAGAGC	TTCCATCCCGTTCTGAGACTTTTTCAGGGGCATTATTTGCAAACCACTGGGGGTAGTCCTGTAAGACACCGTCTTGGTGGCCCTGTCACCTCCTGAAGAGGGCTTGCCTGAATACCCTTTTTTTGGCTTGGCCAGGGGAGGGTTAATTCGCTTCCGTTTATGGGAGGTCCCCTTGCTCTTTCCAGGATCTGAAGGTC
CDYL2	16	80718720	80718919	CDYL2_14	200	52	GGTTAATTCGCTTCCGTTTATGGG	CCTCTTGCACTGTGAGGAGTTTA	GGTTAATTCGCTTCCGTTTATGGGAGGTCCCCTTGCTCTTTCCAGGATCTGAAGGTCTGTGGGACAGTTTCTCAACCGACGGGCCTCGACTGTCACGCAGCAGCTTGGAGGTACTGGACTGCTTCCCTGACTTGATCCTCTTGTCCTTGGACATGTGCAACCCATTGAATTCATCAATAAACTCCTCACAGTGCAAGAGG
CDYL2	16	80718841	80719039	CDYL2_15	199	48	CTTCCCTGACTTGATCCTCTTGT	TCTTGTATCGCAGGTTGAAAGGA	CTTCCCTGACTTGATCCTCTTGTCCTTGGACATGTGCAACCCATTGAATTCATCAATAAACTCCTCACAGTGCAAGAGGTGGTGCTCCGGCTCCCACGTGTCCTCGGTGCTCCCGTAGCCTTTCCATCGGATAAGATACTCCCATTTTCCTTTCTTGTTCTTCCTCTTGTCTACAATCCTTTCAACCTGCGATACAAGA
CDYL2	16	80718893	80719083	CDYL2_16	191	48	TCAATAAACTCCTCACAGTGCAA	ACTGAGTTTTTTCCTCCCTCTCTC	TCAATAAACTCCTCACAGTGCAAGAGGTGGTGCTCCGGCTCCCACGTGTCCTCGGTGCTCCCGTAGCCTTTCCATCGGATAAGATACTCCCATTTTCCTTTCTTGTTCTTCCTCTTGTCTACAATCCTTTCAACCTGCGATACAAGATGAGAGGGTCAGAAAACAGAGAGAGAGGGAGGAAAAAACTCAGT
CDYL2	16	80837928	80838101	CDYL2_17	174	80	cGGGCTCGGCAACTCC	CACACCGGCGAGCCAA	cGGGCTCGGCAACTCCGGATTgcgcccggccccggccccggcccggTCcccgccgcccgccgccgccgcccgccgccgcccgcTGACTggggccggcccgcgcccccgcgTCCCCGTACCTCGTAAAGGTCCCCAGAAGCCATGCCAGGCTGCGGAACTTGGCTCGCCGGTGTG
COX11	17	53038541	53038721	COX11_1	181	43	ATGGGGAAAGAGAAGGACAGGAT	GAAATGTGCCACCATGGCTTTG	ATGGGGAAAGAGAAGGACAGGATGAATACTGGCCATTTTCTTCTCTTTATTTTAGAAGAAAGTGGATGATCAGCTCACTACCACATCAAAGGTGCCAACTCTCTAAAACGTAGACTCTGTGCAGCTTTGAAGCCTGGAAGACAATACCTACCAACATGTCAAAGCCATGGTGGCACATTTC
COX11	17	53040021	53040216	COX11_2	196	35	TTCTCCTTTGAGAAGATAGGATATATGATT	TTCTACATTGATCCTGAATTTGCTG	TTCTCCTTTGAGAAGATAGGATATATGATTTTCCCAAAAATCACAACTTTGAAGGAAGACTTAGTTGCTGACTTCAATTATATCCTGGAACTGGCAACTTGTGCCCTTCCTTTGCTTCAAAAAAAGTGTAAGAAAGAGTGATAAGATCAACTTTAATCATTCTTGGATCTTCAGCAAATTCAGGATCAATGTAGAA
COX11	17	53040101	53040283	COX11_3	183	38	TATCCTGGAACTGGCAACTTGTG	TTTCCAGTGCTTCTGTTTTGAAG	TATCCTGGAACTGGCAACTTGTGCCCTTCCTTTGCTTCAAAAAAAGTGTAAGAAAGAGTGATAAGATCAACTTTAATCATTCTTGGATCTTCAGCAAATTCAGGATCAATGTAGAAAAACACTGGCATATCTACTTCCTCTTGGGGATTAAGCCTTTGTTCTTCAAAACAGAAGCACTGGAAA
COX11	17	53040185	53040375	COX11_4	191	34	GGATCTTCAGCAAATTCAGGATCAA	TCACGAAGTGTACTGGAATGCTA	GGATCTTCAGCAAATTCAGGATCAATGTAGAAAAACACTGGCATATCTACTTCCTCTTGGGGATTAAGCCTTTGTTCTTCAAAACAGAAGCACTGGAAATTATAGAAAGATTTTAATAACATTTCTATTCTCGTATTACATAACAGAAACTATACAGTTCTTTTATCTTAGCATTCCAGTACACTTCGTGA
COX11	17	53040567	53040757	COX11_5	191	30	TCGTTTTCAGAAATCACAAGATCTAC	AGCTAAGAATCCTACTGACAAACCA	TCGTTTTCAGAAATCACAAGATCTACTAAAACACTAAGTTTCATACTAAACCGTTTCATGTATCTTTATCATATTCTGTAAAGTTTACACTTTGATGTACCTGTATTTTATTGAAATACTGTCCAGCTTCAAATGGAACAATATTGTATGTAGAAATTCCAATTACTGGTTTGTCAGTAGGATTCTTAGCT
COX11	17	53040676	53040855	COX11_6	180	36	ATTGAAATACTGTCCAGCTTCAAATG	GCAGGGAAAAGAGGAACTTTGTG	ATTGAAATACTGTCCAGCTTCAAATGGAACAATATTGTATGTAGAAATTCCAATTACTGGTTTGTCAGTAGGATTCTTAGCTCTGTAAAACGCCAGTGCAGTCTCTCCTGGCACCACCTGTTTTAAAGAATATATATATTATCAATACTTTGAATCTCACAAAGTTCCTCTTTTCCCTGC
COX11	17	53041978	53042159	COX11_7	182	34	AGTCCTCTGACAGTTTAAGTGATG	AACATGGTGCCTGTTAAAGATCG	AGTCCTCTGACAGTTTAAGTGATGAAAGAAAGGAATTTACATTAATAAAGTAATCTTTTAATGACTGGTTAGTCACTTACATATATTTCTGTTTGCTGAGGTCTAAAGTTCCACTGGAGACTTGCATGCACATCTGCATTAAAGCTAATTTTAATGATTCGATCTTTAACAGGCACCATGTT
COX11	17	53042085	53042275	COX11_8	191	37	GTTCCACTGGAGACTTGCAT	TCAAATAAATAGATCATCAACACCTAAAAGT	GTTCCACTGGAGACTTGCATGCACATCTGCATTAAAGCTAATTTTAATGATTCGATCTTTAACAGGCACCATGTTTTCAATCTTGTCTGAGGCATGACCTGCAACTGCTGATCCTCCAAGTCCAGTAGTCTAGAAAAAGATACCAAATATGTTAAACAATACTTTTAGGTGTTGATGATCTATTTATTTGA
COX11	17	53045583	53045782	COX11_9	200	68	TTGTCTTGCACCCCCACC	AGCTCGAACCCTTTCACACG	TTGTCTTGCACCCCCACCTCTCGCGTCTGCGCCACCCTGCGGGCGGCGCCGGCCCCTACCTGGCAATAGAGCCGATAAAGGGGTACGGCAGCGTAGGACGCCCCCAGCATGCCCACGGCGACAGCGGCCACGTAAGTGAGGGTCGTCTTGTTCTGCCGCCGCCGCTCCTCCTCCTGCGCGCGTGTGAAAGGGTTCGAGCT
COX11	17	53045710	53045908	COX11_10	199	65	CCACGTAAGTGAGGGTCGTCTT	CCGTTTCTTAGGCCAGAGTGGA	CCACGTAAGTGAGGGTCGTCTTGTTCTGCCGCCGCCGCTCCTCCTCCTGCGCGCGTGTGAAAGGGTTCGAGCTCTTAGGCCGCCGCGGCGGCTGCAATGCTGGATGCCGGGCTCGAAGGCTGCAGCGCTTCCATGTCCCAAGCCACCTCAGTCCTCTCTCGGCACCTCCTGTCCCACTCCACTCTGGCCTAAGAAACGG
COX11	17	53045863	53046059	COX11_11	197	61	CTCTCTCGGCACCTCCTGTC	GAGATTTGACCTCTCGTCCCTGA	CTCTCTCGGCACCTCCTGTCCCACTCCACTCTGGCCTAAGAAACGGCTCTACCCTCTCTGCAGCCCTGGTTGGAGACCCAGGGTGGATCCAGCGCCAGCCACAGAAAGGAACGCACCTCCATCCAGGACGCCAGAGCCCTCCCATAACCCTCTGAACTAACACCCACCCGCCTCTCAGGGACGAGAGGTCAAATCTC
CDCA7	2	174219639	174219831	CDCA7_1	193	75	CGGCTGCTCCGCTCTC	CTAGGCAGGCCACCAGTTAAG	CGGCTGCTCCGCTCTCCCCGCTCCAAGCGCCGATCTGGGCACCCGCCACCAGCATGGACGCTCGCCGCGTGCCGGTGAGGGCTGGGCGGGCGAACCCGAGGGGCGGGCGCGGTGGGTGCTGGACGCAGGCGGGCGCGGGCCGACCCTCTCCAACTCCGCAGCCTAGCGCTGCCTTAACTGGTGGCCTGCCTAG
CDCA7	2	174223345	174223543	CDCA7_2	199	35	TGTGCTGTTTGAACCTACTAAACTA	GCAAAGCTGTCACAACTGTCAT	TGTGCTGTTTGAACCTACTAAACTAAAAAAAAATGATGTCTTTAGTTAAATAAAGTAAGCATCACGCTTAATAGGATTGCTATTTCCATTTGCAGCAGAAAGATCTCAGAGTAAAGAAGAACTTAAAGAAATTCAGATATGTGAAGTTGATTTCCATGGAAACCTCGTCATCCTCTGATGACAGTTGTGACAGCTTTGC
CDCA7	2	174223435	174223629	CDCA7_3	195	41	TGCAGCAGAAAGATCTCAGAGTAA	CAAAGCATCTGGGGCATTTTGAG	TGCAGCAGAAAGATCTCAGAGTAAAGAAGAACTTAAAGAAATTCAGATATGTGAAGTTGATTTCCATGGAAACCTCGTCATCCTCTGATGACAGTTGTGACAGCTTTGCTTCTGATAATTTTGCAAACACGGTAAGTGCTGCCTGAGAATAAACAGAATTGAGTCTGCAGTGCTCAAAATGCCCCAGATGCTTTG
CDCA7	2	174223889	174224082	CDCA7_4	194	34	TGTAAATGTGATTTGCTCTCTGCAC	GCACCTCACTTTCTGAAAAGCC	TGTAAATGTGATTTGCTCTCTGCACGGTTTATGGAAAATTGGTTCTTGAAAAAGAAAAAAAATGCACAACCGCATTTATTTATTTATTTTACAGAAACCTAAATTCAGGTCAGATATCAGTGAAGAACTGGCAAATGTTTTTTATGAGGACTCTGATAATGAATCTTTCTGCGGCTTTTCAGAAAGTGAGGTGC
CDCA7	2	174224004	174224203	CDCA7_5	200	41	ATCAGTGAAGAACTGGCAAATGT	TCACTCTCTGAGAAACCGCAAAA	ATCAGTGAAGAACTGGCAAATGTTTTTTATGAGGACTCTGATAATGAATCTTTCTGCGGCTTTTCAGAAAGTGAGGTGCAAGATGTATTAGACCATTGTGGATTTTTACAGAAACCAAGGCCAGATGTCACTAACGAACTGGCCGGTATTTTTCATGCCGACTCTGACGATGAATCATTTTGCGGTTTCTCAGAGAGTGA
CDCA7	2	174224067	174224260	CDCA7_6	194	41	TCAGAAAGTGAGGTGCAAGATG	TGTATCTTACTTCTTGAAACTGGTGA	TCAGAAAGTGAGGTGCAAGATGTATTAGACCATTGTGGATTTTTACAGAAACCAAGGCCAGATGTCACTAACGAACTGGCCGGTATTTTTCATGCCGACTCTGACGATGAATCATTTTGCGGTTTCTCAGAGAGTGAGATACAAGATGGAATGGTGAGTTCGAGAATTTCACCAGTTTCAAGAAGTAAGATACA
CDCA7	2	174227894	174228075	CDCA7_7	182	52	AGTTATACTGATGCAGCTTGTCT	TCTGCTTTTTTGTTGGTTGCTCC	AGTTATACTGATGCAGCTTGTCTGCTGATCAAGTCCTAATGACTCAATTGTTGTGATTAGAGGCTGCAGTCAGTTCGGGAAGGCTGTAGGACCCGCAGCCAGTGCAGGCACTCTGGACCTCTCAGGGTGGCGATGAAGTTTCCAGCGCGGAGTACCAGGGGAGCAACCAACAAAAAAGCAGA
CDCA7	2	174227998	174228196	CDCA7_8	199	47	CAGGCACTCTGGACCTCTCA	ACCTACCATTGCTTTGTTTTGCT	CAGGCACTCTGGACCTCTCAGGGTGGCGATGAAGTTTCCAGCGCGGAGTACCAGGGGAGCAACCAACAAAAAAGCAGAGTCCCGCCAGCCCTCAGAGAATTCTGTGACTGATTCCAACTCCGATTCAGAAGATGAAAGTGGAATGAATTTTTTGGAGAAAAGGGCTTTAAATATAAAGCAAAACAAAGCAATGGTAGGT
CDCA7	2	174228049	174228246	CDCA7_9	198	39	CAGGGGAGCAACCAACAAAAAAG	AGTAATGAGTCGCTTAGAGAGGA	CAGGGGAGCAACCAACAAAAAAGCAGAGTCCCGCCAGCCCTCAGAGAATTCTGTGACTGATTCCAACTCCGATTCAGAAGATGAAAGTGGAATGAATTTTTTGGAGAAAAGGGCTTTAAATATAAAGCAAAACAAAGCAATGGTAGGTATCTGACTTTGTGTTAGAATTAATTTTTCCTCTCTAAGCGACTCATTACT
CDCA7	2	174228449	174228635	CDCA7_10	187	42	ACCATGAGATGTACTTGAGTATTTTCC	ACTGGTACTTACTGAGTCGGAGC	ACCATGAGATGTACTTGAGTATTTTCCAGAAGTTAGTTGCTCATTTTCGACAGTTATTCTAAGCCAATGATATCAGTTTAATTTCCTCCCTTTTTAGCTTGCAAAACTCATGTCTGAATTAGAAAGCTTCCCTGGCTCGTTCCGTGGAAGACATCCCCTCCCAGGCTCCGACTCAGTAAGTACCAGT
CDCA7	2	174228564	174228743	CDCA7_11	180	44	GAATTAGAAAGCTTCCCTGGCTC	GGTCCCCTTCGTTTGTCTAGAAG	GAATTAGAAAGCTTCCCTGGCTCGTTCCGTGGAAGACATCCCCTCCCAGGCTCCGACTCAGTAAGTACCAGTTCTTGTTTATATACAGTAGTGTTTTGGGCACACCTAAGGTCGATCTGTGTTGTATTTAAAAATCTAATTTCTTTATTTGTGTGGCCTTCTAGACAAACGAAGGGGACC
CDCA7	2	174229443	174229637	CDCA7_12	195	49	AGGAGAAGCTATGAATTCCCCAA	CGTCAAGGGACCCGAGGA	AGGAGAAGCTATGAATTCCCCAAAGTACTACTTCTCTTTATTATGGAATAAATGGATTCCCTTATACGTGCTTTGTTTAGCAATCAAGGAGACCGCGAAGGCGTACATTCCCGGGTGTTGCTTCCAGGAGAAACCCTGAACGGAGAGCTCGTCCTCTTACCAGGTCAAGGTCCCGGATCCTCGGGTCCCTTGACG
CDCA7	2	174229570	174229755	CDCA7_13	186	53	GAGAAACCCTGAACGGAGAGC	GAGAATCAGAAGAGCAAGTACCA	GAGAAACCCTGAACGGAGAGCTCGTCCTCTTACCAGGTCAAGGTCCCGGATCCTCGGGTCCCTTGACGCTCTACCCATGGAGGAGGAGGAGGAAGAGGATAAGTACATGTTGGTGAGAAAGAGGAAGACCGTGGATGGCTACATGAATGTGAGTTCTCCGCATTGGTACTTGCTCTTCTGATTCTC
CDCA7	2	174230117	174230297	CDCA7_14	181	45	GTTTTGAATCTCTTTCAGTTTTTCAGTTT	CTCGAGAATTGCTGCAGACG	gttttgaatctctttcagtttttcagttttgaagttctgtgtttTGTATTCCTTGTAATGCAGGAAGATGACCTGCCCAGAAGCCGTCGCTCCAGATCATCCGTGACCCTTCCGCATATAATTCGCCCAGTGGAAGAAATTACAGAGGAGGAGTTGGAGAACGTCTGCAGCAATTCTCGAG
CDCA7	2	174230179	174230375	CDCA7_15	197	48	GGAAGATGACCTGCCCAGAAG	GCTCTCTTCCTCTCACAGATGTT	GGAAGATGACCTGCCCAGAAGCCGTCGCTCCAGATCATCCGTGACCCTTCCGCATATAATTCGCCCAGTGGAAGAAATTACAGAGGAGGAGTTGGAGAACGTCTGCAGCAATTCTCGAGAGAAGATATATAACCGTTCACTGGTGAGAGCCTCTAAATTACACCTGAGAATGTAAACATCTGTGAGAGGAAGAGAGC
CDCA7	2	174230947	174231134	CDCA7_16	188	44	TGCCATTTCCTCTGTTGAAAAAC	CTTCACCATAACGGTTTCGAAGG	TGCCATTTCCTCTGTTGAAAAACAGTGGTTTTTTTTGTTTTTTTTCTTAATGGCTTATTTGTAGGGCTCTACTTGTCATCAATGCCGTCAGAAGACTATTGATACCAAAACAAACTGCAGAAACCCAGACTGCTGGGGCGTTCGAGGCCAGTTCTGTGGCCCCTGCCTTCGAAACCGTTATGGTGAAG
CDCA7	2	174231021	174231217	CDCA7_17	197	55	GTCATCAATGCCGTCAGAAGACTA	ATCACAGTTTGTGGCTGACCTTC	GTCATCAATGCCGTCAGAAGACTATTGATACCAAAACAAACTGCAGAAACCCAGACTGCTGGGGCGTTCGAGGCCAGTTCTGTGGCCCCTGCCTTCGAAACCGTTATGGTGAAGAGGTCAGGGATGCTCTGCTGGATCCGGTAGGTGCCTGCCAGGGGTTGGTCCTGTGGGCTTGAAGGTCAGCCACAAACTGTGAT
CDCA7	2	174231788	174231972	CDCA7_18	185	49	ACCATAAAGAAGGGGTTAAATGTAATGT	GCTAAATACACAAGGACCCCAGT	ACCATAAAGAAGGGGTTAAATGTAATGTAGATAAGTTGGTGGGGGAGGTAAGGTTTAACTTAATTGTGCCGTTTGACAATCCTCCTTCAGAACTGGCATTGCCCGCCTTGTCGAGGAATCTGCAACTGCAGTTTCTGCCGGCAGCGAGATGGACGGTGTGCGACTGGGGTCCTTGTGTATTTAGC
CDCA7	2	174231861	174232052	CDCA7_19	192	48	TGACAATCCTCCTTCAGAACTGG	AAATTCAGATGTGGAAGGGAAAAAA	TGACAATCCTCCTTCAGAACTGGCATTGCCCGCCTTGTCGAGGAATCTGCAACTGCAGTTTCTGCCGGCAGCGAGATGGACGGTGTGCGACTGGGGTCCTTGTGTATTTAGCCAAATATCATGGCTTTGGGAATGTGCATGCCTACTTGAAAAGGTAGTGGGTGTTTTTTTTTCCCTTCCACATCTGAATTT
CDCA7	2	174232281	174232440	CDCA7_20	160	33	TTTAAAAATGAATTAGGCTTTCAAAAGAGAA	ACAAGAAAGATTTGAGAAGTAGAAGGC	TTTAAAAATGAATTAGGCTTTCAAAAGAGAATTCTTTGGTTGAAAACTATGTCCTGACACATTTCCTTTTGTTTTTCACAGCCTGAAACAGGAATTTGAAATGCAAGCATAATATCTGGAAAATTTGCTGCCTGCCTTCTACTTCTCAAATCTTTCTTGT
CASP8	2	202122867	202123065	CASP8_1	199	48	TGTTTTCACAGGTTCTCCTCCTTT	CCCTAACCTGCCTAACTCCAC	TGTTTTCACAGGTTCTCCTCCTTTTATCTTTTGTGTTTTTTTTCAAGCCCTGCTGAATTTGCTAGTCAACTCAACAGGAAGTGAGGCCATGGAGGGAGGCAGAAGAGCCAGGGTGGTTATTGAAAGTAAAAGAAACTTCTTCCTGGGAGCCTTTCCCACCCCCTTCCCTGCTGAGCACGTGGAGTTAGGCAGGTTAGGG
CASP8	2	202122965	202123144	CASP8_2	180	56	GCAGAAGAGCCAGGGTGGTTA	TTTCCTGTTGAAGAGGCCACC	GCAGAAGAGCCAGGGTGGTTATTGAAAGTAAAAGAAACTTCTTCCTGGGAGCCTTTCCCACCCCCTTCCCTGCTGAGCACGTGGAGTTAGGCAGGTTAGGGGACTCGGAGACTGCGATGGTGCCAGGAAAGGGTGGAGCGGGTGAGTGCCTGTTGCCAAGGTGGCCTCTTCAACAGGAAA
CASP8	2	202131138	202131333	CASP8_3	196	41	TGGTACTTTTCTTCCTTATCTGAACA	AGGCATCCTTGATGGGTTCTTG	TGGTACTTTTCTTCCTTATCTGAACATACCATTTATTTTGACTTAGATTATATTCTCCTGCCTTTTAAAAAGATGGACTTCAGCAGAAATCTTTATGATATTGGGGAACAACTGGACAGTGAAGATCTGGCCTCCCTCAAGTTCCTGAGCCTGGACTACATTCCGCAAAGGAAGCAAGAACCCATCAAGGATGCCT
CASP8	2	202131249	202131445	CASP8_4	197	47	CTGGACAGTGAAGATCTGGCCTC	AGGTAGGTAATCAGCAAATCCAGT	CTGGACAGTGAAGATCTGGCCTCCCTCAAGTTCCTGAGCCTGGACTACATTCCGCAAAGGAAGCAAGAACCCATCAAGGATGCCTTGATGTTATTCCAGAGACTCCAGGAAAAGAGAATGTTGGAGGAAAGCAATCTGTCCTTCCTGAAGGAGCTGCTCTTCCGAATTAATAGACTGGATTTGCTGATTACCTACCT
CASP8	2	202131353	202131543	CASP8_5	191	48	CCAGGAAAAGAGAATGTTGGAGGA	CCAGTCCCACAATGGGAGTTTC	CCAGGAAAAGAGAATGTTGGAGGAAAGCAATCTGTCCTTCCTGAAGGAGCTGCTCTTCCGAATTAATAGACTGGATTTGCTGATTACCTACCTAAACACTAGAAAGGAGGAGATGGAAAGGGAACTTCAGACACCAGGCAGGGCTCAAATTTCTGCCTACAGGTGGGTGGAAACTCCCATTGTGGGACTGG
CASP8	2	202134157	202134349	CASP8_6	193	51	CTAAAAACCCACAGCCCCAGAA	AGATTTTAAGAGAGATCCTGCCTTATT	CTAAAAACCCACAGCCCCAGAACAAGGAAAGCCGAGGGGGGTCTCATCTTGTGCCCACCATCTTGGTCCTTTGAAGGTTCCACTTCTGCCGCATGAGCTGGGCTGAAGCAAACAGCCAGTGCCAGACACAGTCTGTACCTTTCTGGCGGAGGGTCGATCATCTATTAATAAGGCAGGATCTCTCTTAAAATCT
CASP8	2	202134221	202134404	CASP8_7	184	47	GGTCCTTTGAAGGTTCCACTTCT	ACAAGCAGTAAGTCAGGATTGCC	GGTCCTTTGAAGGTTCCACTTCTGCCGCATGAGCTGGGCTGAAGCAAACAGCCAGTGCCAGACACAGTCTGTACCTTTCTGGCGGAGGGTCGATCATCTATTAATAAGGCAGGATCTCTCTTAAAATCTTTAATGTATTGGCTTAGAGATAAAAGGGTCCGGGCAATCCTGACTTACTGCTTGT
CASP8	2	202136213	202136395	CASP8_8	183	42	TAAAGTGTCTCCATTTCCCACCA	CCTGGCTAACCAAGTCTCAGGA	TAAAGTGTCTCCATTTCCCACCACAGGGTCATGCTCTATCAGATTTCAGAAGAAGTGAGCAGATCAGAATTGAGGTCTTTTAAGTTTCTTTTGCAAGAGGAAATCTCCAAATGCAAACTGGATGATGACATGGTAAGACCTGGTATCTTACTGAGATTTAGTCCTGAGACTTGGTTAGCCAGG
CASP8	2	202137262	202137458	CASP8_9	197	40	GGTCCTTGGTTGGAGAAATTGGA	CTCTTGTTGATTTGGGCACAGAC	GGTCCTTGGTTGGAGAAATTGGAAATTAAAAAAAAAAATCTAATCTAAAAACCAGTAGGGCTCAATCCAGATTCCCAACTTTATTTCTCCTCCTCTTAGAACCTGCTGGATATTTTCATAGAGATGGAGAAGAGGGTCATCCTGGGAGAAGGAAAGTTGGACATCCTGAAAAGAGTCTGTGCCCAAATCAACAAGAG
CASP8	2	202137346	202137542	CASP8_10	197	45	TTCTCCTCCTCTTAGAACCTGCT	TAGAGTAGGTTTTGCCGATTCCC	TTCTCCTCCTCTTAGAACCTGCTGGATATTTTCATAGAGATGGAGAAGAGGGTCATCCTGGGAGAAGGAAAGTTGGACATCCTGAAAAGAGTCTGTGCCCAAATCAACAAGAGCCTGCTGAAGATAATCAACGACTATGAAGAATTCAGCAAAGGTAGAAACAACCTGACAGCCGGGAATCGGCAAAACCTACTCTA
CASP8	2	202137560	202137759	CASP8_11	200	40	TCGCTCCATATCACAGTTGTTTCT	AAGATGTGCATGTGGTAGAAGGC	TCGCTCCATATCACAGTTGTTTCTAATCAAATATTGTTTGGGGTTTCCCCTTTTAATTCAGAGAGAAGCAGCAGCCTTGAAGGAAGTCCTGATGAATTTTCAAATGGTAATGCTTGGAGATACATTTTCAAGATTTAGTTAATTTACTATCTGGTACCTGCATGTGTCCTCCCCACAGCCTTCTACCACATGCACATCTT
CASP8	2	202139519	202139704	CASP8_12	186	44	AGACCTTATGTTGTCCTATGTGC	AAAAAAGGATTTGGAGGTTTCCG	AGACCTTATGTTGTCCTATGTGCTACATATTTCATTACCAGTGTACCTTTCCTGCCATGTCTCATTCTAGATGTGTCTCTTCGTTGTTTGCAGGGGAGGAGTTGTGTGGGGTAATGACAATCTCGGACTCTCCAAGAGAACAGGATAGTGAATCACAGGTAGACGGAAACCTCCAAATCCTTTTTT
CASP8	2	202141457	202141656	CASP8_13	200	43	GGAAAGCAAGTCCTCTTACTAGGG	CTGTGAAGTTTGGGCACTTTCTC	GGAAAGCAAGTCCTCTTACTAGGGAGTTGTTTGTTTACATCTCTAGTGTTTGACCCACAGAGTCAGCTCCTGGGTTGGGTTTTTGTTTTCCAGACTTTGGACAAAGTTTACCAAATGAAAAGCAAACCTCGGGGATACTGTCTGATCATCAACAATCACAATTTTGCAAAAGCACGGGAGAAAGTGCCCAAACTTCACAG
CASP8	2	202141573	202141772	CASP8_14	200	39	GAAAAGCAAACCTCGGGGATACT	AGCTTTTGTTCTCTCCCTTTTGA	GAAAAGCAAACCTCGGGGATACTGTCTGATCATCAACAATCACAATTTTGCAAAAGCACGGGAGAAAGTGCCCAAACTTCACAGCATTAGGGACAGGAATGGAACACACTTGGATGCAGGTACAGTAGAACCCAAaagagaaaagtaaaatatttcttatgcctatttttttttaaatcaaaagggagagaacaaaagct
CASP8	2	202149480	202149666	CASP8_15	187	43	CCAGCTGTGGTCTGTGAATTACT	GAAGCAGTCCATGTTACTGTGGT	CCAGCTGTGGTCTGTGAATTACTGTGGTATAACGTGACTGTTCAAATTTCACTTTTCAGGGGCTTTGACCACGACCTTTGAAGAGCTTCATTTTGAGATCAAGCCCCACGATGACTGCACAGTAGAGCAAATCTATGAGATTTTGAAAATCTACCAACTCATGGACCACAGTAACATGGACTGCTTC
CASP8	2	202149590	202149775	CASP8_16	186	47	ATGACTGCACAGTAGAGCAAA	AAGGGCACTTCAAACCAGTGAA	ATGACTGCACAGTAGAGCAAATCTATGAGATTTTGAAAATCTACCAACTCATGGACCACAGTAACATGGACTGCTTCATCTGCTGTATCCTCTCCCATGGAGACAAGGGCATCATCTATGGCACTGATGGACAGGAGGCCCCCATCTATGAGCTGACATCTCAGTTCACTGGTTTGAAGTGCCCTT
CASP8	2	202149666	202149865	CASP8_17	200	49	CATCTGCTGTATCCTCTCCCAT	CCTCTGAATCAGTCTCAACAGGT	CATCTGCTGTATCCTCTCCCATGGAGACAAGGGCATCATCTATGGCACTGATGGACAGGAGGCCCCCATCTATGAGCTGACATCTCAGTTCACTGGTTTGAAGTGCCCTTCCCTTGCTGGAAAACCCAAAGTGTTTTTTATTCAGGCTTGTCAGGGGGATAACTACCAGAAAGGTATACCTGTTGAGACTGATTCAGAGG
CASP8	2	202149783	202149981	CASP8_18	199	44	TGGAAAACCCAAAGTGTTTTTTATTCA	AGGGTTTCGGTAGGAAACACAG	TGGAAAACCCAAAGTGTTTTTTATTCAGGCTTGTCAGGGGGATAACTACCAGAAAGGTATACCTGTTGAGACTGATTCAGAGGAGCAACCCTATTTAGAAATGGATTTATCATCACCTCAAACGAGATATATCCCGGATGAGGCTGACTTTCTGCTGGGGATGGCCACTGTGAATAACTGTGTTTCCTACCGAAACCCT
CASP8	2	202149884	202150075	CASP8_19	192	51	TGGATTTATCATCACCTCAAACGAG	GTAACAGTGAGGAGGGCTGAGTA	TGGATTTATCATCACCTCAAACGAGATATATCCCGGATGAGGCTGACTTTCTGCTGGGGATGGCCACTGTGAATAACTGTGTTTCCTACCGAAACCCTGCAGAGGGAACCTGGTACATCCAGTCACTTTGCCAGAGCCTGAGAGAGCGATGTCCTCGGTAAGTTTTGCCTACTCAGCCCTCCTCACTGTTAC
CASP8	2	202151108	202151292	CASP8_20	185	43	GAGCACAGCAGAGGAGACAG	TTTCTTAGTGTGAAAGTAGGCTGA	GAGCACAGCAGAGGAGACAGTTCATCAGTTGCTTTCCCCCACAGACAGTCACAATATTATGTGATGTATTTCAGAGGCGATGATATTCTCACCATCCTGACTGAAGTGAACTATGAAGTAAGCAACAAGGATGACAAGAAAAACATGGGGAAACAGATGCCTCAGCCTACTTTCACACTAAGAAA
CASP8	2	202151183	202151340	CASP8_21	158	39	GGCGATGATATTCTCACCATCCT	ACAAAACAAACAAAATAGCACCATCA	GGCGATGATATTCTCACCATCCTGACTGAAGTGAACTATGAAGTAAGCAACAAGGATGACAAGAAAAACATGGGGAAACAGATGCCTCAGCCTACTTTCACACTAAGAAAAAAACTTGTCTTCCCTTCTGATTGATGGTGCTAttttgtttgttttgt
IGFBP5	2	217541377	217541564	IGFBP5_1	188	63	GAGATGAAATGAGTGGCGTCCTG	CGTGGACAAGTACGGGATGAAG	GAGATGAAATGAGTGGCGTCCTGGGGTGGAGGGAGGCGCTGGCTGGAGTCGGGGCTGGGGGTGGGAGGGGGTGAGGGAAAGGTTGGGGGGGGACGCATCACTCAACGTTGCTGCTGTCGAAGGTGTGGCACTGAAAGTCCCCGTCAACGTACTCCATGCCTGGCAGCTTCATCCCGTACTTGTCCACG
IGFBP5	2	217541492	217541691	IGFBP5_2	200	63	GTCGAAGGTGTGGCACTGAAAG	CCTTGGGGTAGACAAGAGGC	GTCGAAGGTGTGGCACTGAAAGTCCCCGTCAACGTACTCCATGCCTGGCAGCTTCATCCCGTACTTGTCCACGCACCAGCAGATGCCACGTTTGCGGCCACGGGAAGGTTTGCACTGGGGTGAGTAGAGCAACAGGCGGTGAGGACGGCCGCACCCCAGGGCTCTGCTCCTCCCTGCCCTGCCTCTTGTCTACCCCAAGG
IGFBP5	2	217542729	217542918	IGFBP5_3	190	56	TAAGTGGTTAACGGTGGAAACCT	GAGCTCAAAGCCAGCCCAC	TAAGTGGTTAACGGTGGAAACCTTAGGCACTTGCCCAAGGTGGAGTTTCCTGGCAGGTGCCATTTTTGGAGCAGTCTGAGCCTGGAGCTCAGGGCAGGGGACGTACCTGCTTTCTCTTGTAGAATCCTTTGCGGTCACAATTGGGCAGGTACACAGCACGGGGCACCATGCGTGGGCTGGCTTTGAGCTC
IGFBP5	2	217542827	217543007	IGFBP5_4	181	61	GGACGTACCTGCTTTCTCTTGTA	CTGGGTGGTTTTCCCTTGGTC	GGACGTACCTGCTTTCTCTTGTAGAATCCTTTGCGGTCACAATTGGGCAGGTACACAGCACGGGGCACCATGCGTGGGCTGGCTTTGAGCTCCTGCAGGGAAGCCTCCATGTGTCTGCGGCAGGGGCCCTGTGTGGACAGGAGGGTGAGAGGCGTGGCGAGACCAAGGGAAAACCACCCAG
IGFBP5	2	217543505	217543685	IGFBP5_5	181	54	TGAATGTCCATTTAGATGCAGGA	TGAAGAAGGACCGCAGAAAGAAG	TGAATGTCCATTTAGATGCAGGAAAAGGTCAAAAGCTGGGAGGGAATGAGGGAATCCCCGAGATGCACCTGCTCAGACTCCTGTCTCATCTCAGGTGCAGAGATGATCCGGGGGTGGGCAGTGTTCTCGGCTCCCCCGACAAACTTGGACTGGGTCAGCTTCTTTCTGCGGTCCTTCTTCA
IGFBP5	2	217543561	217543755	IGFBP5_6	195	59	CCCGAGATGCACCTGCT	GAGGAGACCTACTCCCCCAAGAT	CCCGAGATGCACCTGCTCAGACTCCTGTCTCATCTCAGGTGCAGAGATGATCCGGGGGTGGGCAGTGTTCTCGGCTCCCCCGACAAACTTGGACTGGGTCAGCTTCTTTCTGCGGTCCTTCTTCACTGCTTCAGCCTTCAGCTCGGAGATGCGGGTGTGTTTGGGCCGGAAGATCTTGGGGGAGTAGGTCTCCTC
IGFBP5	2	217543648	217543829	IGFBP5_7	182	60	CTTGGACTGGGTCAGCTTCTTTC	CTGACCCTCCGGCTCCTTC	CTTGGACTGGGTCAGCTTCTTTCTGCGGTCCTTCTTCACTGCTTCAGCCTTCAGCTCGGAGATGCGGGTGTGTTTGGGCCGGAAGATCTTGGGGGAGTAGGTCTCCTCGGCCATCTCAGAGGTGGTGGGCTCCTCGTGCTCACGGGAGTCTCTCTCTGCAGGAGAAGGAGCCGGAGGGTCAG
IGFBP5	2	217559100	217559299	IGFBP5_8	200	70	AGCCGGTCTCGTGTCCC	GCGGCGTCTACACCGAG	AGCCGGTCTCGTGTCCCCCGCCCGTGCGCCGCGTAACTGACTGGCACACTGAGCGCGCTCACCGATCTTGACTTGCTCGCGGTAGCTCTTTTCGTTGAGGCAAACCCCGCGGCCGTGCAGCAGGGCGTGCAGCGGCTTCTCCTCGTCCTGCCGGGGGAGGCAGCGCAGCCCCTGGGCGCAGCGCTCGGTGTAGACGCCGC
IGFBP5	2	217559182	217559367	IGFBP5_9	186	72	TAGCTCTTTTCGTTGAGGCAAAC	CTGCGAGCTGGTCAAGGAG	TAGCTCTTTTCGTTGAGGCAAACCCCGCGGCCGTGCAGCAGGGCGTGCAGCGGCTTCTCCTCGTCCTGCCGGGGGAGGCAGCGCAGCCCCTGGGCGCAGCGCTCGGTGTAGACGCCGCACGACTGCCCCTCGGCCAGGGCGCAGGTCATGCAGCAGCCGCAGCCCGGCTCCTTGACCAGCTCGCAG
IGFBP5	2	217559287	217559472	IGFBP5_10	186	73	GTGTAGACGCCGCACGA	GCTGCTGGCCGCCTATG	GTGTAGACGCCGCACGACTGCCCCTCGGCCAGGGCGCAGGTCATGCAGCAGCCGCAGCCCGGCTCCTTGACCAGCTCGCAGCCCAGGGGGCTGGGGGGGCACATGGAGAGGGCTTTCTCGTCGCAGGGCTCGCAGTGCACGAAGGAGCCCAGGCTCTGGGCCGGCCCCGCATAGGCGGCCAGCAGC
IGFBP5	2	217559341	217559534	IGFBP5_11	194	70	CAGCCCGGCTCCTTGA	GCCCCACCCCGAGGTAAA	CAGCCCGGCTCCTTGACCAGCTCGCAGCCCAGGGGGCTGGGGGGGCACATGGAGAGGGCTTTCTCGTCGCAGGGCTCGCAGTGCACGAAGGAGCCCAGGCTCTGGGCCGGCCCCGCATAGGCGGCCAGCAGCAGGAGGACCGCGGTGAGCAACACCATCTTCTCTTAGTCGCCCCCTTTACCTCGGGGTGGGGC
MKL1	22	40807341	40807540	MKL1_1	200	62	ATTGGAGTACCCTGGCTCCC	CACCTGGACAGCATGGACTG	ATTGGAGTACCCTGGCTCCCAGCCCCTTCCCCACCCCGTCTTGAGCCAGAGAGCTACAAGCAGGAATCCCAGTGCAGCTGCAAATCATGGCCATCGAGGAAGTCTGTGGAGAAGAGGCTGGGGGCTGTGGTGCTGAGGGGGGCTAGGCTCAGCACGGGACCACCTGACGACAGCTCCAGCCAGTCCATGCTGTCCAGGTG
MKL1	22	40807501	40807684	MKL1_2	184	61	CACCTGACGACAGCTCCAG	CCCCTTTCCCTCATTGACGAC	CACCTGACGACAGCTCCAGCCAGTCCATGCTGTCCAGGTGGCCATCAGCCAGGTCCAGGCCCATGGTGCTGCTGGGCTCAGGAACAAAGTGCAATTCCGAGGTGTCCATGGGTGACGGGGGGTGGTCCAGGATGGCAGTGCTGCTCAGCATCTGGCTATGGAGGTCGTCAATGAGGGAAAGGGG
MKL1	22	40807579	40807758	MKL1_3	180	63	CAGGAACAAAGTGCAATTCCGAG	CTGGACGCCTGGAGGACTT	CAGGAACAAAGTGCAATTCCGAGGTGTCCATGGGTGACGGGGGGTGGTCCAGGATGGCAGTGCTGCTCAGCATCTGGCTATGGAGGTCGTCAATGAGGGAAAGGGGCTCTGGCCCGTCATGCCCACTGGTCAGCAGGGGCAGCCCCGTGCTGCTCTCCAGGAAGTCCTCCAGGCGTCCAG
MKL1	22	40807669	40807867	MKL1_4	199	67	CAATGAGGGAAAGGGGCTCTG	GAGAAGCCATCCCCGAAGAC	CAATGAGGGAAAGGGGCTCTGGCCCGTCATGCCCACTGGTCAGCAGGGGCAGCCCCGTGCTGCTCTCCAGGAAGTCCTCCAGGCGTCCAGGGAGGGAGGGTGAGCCTGGAGGAGGTGGGGCAGCCTGGGGGAGCTCAGCAGAAGGTGATGGCTGTGCTGCCAGGGGGGACCCACAGACTGTCTTCGGGGATGGCTTCTC
MKL1	22	40807767	40807956	MKL1_5	190	57	GGTGAGCCTGGAGGAGGT	agGCTTGGCTTCTGATATCCATT	GGTGAGCCTGGAGGAGGTGGGGCAGCCTGGGGGAGCTCAGCAGAAGGTGATGGCTGTGCTGCCAGGGGGGACCCACAGACTGTCTTCGGGGATGGCTTCTCCTTCCCTGGCAGGGATGGCGGCTCCTTGAAATCTGCTGAAATTTCTGCCAATCAATCAAGAGAGTAAATGGATATCAGAAGCCAAGCct
MKL1	22	40812927	40813121	MKL1_6	195	50	AGGGCTAGAGACACCTATGAACA	CATTCGTAGTTCGGGCTGGG	AGGGCTAGAGACACCTATGAACAGAGAAGGCCGTCAGGGAGGCAGCAGGGGACCTGGGGTTACCTCCGCTCTGAATGAGAATGTCAAACAGGTCGTCCATCTGCTGGCTTGAGGAACCATTTTCCTGTGGGACAAAGGAAAAAAAAAAAAGAGATAAAAATCTTGAATGGGGGCTCCCAGCCCGAACTACGAATG
MKL1	22	40813275	40813456	MKL1_7	182	62	CTGTAGGAGCCTCAGCCCAG	CCAGATGGACCTGGAGCAC	CTGTAGGAGCCTCAGCCCAGCAGCCTAGGGCAGCTGCCAACACTAGCCAGGCCTAGCCCGCCTTCCTCACCTGCTGTTTGGGCTGCTGGCTCATGGCTTCCTCATAGCCAGGTGGTTCCTTCTTCAGCAGAGAAGTGGGGGTCCCAAAGAGGGGCTGCAGTGGGTGCTCCAGGTCCATCTGG
MKL1	22	40813334	40813525	MKL1_8	192	64	GCCTTCCTCACCTGCTGTTTG	CTGGTCCTCTCCCTGCTCT	GCCTTCCTCACCTGCTGTTTGGGCTGCTGGCTCATGGCTTCCTCATAGCCAGGTGGTTCCTTCTTCAGCAGAGAAGTGGGGGTCCCAAAGAGGGGCTGCAGTGGGTGCTCCAGGTCCATCTGGGCAGAGGGGGCAGGCGCTGGAGAGCCAGGCTGGGACGAGGGCTGGACAGGAGAGCAGGGAGAGGACCAG
MKL1	22	40814304	40814488	MKL1_9	185	64	CCCAAGAGGGCTGTAGCG	GGGGTTGCACCTCCCAC	CCCAAGAGGGCTGTAGCGAGACGCTCTTCCCACCCTCCTCTGGGCCCTGCCCGGTTCCTCCCATACCCAGGTACCTGCTGGGGGCTCCCACTGGACAGGCCAGGGCTGTCTGCATTCTTATTGGTCACGGTGAGGACAAGGTGGGTCCCTGTGGAGTCGGTGATGAGGGTGGGAGGTGCAACCCC
MKL1	22	40814406	40814587	MKL1_10	182	65	GGGCTGTCTGCATTCTTATTGGT	CCGTCCGTGGTGGTGAAG	GGGCTGTCTGCATTCTTATTGGTCACGGTGAGGACAAGGTGGGTCCCTGTGGAGTCGGTGATGAGGGTGGGAGGTGCAACCCCCTTGATGAGGCTGGGGCCCTGAGGCCCCAGAAGCAACTGGGGGGCGGGGACCGGCTCGGGCTCAGGCTGCAAGGCTTCCTGCTTCACCACCACGGACGG
MKL1	22	40814545	40814730	MKL1_11	186	69	CGGGCTCAGGCTGCAAG	TCGGCACCCCCGTGAA	CGGGCTCAGGCTGCAAGGCTTCCTGCTTCACCACCACGGACGGGGGCCCCGGGGCCACAGCACAAGGGTCTATGTGGTTGGTGGCTGGGGCCGCCAGGCTGGGGTTGAATGGGTGAGCGGGGCCCAGGGGCTGCTGGCTCAGCTGGCAGCTGGAGAAGCTGTTCTCCTGCTTCACGGGGGTGCCGA
MKL1	22	40814689	40814868	MKL1_12	180	68	GGCAGCTGGAGAAGCTGTT	AGATGCTGCAGGAGAAAGACAAG	GGCAGCTGGAGAAGCTGTTCTCCTGCTTCACGGGGGTGCCGAGgggggcgggggcgggggcgggCTGCTGGGCTCGCTTCTCCTGCTCCAGCTGCAGCTTGAGCCGCTCCACCAGCTGCTGCTTCTGCCGGAGCATGCGCGTCAGCGCCTCGATCTGCTTGTCTTTCTCCTGCAGCATCT
MKL1	22	40814753	40814932	MKL1_13	180	68	CTGCTGGGCTCGCTTCT	CGGGCCGGGTCCTGTT	CTGCTGGGCTCGCTTCTCCTGCTCCAGCTGCAGCTTGAGCCGCTCCACCAGCTGCTGCTTCTGCCGGAGCATGCGCGTCAGCGCCTCGATCTGCTTGTCTTTCTCCTGCAGCATCTGGTCCTTGTCGCGCCCCTCTAGCTCCGCCCGCCCCCCAGGGCTCAGGCAACAGGACCCGGCCCG
MKL1	22	40814836	40815023	MKL1_14	188	65	CCTCGATCTGCTTGTCTTTCTCC	GGACACCTTTGGTGAGATGGTG	CCTCGATCTGCTTGTCTTTCTCCTGCAGCATCTGGTCCTTGTCGCGCCCCTCTAGCTCCGCCCGCCCCCCAGGGCTCAGGCAACAGGACCCGGCCCGGGGGCCCTCCTCCTTCACGAGGATCTGCAGTGGCGAGGCCTGCAGGGTCAGCTGCGTCAGAGGTGATGTCACCATCTCACCAAAGGTGTCC
MKL1	22	40814909	40815108	MKL1_15	200	68	GCTCAGGCAACAGGACCC	GCAGCACGGGCTCCAC	GCTCAGGCAACAGGACCCGGCCCGGGGGCCCTCCTCCTTCACGAGGATCTGCAGTGGCGAGGCCTGCAGGGTCAGCTGCGTCAGAGGTGATGTCACCATCTCACCAAAGGTGTCCCCGGGGGTGGAGTTTTCATCGCCCGTGCTGAGCAGTGAGCGCTCCGAGGGGGTGGGAGACACGGGGGGCGTGGAGCCCGTGCTGC
MKL1	22	40815027	40815226	MKL1_16	200	71	GGGGTGGAGTTTTCATCGC	GTGGTGGTAGCCTTCCCAG	GGGGTGGAGTTTTCATCGCCCGTGCTGAGCAGTGAGCGCTCCGAGGGGGTGGGAGACACGGGGGGCGTGGAGCCCGTGCTGCCAAACTTCACCACCCCACTGCTGGCCACCGTGGCCACCACCACCTCAGCTGGAGCCAGGCCTGCTGCCACCAGGGCTGGCCCCGTGCTCAGCCGGGCCGCTGGGAAGGCTACCACCAC
MKL1	22	40815141	40815330	MKL1_17	190	67	GCCACCACCACCTCAGC	CTGAGCTGATTGAGCGCCTTC	GCCACCACCACCTCAGCTGGAGCCAGGCCTGCTGCCACCAGGGCTGGCCCCGTGCTCAGCCGGGCCGCTGGGAAGGCTACCACCACCTCGCCAGCCTTGTGCAGGATAGAGGTGGCGGCAGGGGCCTTGGGGGCTCCTGGCACAGGGCTGATTTGGTCTTGATAGGCTCGAAGGCGCTCAATCAGCTCAG
MKL1	22	40815235	40815414	MKL1_18	180	59	CCTTGTGCAGGATAGAGGTGG	CTCCCTGACTCTTGACTGCCTT	CCTTGTGCAGGATAGAGGTGGCGGCAGGGGCCTTGGGGGCTCCTGGCACAGGGCTGATTTGGTCTTGATAGGCTCGAAGGCGCTCAATCAGCTCAGTTTTGGTGCCCGAGACAGGCAGTGATCGCAACTTCAGCTCCTGCTTCAGCTCTGCCACCTGCAAGGCAGTCAAGAGTCAGGGAG
MKL1	22	40816331	40816529	MKL1_19	199	63	CCTAAAAACCAGCACCCAGACAG	CTCCACTACCAATAGCAGCTCCA	CCTAAAAACCAGCACCCAGACAGCCCCTGTGGGAAGGGCCAGGCTGGCAGTGGCTCAAGTTTTCCAGTGGCCATGTACCTTCATGTCGTCCAGGTTGGCCGGCAGGGCTCCCGGCTTGCCAGTCAGTGAGGTGCTGTTCTGACGTGCCAGCCCACAGGGCCCAGGGGCGCCCGAGCTGGAGCTGCTATTGGTAGTGGAG
MKL1	22	40816449	40816630	MKL1_20	182	65	CCAGTCAGTGAGGTGCTGTTC	GAGGCCACGGGCGAAG	CCAGTCAGTGAGGTGCTGTTCTGACGTGCCAGCCCACAGGGCCCAGGGGCGCCCGAGCTGGAGCTGCTATTGGTAGTGGAGAGGCTGCGTACTGGGGGGGTCCCGCTGCTTCCCAGGGCCTCGCCTGCTGACCTGGGAAGAAAAGGCAGAAATTAGCCCCATCCAGCTTCGCCCGTGGCCTC
MKL1	22	40816768	40816966	MKL1_21	199	65	TTCACCCCCACCAGACCT	GACTCATCCTACGCCAAGATCC	TTCACCCCCACCAGACCTGGCACCTGCCTGGCTCAGGGTGGCTCGGGGAGGGCAGGGGCAGGCAGTGAGGAGCGGGTGCCTACTTTGGCGGGGCAGGCAGGATGGCCTGGTAGTTGTGGTGCTGCTGCTGCTGCTGGTTGAGGATCTGCAGCTGGAGGAAGAGCTGCTGCTGCTGCAGGATCTTGGCGTAGGATGAGTC
MKL1	22	40816865	40817045	MKL1_22	181	60	CAGGATGGCCTGGTAGTTGTG	GAAGCCAAAGGTGAAGAAGCTCA	CAGGATGGCCTGGTAGTTGTGGTGCTGCTGCTGCTGCTGGTTGAGGATCTGCAGCTGGAGGAAGAGCTGCTGCTGCTGCAGGATCTTGGCGTAGGATGAGTCCATGGGGGGTGCCCCCCTGTCCTGCTTCTGGTCCGGGGGGATGTACTGGTGGTACTTGAGCTTCTTCACCTTTGGCTTC
MKL1	22	40816943	40817137	MKL1_23	195	59	CAGGATCTTGGCGTAGGATGAG	CCCTGAATGGCACCCTGTC	CAGGATCTTGGCGTAGGATGAGTCCATGGGGGGTGCCCCCCTGTCCTGCTTCTGGTCCGGGGGGATGTACTGGTGGTACTTGAGCTTCTTCACCTTTGGCTTCAGCTCCTTGGCCTTCTTGCTGCGCTGTGACTTCTCACTGGCAGACTTGGGTTGGCTTTGCTGAGGGCACAGGAGACAGGGTGCCATTCAGGG
MKL1	22	40819468	40819666	MKL1_24	199	57	CTGGAATGAAGTCACAGCAGGA	CCGGGATTCCAGAGAAATGCTT	CTGGAATGAAGTCACAGCAGGACTCCAAAGGGCACAGGGAAGGGGAGGGTACAATCACTGGCAGAAATGTACCTTAATGAGTGTGGGGGTGGACTTGGCAGTGGGGATAGTGGTTCCATTGGTGAGGCTGGGAGGCAGCAGAGGTGGGGGAGGCAGAGGAGGCTGCTCTGCCAGGAAAAGCATTTCTCTGGAATCCCGG
MKL1	22	40819518	40819717	MKL1_25	200	55	ACAATCACTGGCAGAAATGTACC	TGTCCTCACTTCCCTTTTTCCCT	ACAATCACTGGCAGAAATGTACCTTAATGAGTGTGGGGGTGGACTTGGCAGTGGGGATAGTGGTTCCATTGGTGAGGCTGGGAGGCAGCAGAGGTGGGGGAGGCAGAGGAGGCTGCTCTGCCAGGAAAAGCATTTCTCTGGAATCCCGGCCCATCGGAAGTTGAGACACAACCTGAGAGGGAAAAAGGGAAGTGAGGACA
MKL1	22	40820159	40820354	MKL1_26	196	63	CGCAGCCCTAGCACCTT	CAGCTCTTCCTTCGATGAGGAC	CGCAGCCCTAGCACCTTGGAGCTGGGGAAGCATCTGGAAGCACACACTCACCTGGGTGGGGGATGCAGAGGTGGCACTGAGCAGTGGTTCGCTGACTCGGGCCTCCAGGGGTGACGGCACAGAACCCTGGGACTCATGGCTGGCAGGCTGCTCGGGGGATAAGGCATCGCTGCTGTCCTCATCGAAGGAAGAGCTG
MKL1	22	40820235	40820420	MKL1_27	186	59	CTGAGCAGTGGTTCGCTGAC	TGGAAGTGGAATCTCACACCAG	CTGAGCAGTGGTTCGCTGACTCGGGCCTCCAGGGGTGACGGCACAGAACCCTGGGACTCATGGCTGGCAGGCTGCTCGGGGGATAAGGCATCGCTGCTGTCCTCATCGAAGGAAGAGCTGTCTGCTACTTTGGGATAGTTCACCTGGCCCACTGAAACCCAAAGCTGGTGTGAGATTCCACTTCCA
MKL1	22	40825516	40825714	MKL1_28	199	57	TCAAGAGCCTCAGCCCAATTC	TAGCCGATGACCTCAATGAGAAG	TCAAGAGCCTCAGCCCAATTCTGCTTCAGCCTGGCACTCCCTCCCCTCCTGCATCTCAGCTGCCTCTCACACAGGGTGGCTGGGTCCTCCTCACCAATGATGGCTTCCTTCAGGCTGGACTCAACAGGAAGGATGTTCTTCTCCACCAGCTCCATGGGGCCAGGCCTCTGTGCAATCTTCTCATTGAGGTCATCGGCTA
MKL1	22	40825630	40825810	MKL1_29	181	56	CTGGACTCAACAGGAAGGATGTT	TCATATATCTTCCTGCACCCCTT	CTGGACTCAACAGGAAGGATGTTCTTCTCCACCAGCTCCATGGGGCCAGGCCTCTGTGCAATCTTCTCATTGAGGTCATCGGCTAGTCTGGCTCTCTTCAGCTTCAGCTGCTTGGCCTGGAGGGATGGCTCAGCCGAGGTCTCTGCCCATGGGAGAGAAAGGGGTGCAGGAAGATATATGA
MKL1	22	40827333	40827529	MKL1_30	197	47	GGAAATGGGTAGTGCAGTAGTGA	CCTGTGACCTGGATTTGAGAGTTT	GGAAATGGGTAGTGCAGTAGTGAGTACACACAGTGAGAACTGGATCTAGATGGAAAAGCAATTCCAATCTCCACACCTTCCAAAATGTGCATCCTGACCAGCTCCGATCTCTCCGGCCGGGAACGAATCTTCCGTTTGAGATAGTCCTCTGTCTACAGAAAAAACACACCAAGAAACTCTCAAATCCAGGTCACAGG
MKL1	22	40831439	40831637	MKL1_31	199	47	CAGCAATGCAATGAGCTCTGAAA	ATGCCTTCTCCACTGAATATCGT	CAGCAATGCAATGAGCTCTGAAAATGCTCTTTGGGAGTTCTGAGGGGGAAAAAAGGTACCTTACCCTGGCCCGCTCCAAGCTCCTTCTCTGCTCATGAAATGCGGCTGGACTTTTCAAAGCTGTTGAGAGAAGAACCGTAAAGATTACCTTCAAGCGAAGCATCATGTCTAGTGCTACGATATTCAGTGGAGAAGGCAT
MKL1	22	40859168	40859347	MKL1_32	180	54	GAACACAGCCATGTCCTAAAAGC	TTGAGGTGGAATACCCAACTGAC	GAACACAGCCATGTCCTAAAAGCAATCTACCAAATGCTGAGAGAGAGAGGCACTTACGCGGCATGATCCCTTGGCTCACCAGTTCTTCCCGGGTCCGGCGCTGCTGGAGTTTCAACTGTAGCACTGCAGGGCAGCAGAGAGAGAGGAGAGATGAGGGGTCAGTTGGGTATTCCACCTCAA
NEK10	3	27257246	27257432	NEK10_1	187	49	CATGATGGCATTTGCTTCTTGGG	AATTTCTCCCTTGGTGCTGTTCT	catgatggcatttgcttcttgggaggcatcaggaagcttccaatgatagcagaaggcaaaggaggagccagcacgttttatgtggccagagcaggagcaggagagcgaaggtagaggtgctgcacactttaaacaaccagatcacacgaaaactcaccatcatgagaacagcaccaagggagaaatt
NEK10	3	27297742	27297927	NEK10_2	186	37	TCAGTTAAGTATGATGTTTGAGAGCC	TGCTAAGGAACAATGATAACTCTGGG	TCAGTTAAGTATGATGTTTGAGAGCCATAAAAGAATTGTCCTTACCAAGAATACAGGATTGTTCCAACCACAGAGGTGAGTTTACTGTTTTCTTGTTTTTGCTTTGCCAGGCCAAAGTCAGCTACAATTCACAAAACAACGCAATATGTTACTATATTTTCCCAGAGTTATCATTGTTCCTTAGCA
NEK10	3	27326020	27326203	NEK10_3	184	37	ctactggacaCTACTACTCTAGGAT	GTTTCAAGCTGTGCTTAGCTCTT	ctactggacaCTACTACTCTAGGATAGTATTCAGGAATTCTTCAGTTAAAAGTTTAAAAATCTTTATACTTACTAACGGTTACTTTGTCCTTATCCCCCAACATAATGTTGTTTGGTGTCAGATCTCTATGGACAATCCTCTTCTCCTTGTGTAAGTATCGAAGAGCTAAGCACAGCTTGAAAC
NEK10	3	27326101	27326297	NEK10_4	197	39	ACTTTGTCCTTATCCCCCAACAT	ACAGTAATGTTCTGAGCTGGCTT	ACTTTGTCCTTATCCCCCAACATAATGTTGTTTGGTGTCAGATCTCTATGGACAATCCTCTTCTCCTTGTGTAAGTATCGAAGAGCTAAGCACAGCTTGAAACAATGAATAGAAAACAAATTTTATTTCCCCCAACATACATATAGCCAAAGATGACTACTGCACGTCTTTAAGAAGCCAGCTCAGAACATTACTGT
NEK10	3	27326247	27326435	NEK10_5	189	36	CCAAAGATGACTACTGCACGTCT	GTTATGGAGCTGATAGAAGGAGCC	CCAAAGATGACTACTGCACGTCTTTAAGAAGCCAGCTCAGAACATTACTGTTTTAAGAAAAATTTAATGAAGATAAAAGCATACCTGTATAAATATTTTCCATAGTCTTTCTTCAGTAAAATGGTGATGTTTTTCCTTCAAAGAACTGAAATGCTCTCCAAGCGGGGCTCCTTCTATCAGCTCCATAAC
NEK10	3	27326350	27326542	NEK10_6	193	37	AGTCTTTCTTCAGTAAAATGGTGATGT	CACTGGGAAGCTTGAACTCTCAT	AGTCTTTCTTCAGTAAAATGGTGATGTTTTTCCTTCAAAGAACTGAAATGCTCTCCAAGCGGGGCTCCTTCTATCAGCTCCATAACTATGTACAACCTATCATCTATATAAATATCACAAAAGGTCACAGAAATTTAAACTCAATACAGGCATCTTGAAAAACTTTACGAATGAGAGTTCAAGCTTCCCAGTG
NEK10	3	27329103	27329260	NEK10_7	158	26	AGGTTTCTTTTGTGACATTCTGATAC	CATGTTTGTTATTTATTTTCTTATAGCTTTATCATC	AGGTTTCTTTTGTGACATTCTGATACAAAAATATATGTGACAAAAATGTTTCCTTATTTAGAAATATCATGAAAACTCATACTTACTTTCCAGAAATGTTTTGTAATAACGTACAATGTTGGGATGATAAAGCTATAAGAAAATAAATAACAAACATG
NEK10	3	27329198	27329377	NEK10_8	180	26	ATGTTTTGTAATAACGTACAATGTTGGGATGATA	TCGATGATATCTTGAAATGCTTAGTTTTG	ATGTTTTGTAATAACGTACAATGTTGGGATGATAAAGCTATAAGAAAATAAATAACAAACATGTATTGCACTGCTTCAAAATACAAGTTTTTTCACTGACTACTTAGTTGGACTTCATATTTGAAAACTACAAAGAAATTATATTTATTTACAAAACTAAGCATTTCAAGATATCATCGA
NEK10	3	27332027	27332207	NEK10_9	181	35	GGACAAGAGCACCACAACTCTAC	AGAGGTCAATTTACATAACCCAGCAT	GGACAAGAGCACCACAACTCTACTTTCTTGCAATGACATGTATTTAAGAAAAACATCTTCAGAAACAAGGAAAACATTTACCTGCTCTTTAATTATTGTTAATTCAGAAACAATATTCCTTACGCTGCTGTCTCGATCTTTCTTATCCTTTCCAAATGCTGGGTTATGTAAATTGACCTCT
NEK10	3	27332095	27332280	NEK10_10	186	32	GGAAAACATTTACCTGCTCTTTAATTATTGTT	TCCTTTTGTTGTTGTTGTGTTTTTCT	GGAAAACATTTACCTGCTCTTTAATTATTGTTAATTCAGAAACAATATTCCTTACGCTGCTGTCTCGATCTTTCTTATCCTTTCCAAATGCTGGGTTATGTAAATTGACCTCTTTCATTGCTAAAAGATTTTGACCACTATGCTTTCTAACCTAAAATAAAGAAAAACACAACAACAACAAAAGGA
NEK10	3	27332692	27332888	NEK10_11	197	40	TGCAAGTGTGACATCCGGTTT	TGATTAGGAGGATGAACTGAAGCAA	TGCAAGTGTGACATCCGGTTTGGTTGGGAGTATCAGAAATGTTCCCCAAGGGGAAAGTCACCTTGTAAACACAGCCAAAAGCTCCACTTCCAAGATGATCCAAAATTGCATAGTTGCCTATATATTTCAAAGGAGCTTTGTTCTGATTAATGCTTTCAATATTTTCAGCAATTTGCTTCAGTTCATCCTCCTAATCA
NEK10	3	27332751	27332945	NEK10_12	195	35	ACCTTGTAAACACAGCCAAAAGC	GGCTGCTATGTAGTCAGGATGTAA	ACCTTGTAAACACAGCCAAAAGCTCCACTTCCAAGATGATCCAAAATTGCATAGTTGCCTATATATTTCAAAGGAGCTTTGTTCTGATTAATGCTTTCAATATTTTCAGCAATTTGCTTCAGTTCATCCTCCTAATCAAAATATAAAAAGGAAATGGGTTTCTGTGATAAATTACATCCTGACTACATAGCAGCC
NEK10	3	27332895	27333079	NEK10_13	185	37	AAAAAGGAAATGGGTTTCTGTGATAA	AGACTTTTCCCCACAGACTTGTT	AAAAAGGAAATGGGTTTCTGTGATAAATTACATCCTGACTACATAGCAGCCTGCCAAAATATTGAAAACTCAGGACTTACCACTAATAAATTCAGCTTGGATACCAATTCTTCATAAGCACTGATATCACGTACATAATGCCCTATGTCAATGAAGATCTCAAACAAGTCTGTGGGGAAAAGTCT
NEK10	3	27332956	27333137	NEK10_14	182	37	TTGAAAACTCAGGACTTACCACT	GGGAAGTAATGATCAACTGTGTCCA	TTGAAAACTCAGGACTTACCACTAATAAATTCAGCTTGGATACCAATTCTTCATAAGCACTGATATCACGTACATAATGCCCTATGTCAATGAAGATCTCAAACAAGTCTGTGGGGAAAAGTCTACAGAGAATATTACACACACTTAAAGTAGAACTTGGACACAGTTGATCATTACTTCCC
NEK10	3	27334986	27335181	NEK10_15	196	35	TCCTTCTGTTGCATCTAAGCCAA	GCTACCATTTGAGAATCACATATCCTTT	TCCTTCTGTTGCATCTAAGCCAAGTATGTGAAAACAGTTCAATCTAATGATCTCCTAAACCTAATGATCACTTATATTTCTCTAACCTCATACCTTTTAAAGAGTGGTCTGTTTCTTTCCATACTGAAGAGAAATCTCAAGGCTCTGAAAGCATAACACTAGAAAACAAAAGGATATGTGATTCTCAAATGGTAGC
NEK10	3	27336998	27337197	NEK10_16	200	30	AGGGACCAGTACTAACCTAAACAT	CCCTTTATTCTTTCAGGAAAATGGTGTAT	AGGGACCAGTACTAACCTAAACATTCTAAAAATCATAGATCATTTTACCATAGTTACCCAAGATTTCAATAACTTGATACTGAAGGACAAGAGACATGTTTATTACCTGTAATAGATTACTTTTTGCTGCATTCTTTTGCTTATTTGGTAAAATTAATTTTGCTATTGTATATACACCATTTTCCTGAAAGAATAAAGGG
NEK10	3	27337116	27337307	NEK10_17	192	30	ACTTTTTGCTGCATTCTTTTGCT	TCAAGGTCCATAGTTATACTAATATTTCTTCT	ACTTTTTGCTGCATTCTTTTGCTTATTTGGTAAAATTAATTTTGCTATTGTATATACACCATTTTCCTGAAAGAATAAAGGGGTCATACTATGAGTGACAACACTGTAGTGATACACAAGCAAAAAGAGGCAAATAAACAATCTCAAACATTAATATCAAAGAAGAAATATTAGTATAACTATGGACCTTGA
NEK10	3	27338604	27338764	NEK10_18	161	50	TGCACCACAAGGTGAGTTGATTA	TGCACACTATGCATTTGATTGTT	TGCACCACAAGGTGAGTTGATTATGAATGGTTATGGAGACCTGACCTTGAGAAGGAGTGCTCTCACCTGAACCACCTGGTGGGCATTGGTGTCATTGAGCACCAGCTCAGTGAGGGCAGCACAGCAGGCTGGAATGACAACAATCAAATGCATAGTGTGCA
NEK10	3	27343096	27343292	NEK10_19	197	36	TGCCTACTTAACACTACTACACTAATCT	GGAAGCCTGTCCAGTGCAAAT	TGCCTACTTAACACTACTACACTAATCTATGATAGTGAATAATAATACAACACAATAAATTATAGCATATCAAATAATAAAACATAAATACCTGCTTGAAGTGAGAAAGTATTTTCTTGTATTTCCCTAGGGCTCAAGTCTTCTGATAAATGAAGCTGCTGGATTCGGCCTGCAGCATTTGCACTGGACAGGCTTCC
NEK10	3	27343183	27343375	NEK10_20	193	40	ATACCTGCTTGAAGTGAGAAAGT	GGTGAAGGGAAATTGATAAATGGTCT	ATACCTGCTTGAAGTGAGAAAGTATTTTCTTGTATTTCCCTAGGGCTCAAGTCTTCTGATAAATGAAGCTGCTGGATTCGGCCTGCAGCATTTGCACTGGACAGGCTTCCAATGGAGGAGTGATCAGAAACAAAATTTCTGTCTCTGAAAAAGAAAAGTTAATGCATAGACCatttatcaatttcccttcacc
NEK10	3	27346146	27346343	NEK10_21	198	48	ATGAGGTGACACACACCAATCTG	TCTGGAGCATTGTCTGGATTCTG	ATGAGGTGACACACACCAATCTGCCATCTTGTCACAGAGTCCCCAGACTTCAACAAACAGGGCAAAGTAGGCCAAAGCCCACTTTTACTCACCCTTGTAAAATATGAAGAAGCTGTTTGATGCCTCCCCAAATGCGAATTTCCACGCTGGTCTCAGGGTCCTCACAAACCTGTACCAGAATCCAGACAATGCTCCAGA
NEK10	3	27346219	27346406	NEK10_22	188	49	AAAGCCCACTTTTACTCACCCTT	TGAAGCTCTATGAGGGGATACCG	AAAGCCCACTTTTACTCACCCTTGTAAAATATGAAGAAGCTGTTTGATGCCTCCCCAAATGCGAATTTCCACGCTGGTCTCAGGGTCCTCACAAACCTGTACCAGAATCCAGACAATGCTCCAGAGGAGCTTCAAGTGGTCAGAGTGGAGCAGACTGAGGAGGACCGGTATCCCCTCATAGAGCTTCA
NEK10	3	27346323	27346511	NEK10_23	189	54	GAATCCAGACAATGCTCCAGAGG	TCAACTCATGATGCTGTGATTCT	GAATCCAGACAATGCTCCAGAGGAGCTTCAAGTGGTCAGAGTGGAGCAGACTGAGGAGGACCGGTATCCCCTCATAGAGCTTCACCTGCTCTTTCACCTGGGGCTCTGCACAAAGTAGGCGCAGCAACTCCGCTGTTAGTCTGAAAGGGGTACAGAGGGTGGGGTGAGAATCACAGCATCATGAGTTGA
NEK10	3	27349312	27349491	NEK10_24	180	31	GGCACTGCATTGTCTTTTTCTAC	acaTGGATCTAGCAAAATATGCTTTTAGT	GGCACTGCATTGTCTTTTTCTACTGTTAGCAATCCTACCTTTTAGAAAGCAAGTCATATTCATGTAAAATCATCAACAGATTTTCTACAATGTTGAGTTCACTTATCTTCTCCCTACATTCTTGACTATAAATTGAAAAATATTAGCAATTACTAAAAGCATATTTTGCTAGATCCAtgt
NEK10	3	27350305	27350484	NEK10_25	180	36	TTATCAAGAAATTGTATTAAGTAGTTGACAAAG	TTACTTGGTGCCCGAGATACTAAT	TTATCAAGAAATTGTATTAAGTAGTTGACAAAGTAACTGATTATTTTGCATCCTTACCACCTAAATTGCTATAGTAGCAGAACTGGAAAGTATATTAGAATACACTACTTACCTTTCTGCTAAACTAGCCAGAGCCAGAAGGGAACCCAATAGAACATTAGTATCTCGGGCACCAAGTAA
NEK10	3	27350406	27350594	NEK10_26	189	32	ACACTACTTACCTTTCTGCTAAACT	TTCAAGCAGCTGGTAATGGAAAA	ACACTACTTACCTTTCTGCTAAACTAGCCAGAGCCAGAAGGGAACCCAATAGAACATTAGTATCTCGGGCACCAAGTAAATTTACTAATGTCTGAAAAATGAAGTAAAATAAAGTTTAATTATATAAGTACTACAAGCTTCTTTTTTCAACATTAACATTAATTTATTTTCCATTACCAGCTGCTTGAA
NEK10	3	27352354	27352536	NEK10_27	183	44	GACTTAACCGCAAAGGCTCTGAA	CCTCTTTGCGCTCTTTCTTTCCT	GACTTAACCGCAAAGGCTCTGAACTTCCCTAATGTGAACTATTGCCATAGGGAGCTGAAGCATTAACTCTTTCAGGGGCCACTCACCTTGTGGGCTCCACTTGTGGTGACCCATTCTCTTTGATCTTTGACTGCAGCAAGTTTTTGAAAAATATCTATAAAGGAAAGAAAGAGCGCAAAGAGG
NEK10	3	27353515	27353712	NEK10_28	198	46	TTTCCTGCTGCAAACACCATACT	CTTTTGGTGTCCTGACTGGCTT	TTTCCTGCTGCAAACACCATACTGCTTTTTCTAGCAAGTCCACAAAAATGGCTGTGTCCCTGCAATAACACTTACATGTCATGTTGACCAGCTTGTCCACAGTGTGCTGCTCTTCTCCATAGCCGAGGTACTCATTGGCTACAATCTCCATATACTGCATGAAGGACCAAACCAACAAGCCAGTCAGGACACCAAAAG
NEK10	3	27355689	27355879	NEK10_29	191	41	ACATAGGAAAGCCACCTTCTGTC	CCCCTCCACCCTCATCATTTACA	ACATAGGAAAGCCACCTTCTGTCACATACCCTTTTAATTCTTGCTCATAGCAGGCACAAAATGAAAAGGCAAGACCAGCCACCACAAAAGGAATCTTACCTGAGCTAGGTTTTCAATCCCACCCAAGCTATGGAGTATTTCCTAATAAAATAAAAGCAACAAAACACATGTAAATGATGAGGGTGGAGGGG
NEK10	3	27363604	27363803	NEK10_30	200	37	CCCACCAGTCTTTTATTACAACTTTAT	GCCACACTGGGATTTTAAACG	CCCACCAGTCTTTTATTACAACTTTATAACAAGTAAAAAAAAAAATTGTATTTTTCCAACCAACCTGATAACATGGATCCCTCATTAGTAGCCTCAGACAGATTAACACTCTCAGAAAATGAATAGATGGGGCTCGATTAACCCACTCTCTGAAAGAAGAAAACAAGAGAACATGTTCACGTTTAAAATCCCAGTGTGGC
NEK10	3	27385714	27385893	NEK10_31	180	37	GACATATGCCACTCTTCAGTAAAAGC	TACAAAATCCTTTTCTGTTTGTTTTGTC	GACATATGCCACTCTTCAGTAAAAGCCTGTTTTCCAGGAACAATCTTACCTGCTTATGAGTCTATTTTTCACCAAGGCGGTAAAGATCTCCTGAAATAGTTTACGCTGAGGATGTTTGCTGAAATTTCTCTCATTCTTGTAGTTTATACTGAGACAAAACAAACAGAAAAGGATTTTGTA
NEK10	3	27387521	27387709	NEK10_32	189	48	ACTGTGAGCTAAGCAGAATAAGT	AGCTTCCAGCCATTAACTTCGAT	ACTGTGAGCTAAGCAGAATAAGTTGCTGAAGACGAAGGAGATGCTGGATTTCTTACCTAAAATTTTCAAGTTCAACAGCTTCTGTGGATTCATGCCACTGACCCCGAGCTCTGTGTCCACCCGCCCTGATGGCGGGCTCAGACTTCGTCATGCTATTTTGGGCACTATCGAAGTTAATGGCTGGAAGCT
NEK10	3	27387556	27387755	NEK10_33	200	48	AGGAGATGCTGGATTTCTTACCT	CCGTGCTGAATTGTGATCCTCAT	AGGAGATGCTGGATTTCTTACCTAAAATTTTCAAGTTCAACAGCTTCTGTGGATTCATGCCACTGACCCCGAGCTCTGTGTCCACCCGCCCTGATGGCGGGCTCAGACTTCGTCATGCTATTTTGGGCACTATCGAAGTTAATGGCTGGAAGCTACAGAAATAGAAGCATAGAGTACATGAGGATCACAATTCAGCACGG
NEK10	3	27393885	27394071	NEK10_34	187	39	GTTAAATGGAGCCCTTTGGAAACA	ATCTTGTTCACCTGGAGCCTTCT	GTTAAATGGAGCCCTTTGGAAACATATGATTTTTCTTTTATTACCAAGTGAACATTCTTTGAAAACGCTACCTGTTGTTTGCTTGATTGGACGTTCAAAAGGCACCGAAGTCTTTTAAGATCTGAATAGTCCCTAGGAGAGAGAATAACACAATGTGAACCCACAGAAGGCTCCAGGTGAACAAGAT
NEK10	3	27394215	27394408	NEK10_35	194	38	AGTCTTCTCTATTTCTCAAAAAGCCAT	ATGCGATGTTAATTCTGGGGCAT	AGTCTTCTCTATTTCTCAAAAAGCCATTAAATCTGTTCAATGGCCACTGCCTGAGTTAACAATTAGCAAACACTCAGTAGGGAGTTACCTGATGGTGATTTCTTGCTGTTTATCAGTTGATTTTTCTGTGGTCTTCACCTTTTTATCTTGATCAGGCATTGTAAAACATCAATGCCCCAGAATTAACATCGCAT
TGFBR2	3	30648353	30648545	TGFBR2_1	193	71	TATGACGAGCAGCGGGGTC	GTCAAGCGCAGCGGAGAG	TATGACGAGCAGCGGGGTCTGCCATGGGTCGGGGGCTGCTCAGGGGCCTGTGGCCGCTGCACATCGTCCTGTGGACGCGTATCGCCAGCACGATCCCACCGCACGTTCAGAAGTCGGGTGAGTGGTCCCCAGCCCGGGCTCGGCGGGGCGCCGGGGGTCTTCCTGGGGTCCCCGCCTCTCCGCTGCGCTTGAC
TGFBR2	3	30664648	30664832	TGFBR2_2	185	37	AAAAACAGCTCTCTGAGATGGATA	ATTAAGCAGTGAGGGAGCATGAC	aaaaacagctctctgagatggatataattatcctgttttacagatgtggaaatggaggcccagaaagatgaaatcatctgccccagCTGTAATAGGACTGCCCATCCACTGAGACATAGTAAAGTATCATTAATTAATCTTTTCATCATTTTTCTATTTTTAGTCATGCTCCCTCACTGCTTAAT
TGFBR2	3	30686165	30686350	TGFBR2_3	186	40	AACATCTTCAGGAATTCATTGGC	CTCATGCAGGATTTCTGGTTGTC	AACATCTTCAGGAATTCATTGGCAGGCTGCCTGGCAGTTGGATAATCATTTAATATATCTTTCTCTCTCCTCAGTTAATAACGACATGATAGTCACTGACAACAACGGTGCAGTCAAGTTTCCACAACTGTGTAAATTTTGTGATGTGAGATTTTCCACCTGTGACAACCAGAAATCCTGCATGAG
TGFBR2	3	30686272	30686460	TGFBR2_4	189	42	GTGCAGTCAAGTTTCCACAACTG	ACATTATGTAAAAAGGGGAAAAGAAAGA	GTGCAGTCAAGTTTCCACAACTGTGTAAATTTTGTGATGTGAGATTTTCCACCTGTGACAACCAGAAATCCTGCATGAGCAACTGCAGCATCACCTCCATCTGTGAGAAGCCACAGGAAGTCTGTGTGGCTGTATGGTAAGCAAGCCTTTTAAGAAGTTATTCTTTCTTTTCCCCTTTTTACATAATGT
TGFBR2	3	30691709	30691906	TGFBR2_5	198	44	TCTCTTTCTCTCTCTCCCTCTCC	ACACATGAAGAAAGTCTCACCAG	TCTCTTTCTCTCTCTCCCTCTCCCCTCGCTTCCAATGAATCTCTTCACTCTAGGAGAAAGAATGACGAGAACATAACACTAGAGACAGTTTGCCATGACCCCAAGCTCCCCTACCATGACTTTATTCTGGAAGATGCTGCTTCTCCAAAGTGCATTATGAAGGAAAAAAAAAAGCCTGGTGAGACTTTCTTCATGTGT
TGFBR2	3	30691784	30691983	TGFBR2_6	200	44	ACACTAGAGACAGTTTGCCATGA	GGTCCCACACCCTTAAGAGAAGA	ACACTAGAGACAGTTTGCCATGACCCCAAGCTCCCCTACCATGACTTTATTCTGGAAGATGCTGCTTCTCCAAAGTGCATTATGAAGGAAAAAAAAAAGCCTGGTGAGACTTTCTTCATGTGTTCCTGTAGCTCTGATGAGTGCAATGACAACATCATCTTCTCAGAAGGTGAGTTTTCTTCTCTTAAGGGTGTGGGACC
TGFBR2	3	30713063	30713251	TGFBR2_7	189	47	CCCACTTCCTGACAGTACTTACC	GTTAACGCGGTAGCAGTAGAAGA	CCCACTTCCTGACAGTACTTACCTACCACATCCAACTCCTTCTCTCCTTGTTTTGTTTCCCCATCAGAATATAACACCAGCAATCCTGACTTGTTGCTAGTCATATTTCAAGTGACAGGCATCAGCCTCCTGCCACCACTGGGAGTTGCCATATCTGTCATCATCATCTTCTACTGCTACCGCGTTAAC
TGFBR2	3	30713161	30713358	TGFBR2_8	198	53	AGTCATATTTCAAGTGACAGGCATCA	CTGATGTCAGAGCGGTCATCTTC	AGTCATATTTCAAGTGACAGGCATCAGCCTCCTGCCACCACTGGGAGTTGCCATATCTGTCATCATCATCTTCTACTGCTACCGCGTTAACCGGCAGCAGAAGCTGAGTTCAACCTGGGAAACCGGCAAGACGCGGAAGCTCATGGAGTTCAGCGAGCACTGTGCCATCATCCTGGAAGATGACCGCTCTGACATCAG
TGFBR2	3	30713271	30713453	TGFBR2_9	183	56	CAACCTGGGAAACCGGCAA	TATAGACCTCAGCAAAGCGACCT	CAACCTGGGAAACCGGCAAGACGCGGAAGCTCATGGAGTTCAGCGAGCACTGTGCCATCATCCTGGAAGATGACCGCTCTGACATCAGCTCCACGTGTGCCAACAACATCAACCACAACACAGAGCTGCTGCCCATTGAGCTGGACACCCTGGTGGGGAAAGGTCGCTTTGCTGAGGTCTATA
TGFBR2	3	30713370	30713551	TGFBR2_10	182	51	CCAACAACATCAACCACAACACA	GTCCTTCTCTGTCTTCCAAGAGG	CCAACAACATCAACCACAACACAGAGCTGCTGCCCATTGAGCTGGACACCCTGGTGGGGAAAGGTCGCTTTGCTGAGGTCTATAAGGCCAAGCTGAAGCAGAACACTTCAGAGCAGTTTGAGACAGTGGCAGTCAAGATCTTTCCCTATGAGGAGTATGCCTCTTGGAAGACAGAGAAGGAC
TGFBR2	3	30713460	30713652	TGFBR2_11	193	49	AGCTGAAGCAGAACACTTCAGAG	GCGGTGATCAGCCAGTATTGTTT	AGCTGAAGCAGAACACTTCAGAGCAGTTTGAGACAGTGGCAGTCAAGATCTTTCCCTATGAGGAGTATGCCTCTTGGAAGACAGAGAAGGACATCTTCTCAGACATCAATCTGAAGCATGAGAACATACTCCAGTTCCTGACGGCTGAGGAGCGGAAGACGGAGTTGGGGAAACAATACTGGCTGATCACCGC
TGFBR2	3	30713574	30713768	TGFBR2_12	195	60	AGCATGAGAACATACTCCAGTTCC	GATCACTGTGGAGGTGAGCAATC	AGCATGAGAACATACTCCAGTTCCTGACGGCTGAGGAGCGGAAGACGGAGTTGGGGAAACAATACTGGCTGATCACCGCCTTCCACGCCAAGGGCAACCTACAGGAGTACCTGACGCGGCATGTCATCAGCTGGGAGGACCTGCGCAAGCTGGGCAGCTCCCTCGCCCGGGGGATTGCTCACCTCCACAGTGATC
TGFBR2	3	30713686	30713881	TGFBR2_13	196	60	GACGCGGCATGTCATCA	CAGGGAAAGCCCAAAGTCACA	GACGCGGCATGTCATCAGCTGGGAGGACCTGCGCAAGCTGGGCAGCTCCCTCGCCCGGGGGATTGCTCACCTCCACAGTGATCACACTCCATGTGGGAGGCCCAAGATGCCCATCGTGCACAGGGACCTCAAGAGCTCCAATATCCTCGTGAAGAACGACCTAACCTGCTGCCTGTGTGACTTTGGGCTTTCCCTG
TGFBR2	3	30713777	30713967	TGFBR2_14	191	54	TGTGGGAGGCCCAAGAT	CTCAAGGTAAAGGGGATCTAGCA	TGTGGGAGGCCCAAGATGCCCATCGTGCACAGGGACCTCAAGAGCTCCAATATCCTCGTGAAGAACGACCTAACCTGCTGCCTGTGTGACTTTGGGCTTTCCCTGCGTCTGGACCCTACTCTGTCTGTGGATGACCTGGCTAACAGTGGGCAGGTAAGTTAGAGCTAGTGCTAGATCCCCTTTACCTTGAG
TGFBR2	3	30715571	30715770	TGFBR2_15	200	49	GGCCTCACTGTCTGTTTTTGCTA	ACCACTACACAATGATGCTGGTC	GGCCTCACTGTCTGTTTTTGCTATAGGTGGGAACTGCAAGATACATGGCTCCAGAAGTCCTAGAATCCAGGATGAATTTGGAGAATGTTGAGTCCTTCAAGCAGACCGATGTCTACTCCATGGCTCTGGTGCTCTGGGAAATGACATCTCGCTGTAATGCAGTGGGAGGTAGGTGTGGACCAGCATCATTGTGTAGTGGT
TGFBR2	3	30729851	30730050	TGFBR2_16	200	49	CTGTGTTTGCTGGCTTTCTTCAC	GCAACTTGGTTGAATCTTACTGACC	CTGTGTTTGCTGGCTTTCTTCACAGAAGTAAAAGATTATGAGCCTCCATTTGGTTCCAAGGTGCGGGAGCACCCCTGTGTCGAAAGCATGAAGGACAACGTGTTGAGAGATCGAGGGCGACCAGAAATTCCCAGCTTCTGGCTCAACCACCAGGTAAGGAGTGAGTGTTTACAAAGGTCAGTAAGATTCAACCAAGTTGC
TGFBR2	3	30732888	30733072	TGFBR2_17	185	59	CTTTGGATCTCTTTCCCGCTACA	GAGCCGTCTTCAGGAATCTTCTC	CTTTGGATCTCTTTCCCGCTACAGGGCATCCAGATGGTGTGTGAGACGTTGACTGAGTGCTGGGACCACGACCCAGAGGCCCGTCTCACAGCCCAGTGTGTGGCAGAACGCTTCAGTGAGCTGGAGCATCTGGACAGGCTCTCGGGGAGGAGCTGCTCGGAGGAGAAGATTCCTGAAGACGGCTC
TGFBR2	3	30733007	30733190	TGFBR2_18	184	58	GCTGGAGCATCTGGACAGG	TTTCCAGGAAGCATCAGTTCAGG	GCTGGAGCATCTGGACAGGCTCTCGGGGAGGAGCTGCTCGGAGGAGAAGATTCCTGAAGACGGCTCCCTAAACACTACCAAATAGCTCTTCTGGGGCAGGCTGGGCCATGTCCAAAGAGGCTGCCCCTCTCACCAAAGAACAGAGGCAGCAGGAAGCTGCCCCTGAACTGATGCTTCCTGGAAA
PTH1R	3	46924975	46925161	PTH1R_1	187	76	CAGCTCTGCACCCCCTAC	GCAGCCTGTCCCGGAGT	CAGCTCTGCACCCCCTACCACCACCAGGGCCGGCGGCGGCGGCTGCCCCGAGGGACGCGGCCCTAGGCGGTGGCGATGGGGACCGCCCGGATCGCACCCGGCCTGGCGCTCCTGCTCTGCTGCCCCGTGCTCAGCTCCGCGTACGCGCTGGTGAGTCCCCCGCCGCCAACACTCCGGGACAGGCTGC
PTH1R	3	46935332	46935525	PTH1R_2	194	59	GATGTCTCTGGGACCTGCTG	CCAGACCCTCTTCCTTTGACC	GATGTCTCTGGGACCTGCTGCTGCGCCGGAAAGTCCTGCCTGTGGTCTGACCTTCGGCTTGGCAGGTGGATGCAGATGACGTCATGACTAAAGAGGAACAGATCTTCCTGCTGCACCGTGCTCAGGCCCAGTGCGAAAAACGGCTCAAGGAGGTCCTGCAGAGGCCAGGTGGGGGTCAAAGGAAGAGGGTCTGG
PTH1R	3	46937163	46937344	PTH1R_3	182	54	gTACCCTGGGTCTCCTGTTGTA	CAGTGGGTGCCTCCTTGTC	gTACCCTGGGTCTCCTGTTGTAGCACAGCTGACAGCCATCATTACCACCCTGGTTTCTCCAGCCAGCATAATGGAATCAGACAAGGGATGGACATCTGCGTCCACATCAGGGAAGCCCAGGAAAGATAAGGCATCTGGGAAGCTCTACCCTGAGTCTGAGGAGGACAAGGAGGCACCCACTG
PTH1R	3	46937238	46937436	PTH1R_4	199	57	ATCAGACAAGGGATGGACATCTG	CACATCAGAGGGACAGTGCAA	ATCAGACAAGGGATGGACATCTGCGTCCACATCAGGGAAGCCCAGGAAAGATAAGGCATCTGGGAAGCTCTACCCTGAGTCTGAGGAGGACAAGGAGGCACCCACTGGCAGCAGGTACCGAGGTACGTCTCTGCTTCCATGCATCCAGCTGGCATGGGCTTGGATCCACCCACCCCCATTGCACTGTCCCTCTGATGTG
PTH1R	3	46939308	46939503	PTH1R_5	196	61	CCTTGGTATCCCCTACCCTGT	CCAAGTCTCAGCCTCCTTGTAAT	CCTTGGTATCCCCTACCCTGTCTGTCTCTGGGCACAGGGCGCCCCTGTCTGCCGGAATGGGACCACATCCTGTGCTGGCCGCTGGGGGCACCAGGTGAGGTGGTGGCTGTGCCCTGTCCGGACTACATTTATGACTTCAATCACAAAGGTGAGGCCTGCTGGAAGGGGTGGGGATTACAAGGAGGCTGAGACTTGG
PTH1R	3	46939541	46939734	PTH1R_6	194	59	CCTGACCTCCCATGGACCT	GGGGTGGGAGTGAATTTATCCTG	CCTGACCTCCCATGGACCTGCAGGCCATGCCTACCGACGCTGTGACCGCAATGGCAGCTGGGAGCTGGTGCCTGGGCACAACAGGACGTGGGCCAACTACAGCGAGTGTGTCAAATTTCTCACCAATGAGACTCGTGAACGGGTGCGAGCCTTTCTCCTCCCCAACCTGACCAGGATAAATTCACTCCCACCCC
PTH1R	3	46939800	46939995	PTH1R_7	196	65	CTTGCTCTTACCCTGATGCTCTC	ATGTCCCGCCGCCTCT	CTTGCTCTTACCCTGATGCTCTCCCTGGGTCCCAGGGCTCTGACTGTGTCTCCCCCCGCCCCGCACAGGAGGTGTTTGACCGCCTGGGCATGATTTACACCGTGGGCTACTCCGTGTCCCTGGCGTCCCTCACCGTAGCTGTGCTCATCCTGGCCTACTTTAGGTgggcggggcggggcgagaggcggcgggacat
PTH1R	3	46940081	46940279	PTH1R_8	199	66	CAACCCAGCTTCCTGTCCAC	GGCGCTCAGCCTCATCAA	CAACCCAGCTTCCTGTCCACCCACCGCGCGTCCCCGTGCCCCCACCCACGGTCATGTCGCGCGCCCCGCAGGCGGCTGCACTGCACGCGCAACTACATCCACATGCACCTGTTCCTGTCCTTCATGCTGCGCGCCGTGAGCATCTTCGTCAAGGACGCTGTGCTCTACTCTGGCGCCACGCTTGATGAGGCTGAGCGCC
PTH1R	3	46940185	46940368	PTH1R_9	184	70	GCACCTGTTCCTGTCCTTCAT	GGCGGGCAGAGGGGTA	GCACCTGTTCCTGTCCTTCATGCTGCGCGCCGTGAGCATCTTCGTCAAGGACGCTGTGCTCTACTCTGGCGCCACGCTTGATGAGGCTGAGCGCCTCACCGAGGAGGAGCTGCGCGCCATCGCCCAGGCGCCCCCGCCGCCTGCCACCGCCGCTGCCGGCTACGTGAGTACCCCTCTGCCCGCC
PTH1R	3	46940729	46940927	PTH1R_10	199	59	CAGCCCAGCCCTGACTTC	GCCCCACAGGTACTTCTTCTCT	CAGCCCAGCCCTGACTTCCCGGAGGCAGGCCCTGCCCTCTGACTAACACCAGCTGGTCTCTTAGGCGGGCTGCAGGGTGGCTGTGACCTTCTTCCTTTACTTCCTGGCCACCAACTACTACTGGATTCTGGTGGAGGGGCTGTACCTGCACAGCCTCATCTTCATGGCCTTCTTCTCAGAGAAGAAGTACCTGTGGGGC
PTH1R	3	46940806	46941000	PTH1R_11	195	59	TGGCTGTGACCTTCTTCCTTTAC	GTCACCCACGGTCCCAC	TGGCTGTGACCTTCTTCCTTTACTTCCTGGCCACCAACTACTACTGGATTCTGGTGGAGGGGCTGTACCTGCACAGCCTCATCTTCATGGCCTTCTTCTCAGAGAAGAAGTACCTGTGGGGCTTCACAGTCTTCGGCTGGGGTACGCGGGCACAGCGGGTAGCGAGGTGCCGGCAGGGGTGGGACCGTGGGTGAC
PTH1R	3	46942456	46942638	PTH1R_12	183	62	GGAATGACCTTGTGGACAGCA	TTCCTGGAAGAAAAGGGACCCAG	GGAATGACCTTGTGGACAGCAGCCACAGTCCTGCACACTGTCCCCCTCTGTGCCCACAGGTCTGCCCGCTGTCTTCGTGGCTGTGTGGGTCAGTGTCAGAGCTACCCTGGCCAACACCGGGTAGGTCCAGGTGGAGAAGGGGCCCAGGCAAGAAGCACCCCTGGGTCCCTTTTCTTCCAGGAA
PTH1R	3	46942851	46943046	PTH1R_13	196	62	AGTCTTAGGATGGGAACAGGAGG	CTGTCAGGGGCTGGTTCC	AGTCTTAGGATGGGAACAGGAGGGATGGGAGCTAATGCCTCAACCTCCCCCAGGTGCTGGGACTTGAGCTCCGGGAACAAAAAGTGGATCATCCAGGTGCCCATCCTGGCCTCCATTGTGGTGAGCAGGGGTGGGCTGCTGGCCACAGGGGTGGGTGGGATGTGCGCCTGCGTCCCCTGGAACCAGCCCCTGACAG
PTH1R	3	46943232	46943431	PTH1R_14	200	63	GACGCAGCCCCCTCAC	CCACTGTCTTTCCTGGGGTACAT	GACGCAGCCCCCTCACTCCCACAGCTCAACTTCATCCTCTTCATCAATATCGTCCGGGTGCTCGCCACCAAGCTGCGGGAGACCAACGCCGGCCGGTGTGACACACGGCAGCAGTACCGGTGAGCCCACCATGCCTGCCATGCCCTGGCTCCTCAGGGGTCCCTGAGTCCTGGTACCATGTACCCCAGGAAAGACAGTGG
PTH1R	3	46943959	46944143	PTH1R_15	185	57	CAATGCTTGTTGAAGGGGAAGTG	AGAGCATCTCATAGTGCATCTGG	CAATGCTTGTTGAAGGGGAAGTGGCTTGGCCCTGACCTACCTGCCCCGCTGGCCCAGGAAGCTGCTCAAATCCACGCTGGTGCTCATGCCCCTCTTTGGCGTCCACTACATTGTCTTCATGGCCACACCATACACCGAGGTCTCAGGGACGCTCTGGCAAGTCCAGATGCACTATGAGATGCTCT
PTH1R	3	46944011	46944201	PTH1R_16	191	60	CCCAGGAAGCTGCTCAAATCC	GAACCCCTCCCACCCTCA	CCCAGGAAGCTGCTCAAATCCACGCTGGTGCTCATGCCCCTCTTTGGCGTCCACTACATTGTCTTCATGGCCACACCATACACCGAGGTCTCAGGGACGCTCTGGCAAGTCCAGATGCACTATGAGATGCTCTTCAACTCCTTCCAGGTGCGCAGTGCTGGCCCGGGCCTGGCTGAGGGTGGGAGGGGTTC
PTH1R	3	46944114	46944308	PTH1R_17	195	57	GGCAAGTCCAGATGCACTATGAG	CCCTATGCCAACACTGTCTCC	GGCAAGTCCAGATGCACTATGAGATGCTCTTCAACTCCTTCCAGGTGCGCAGTGCTGGCCCGGGCCTGGCTGAGGGTGGGAGGGGTTCCGGGGGCAGGCCTGATTCGAGACACCCCTCTTCACAGGGATTTTTTGTCGCAATCATATACTGTTTCTGCAATGGCGAGGTAAGCAGGAGACAGTGTTGGCATAGGG
PTH1R	3	46944708	46944891	PTH1R_18	184	59	CATCGCTGGGGTTGGGAG	GCCGACATTGGTCACACTTG	CATCGCTGGGGTTGGGAGACACACCTGACTGCCGCACCCTTACTGCCCCAAGGTACAAGCTGAGATCAAGAAATCTTGGAGCCGCTGGACACTGGCACTGGACTTCAAGCGAAAGGCACGCAGCGGGAGCAGCAGCTATAGCTACGGCCCCATGGTGTCCCACACAAGTGTGACCAATGTCGGC
PTH1R	3	46944754	46944942	PTH1R_19	189	62	CCCAAGGTACAAGCTGAGATCAA	GGCAGTGGGCAGTAGGC	CCCAAGGTACAAGCTGAGATCAAGAAATCTTGGAGCCGCTGGACACTGGCACTGGACTTCAAGCGAAAGGCACGCAGCGGGAGCAGCAGCTATAGCTACGGCCCCATGGTGTCCCACACAAGTGTGACCAATGTCGGCCCCCGTGTGGGACTCGGCCTGCCCCTCAGCCCCCGCCTACTGCCCACTGCC
PTH1R	3	46944883	46945070	PTH1R_20	188	69	AATGTCGGCCCCCGTGT	GAGCAGGAGCCGTTGAGG	AATGTCGGCCCCCGTGTGGGACTCGGCCTGCCCCTCAGCCCCCGCCTACTGCCCACTGCCACCACCAACGGCCACCCTCAGCTGCCTGGCCATGCCAAGCCAGGGACCCCAGCCCTGGAGACCCTCGAGACCACACCACCTGCCATGGCTGCTCCCAAGGACGATGGGTTCCTCAACGGCTCCTGCTC
PTH1R	3	46945002	46945201	PTH1R_21	200	63	GACCCTCGAGACCACACCA	CTTTTGGTCCATCTGTCCATCCA	GACCCTCGAGACCACACCACCTGCCATGGCTGCTCCCAAGGACGATGGGTTCCTCAACGGCTCCTGCTCAGGCCTGGACGAGGAGGCCTCTGGGCCTGAGCGGCCACCTGCCCTGCTACAGGAAGAGTGGGAGACAGTCATGTGACCAGGCGCTGGGGGCTGGACCTGCTGACATAGTGGATGGACAGATGGACCAAAAG
EGOT	3	4790792	4790991	EGOT_1	200	37	TGGTAGACAAGGGTTAGTATTAGGT	ATGAAGGCAGGGAATTGGGTATC	TGGTAGACAAGGGTTAGTATTAGGTAACCTTGAATACTAATTCGTGATTCTTTATCTTCTCAAAGTAAAAACAAAAGAACAAACTTTTGTTCTGGTCATTTTATGAGTCATCTGAGCACTTGCAGAACCATAATGGCAAATAGCTAATACATGGCACCTTTTCAGTTGCTCACATTGGATACCCAATTCCCTGCCTTCAT
EGOT	3	4790902	4791088	EGOT_2	187	45	TCTGAGCACTTGCAGAACCATAA	GGTCACCTCAGCAAGAGATGC	TCTGAGCACTTGCAGAACCATAATGGCAAATAGCTAATACATGGCACCTTTTCAGTTGCTCACATTGGATACCCAATTCCCTGCCTTCATTTATGCATTATTGTGGTTTTGACCACCTACTGGTTCTGATGAGAGAGGAAATCCCGTAGTAGGAGTGATAGCCAGAGCATCTCTTGCTGAGGTGACC
EGOT	3	4791006	4791195	EGOT_3	190	42	GGTTTTGACCACCTACTGGTTCT	TATATGGAGGCCCCACTTAAGCA	GGTTTTGACCACCTACTGGTTCTGATGAGAGAGGAAATCCCGTAGTAGGAGTGATAGCCAGAGCATCTCTTGCTGAGGTGACCCCCTGAGCTGATTATAGCCCTATGGGGTATTTTGTTTTGCTGATACATAATACATTGAAAACACTGTATATAGAATTTTTTGAATGCTTAAGTGGGGCCTCCATATA
EGOT	3	4791064	4791259	EGOT_4	196	42	CAGAGCATCTCTTGCTGAGGTGA	ATGTCTTCGGGGTTAAGTGTCAG	CAGAGCATCTCTTGCTGAGGTGACCCCCTGAGCTGATTATAGCCCTATGGGGTATTTTGTTTTGCTGATACATAATACATTGAAAACACTGTATATAGAATTTTTTGAATGCTTAAGTGGGGCCTCCATATACACTGAGATCATTTTATCCCCCTACCTTCCACTGCACTTCACTGACACTTAACCCCGAAGACAT
EGOT	3	4791177	4791361	EGOT_5	185	43	TAAGTGGGGCCTCCATATACACT	GAATTCAATGCCCTTGGTGTCAA	TAAGTGGGGCCTCCATATACACTGAGATCATTTTATCCCCCTACCTTCCACTGCACTTCACTGACACTTAACCCCGAAGACATTTGCATTGGAAACTTCGCATTATCTGTTTGAAAGTCCTCTCAGTTCAAGCCACACATTCTAAGACTCAGCAAAAGCTTATTGACACCAAGGGCATTGAATTC
EGOT	3	4791274	4791462	EGOT_6	189	40	TCGCATTATCTGTTTGAAAGTCCTCT	TTCCTGTCTAACCTGTTGATGCT	TCGCATTATCTGTTTGAAAGTCCTCTCAGTTCAAGCCACACATTCTAAGACTCAGCAAAAGCTTATTGACACCAAGGGCATTGAATTCACCAGCACCTGTAACGTTTCTTGAAGAATGCTTGCTAGGGAAAAGTTCCCATGGTAACTGTTTTTAAAAGAGTTTTGTAGCATCAACAGGTTAGACAGGAA
EGOT	3	4791363	4791545	EGOT_7	183	44	CCAGCACCTGTAACGTTTCTTGA	AGGGTGCTTCAGTGTCTTTGTTA	CCAGCACCTGTAACGTTTCTTGAAGAATGCTTGCTAGGGAAAAGTTCCCATGGTAACTGTTTTTAAAAGAGTTTTGTAGCATCAACAGGTTAGACAGGAAGTCAAAATCATGGAGCTCAGCAGCATCCCCTATAAGCACGTGCTCCTTTTTAACCACCCCTAACAAAGACACTGAAGCACCCT
EGOT	3	4791440	4791630	EGOT_8	191	51	AGCATCAACAGGTTAGACAGGAA	CACTGCACAGGGAAACACAAATC	AGCATCAACAGGTTAGACAGGAAGTCAAAATCATGGAGCTCAGCAGCATCCCCTATAAGCACGTGCTCCTTTTTAACCACCCCTAACAAAGACACTGAAGCACCCTGTTCATAAGCCCTGATGGGCACTGGAGGGTCTGGCCAGGTTGGGCTGGATTTCAGGGGACCTGATTTGTGTTTCCCTGTGCAGTG
EGOT	3	4791547	4791730	EGOT_9	184	52	TTCATAAGCCCTGATGGGCACT	CCAGGCCTAAGCAGTTGTCTTT	TTCATAAGCCCTGATGGGCACTGGAGGGTCTGGCCAGGTTGGGCTGGATTTCAGGGGACCTGATTTGTGTTTCCCTGTGCAGTGCTCGTTTCCATCACCATCTTTAAGGAGGAGGCCTTTTCCATCCACTGGACTCTTACCATCGTGCCTGTTAAGGAACAAAAAGACAACTGCTTAGGCCTGG
EGOT	3	4792552	4792749	EGOT_10	198	41	CCGGGACATCAGAAGTTGTTTTC	TCCAACTAGCAACAGACTTCACC	CCGGGACATCAGAAGTTGTTTTCTAAGGTGTGTTTTTTCCACCCTCCCTTATTTCTTTTCCCATGATTTTTTTATTACCAATCCCTCCATGAGAGAGACCTATCCTAGGAGTCTTCCATCTTGCCTGATAGAAGTTTTCTCTGGCATATTCCAAATTCAGATTGCTCCAAAACCAGGTGAAGTCTGTTGCTAGTTGGA
EGOT	3	4792657	4792841	EGOT_11	185	48	TAGGAGTCTTCCATCTTGCCTGA	GACAGAGACGTCATTGCTTCACC	TAGGAGTCTTCCATCTTGCCTGATAGAAGTTTTCTCTGGCATATTCCAAATTCAGATTGCTCCAAAACCAGGTGAAGTCTGTTGCTAGTTGGACAGTCGGTATGGCCTGGAGGAGAAGGGCTGTTTGTATTTCCATGCATCCTCCTTTGTCCTCTTGCCCTGGGTGAAGCAATGACGTCTCTGTC
EGOT	3	4792729	4792928	EGOT_12	200	47	TGAAGTCTGTTGCTAGTTGGACA	GAGTTACCCAAGCTCCAGGAAT	TGAAGTCTGTTGCTAGTTGGACAGTCGGTATGGCCTGGAGGAGAAGGGCTGTTTGTATTTCCATGCATCCTCCTTTGTCCTCTTGCCCTGGGTGAAGCAATGACGTCTCTGTCTCCTCTAGTGCGTTATAAAATAGAACCGCAAGAAAACAAGAGAATGGGTTTACCCCACAATCATAATTCCTGGAGCTTGGGTAACTC
EGOT	3	4792834	4793033	EGOT_13	200	43	TCTCTGTCTCCTCTAGTGCGTTA	AGCAAGGTGCATTCGTCGT	TCTCTGTCTCCTCTAGTGCGTTATAAAATAGAACCGCAAGAAAACAAGAGAATGGGTTTACCCCACAATCATAATTCCTGGAGCTTGGGTAACTCCTGTTACCTGAAGGTTGCAGGTTGAAATGACTCAGCTTGCATTTAATTAAAAAAAAAAATGCTGCCCCATCAGATTCTCAGCAGGGACGACGAATGCACCTTGCT
EGOT	3	4792942	4793141	EGOT_14	200	54	GTTGCAGGTTGAAATGACTCAGC	CTGGTGGGAATGTGATGGACAA	GTTGCAGGTTGAAATGACTCAGCTTGCATTTAATTAAAAAAAAAAATGCTGCCCCATCAGATTCTCAGCAGGGACGACGAATGCACCTTGCTGAGAACCCTATGGCTGCCCAGGGAGTGGCCCCCTGCACCCTGGCCGGCCTGGTGGTGGCCACAGAGGCTTCTGAGATGGCTCTGTGTTGTCCATCACATTCCCACCAG
EGOT	3	4793027	4793224	EGOT_15	198	54	CCTTGCTGAGAACCCTATGGC	GCCTGTCCTCATGGAACTACATA	CCTTGCTGAGAACCCTATGGCTGCCCAGGGAGTGGCCCCCTGCACCCTGGCCGGCCTGGTGGTGGCCACAGAGGCTTCTGAGATGGCTCTGTGTTGTCCATCACATTCCCACCAGAGCAGAGACACTTAGAAGATGTGAGTAGGGAGGTTAGGATGAAAAGTTCTTAGAAAAGAATATGTAGTTCCATGAGGACAGGC
EGOT	3	4793106	4793299	EGOT_16	194	43	GAGATGGCTCTGTGTTGTCCATC	CAGGCTACTGCTATTAAGGATTGC	GAGATGGCTCTGTGTTGTCCATCACATTCCCACCAGAGCAGAGACACTTAGAAGATGTGAGTAGGGAGGTTAGGATGAAAAGTTCTTAGAAAAGAATATGTAGTTCCATGAGGACAGGCTGAAAAAATTTTTAAAAAGCCAAACCCACCTCTGCCTTGCCCAGAAGTTGTGCAATCCTTAATAGCAGTAGCCTG
TET2	4	106155022	106155221	TET2_1	200	48	CACATTTTAATTTTTGTTTCCATGCTCT	GGCAGTGGGCTTCCATTCT	CACATTTTAATTTTTGTTTCCATGCTCTTTAGAATTCAACTAGAGGGCAGCCTTGTGGATGGCCCCGAAGCAAGCCTGATGGAACAGGATAGAACCAACCATGTTGAGGGCAACAGACTAAGTCCATTCCTGATACCATCACCTCCCATTTGCCAGACAGAACCTCTGGCTACAAAGCTCCAGAATGGAAGCCCACTGCC
TET2	4	106155145	106155324	TET2_2	180	47	CCATTCCTGATACCATCACCTCC	ACTCACACGACTATTCTGGCTTC	CCATTCCTGATACCATCACCTCCCATTTGCCAGACAGAACCTCTGGCTACAAAGCTCCAGAATGGAAGCCCACTGCCTGAGAGAGCTCATCCAGAAGTAAATGGAGACACCAAGTGGCACTCTTTCAAAAGTTATTATGGAATACCCTGTATGAAGGGAAGCCAGAATAGTCGTGTGAGT
TET2	4	106155229	106155428	TET2_3	200	43	GCTCATCCAGAAGTAAATGGAGACA	TTGATCTGAAGGAGCCCAGAGAG	GCTCATCCAGAAGTAAATGGAGACACCAAGTGGCACTCTTTCAAAAGTTATTATGGAATACCCTGTATGAAGGGAAGCCAGAATAGTCGTGTGAGTCCTGACTTTACACAAGAAAGTAGAGGGTATTCCAAGTGTTTGCAAAATGGAGGAATAAAACGCACAGTTAGTGAACCTTCTCTCTCTGGGCTCCTTCAGATCAA
TET2	4	106155344	106155524	TET2_4	181	43	GTAGAGGGTATTCCAAGTGTTTGC	GAGACATTTGGTTGACTGCTTTC	GTAGAGGGTATTCCAAGTGTTTGCAAAATGGAGGAATAAAACGCACAGTTAGTGAACCTTCTCTCTCTGGGCTCCTTCAGATCAAGAAATTGAAACAAGACCAAAAGGCTAATGGAGAAAGACGTAACTTCGGGGTAAGCCAAGAAAGAAATCCAGGTGAAAGCAGTCAACCAAATGTCTC
TET2	4	106155444	106155633	TET2_5	190	42	CCAAAAGGCTAATGGAGAAAGACG	CTCTGGATTTTCAGGCCCACT	CCAAAAGGCTAATGGAGAAAGACGTAACTTCGGGGTAAGCCAAGAAAGAAATCCAGGTGAAAGCAGTCAACCAAATGTCTCCGATTTGAGTGATAAGAAAGAATCTGTGAGTTCTGTAGCCCAAGAAAATGCAGTTAAAGATTTCACCAGTTTTTCAACACATAACTGCAGTGGGCCTGAAAATCCAGAG
TET2	4	106155481	106155667	TET2_6	187	42	AGCCAAGAAAGAAATCCAGGTGA	CACTTTTCCCCTCCTGCTCATT	AGCCAAGAAAGAAATCCAGGTGAAAGCAGTCAACCAAATGTCTCCGATTTGAGTGATAAGAAAGAATCTGTGAGTTCTGTAGCCCAAGAAAATGCAGTTAAAGATTTCACCAGTTTTTCAACACATAACTGCAGTGGGCCTGAAAATCCAGAGCTTCAGATTCTGAATGAGCAGGAGGGGAAAAGTG
TET2	4	106155612	106155810	TET2_7	199	42	CAGTGGGCCTGAAAATCCAGAG	ACAATCTGGATAATATTGAGACAGTGTTTTT	CAGTGGGCCTGAAAATCCAGAGCTTCAGATTCTGAATGAGCAGGAGGGGAAAAGTGCTAATTACCATGACAAGAACATTGTATTACTTAAAAACAAGGCAGTGCTAATGCCTAATGGTGCTACAGTTTCTGCCTCTTCCGTGGAACACACACATGGTGAACTCCTGGAAAAAACACTGTCTCAATATTATCCAGATTGT
TET2	4	106155713	106155898	TET2_8	186	44	TGCTAATGCCTAATGGTGCTACA	GGTGAGTGATCTCACAGGACAAC	TGCTAATGCCTAATGGTGCTACAGTTTCTGCCTCTTCCGTGGAACACACACATGGTGAACTCCTGGAAAAAACACTGTCTCAATATTATCCAGATTGTGTTTCCATTGCGGTGCAGAAAACCACATCTCACATAAATGCCATTAACAGTCAGGCTACTAATGAGTTGTCCTGTGAGATCACTCACC
TET2	4	106155846	106156039	TET2_9	194	48	AAATGCCATTAACAGTCAGGCTA	AGGTATTTAGCATTGCAGCTAGTTT	AAATGCCATTAACAGTCAGGCTACTAATGAGTTGTCCTGTGAGATCACTCACCCATCGCATACCTCAGGGCAGATCAATTCCGCACAGACCTCTAACTCTGAGCTGCCTCCAAAGCCAGCTGCAGTGGTGAGTGAGGCCTGTGATGCTGATGATGCTGATAATGCCAGTAAACTAGCTGCAATGCTAAATACCT
TET2	4	106155989	106156184	TET2_10	196	41	ATGCTGATGATGCTGATAATGCC	GCTTGCAAATTGCTGCTGGA	ATGCTGATGATGCTGATAATGCCAGTAAACTAGCTGCAATGCTAAATACCTGTTCCTTTCAGAAACCAGAACAACTACAACAACAAAAATCAGTTTTTGAGATATGCCCATCTCCTGCAGAAAATAACATCCAGGGAACCACAAAGCTAGCGTCTGGTGAAGAATTCTGTTCAGGTTCCAGCAGCAATTTGCAAGC
TET2	4	106156131	106156317	TET2_11	187	44	AAAGCTAGCGTCTGGTGAAGAAT	AAGAAGCAATTGTGATGGTGGTG	AAAGCTAGCGTCTGGTGAAGAATTCTGTTCAGGTTCCAGCAGCAATTTGCAAGCTCCTGGTGGCAGCTCTGAACGGTATTTAAAACAAAATGAAATGAATGGTGCTTACTTCAAGCAAAGCTCAGTGTTCACTAAGGATTCCTTTTCTGCCACTACCACACCACCACCACCATCACAATTGCTTCTT
TET2	4	106156234	106156433	TET2_12	200	47	GCTTACTTCAAGCAAAGCTCAGT	AGTGTTGTGTTACTTTGGTTGGG	GCTTACTTCAAGCAAAGCTCAGTGTTCACTAAGGATTCCTTTTCTGCCACTACCACACCACCACCACCATCACAATTGCTTCTTTCTCCCCCTCCTCCTCTTCCACAGGTTCCTCAGCTTCCTTCAGAAGGAAAAAGCACTCTGAATGGTGGAGTTTTAGAAGAACACCACCACTACCCCAACCAAAGTAACACAACACT
TET2	4	106156339	106156534	TET2_13	196	45	CAGGTTCCTCAGCTTCCTTCAG	TTTCAGAAAGCATCGGAGAAGGG	CAGGTTCCTCAGCTTCCTTCAGAAGGAAAAAGCACTCTGAATGGTGGAGTTTTAGAAGAACACCACCACTACCCCAACCAAAGTAACACAACACTTTTAAGGGAAGTGAAAATAGAGGGTAAACCTGAGGCACCACCTTCCCAGAGTCCTAATCCATCTACACATGTATGCAGCCCTTCTCCGATGCTTTCTGAAA
TET2	4	106156402	106156594	TET2_14	193	46	CACCACTACCCCAACCAAAGTAA	GAACAGTCATTGTCCCTGCAGTC	CACCACTACCCCAACCAAAGTAACACAACACTTTTAAGGGAAGTGAAAATAGAGGGTAAACCTGAGGCACCACCTTCCCAGAGTCCTAATCCATCTACACATGTATGCAGCCCTTCTCCGATGCTTTCTGAAAGGCCTCAGAATAATTGTGTGAACAGGAATGACATACAGACTGCAGGGACAATGACTGTTC
TET2	4	106156536	106156726	TET2_15	191	44	GCCTCAGAATAATTGTGTGAACAGG	CCTTCAGAATCTCTTGCTCTTTGTT	GCCTCAGAATAATTGTGTGAACAGGAATGACATACAGACTGCAGGGACAATGACTGTTCCATTGTGTTCTGAGAAAACAAGACCAATGTCAGAACACCTCAAGCATAACCCACCAATTTTTGGTAGCAGTGGAGAGCTACAGGACAACTGCCAGCAGTTGATGAGAAACAAAGAGCAAGAGATTCTGAAGG
TET2	4	106156630	106156829	TET2_16	200	49	CACCTCAAGCATAACCCACCAAT	GATTCCGCTTGGTGAAAACGAG	CACCTCAAGCATAACCCACCAATTTTTGGTAGCAGTGGAGAGCTACAGGACAACTGCCAGCAGTTGATGAGAAACAAAGAGCAAGAGATTCTGAAGGGTCGAGACAAGGAGCAAACACGAGATCTTGTGCCCCCAACACAGCACTATCTGAAACCAGGATGGATTGAATTGAAGGCCCCTCGTTTTCACCAAGCGGAATC
TET2	4	106156730	106156920	TET2_17	191	46	GAGACAAGGAGCAAACACGAGAT	TCCAGTGTATTGTTTGGAGGTCA	GAGACAAGGAGCAAACACGAGATCTTGTGCCCCCAACACAGCACTATCTGAAACCAGGATGGATTGAATTGAAGGCCCCTCGTTTTCACCAAGCGGAATCCCATCTAAAACGTAATGAGGCATCACTGCCATCAATTCTTCAGTATCAACCCAATCTCTCCAATCAAATGACCTCCAAACAATACACTGGA
TET2	4	106156847	106157031	TET2_18	185	46	AGGCATCACTGCCATCAATTCTT	TTGGGACTGCCCTTGATTCATTT	AGGCATCACTGCCATCAATTCTTCAGTATCAACCCAATCTCTCCAATCAAATGACCTCCAAACAATACACTGGAAATTCCAACATGCCTGGGGGGCTCCCAAGGCAAGCTTACACCCAGAAAACAACACAGCTGGAGCACAAGTCACAAATGTACCAAGTTGAAATGAATCAAGGGCAGTCCCAA
TET2	4	106156946	106157128	TET2_19	183	46	CAAGGCAAGCTTACACCCAGAA	ACAGTGACTGCACATGAGCTTTT	CAAGGCAAGCTTACACCCAGAAAACAACACAGCTGGAGCACAAGTCACAAATGTACCAAGTTGAAATGAATCAAGGGCAGTCCCAAGGTACAGTGGACCAACATCTCCAGTTCCAAAAACCCTCACACCAGGTGCACTTCTCCAAAACAGACCATTTACCAAAAGCTCATGTGCAGTCACTGT
TET2	4	106157033	106157219	TET2_20	187	44	GTACAGTGGACCAACATCTCCAG	GCCTGTTGATTCAAGTGCTGTTT	GTACAGTGGACCAACATCTCCAGTTCCAAAAACCCTCACACCAGGTGCACTTCTCCAAAACAGACCATTTACCAAAAGCTCATGTGCAGTCACTGTGTGGCACTAGATTTCATTTTCAACAAAGAGCAGATTCCCAAACTGAAAAACTTATGTCCCCAGTGTTGAAACAGCACTTGAATCAACAGGC
TET2	4	106157120	106157317	TET2_21	198	43	AGTCACTGTGTGGCACTAGATTT	GAGGGAGATGTGAACTCTGGGAT	AGTCACTGTGTGGCACTAGATTTCATTTTCAACAAAGAGCAGATTCCCAAACTGAAAAACTTATGTCCCCAGTGTTGAAACAGCACTTGAATCAACAGGCTTCAGAGACTGAGCCATTTTCAAACTCACACCTTTTGCAACATAAGCCTCATAAACAGGCAGCACAAACACAACCATCCCAGAGTTCACATCTCCCTC
TET2	4	106157217	106157409	TET2_22	193	42	GGCTTCAGAGACTGAGCCATTTT	TTGCTGATCATTGTTGCTTTGGG	GGCTTCAGAGACTGAGCCATTTTCAAACTCACACCTTTTGCAACATAAGCCTCATAAACAGGCAGCACAAACACAACCATCCCAGAGTTCACATCTCCCTCAAAACCAGCAACAGCAGCAAAAATTACAAATAAAGAATAAAGAGGAAATACTCCAGACTTTTCCTCACCCCCAAAGCAACAATGATCAGCAA
TET2	4	106157319	106157518	TET2_23	200	39	AAACCAGCAACAGCAGCAAAAAT	CCAGTCCCATTTGGACATTATGAG	AAACCAGCAACAGCAGCAAAAATTACAAATAAAGAATAAAGAGGAAATACTCCAGACTTTTCCTCACCCCCAAAGCAACAATGATCAGCAAAGAGAAGGATCATTCTTTGGCCAGACTAAAGTGGAAGAATGTTTTCATGGTGAAAATCAGTATTCAAAATCAAGCGAGTTCGAGACTCATAATGTCCAAATGGGACTGG
TET2	4	106157428	106157627	TET2_24	200	38	GGCCAGACTAAAGTGGAAGAATGT	TCTGAAACTAGGTGTGTATTGTTTGA	GGCCAGACTAAAGTGGAAGAATGTTTTCATGGTGAAAATCAGTATTCAAAATCAAGCGAGTTCGAGACTCATAATGTCCAAATGGGACTGGAGGAAGTACAGAATATAAATCGTAGAAATTCCCCTTATAGTCAGACCATGAAATCAAGTGCATGCAAAATACAGGTTTCTTGTTCAAACAATACACACCTAGTTTCAGA
TET2	4	106157537	106157732	TET2_25	196	36	ATCGTAGAAATTCCCCTTATAGTCAG	AGATCTTGCTTTGGGATCACATT	ATCGTAGAAATTCCCCTTATAGTCAGACCATGAAATCAAGTGCATGCAAAATACAGGTTTCTTGTTCAAACAATACACACCTAGTTTCAGAGAATAAAGAACAGACTACACATCCTGAACTTTTTGCAGGAAACAAGACCCAAAACTTGCATCACATGCAATATTTTCCAAATAATGTGATCCCAAAGCAAGATCT
TET2	4	106157639	106157835	TET2_26	197	40	AGACTACACATCCTGAACTTTTTGC	CGCAGCTTGTTGACCAGACATA	AGACTACACATCCTGAACTTTTTGCAGGAAACAAGACCCAAAACTTGCATCACATGCAATATTTTCCAAATAATGTGATCCCAAAGCAAGATCTTCTTCACAGGTGCTTTCAAGAACAGGAGCAGAAGTCACAACAAGCTTCAGTTCTACAGGGATATAAAAATAGAAACCAAGATATGTCTGGTCAACAAGCTGCG
TET2	4	106157744	106157943	TET2_27	200	45	GCTTTCAAGAACAGGAGCAGAAG	CTTTTGAGTGTCCTTCTGGGGAG	GCTTTCAAGAACAGGAGCAGAAGTCACAACAAGCTTCAGTTCTACAGGGATATAAAAATAGAAACCAAGATATGTCTGGTCAACAAGCTGCGCAACTTGCTCAGCAAAGGTACTTGATACATAACCATGCAAATGTTTTTCCTGTGCCTGACCAGGGAGGAAGTCACACTCAGACCCCTCCCCAGAAGGACACTCAAAAG
TET2	4	106157842	106158041	TET2_28	200	49	GCTCAGCAAAGGTACTTGATACA	ATTGGCCTGTGCATCTGACTATG	GCTCAGCAAAGGTACTTGATACATAACCATGCAAATGTTTTTCCTGTGCCTGACCAGGGAGGAAGTCACACTCAGACCCCTCCCCAGAAGGACACTCAAAAGCATGCTGCTCTAAGGTGGCATCTCTTACAGAAGCAAGAACAGCAGCAAACACAGCAACCCCAAACTGAGTCTTGCCATAGTCAGATGCACAGGCCAAT
TET2	4	106157959	106158155	TET2_29	197	46	TGGCATCTCTTACAGAAGCAAGAA	ACATTATCACAGCTTGCAGGTGG	TGGCATCTCTTACAGAAGCAAGAACAGCAGCAAACACAGCAACCCCAAACTGAGTCTTGCCATAGTCAGATGCACAGGCCAATTAAGGTGGAACCTGGATGCAAGCCACATGCCTGTATGCACACAGCACCACCAGAAAACAAAACATGGAAAAAGGTAACTAAGCAAGAGAATCCACCTGCAAGCTGTGATAATGT
TET2	4	106158049	106158244	TET2_30	196	45	GAACCTGGATGCAAGCCACAT	TGAGAGTAAGAGCCTTATGGTCAAA	GAACCTGGATGCAAGCCACATGCCTGTATGCACACAGCACCACCAGAAAACAAAACATGGAAAAAGGTAACTAAGCAAGAGAATCCACCTGCAAGCTGTGATAATGTGCAGCAAAAGAGCATCATTGAGACCATGGAGCAGCATCTGAAGCAGTTTCACGCCAAGTCGTTATTTGACCATAAGGCTCTTACTCTCA
TET2	4	106158130	106158319	TET2_31	190	44	AATCCACCTGCAAGCTGTGATAA	GTTCTGCAGCAGTGGTTTGTCTA	AATCCACCTGCAAGCTGTGATAATGTGCAGCAAAAGAGCATCATTGAGACCATGGAGCAGCATCTGAAGCAGTTTCACGCCAAGTCGTTATTTGACCATAAGGCTCTTACTCTCAAATCACAGAAGCAAGTAAAAGTTGAAATGTCAGGGCCAGTCACAGTTTTGACTAGACAAACCACTGCTGCAGAAC
TET2	4	106158244	106158443	TET2_32	200	41	AAATCACAGAAGCAAGTAAAAGTTGA	GGAGTATCTAGTAATTTGGAAGGTGA	AAATCACAGAAGCAAGTAAAAGTTGAAATGTCAGGGCCAGTCACAGTTTTGACTAGACAAACCACTGCTGCAGAACTTGATAGCCACACCCCAGCTTTAGAGCAGCAAACAACTTCTTCAGAAAAGACACCAACCAAAAGAACAGCTGCTTCTGTTCTCAATAATTTTATAGAGTCACCTTCCAAATTACTAGATACTCC
TET2	4	106158342	106158534	TET2_33	193	36	AGAGCAGCAAACAACTTCTTCAG	TGTCTCAGTACATTTCTGGCACT	AGAGCAGCAAACAACTTCTTCAGAAAAGACACCAACCAAAAGAACAGCTGCTTCTGTTCTCAATAATTTTATAGAGTCACCTTCCAAATTACTAGATACTCCTATAAAAAATTTATTGGATACACCTGTCAAGACTCAATATGATTTCCCATCTTGCAGATGTGTAGGTAAGTGCCAGAAATGTACTGAGACA
TET2	4	106158419	106158618	TET2_34	200	35	CACCTTCCAAATTACTAGATACTCCT	AATTGCTGCCAGACTCAAGATTT	CACCTTCCAAATTACTAGATACTCCTATAAAAAATTTATTGGATACACCTGTCAAGACTCAATATGATTTCCCATCTTGCAGATGTGTAGGTAAGTGCCAGAAATGTACTGAGACACATGGCGTTTATCCAGAATTAGCAAATTTATCTTCAGATATGGGATTTTCCTTCTTTTTTTAAATCTTGAGTCTGGCAGCAATT
TET2	4	106158494	106158687	TET2_35	194	36	CTTGCAGATGTGTAGGTAAGTGC	CTTTCACAAGACACAAGCATCGG	CTTGCAGATGTGTAGGTAAGTGCCAGAAATGTACTGAGACACATGGCGTTTATCCAGAATTAGCAAATTTATCTTCAGATATGGGATTTTCCTTCTTTTTTTAAATCTTGAGTCTGGCAGCAATTTGTAAAGGCTCATAAAAATCTGAAGCTTACATTTTTTGTCAAGTTACCGATGCTTGTGTCTTGTGAAAG
TET2	4	106162419	106162618	TET2_36	200	35	GGTTAAGCTTTGTGGATGTAGCC	GTTAATCTGCCCTGTGCCTTTG	GGTTAAGCTTTGTGGATGTAGCCTTTATATTTAGTATAATTGAGGTCTAAAATAATAATCTTCTATTATCTCAACAGAGCAAATTATTGAAAAAGATGAAGGTCCTTTTTATACCCATCTAGGAGCAGGTCCTAATGTGGCAGCTATTAGAGAAATCATGGAAGAAAGGTAATTAACGCAAAGGCACAGGGCAGATTAAC
TET2	4	106163962	106164161	TET2_37	200	40	GTGTGTGTGTTTCTGTGGGTTTC	ACCCAATTCTCAGGGTCAGATTTAC	GTGTGTGTGTTTCTGTGGGTTTCTTTAAGGTTTGGACAGAAGGGTAAAGCTATTAGGATTGAAAGAGTCATCTATACTGGTAAAGAAGGCAAAAGTTCTCAGGGATGTCCTATTGCTAAGTGGGTAAGTGTGACTTGATAAAGCCTTTGGTCTTAAATCTTGGGCATTTTGATTTGTAAATCTGACCCTGAGAATTGGGT
TET2	4	106164671	106164870	TET2_38	200	55	TTGTTTTGTTTTGGTTGGGGTGG	CGAGTAGAGTTTGTCAGCCAGAG	TTGTTTTGTTTTGGTTGGGGTGGGGGGTGTTTGGGATGGAATGGTGATCCACGCAGGTGGTTCGCAGAAGCAGCAGTGAAGAGAAGCTACTGTGTTTGGTGCGGGAGCGAGCTGGCCACACCTGTGAGGCTGCAGTGATTGTGATTCTCATCCTGGTGTGGGAAGGAATCCCGCTGTCTCTGGCTGACAAACTCTACTCG
TET2	4	106164806	106165005	TET2_39	200	54	TGATTGTGATTCTCATCCTGGTGT	CCTTTCAACCAAAGATTGGGCTTT	TGATTGTGATTCTCATCCTGGTGTGGGAAGGAATCCCGCTGTCTCTGGCTGACAAACTCTACTCGGAGCTTACCGAGACGCTGAGGAAATACGGCACGCTCACCAATCGCCGGTGTGCCTTGAATGAAGAGTAAGTGAAGCCCAGGGCCTCTCCCCTCTTTGCGGCCACTGATAGGAAAGCCCAATCTTTGGTTGAAAGG
TET2	4	106180715	106180897	TET2_40	183	45	TCAGCTGCACAGCCTATATAATG	ACTTCCTTGGGATCTTGCTTCTG	TCAGCTGCACAGCCTATATAATGCTATCCATAGCAATGAATTTGGTCTTTTGATTTTTCAGGAGAACTTGCGCCTGTCAGGGGCTGGATCCAGAAACCTGTGGTGCCTCCTTCTCTTTTGGTTGTTCATGGAGCATGTACTACAATGGATGTAAGTTTGCCAGAAGCAAGATCCCAAGGAAGT
TET2	4	106180806	106181005	TET2_41	200	39	AGAAACCTGTGGTGCCTCCT	TGTCATATTGTTCACTTCATCTAAGCTA	AGAAACCTGTGGTGCCTCCTTCTCTTTTGGTTGTTCATGGAGCATGTACTACAATGGATGTAAGTTTGCCAGAAGCAAGATCCCAAGGAAGTTTAAGCTGCTTGGGGATGACCCAAAAGAGGTTTGTTTACTTCCTGATGTATAATCGCTTTATTTTTCATAGAGAATTCATTAGCTTAGATGAAGTGAACAATATGACA
TET2	4	106182816	106182996	TET2_42	181	34	TGGGATTCAAAATGTAAGGGGAA	ATATGCATCAGGTGCAAGTTTCT	TGGGATTCAAAATGTAAGGGGAATAATCTAACTGATAGTCTCTTTTACATAGAGAAAATGGACTTAGAATTTAATATGTAGAATTATTCACTTTATACAGGAAGAGAAACTGGAGTCTCATTTGCAAAACCTGTCCACTCTTATGGCACCAACATATAAGAAACTTGCACCTGATGCATAT
TET2	4	106182948	106183139	TET2_43	192	30	GTCCACTCTTATGGCACCAACAT	TGCAGTGGTTTCAACAATTAAGAGG	GTCCACTCTTATGGCACCAACATATAAGAAACTTGCACCTGATGCATATAATAATCAGGTAAGTTTAAATAATCATTGGCAGCAATTGTAACAACTTACTTGTTACTAATGACCTATGTCCAAAAATATTTTTGAAACAATGATTTTTAAATATTATTCTAACTTTTCCTCTTAATTGTTGAAACCACTGCA
TET2	4	106190625	106190816	TET2_44	192	34	TGTGTCATTCCATTTTGTTTCTGGA	CCTTCCTTCAGACCCAGACG	TGTGTCATTCCATTTTGTTTCTGGATATATATTTAAGTTCAAAACATTTTTTTAAAGTTCTAAATGGTCTAAATACTAGTGAGTTTTCGGTGTAAGAGTAAAACTAACTACTTTCGCATTCACACACACTTTTATTTTTCAGATTGAATATGAACACAGAGCACCAGAGTGCCGTCTGGGTCTGAAGGAAGG
TET2	4	106190741	106190898	TET2_45	158	49	CATTCACACACACTTTTATTTTTCAGATT	GCTGCCATTCTGCATGTTGTG	CATTCACACACACTTTTATTTTTCAGATTGAATATGAACACAGAGCACCAGAGTGCCGTCTGGGTCTGAAGGAAGGCCGTCCATTCTCAGGGGTCACTGCATGTTTGGACTTCTGTGCTCATGCCCACAGAGACTTGCACAACATGCAGAATGGCAGC
TET2	4	106190790	106190983	TET2_46	194	51	AGAGTGCCGTCTGGGTCT	TACCCAGTCTTGCATATGTCTTT	AGAGTGCCGTCTGGGTCTGAAGGAAGGCCGTCCATTCTCAGGGGTCACTGCATGTTTGGACTTCTGTGCTCATGCCCACAGAGACTTGCACAACATGCAGAATGGCAGCACATTGGTAAGTTGGGCTGAGGACAGCTTAGCAGCTGTTGagtctgttctcacactgctaataaagacatatgcaagactgggta
TET2	4	106193658	106193838	TET2_47	181	46	ACACACACACACGTTTTCTTTGG	CTTCCACACTCCCAAACTCATCC	ACACACACACACGTTTTCTTTGGGACCTGTAGTTGAGGCTGTAATGTCTTACTTCCCTACCAGGTATGCACTCTCACTAGAGAAGACAATCGAGAATTTGGAGGAAAACCTGAGGATGAGCAGCTTCACGTTCTGCCTTTATACAAAGTCTCTGACGTGGATGAGTTTGGGAGTGTGGAAG
TET2	4	106193747	106193926	TET2_48	180	48	TCGAGAATTTGGAGGAAAACCTG	GTCTTGACTGGCTCTGCTAACAT	TCGAGAATTTGGAGGAAAACCTGAGGATGAGCAGCTTCACGTTCTGCCTTTATACAAAGTCTCTGACGTGGATGAGTTTGGGAGTGTGGAAGCTCAGGAGGAGAAAAAACGGAGTGGTGCCATTCAGGTACTGAGTTCTTTTCGGCGAAAAGTCAGGATGTTAGCAGAGCCAGTCAAGAC
TET2	4	106193840	106194026	TET2_49	187	46	TCAGGAGGAGAAAAAACGGAGTG	TGGGGCTGACTTTTCCTTTTCAT	TCAGGAGGAGAAAAAACGGAGTGGTGCCATTCAGGTACTGAGTTCTTTTCGGCGAAAAGTCAGGATGTTAGCAGAGCCAGTCAAGACTTGCCGACAAAGGAAACTAGAAGCCAAGAAAGCTGCAGCTGAAAAGCTTTCCTCCCTGGAGAACAGCTCAAATAAAAATGAAAAGGAAAAGTCAGCCCCA
TET2	4	106193931	106194127	TET2_50	197	39	CGACAAAGGAAACTAGAAGCCAA	TTTAATATACCACACAACACATTTATCTACA	CGACAAAGGAAACTAGAAGCCAAGAAAGCTGCAGCTGAAAAGCTTTCCTCCCTGGAGAACAGCTCAAATAAAAATGAAAAGGAAAAGTCAGCCCCATCACGTACAAAACAAACTGAAAACGCAAGCCAGGCTAAACAGTTGGCAGGTAAATTTAATGTAAAGCATTTGTAGATAAATGTGTTGTGTGGTATATTAAA
TET2	4	106196133	106196332	TET2_51	200	53	CTCACTAGCCTTCATAAAATAATCATCAA	CTCTGTCTGAGGGTGATGTG	CTCACTAGCCTTCATAAAATAATCATCAACATCAAAGATACCTGTTTCTGTTCTCTCTTACCCTGTCCACAGAACTTTTGCGACTTTCAGGACCAGTCATgcagcagtcccagcagccccagcctctacagaagcagccaccacagccccagcagcagcagagaccccagcagcagcagcCACATCACCCTCAGACAGAG
TET2	4	106196227	106196426	TET2_52	200	55	AGTCATGCAGCAGTCCCAG	CTGAAGTGTGTGAAGAGTTTGGA	AGTCATgcagcagtcccagcagccccagcctctacagaagcagccaccacagccccagcagcagcagagaccccagcagcagcagcCACATCACCCTCAGACAGAGTCTGTCAACTCTTATTCTGCTTCTGGATCCACCAATCCATACATGAGACGGCCCAATCCAGTTAGTCCTTATCCAAACTCTTCACACACTTCAG
TET2	4	106196335	106196523	TET2_53	189	43	TGTCAACTCTTATTCTGCTTCTGGA	GGGTAAGGGTTCATGGGATTAGAA	TGTCAACTCTTATTCTGCTTCTGGATCCACCAATCCATACATGAGACGGCCCAATCCAGTTAGTCCTTATCCAAACTCTTCACACACTTCAGATATCTATGGAAGCACCAGCCCTATGAACTTCTATTCCACCTCATCTCAAGCTGCAGGTTCATATTTGAATTCTTCTAATCCCATGAACCCTTACCC
TET2	4	106196428	106196623	TET2_54	196	43	TATCTATGGAAGCACCAGCCCTA	CTGGGGAGAATAGGAACCCAGAT	TATCTATGGAAGCACCAGCCCTATGAACTTCTATTCCACCTCATCTCAAGCTGCAGGTTCATATTTGAATTCTTCTAATCCCATGAACCCTTACCCTGGGCTTTTGAATCAGAATACCCAATATCCATCATATCAATGCAATGGAAACCTATCAGTGGACAACTGCTCCCCATATCTGGGTTCCTATTCTCCCCAG
TET2	4	106196515	106196714	TET2_55	200	48	CCCTTACCCTGGGCTTTTGAAT	ACCTTGGCTGGTAAAGTGTATGG	CCCTTACCCTGGGCTTTTGAATCAGAATACCCAATATCCATCATATCAATGCAATGGAAACCTATCAGTGGACAACTGCTCCCCATATCTGGGTTCCTATTCTCCCCAGTCTCAGCCGATGGATCTGTATAGGTATCCAAGCCAAGACCCTCTGTCTAAGCTCAGTCTACCACCCATCCATACACTTTACCAGCCAAGGT
TET2	4	106196601	106196788	TET2_56	188	45	ATCTGGGTTCCTATTCTCCCCAG	GCTGAAACCATCTCCCTGCATATT	ATCTGGGTTCCTATTCTCCCCAGTCTCAGCCGATGGATCTGTATAGGTATCCAAGCCAAGACCCTCTGTCTAAGCTCAGTCTACCACCCATCCATACACTTTACCAGCCAAGGTTTGGAAATAGCCAGAGTTTTACATCTAAATACTTAGGTTATGGAAACCAAAATATGCAGGGAGATGGTTTCAGC
TET2	4	106196691	106196887	TET2_57	197	42	TCCATACACTTTACCAGCCAAGG	TAATCTAGAGGTGGCTCCCATGA	TCCATACACTTTACCAGCCAAGGTTTGGAAATAGCCAGAGTTTTACATCTAAATACTTAGGTTATGGAAACCAAAATATGCAGGGAGATGGTTTCAGCAGTTGTACCATTAGACCAAATGTACATCATGTAGGGAAATTGCCTCCTTATCCCACTCATGAGATGGATGGCCACTTCATGGGAGCCACCTCTAGATTA
TET2	4	106196784	106196976	TET2_58	193	44	TCAGCAGTTGTACCATTAGACCAAA	GGAGCTGCACTGTAGTTATGGAT	TCAGCAGTTGTACCATTAGACCAAATGTACATCATGTAGGGAAATTGCCTCCTTATCCCACTCATGAGATGGATGGCCACTTCATGGGAGCCACCTCTAGATTACCACCCAATCTGAGCAATCCAAACATGGACTATAAAAATGGTGAACATCATTCACCTTCTCACATAATCCATAACTACAGTGCAGCTCC
TET2	4	106196928	106197120	TET2_59	193	45	GTGAACATCATTCACCTTCTCAC	TTGTGTAAGCCTCCTTGGACAC	GTGAACATCATTCACCTTCTCACATAATCCATAACTACAGTGCAGCTCCGGGCATGTTCAACAGCTCTCTTCATGCCCTGCATCTCCAAAACAAGGAGAATGACATGCTTTCCCACACAGCTAATGGGTTATCAAAGATGCTTCCAGCTCTTAACCATGATAGAACTGCTTGTGTCCAAGGAGGCTTACACAA
TET2	4	106197031	106197212	TET2_60	182	48	CATGCTTTCCCACACAGCTAATG	CTGACCAGACCTCATCGTTGTC	CATGCTTTCCCACACAGCTAATGGGTTATCAAAGATGCTTCCAGCTCTTAACCATGATAGAACTGCTTGTGTCCAAGGAGGCTTACACAAATTAAGTGATGCTAATGGTCAGGAAAAGCAGCCATTGGCACTAGTCCAGGGTGTGGCTTCTGGTGCAGAGGACAACGATGAGGTCTGGTCAG
TET2	4	106197129	106197327	TET2_61	199	53	ATGCTAATGGTCAGGAAAAGCAG	TTTAAAGGGGTTGTGGCATGCAG	ATGCTAATGGTCAGGAAAAGCAGCCATTGGCACTAGTCCAGGGTGTGGCTTCTGGTGCAGAGGACAACGATGAGGTCTGGTCAGACAGCGAGCAGAGCTTTCTGGATCCTGACATTGGGGGAGTGGCCGTGGCTCCAACTCATGGGTCAATTCTCATTGAGTGTGCAAAGCGTGAGCTGCATGCCACAACCCCTTTAAA
TET2	4	106197182	106197375	TET2_62	194	53	GGTGCAGAGGACAACGATGAG	TGGTAAAAGACGAGGGAGATCCT	GGTGCAGAGGACAACGATGAGGTCTGGTCAGACAGCGAGCAGAGCTTTCTGGATCCTGACATTGGGGGAGTGGCCGTGGCTCCAACTCATGGGTCAATTCTCATTGAGTGTGCAAAGCGTGAGCTGCATGCCACAACCCCTTTAAAGAATCCCAATAGGAATCACCCCACCAGGATCTCCCTCGTCTTTTACCA
TET2	4	106197305	106197501	TET2_63	197	48	CTGCATGCCACAACCCCTTTA	TGGGATTTCTGAGGCACATAGTC	CTGCATGCCACAACCCCTTTAAAGAATCCCAATAGGAATCACCCCACCAGGATCTCCCTCGTCTTTTACCAGCATAAGAGCATGAATGAGCCAAAACATGGCTTGGCTCTTTGGGAAGCCAAAATGGCTGAAAAAGCCCGTGAGAAAGAGGAAGAGTGTGAAAAGTATGGCCCAGACTATGTGCCTCAGAAATCCCA
TET2	4	106197425	106197603	TET2_64	179	49	AAAATGGCTGAAAAAGCCCGTGA	GTCACGGACATGGTCCTTTCG	AAAATGGCTGAAAAAGCCCGTGAGAAAGAGGAAGAGTGTGAAAAGTATGGCCCAGACTATGTGCCTCAGAAATCCCATGGCAAAAAAGTGAAACGGGAGCCTGCTGAGCCACATGAAACTTCAGAGCCCACTTACCTGCGTTTCATCAAGTCTCTTGCCGAAAGGACCATGTCCGTGAC
TET2	4	106197529	106197728	TET2_65	200	47	TGAGCCACATGAAACTTCAGAGC	ACAGGTTGGTTGTGGTCTTTTCA	TGAGCCACATGAAACTTCAGAGCCCACTTACCTGCGTTTCATCAAGTCTCTTGCCGAAAGGACCATGTCCGTGACCACAGACTCCACAGTAACTACATCTCCATATGCCTTCACTCGGGTCACAGGGCCTTACAACAGATATATATGATATCACCCCCTTTTGTTGGTTACCTCACTTGAAAAGACCACAACCAACCTGT
TERT	5	1253793	1253977	TERT_1	185	66	TGACAGGGCTGCTGGTGT	TCTGGAACGGAGTCTGATTTTGG	TGACAGGGCTGCTGGTGTCTGCTCTCGGCCTGGCTGTGGGCGGGTGGCCATCAGTCCAGGATGGTCTTGAAGTCTGAGGGCAGTGCCGGGTTGGCTGCGGCCTCCAGGGCAGTCAGCGTCGTCCCCGGGAGCTTCCGACTCAGCTGCGTCTGGGCTGCGGGGCCAAAATCAGACTCCGTTCCAGA
TERT	5	1254414	1254580	TERT_2	167	65	CCCCACACAGGGCGTTC	CTCCGAGGCCGTGCAGT	CCCCACACAGGGCGTTCAAGGATGACCCCTGGGCAGGTGGGGCCCGCACTGGCCTCCACCCACACTTGCCTGTCCTGAGTGACCCCAGGAGTGGCACGTAGGTGACACGGTGTCGAGTCAGCTTGAGCAGGAATGCTTGGTGGCACAGCCACTGCACGGCCTCGGAG
TERT	5	1254469	1254649	TERT_3	181	66	CCACCCACACTTGCCTGTC	GTGACTCCTCAGCCTCTGTTTTC	CCACCCACACTTGCCTGTCCTGAGTGACCCCAGGAGTGGCACGTAGGTGACACGGTGTCGAGTCAGCTTGAGCAGGAATGCTTGGTGGCACAGCCACTGCACGGCCTCGGAGGGCAGAGGGCCGGCGGCGCCCTTGGCCCCCAGCGACATCCCTGGGGGAAAACAGAGGCTGAGGAGTCAC
TERT	5	1255313	1255495	TERT_4	183	55	CTTCCTAAGCCCAGATTCACTCA	CATCAGCAAGTTTGGAAGAACCC	CTTCCTAAGCCCAGATTCACTCAGTCTCCTGACACACTAACACCAGCAGGCAGGCACTGCTGCCACTGAGGCCAGGCACCTGCACATACCTGCGTTCTTGGCTTTCAGGATGGAGTAGCAGAGGGAGGCCGTGTCAGAGATGACGCGCAGGAAAAATGTGGGGTTCTTCCAAACTTGCTGATG
TERT	5	1255396	1255575	TERT_5	180	54	ACATACCTGCGTTCTTGGCTTTC	CCGTCTGATTAGGAGGCCTTTC	ACATACCTGCGTTCTTGGCTTTCAGGATGGAGTAGCAGAGGGAGGCCGTGTCAGAGATGACGCGCAGGAAAAATGTGGGGTTCTTCCAAACTTGCTGATGAAATGGGAGCTGCAGCACACATGCGTGAAACCTGAGAGGATGGCGGACAGCGTCAGAGGAAAGGCCTCCTAATCAGACGG
TERT	5	1258617	1258805	TERT_6	189	61	AAACCCAGGAGTTCCAAGGTGAA	ACCGTTTCTCACTCTTTCTTGGC	AAACCCAGGAGTTCCAAGGTGAAGCCCCGGGTCAGAGGTGAGCAGAGCGCGGAGGGTCCCTGGAGGCTGGGCCTGCACCCCTTGGTGGCGGCTCACCTGTACGCCTGCAGCAGGAGGATCTTGTAGATGTTGGTGCACACCGTCTGGAGGCTGTTCACCTAGAGTCGCCAAGAAAGAGTGAGAAACGGT
TERT	5	1260479	1260671	TERT_7	193	56	GTGCAGCCAGTCACCATCAG	GCTTCAAGGCTGGGAGGAAC	GTGCAGCCAGTCACCATCAGCCTTGCAGGcacgcgcgcacacacacacacacatacttgcgcacacacCTCCTGAACTCTGAACTCTGTGCTGACCATCAGCCTGCTCACCTGCAAATCCAGAAACAGGCTGTGACACTTCAGCCGCAAGACCCCAAAGAGTTTGCGACGCATGTTCCTCCCAGCCTTGAAGC
TERT	5	1260599	1260793	TERT_8	195	59	AGAAACAGGCTGTGACACTTCAG	CTCTTTGGAGCAAGCTTTGCAG	AGAAACAGGCTGTGACACTTCAGCCGCAAGACCCCAAAGAGTTTGCGACGCATGTTCCTCCCAGCCTTGAAGCCGCGGTTGAAGGTGAGACTGGCTCTGATGGAGGTCCGGGCATAGCTGAGACACAGGGGGGAATGTCAGACACAGGTGCCTGCCCCACACCCAGCCCCCTCCTGCAAAGCTTGCTCCAAAGAG
TERT	5	1264459	1264651	TERT_9	193	66	CCCTGCAGCAGCACCT	TGGTGAACTTCCCTGTAGAAGAC	CCCTGCAGCAGCACCTGCCCCAGCCGGGCACAGGCTCCACTTCCGGCCAGGTGCGCTCACCTGGAGTAGTCGCTCTGCACCTCCAGGGTCCGGGTATCCAGCAGCAGGCCGCACCAGGGGAATAGGCCGTGGGCCGGCATCTGAACAAAAGCCGTGCCACCCAGGGCCTCGTCTTCTACAGGGAAGTTCACCA
TERT	5	1264567	1264766	TERT_10	200	63	CCGCACCAGGGGAATAGG	AGGTTACCTCCTGGGTGACG	CCGCACCAGGGGAATAGGCCGTGGGCCGGCATCTGAACAAAAGCCGTGCCACCCAGGGCCTCGTCTTCTACAGGGAAGTTCACCACTGTCTTCCGCAAGTTCACCACGCAGCCATACTCAGGGACACCTCGGACCAGGGTCCTAAGGCAGAGGGGCAATGTCAGCCCCAGGATGCGGGGCCGTCACCCAGGAGGTAACCT
TERT	5	1266520	1266718	TERT_11	199	51	CTCAACTGCAAAGCCCACAG	TCCCTCGTAGACAGATACTACGTAAA	CTCAACTGCAAAGCCCACAGGCTGTGGAGGTCCCCACAGACACACGGCACGGGCCTCACCTGAGGAAGGTTTTCGCGTGGGTGAGGTGAGGTGTCACCAACAAGAAATCATCCACCAAACGCAGGAGCAGCCTAAAATAAGGGAAAATACACAGCAAGGTTAACTTTACACTTTTTACGTAGTATCTGTCTACGAGGGA
TERT	5	1268581	1268777	TERT_12	197	63	ATCAAAAGCAAATCAACCCCCAC	CGTCTCTCACCTGTGTCTTCC	ATCAAAAGCAAATCAACCCCCACCCAAGCCCCCCTGGGGAAGAGGAGGCCTCACCCGTCCCGCCGAATCCCCGCAAACAGCTTGTTCTCCATGTCGCCGTAGCACAGGCTGCAGAGCAGCGTGGAGAGGATGGAGCCCTGCGGGATCCCCTGGCACTGGACGTAGGACCTGGGGCGGGAAGACACAGGTGAGAGACG
TERT	5	1271164	1271345	TERT_13	182	64	GAGGTGAGCAGAAGCCCTG	CATGTGTCTCCCGTCTGCTT	GAGGTGAGCAGAAGCCCTGCCAGCCCGCCCAGCCACCCGCAGGGCAATGGCACCTGGCCACCTGACTCACTTGCCCCTGATGCGCACGGCGTGGTGGCACATGAAGCGTAGGAAGACGTCGAAGAGGCCACTGCTGGCCTCATTCAGGGAGGAGCTCTGCGAAAGCAGACGGGAGACACATG
TERT	5	1272224	1272421	TERT_14	198	65	CATGAGCCCAGTGATTGCC	GCTCATGCCCTCTCCTCTG	CATGAGCCCAGTGATTGCCCAGGGGAGGACCCACTGCTGGGAGTCCGTGCCCAACCCTGCAGGGCAGTGCCCAGACCTGCTCGATGACGACGGCATCCCTCAGCGGGCTGGTCTCCTGCAGGTGAGCCACGAACTGTCGCATGTACGGCTGGAGGTCTGTCAAGGTAGAGACCTGCCGGCAGAGGAGAGGGCATGAGC
TERT	5	1278680	1278861	TERT_15	182	56	GACACGACTGCATTCTAGACACA	GGTCATCGCCAGCATCATCAAA	GACACGACTGCATTCTAGACACATTCATATCCCAGAGACACACATCCTGGACACGACTATCACACGTGAACCTTACGTGGCTCTTGAAGGCCTTGCGGACGTGCCCATGGGCGGCCTTCTGGACCACGGCATACCGACGCACGCAGTACGTGTTCTGGGGTTTGATGATGCTGGCGATGACC
TERT	5	1278745	1278937	TERT_16	193	62	GTGAACCTTACGTGGCTCTTGA	CAGTCTCCTCGCCTCCACT	GTGAACCTTACGTGGCTCTTGAAGGCCTTGCGGACGTGCCCATGGGCGGCCTTCTGGACCACGGCATACCGACGCACGCAGTACGTGTTCTGGGGTTTGATGATGCTGGCGATGACCTCCGTGAGCCTGTCCTGGGGGATGGTGTCGTACGCGCCCGTCACATCCACCTGTGTGAGTGGAGGCGAGGAGACTG
TERT	5	1279355	1279552	TERT_17	198	70	AGCCACTCCCAAGGTCCA	TTCAGCGTGCTCAACTACGAG	AGCCACTCCCAAGGTCCAGCAGGGCTGCTCACGGGGGTCCCCGGCACCCACCTTGACAAAGTACAGCTCAGGCGGCGGGTCCTGGGCCCGCACACGCAGCACGAAGGTGCGCCAGGCCCTGTGGATATCGTCCAGGCCCAGCACAGAGGCGCCCAGGAGGCCGGGGCGCCGCGCCCGCTCGTAGTTGAGCACGCTGAA
TERT	5	1279467	1279666	TERT_18	200	68	CAGGCCCTGTGGATATCGT	CTTCTCCCCTGGGTCCCTAT	CAGGCCCTGTGGATATCGTCCAGGCCCAGCACAGAGGCGCCCAGGAGGCCGGGGCGCCGCGCCCGCTCGTAGTTGAGCACGCTGAACAGTGCCTTCACCCTCGAGGTGAGACGCTCGGCCTGGCGGGGACAGCATGGGAGACAGTCAGGAAAGTGGATCCGGCCAAGTGCCCACCCCACCATAGGGACCCAGGGGAGAAG
TERT	5	1280208	1280407	TERT_19	200	56	GATACCAAATGTGGGGCTCAAAC	GTCAGGCAGCATCGGGAA	GATACCAAATGTGGGGCTCAAACGCACTTCTGTTTAAAAAGGAAGTTAAACCAAAGCACAGCCACCCTCTTTTCTCTGCGGAACGTTCTGGCTCCCACGACGTAGTCCATGTTCACAATCGGCCGCAGCCCGTCAGGCTTGGGGATGAAGCGGAGTCTGGACGTCAGCAGGGCGGGCCTGGCTTCCCGATGCTGCCTGAC
TERT	5	1280338	1280517	TERT_20	180	63	CGTCAGGCTTGGGGATGAAG	CCGTGAGCTTCCCCCTAGT	CGTCAGGCTTGGGGATGAAGCGGAGTCTGGACGTCAGCAGGGCGGGCCTGGCTTCCCGATGCTGCCTGACCTCTGCTTCCGACAGCTCCCGCAGCTGCACCCTCTTCAAGTGCTGTCTGCAATAGAGAGCCCCTCAGGAGGCTTGCTCAGCCAGACAACAGACTAGGGGGAAGCTCACGG
TERT	5	1282491	1282686	TERT_21	196	51	GGCTGGTGTTCCAGGACTTC	AAGTTCCTGCACTGGCTGATGA	GGCTGGTGTTCCAGGACTTCGAGAAGCAGAGGCCTGGCGTGGGGATACAGTACCTGATTCCAATGCTTTGCAACTTGCTCCAGACACTCTTCCGGTAGAAAAAGAGCCTGTTCTTTTGAAACGTGGTCTCCGTGACATAAAAGAAAGACCTGAGCAGCTCGACGACGTACACACTCATCAGCCAGTGCAGGAACTT
TERT	5	1282566	1282765	TERT_22	200	54	TGCTCCAGACACTCTTCCG	gatgtgGCATGTCCTTCTCGT	TGCTCCAGACACTCTTCCGGTAGAAAAAGAGCCTGTTCTTTTGAAACGTGGTCTCCGTGACATAAAAGAAAGACCTGAGCAGCTCGACGACGTACACACTCATCAGCCAGTGCAGGAACTTGGCCAGGATCTCCTCACGCAGACGGTGCTCTGCGGCCGGAACACAGCCAACCCCTTAAACGAGAAGGACATGCcacatc
TERT	5	1293359	1293538	TERT_23	180	63	CCCCCTTTTCTGAGCCCCTA	TCAGGAACACCAAGAAGTTCATCTC	CCCCCTTTTCTGAGCCCCTACTGCATTCAGCTCTGGGGCCTGGGCCCTCGACGGCCACCACCTCCTCACCTGGGCTCCTGCGCAGCCAAGCGCAGTCCCGCACGCTCATCTTCCACGTCAGCTCCTGCAGCGAGAGCTTGGCATGCTTCCCCAGGGAGATGAACTTCTTGGTGTTCCTGA
TERT	5	1293463	1293647	TERT_24	185	66	CTCATCTTCCACGTCAGCTCCT	CTCCGCCAGCACAGCA	CTCATCTTCCACGTCAGCTCCTGCAGCGAGAGCTTGGCATGCTTCCCCAGGGAGATGAACTTCTTGGTGTTCCTGAGGAAGCGGCGTTCGTTGTGCCTGGAGCCCCAGAGGCCTGGGGGCACCAGCCGGCGCAGGCAGGCCCGCACGAAGCCGTACACCTGCCAGGGGCTGCTGTGCTGGCGGAG
TERT	5	1293549	1293738	TERT_25	190	73	TTCGTTGTGCCTGGAGCC	AGCAGCCGGTGTCTGTG	TTCGTTGTGCCTGGAGCCCCAGAGGCCTGGGGGCACCAGCCGGCGCAGGCAGGCCCGCACGAAGCCGTACACCTGCCAGGGGCTGCTGTGCTGGCGGAGCAGCTGCACCAGGCGACGGGGGTCTGTGTCCTCCTCCTCGGGGGCCGCCACAGAGCCCTGGGGCTTCTCCCGGGCACAGACACCGGCTGCT
TERT	5	1293631	1293823	TERT_26	193	70	CTGCTGTGCTGGCGGAG	TTCTGGAGCTGCTTGGGAAC	CTGCTGTGCTGGCGGAGCAGCTGCACCAGGCGACGGGGGTCTGTGTCCTCCTCCTCGGGGGCCGCCACAGAGCCCTGGGGCTTCTCCCGGGCACAGACACCGGCTGCTGGGGTGACCGCAGCTCGCAGCGGGCAGTGCGTCTTGAGGAGCACCCCGTAGGGGCACTGCGCGTGGTTCCCAAGCAGCTCCAGAA
TERT	5	1293739	1293920	TERT_27	182	68	GGGGTGACCGCAGCTC	GTGGAGACCATCTTTCTGGGTTC	GGGGTGACCGCAGCTCGCAGCGGGCAGTGCGTCTTGAGGAGCACCCCGTAGGGGCACTGCGCGTGGTTCCCAAGCAGCTCCAGAAACAGGGGCCGCATTTGCCAGTAGCGCTGGGGCAGGCGGGGCAACCTGCGGGGAGTCCCTGGCATCCAGGGCCTGGAACCCAGAAAGATGGTCTCCAC
TERT	5	1293821	1294018	TERT_28	198	65	GAAACAGGGGCCGCATTTG	CCAAGCACTTCCTCTACTCCTCA	GAAACAGGGGCCGCATTTGCCAGTAGCGCTGGGGCAGGCGGGGCAACCTGCGGGGAGTCCCTGGCATCCAGGGCCTGGAACCCAGAAAGATGGTCTCCACGAGCCTCCGAGCGCCAGTCAGGCTGGGCCTCAGAGAGCTGAGTAGGAAGGAGGGCCGCAGCTGCTCCTTGTCGCCTGAGGAGTAGAGGAAGTGCTTGG
TERT	5	1293895	1294083	TERT_29	189	65	CTGGAACCCAGAAAGATGGTCTC	CCCCCCATCCACATCGC	CTGGAACCCAGAAAGATGGTCTCCACGAGCCTCCGAGCGCCAGTCAGGCTGGGCCTCAGAGAGCTGAGTAGGAAGGAGGGCCGCAGCTGCTCCTTGTCGCCTGAGGAGTAGAGGAAGTGCTTGGTCTCGGCGTACACCGGGGGACAAGGCGTGTCCCAGGGACGTGGTGGCCGCGATGTGGATGGGGGG
TERT	5	1293998	1294187	TERT_30	190	68	AGGAGTAGAGGAAGTGCTTGGT	GTGGTGTCACCTGCCAGAC	AGGAGTAGAGGAAGTGCTTGGTCTCGGCGTACACCGGGGGACAAGGCGTGTCCCAGGGACGTGGTGGCCGCGATGTGGATGGGGGGCCCGCGTGGTGCTGGCGGCCCACGGATGGGTGGGAGTGGCGCGTGCCAGAGAGCGCACCCTCCAAAGAGGTGGCTTCTTCGGCGGGTCTGGCAGGTGACACCAC
TERT	5	1294134	1294314	TERT_31	181	70	GAGCGCACCCTCCAAAGAG	CCGAAGTCTGCCGTTGCC	GAGCGCACCCTCCAAAGAGGTGGCTTCTTCGGCGGGTCTGGCAGGTGACACCACACAGAAACCACGGTCACTCGGTCCACGCGTCCTGCCCGGGTGGGCCCAGGACCCCTGCCCAACGGGCGTCCGCTCCGGCTCAGGGGCAGCGCCACGCCTGGGCCTCTTGGGCAACGGCAGACTTCGG
TERT	5	1294237	1294435	TERT_32	199	74	GACCCCTGCCCAACGG	ACGCTAGTGGACCCCGAAG	GACCCCTGCCCAACGGGCGTCCGCTCCGGCTCAGGGGCAGCGCCACGCCTGGGCCTCTTGGGCAACGGCAGACTTCGGCTGGCACTGCCCCCGCGCCTCCTCGCACCCGGGGCTGGCAGGCCCAGGGGGACCCCGGCCTCCCTGACGCTATGGTTCCAGGCCCGTTCGCATCCCAGACGCCTTCGGGGTCCACTAGCGT
TERT	5	1294373	1294567	TERT_33	195	70	CCTCCCTGACGCTATGGTTC	GCGACGACGTGCTGGT	CCTCCCTGACGCTATGGTTCCAGGCCCGTTCGCATCCCAGACGCCTTCGGGGTCCACTAGCGTGTGGCGGGGGCCGGGCCTGAGTGGCAGCGCCGAGCTGGTACAGCGGCGGCCCGCACACCTGGTAGGCGCAGCTGGGAGCCACCAGCACAAAGAGCGCGCAGCGTGCCAGCAGGTGAACCAGCACGTCGTCGC
TERT	5	1294512	1294711	TERT_34	200	74	AGCCACCAGCACAAAGAGC	TGGCCTTCGGCTTCGC	AGCCACCAGCACAAAGAGCGCGCAGCGTGCCAGCAGGTGAACCAGCACGTCGTCGCCCACGCGGCGCAGCAGCAGCCCCCACGCCCCGCTCCCCCGCAGTGCGTCGGTCACCGTGTTGGGCAGGTAGCTGCGCACGCTGGTGGTGAAGGCCTcgggggggcccccgcgggccccgTCCAGCAGCGCGAAGCCGAAGGCCA
TERT	5	1294645	1294830	TERT_35	186	73	ACGCTGGTGGTGAAGGC	AGCGACATGCGGAGAGC	ACGCTGGTGGTGAAGGCCTcgggggggcccccgcgggccccgTCCAGCAGCGCGAAGCCGAAGGCCAGCACGTTCTTCGCGCCGCGCTCGCACAGCCTCTGCAGCACTCGGGCCACCAGCTCCTTCAGGCAGGACACCTGCGGGGGAAGCGCCCTGAGTCGCCTGCGCTGCTCTCCGCATGTCGCT
TERT	5	1294843	1295039	TERT_36	197	81	CCGCCCTCAACCCCAG	GCCGCTGGCCACGTTC	CCGCCCTCAACCCCAGCCGGACGCCGACCCCGGGGAGGCCCACCTGGCGGAAGGAgggggcggcggggggcggccgTGCGTCCCAGGGCACGCACACCAGGCACTGGGCCACCAGCGCGCGGAAAGCCGCCGGGTCCCCGCGCTGCACCAGCCGCCAGCCCTGGGGCCCCAGGCGCCGCACGAACGTGGCCAGCGGC
TERT	5	1294953	1295139	TERT_37	187	79	ACCAGCGCGCGGAAAG	GCACGTGGGAAGCCCTG	ACCAGCGCGCGGAAAGCCGCCGGGTCCCCGCGCTGCACCAGCCGCCAGCCCTGGGGCCCCAGGCGCCGCACGAACGTGGCCAGCGGCAGCACCTCGCGGTAGTGGCTGCGCAGCAGGGAGCGCACGGCTCGGCAGCGGGGAGCGCGCGGCATCGCGGGGGTGGCCGGGGCCAGGGCTTCCCACGTGC
MRPS30	5	44809019	44809218	MRPS30_1	200	64	GGACAATTGCTTAAGTTGACCTCT	TCATGGAGGCCACAATCGG	GGACAATTGCTTAAGTTGACCTCTGGGTCCGGAATCGCGGGCAAAGATGGCGGCGGCCAGGTGTTGGAGGCCTTTGCTACGCGGTCCGAGGCTTTCATTGCACACCGCGGCTAATGCCGCCGCCACGGCTACAGAAACGACCTGCCAAGACGTCGCGGCGACCCCCGTCGCGCGGTACCCGCCGATTGTGGCCTCCATGA
MRPS30	5	44809142	44809332	MRPS30_2	191	64	CACGGCTACAGAAACGACCT	TCATAAACTGCATCTTGGTGAGGA	CACGGCTACAGAAACGACCTGCCAAGACGTCGCGGCGACCCCCGTCGCGCGGTACCCGCCGATTGTGGCCTCCATGACAGCCGACAGCAAAGCTGCACGGCTGCGGCGGATCGAGCGCTGGCAGGCGACGGTGCACGCTGCGGAGTCGGTAGACGAGAAGCTGCGAATCCTCACCAAGATGCAGTTTATGA
MRPS30	5	44809281	44809470	MRPS30_3	190	61	GCGGAGTCGGTAGACGAGAAG	CAGGTTCAGGTTCGGGTTCG	GCGGAGTCGGTAGACGAGAAGCTGCGAATCCTCACCAAGATGCAGTTTATGAAGTACATGGTTTACCCGCAGACCTTCGCGCTGAATGCCGACCGCTGGTACCAGTACTTCACCAAGACCGTGTTCCTGTCGGGTCTGCCGCCGCCCCCAGCGgagcccgagcccgagcccgaacccgaacctgaaccTG
MRPS30	5	44809400	44809597	MRPS30_4	198	70	CGTGTTCCTGTCGGGTCTG	TCCAGGAAGGGCAAAGATATGAC	CGTGTTCCTGTCGGGTCTGCCGCCGCCCCCAGCGgagcccgagcccgagcccgaacccgaacctgaaccTGCGCTGGACCTCGCGGCGCTGCGTGCGGTCGCCTGCGACTGCCTGCTGCAGGAGCACTTCTACCTGCGGCGCAGGCGGCGCGTGCACCGTTACGAGGAGAGCGAGGTCATATCTTTGCCCTTCCTGGA
MRPS30	5	44809513	44809712	MRPS30_5	200	66	TGCTGCAGGAGCACTTCTA	CAATCCCCATCTCTCCCTTCC	TGCTGCAGGAGCACTTCTACCTGCGGCGCAGGCGGCGCGTGCACCGTTACGAGGAGAGCGAGGTCATATCTTTGCCCTTCCTGGATCAGCTGGTGTCAACCCTCGTGGGCCTCCTCAGCCCACACAACCCGGCCCTGGCCGCTGCCGCCCTCGGTGAGCCTTGGATTCCGCCCCAGGGCGGAAGGGAGAGATGGGGATTG
MRPS30	5	44810984	44811179	MRPS30_6	196	33	AACCCAGACTCTTACCTCAATCA	CTCTTCGATGACCACGAGGAATA	AACCCAGACTCTTACCTCAATCATTCCTAAGTTATCATTTGCTAAGTTAGTACTCTTTAGTGTTCTAATAGTAACCAAATTTATTTAGATGATCAGATGAAAAAAATTTTGAATATCTTTTTGATAGATTATAGATGCCCAGTTCATTTTTACTGGGTGCGTGGTGAAGAAATTATTCCTCGTGGTCATCGAAGAG
MRPS30	5	44811129	44811321	MRPS30_7	193	40	ATTTTTACTGGGTGCGTGGTGAA	TCAACCTGCCTATGACAAATCCT	ATTTTTACTGGGTGCGTGGTGAAGAAATTATTCCTCGTGGTCATCGAAGAGGTCGAATTGATGACTTGCGATACCAGATAGATGATAAACCAAACAACCAGATTCGAATATCCAAGCAACTCGCAGAGGTAAGGATTTATTGCGATTATGTATCTATTGATATCTCGTGTAGGATTTGTCATAGGCAGGTTGA
MRPS30	5	44811978	44812177	MRPS30_8	200	33	GTTGCTGTGAATTTAGTATGTCTTTTCT	TGCATACGACACTTGGAACACAT	GTTGCTGTGAATTTAGTATGTCTTTTCTTTTTCTTTAAGTTTGTGCCATTGGATTATTCTGTTCCTATAGAAATCCCCACTATAAAATGTAAACCAGACAAACTTCCATTATTCAAACGGCAGTATGAAAACCACATATTTGTTGGTAAGTTTCTCTTTTGACATATTGTACCATAAATGTGTTCCAAGTGTCGTATGCA
MRPS30	5	44813131	44813295	MRPS30_9	165	39	GGCTCAAATACTAAAACATGTGCTCC	TGTCTCAAAAGCCTTTCCCTTCT	GGCTCAAATACTAAAACATGTGCTCCACATGTTCTACATGTTTGTTTCATCTGAAATGTTTTTATTTTGCTCTTCAGGCTCAAAAACTGCAGATCCTTGCTGTTACGGTCACACCCAGTTTCATCTGTTACCTGACAAATTAAGAAGGGAAAGGCTTTTGAGACA
MRPS30	5	44813241	44813429	MRPS30_10	189	35	ACACCCAGTTTCATCTGTTACCT	TGTTACAAATACCTTCAAAGAAAATGCT	ACACCCAGTTTCATCTGTTACCTGACAAATTAAGAAGGGAAAGGCTTTTGAGACAAAACTGTGCTGATCAGATAGAAGTTGTTTTTAGAGCTAATGCTATTGCAAGCCTTTTTGCTTGGACTGGAGCACAAGCTATGTATCAAGGTAAAAATTAATTTTATAGCATTTTCTTTGAAGGTATTTGTAACA
MRPS30	5	44814943	44815138	MRPS30_11	196	38	TGTCTAATGTGATTGTTTTGTTTGGGT	TGATCAGCTTGTGTAGTCAGTGC	TGTCTAATGTGATTGTTTTGTTTGGGTAAGATATATTCTATGTGTAAATTTCAGCATAACTTTCTTCTACAGGATTCTGGAGTGAAGCAGATGTTACTCGACCTTTTGTCTCCCAGGCTGTGATCACAGATGGAAAATACTTTTCCTTTTTCTGCTACCAGCTAAATACTTTGGCACTGACTACACAAGCTGATCA
MRPS30	5	44815038	44815237	MRPS30_12	200	37	ACTCGACCTTTTGTCTCCCA	AGAACATCATCATTAAAACCTTTCACA	ACTCGACCTTTTGTCTCCCAGGCTGTGATCACAGATGGAAAATACTTTTCCTTTTTCTGCTACCAGCTAAATACTTTGGCACTGACTACACAAGCTGATCAAAATAACCCTCGTAAAAATATATGTTGGGGTACACAAAGTAAGCCTCTTTATGAAACAATTGAGGATAATGATGTGAAAGGTTTTAATGATGATGTTCT
MRPS30	5	44815160	44815339	MRPS30_13	180	33	ATGTTGGGGTACACAAAGTAAGC	AAATATTCCCACAGTTCTCAATCAAAT	ATGTTGGGGTACACAAAGTAAGCCTCTTTATGAAACAATTGAGGATAATGATGTGAAAGGTTTTAATGATGATGTTCTACTTCAGATAGTTCACTTTCTACTGAATAGACCAAAAGAAGAAAAATCACAGCTGTTGGAAAACTGAAAAAGCATATTTGATTGAGAACTGTGGGAATATTT
MAP3K1	5	56111283	56111473	MAP3K1_1	191	74	CGCGCTCACGCAGTTG	CTGCCTCAGGGCTCGT	CGCGCTCACGCAGTTGGCGCAGGAGGCCTTACGCTGGCGGCGCAGTGCCCGCCCCCTGCGCTCTCCCCGCCCCCTCCCTCCCTCGCAGGGGCCGAGCGAATGTAGCCCGCGAGAGAAAATGGCGGCGGCGGCGGGGAATCGCGCCTCGTCGTCGGGATTCCCGGGCGCCAGGGCTACGAGCCCTGAGGCAG
MAP3K1	5	56111425	56111616	MAP3K1_2	192	78	GCCTCGTCGTCGGGATT	CTGGTCCAGCTCCACACTC	GCCTCGTCGTCGGGATTCCCGGGCGCCAGGGCTACGAGCCCTGAGGCAGGCGGCGGCGGAGGAGCCCTCAAGGCGAGCAGCGCGCCCGCGGCTGCCGCGGGACTGCTGCGGGAGGCGGGCAGCGGGGGCCGCGAGCGGGCGGACTGGCGGCGGCGGCAGCTGCGCAAAGTGCGGAGTGTGGAGCTGGACCAG
MAP3K1	5	56111487	56111676	MAP3K1_3	190	76	AGCCCTCAAGGCGAGCA	CGACGGGGAAGTCGAGGA	AGCCCTCAAGGCGAGCAGCGCGCCCGCGGCTGCCGCGGGACTGCTGCGGGAGGCGGGCAGCGGGGGCCGCGAGCGGGCGGACTGGCGGCGGCGGCAGCTGCGCAAAGTGCGGAGTGTGGAGCTGGACCAGCTGCCTGAGCAGCCGCTCTTCCTTGCCGCCTCACCGCCGGCCTCCTCGACTTCCCCGTCG
MAP3K1	5	56111590	56111782	MAP3K1_4	193	75	AAAGTGCGGAGTGTGGAGC	CCGACTCGGTAAGGTGGG	AAAGTGCGGAGTGTGGAGCTGGACCAGCTGCCTGAGCAGCCGCTCTTCCTTGCCGCCTCACCGCCGGCCTCCTCGACTTCCCCGTCGCCGGAGCCCGCGGACGCAGCGGGGAGTGGGACCGGCTTCCAGCCTGTGGCGGTGCCGCCGCCCCACGGAGCCGCGAGCCGCGGCGGCGCCCACCTTACCGAGTCGG
MAP3K1	5	56111688	56111867	MAP3K1_5	180	81	GGACGCAGCGGGGAGT	GCAGGAGACGGCTCGG	GGACGCAGCGGGGAGTGGGACCGGCTTCCAGCCTGTGGCGGTGCCGCCGCCCCACGGAGCCGCGAGCCGCGGCGGCGCCCACCTTACCGAGTCGGTGGCGGCGCCGGACAGCGGCGCCTCGAGTCCCGCAGCGGCCGAGCCCGGGGAGAAGCGGGCGCCCGCCGCCGAGCCGTCTCCTGC
MAP3K1	5	56111762	56111926	MAP3K1_6	165	81	GCGCCCACCTTACCGAG	CCCGCTCTCCAAGTCCC	GCGCCCACCTTACCGAGTCGGTGGCGGCGCCGGACAGCGGCGCCTCGAGTCCCGCAGCGGCCGAGCCCGGGGAGAAGCGGGCGCCCGCCGCCGAGCCGTCTCCTGCAGCGGCCCCCGCCGGGTGAGCAGCACGGCCGGGGTCGCGGCGGGGACTTGGAGAGCGGG
MAP3K1	5	56152348	56152527	MAP3K1_7	180	38	ACCATCCATTCTGTTTGTTCTTGG	GCATACAGGTTGCCTTCAGTTTC	ACCATCCATTCTGTTTGTTCTTGGAAATTATTTTTCATATATACATTTCTCATTTTATTTGTTTCTGCCTGCATTTTAGTCGTGAGATGGAGAATAAAGAAACTCTCAAAGGGTTGCACAAGATGGATGATCGTCCAGAGGAACGAATGATCAGGGAGAAACTGAAGGCAACCTGTATGC
MAP3K1	5	56152445	56152629	MAP3K1_8	185	48	AGAAACTCTCAAAGGGTTGCACA	CCATTTCCTCCTATGCTTTCTTCCT	AGAAACTCTCAAAGGGTTGCACAAGATGGATGATCGTCCAGAGGAACGAATGATCAGGGAGAAACTGAAGGCAACCTGTATGCCAGCCTGGAAGCACGAATGGTTGGAAAGGAGAAATAGGCGAGGGCCTGTGGTAAGTGGCTATGGGTTACCAGTTATAAGGAAGAAAGCATAGGAGGAAATGG
MAP3K1	5	56155466	56155660	MAP3K1_9	195	41	TCCTAGTCTATGATATTTACATTTACTTACCT	GGACTGCGTCGGCCTTT	TCCTAGTCTATGATATTTACATTTACTTACCTTTTATATTTTTAAGTAATCAAAATATTGGAATACTTTGATTCAGGTGGTAAAACCAATCCCAGTTAAAGGAGATGGATCTGAAATGAATCACTTAGCAGCTGAGTCTCCAGGAGAGGTCCAGGCAAGTGCGGCTTCACCAGCTTCCAAAGGCCGACGCAGTCC
MAP3K1	5	56155556	56155750	MAP3K1_10	195	51	CCCAGTTAAAGGAGATGGATCTGAAA	TAACTTACAGGCACTGGGGAAAC	CCCAGTTAAAGGAGATGGATCTGAAATGAATCACTTAGCAGCTGAGTCTCCAGGAGAGGTCCAGGCAAGTGCGGCTTCACCAGCTTCCAAAGGCCGACGCAGTCCTTCTCCTGGCAACTCCCCATCAGGTCGCACAGTGAAATCAGAATCTCCAGGAGTAAGGAGAAAAAGAGTTTCCCCAGTGCCTGTAAGTTA
MAP3K1	5	56155681	56155874	MAP3K1_11	194	38	CAGGTCGCACAGTGAAATCAGAA	CCCCATCCTCAGGGGTCT	CAGGTCGCACAGTGAAATCAGAATCTCCAGGAGTAAGGAGAAAAAGAGTTTCCCCAGTGCCTGTAAGTTAATGTTACAACAAATATGTTAGTTTTTATAATTTTTAGCTTCATTTATAACAAAGAAAAGACTGGCCAGCCATCTGTTAGAAcatcagttttcaaaatatgatctgcagacccctgaggatgggg
MAP3K1	5	56160491	56160673	MAP3K1_12	183	44	tgcctgaccGGATAATAGTTTCT	AGTCTGGCCCGCATCACT	tgcctgaccGGATAATAGTTTCTTAATTAAGAAATGAGAAACGTACCTAATAAAAAAAAATGTTGTGAAGTTTCAGAGTGGCAGAATCACACCACCCCGAAGAGCCCCTTCACCAGATGGCTTCTCACCATATAGCCCTGAGGAAACAAACCGCCGTGTTAACAAAGTGATGCGGGCCAGACT
MAP3K1	5	56160614	56160800	MAP3K1_13	187	46	CTCACCATATAGCCCTGAGGAA	ACTACTACTAATAAAGTATAAAATGGTGACGAA	CTCACCATATAGCCCTGAGGAAACAAACCGCCGTGTTAACAAAGTGATGCGGGCCAGACTGTACTTACTGCAGCAGATAGGGCCTAACTCTTTCCTGATTGGAGGAGACAGCCCAGACAATAAATACCGGGTGTTTATTGGGCCTCAGGTAGGATTCGTCACCATTTTATACTTTATTAGTAGTAGT
MAP3K1	5	56161112	56161308	MAP3K1_14	197	36	AGTTCTTGTGAACCACAGATGTA	ACTCTAAGCATTTATTAAAAACTACCTCAAAA	AGTTCTTGTGAACCACAGATGTATTAACCTATAGGTTTTCTTTTTAACTCTTTAGAACTGCAGCTGTGCACGTGGAACATTCTGTATTCATCTGCTATTTGTGATGCTCCGGGTGTTTCAACTAGAACCTTCAGACCCAATGTTATGGAGAAAAACTTTAAAGAATTTTGAGGTAGTTTTTAATAAATGCTTAGAGT
MAP3K1	5	56161237	56161416	MAP3K1_15	180	28	AACCTTCAGACCCAATGTTATGGA	AAGCATCAACTAATTCTTACATACCTTCA	AACCTTCAGACCCAATGTTATGGAGAAAAACTTTAAAGAATTTTGAGGTAGTTTTTAATAAATGCTTAGAGTAAAATTGTTAGCATATTCTTAGGATATATTCTTAAAATTTATCCTTCACTAAATTTAGGCAGTGACCATTTTAAAGGTGTGAAGGTATGTAAGAATTAGTTGATGCTT
MAP3K1	5	56161536	56161727	MAP3K1_16	192	34	GCTCTTAAATCAACTTTATGAAAAACATGCAA	GATGGTGTTACGAGATGGAGCTT	GCTCTTAAATCAACTTTATGAAAAACATGCAAATTAAAGATAAATAATTCAGCCTCTAGAACTCTTCATATGTATAATTATGGCACAAATATCATTGTTACTGTCTTTTTCCAATGTTAGGTTGAGAGTTTGTTCCAGAAATATCACAGTAGGCGTAGCTCAAGGATCAAAGCTCCATCTCGTAACACCATC
MAP3K1	5	56161677	56161862	MAP3K1_17	186	37	TATCACAGTAGGCGTAGCTCAAG	ACCCCTAAAATTAAAAGTAACACTGG	TATCACAGTAGGCGTAGCTCAAGGATCAAAGCTCCATCTCGTAACACCATCCAGAAGTTTGTTTCACGCATGTCAAATTCTCATACATTGTCATCATCTAGTACTTCTACGTCTAGTTCAGAAAACAGGTTAGTACTTTTTAAGGATTTCAAACATTAATCCAGTGTTACTTTTAATTTTAGGGGT
MAP3K1	5	56167660	56167843	MAP3K1_18	184	40	GCAGAAAGTGTTTTTAGCATATCCGT	GGTGGTGCAGCTTGTTCCT	GCAGAAAGTGTTTTTAGCATATCCGTTCTACTTTATATTCTTTTATGCTTAATACTTTTTCTTCCCCTTTTCTATAGCATAAAGGATGAAGAGGAACAGATGTGTCCTATTTGCTTGTTGGGCATGCTTGATGAAGAAAGTCTTACAGTGTGTGAAGACGGCTGCAGGAACAAGCTGCACCACC
MAP3K1	5	56167735	56167914	MAP3K1_19	180	45	AGCATAAAGGATGAAGAGGAACA	GTTAGCTCAGAGAGCAACTGTG	AGCATAAAGGATGAAGAGGAACAGATGTGTCCTATTTGCTTGTTGGGCATGCTTGATGAAGAAAGTCTTACAGTGTGTGAAGACGGCTGCAGGAACAAGCTGCACCACCACTGCATGTCAATTTGTATGTGGCTCTTTTTCTCCCTATGCTTACTCAACACAGTTGCTCTCTGAGCTAAC
MAP3K1	5	56168318	56168517	MAP3K1_20	200	26	CTGCTGTGTTTACTTGCTTTCAG	ACAAAGGGGACATATTAAAGGTTCT	CTGCTGTGTTTACTTGCTTTCAGATAAACATTTAATTAGATTATTTTTGAGGTTCCTTCTATATAAATTCTATAATTATAAACAGTTATGAAATAAAAATAATGTTAAACATTTACATTTTTGTAAGATTTTGTTTCTGTAATTTTTCAGGGGCAGAAGAGTGTAGAAGAAATAGAGAACCTTTAATATGTCCCCTTTGT
MAP3K1	5	56168455	56168618	MAP3K1_21	164	30	TGTAATTTTTCAGGGGCAGAAGAG	AAATTAAGACAAACCACACTGAGAAA	TGTAATTTTTCAGGGGCAGAAGAGTGTAGAAGAAATAGAGAACCTTTAATATGTCCCCTTTGTAGATCTAAGTGGAGATCTCATGATTTCTACAGGTAATAATTTTGAAATGATACGGATATGTTTAATTTTTAAAAATTTCTCAGTGTGGTTTGTCTTAATTT
MAP3K1	5	56168589	56168788	MAP3K1_22	200	41	AAAATTTCTCAGTGTGGTTTGTCTT	GCTGAGTTCCATAATGAGTAAGGTT	AAAATTTCTCAGTGTGGTTTGTCTTAATTTTTTTAAAGCAAGTTTTGTTATTTTTCATTTTAGCCACGAGTTGTCAAGTCCTGTGGATTCCCCTTCTTCCCTCAGAGCTGCACAGCAGCAAACCGTACAGCAGCAGCCTTTGGCTGGATCACGAAGGAATCAAGAGAGCAATTTTAACCTTACTCATTATGGAACTCAGC
MAP3K1	5	56168670	56168866	MAP3K1_23	197	44	TGTGGATTCCCCTTCTTCCCT	TTCTTTGAGAAATGAAAAACAAAGAACTAC	TGTGGATTCCCCTTCTTCCCTCAGAGCTGCACAGCAGCAAACCGTACAGCAGCAGCCTTTGGCTGGATCACGAAGGAATCAAGAGAGCAATTTTAACCTTACTCATTATGGAACTCAGCAAATCCCTCCTGCTTACAAAGATTTAGCTGAGCCATGGATTCAGGTAAGTAGTTCTTTGTTTTTCATTTCTCAAAGAA
MAP3K1	5	56170789	56170988	MAP3K1_24	200	46	GCTAAACTCAAAATGCTCTGGGT	AATTTCCAGTGCTCTCCCCATTT	GCTAAACTCAAAATGCTCTGGGTCCATAAGCTTTTCTTTACATTGAATTCATCGTGTGTGTTTGATACAGGTGTTTGGAATGGAACTCGTTGGCTGCTTATTTTCTAGAAACTGGAATGTGAGAGAGATGGCCCTCAGGCGTCTTTCCCATGATGTCAGTGGGGCCCTGCTGTTGGCAAATGGGGAGAGCACTGGAAATT
MAP3K1	5	56170859	56171058	MAP3K1_25	200	56	GTGTTTGGAATGGAACTCGTTGG	CCTGAGATACTGGTCTGGGAAGA	GTGTTTGGAATGGAACTCGTTGGCTGCTTATTTTCTAGAAACTGGAATGTGAGAGAGATGGCCCTCAGGCGTCTTTCCCATGATGTCAGTGGGGCCCTGCTGTTGGCAAATGGGGAGAGCACTGGAAATTCTGGGGGCAGCAGTGGAAGCAGCCCGAGTGGGGGAGCCACCAGTGGGTCTTCCCAGACCAGTATCTCAGG
MAP3K1	5	56170999	56171191	MAP3K1_26	193	50	CAGTGGAAGCAGCCCGAG	CCATCAAAAAACCCCAAACCCAT	CAGTGGAAGCAGCCCGAGTGGGGGAGCCACCAGTGGGTCTTCCCAGACCAGTATCTCAGGAGATGTGGTGGAGGCATGCTGCAGCGTTCTGTCAATGGTCTGTGCTGACCCTGTCTACAAAGTGTACGTTGCTGCTTTAGTAAGTAGCTTTATTCCATAATCATATCATTATGGGTTTGGGGTTTTTTGATGG
MAP3K1	5	56174745	56174924	MAP3K1_27	180	41	aggccaTTATCTCTGATGCTTTT	TGGCATCTGCACATTTGACTAGG	aggccaTTATCTCTGATGCTTTTTAAGTGTACATAAACTGACCTTCAGATTTTTTTCCTTAGAAAACATTGAGAGCCATGCTGGTATATACTCCTTGCCACAGTTTAGCGGAAAGAATCAAACTTCAGAGACTTCTCCAGCCAGTTGTAGACACCATCCTAGTCAAATGTGCAGATGCCA
MAP3K1	5	56174804	56174983	MAP3K1_28	180	42	TAGAAAACATTGAGAGCCATGCTG	TGCGAGGCACTTTTAAGACAAGA	TAGAAAACATTGAGAGCCATGCTGGTATATACTCCTTGCCACAGTTTAGCGGAAAGAATCAAACTTCAGAGACTTCTCCAGCCAGTTGTAGACACCATCCTAGTCAAATGTGCAGATGCCAATAGGTAAGGCTTTATTGATGAATCACTTCAAACCCTCTTGTCTTAAAAGTGCCTCGCA
MAP3K1	5	56176504	56176689	MAP3K1_29	186	41	TCCAGGATTGATGTTGCTTTTCC	CAAGGCTGCTCAGGAACATGATA	TCCAGGATTGATGTTGCTTTTCCTTTGTTTTTAGCCGCACAAGTCAGCTGTCCATATCAACACTGTTGGAACTGTGCAAAGGCCAAGCAGGAGAGTTGGCAGTTGGCAGAGAAATACTAAAAGCTGGTAATAACTTTTCACTTAAAAGGAATATAGCATATTTTATCATGTTCCTGAGCAGCCTTG
MAP3K1	5	56176822	56177015	MAP3K1_30	194	31	TGTTGGCCTTACACCATTTAATCA	TCTATAAGACAAAGGCGGCCAAG	TGTTGGCCTTACACCATTTAATCATGTCTTGTTTTAGATTTTAATATCACTATTTTTTAATCATTTATTTTTACTTTCCTTTTTGTAGGATCCATTGGTATTGGTGGTGTTGATTATGTCTTAAATTGTATTCTTGGAAACCAAACTGAATCAAACAATTGGCAAGAACTTCTTGGCCGCCTTTGTCTTATAGA
MAP3K1	5	56176956	56177147	MAP3K1_31	192	38	TGGAAACCAAACTGAATCAAACAA	AGGGAGGGTAGGAAGATACAAGT	TGGAAACCAAACTGAATCAAACAATTGGCAAGAACTTCTTGGCCGCCTTTGTCTTATAGATAGACTGTTGTTGGAATTTCCTGCTGAATTTTATCCTCATATTGTCAGTACTGATGTTTCACAAGCTGAGCCTGTTGAAATCAGGTAATTTTTCTTCTGAAAATGTATTACTTGTATCTTCCTACCCTCCCT
MAP3K1	5	56177279	56177467	MAP3K1_32	189	33	ACTTTATGCTGAAATGGTTTTTGAAGT	TGCCAACCATTGAGTGGGAATTA	ACTTTATGCTGAAATGGTTTTTGAAGTATACATGCTGTAAATTACTACCATTTTTTAAGTTTCCATGTATTTTTCAGTAATTGGAACTTATATGGTAATGAATGTTTTTTTCTTTCAGGTATAAGAAGCTGCTGTCCCTCTTAACCTTTGCTTTGCAGTCCATTGATAATTCCCACTCAATGGTTGGCA
MAP3K1	5	56177414	56177611	MAP3K1_33	198	44	CCCTCTTAACCTTTGCTTTGCAG	CATCTGCAATAGCCATCAAACGG	CCCTCTTAACCTTTGCTTTGCAGTCCATTGATAATTCCCACTCAATGGTTGGCAAACTTTCCAGAAGGATCTACTTGAGTTCTGCAAGAATGGTTACTACAGTACCCCATGTGTTTTCAAAACTGTTAGAAATGCTGAGTGTTTCCAGTTCCACTCACTTCACCAGGATGCGTCGCCGTTTGATGGCTATTGCAGATG
MAP3K1	5	56177509	56177697	MAP3K1_34	189	49	ACTACAGTACCCCATGTGTTTTCA	GGGAACAGATGCCTGCAAGA	ACTACAGTACCCCATGTGTTTTCAAAACTGTTAGAAATGCTGAGTGTTTCCAGTTCCACTCACTTCACCAGGATGCGTCGCCGTTTGATGGCTATTGCAGATGAGGTGGAAATTGCCGAAGCCATCCAGTTGGGCGTAGAAGACACTTTGGATGGTCAACAGGACAGCTTCTTGCAGGCATCTGTTCCC
MAP3K1	5	56177598	56177796	MAP3K1_35	199	47	GGCTATTGCAGATGAGGTGGAAA	ACTGGCACTCAATTTTGTAGCAC	GGCTATTGCAGATGAGGTGGAAATTGCCGAAGCCATCCAGTTGGGCGTAGAAGACACTTTGGATGGTCAACAGGACAGCTTCTTGCAGGCATCTGTTCCCAACAACTATCTGGAAACCACAGAGAACAGTTCCCCTGAGTGCACAGTCCATTTAGAGAAAACTGGAAAAGGATTATGTGCTACAAAATTGAGTGCCAGT
MAP3K1	5	56177716	56177912	MAP3K1_36	197	43	ACAGAGAACAGTTCCCCTGAGT	GGTCTGCCTTTTGTTTGAACCATT	ACAGAGAACAGTTCCCCTGAGTGCACAGTCCATTTAGAGAAAACTGGAAAAGGATTATGTGCTACAAAATTGAGTGCCAGTTCAGAGGACATTTCTGAGAGACTGGCCAGCATTTCAGTAGGACCTTCTAGTTcaacaacaacaacaacaacaacaacaGAGCAACCAAAGCCAATGGTTCAAACAAAAGGCAGACC
MAP3K1	5	56177774	56177972	MAP3K1_37	199	43	GTGCTACAAAATTGAGTGCCAGTT	GCTGGAAACATTAATTGGGAATGATGA	GTGCTACAAAATTGAGTGCCAGTTCAGAGGACATTTCTGAGAGACTGGCCAGCATTTCAGTAGGACCTTCTAGTTcaacaacaacaacaacaacaacaacaGAGCAACCAAAGCCAATGGTTCAAACAAAAGGCAGACCCCACAGTCAGTGTTTGAACTCCTCTCCTTTATCTCATCATTCCCAATTAATGTTTCCAGC
MAP3K1	5	56177911	56178106	MAP3K1_38	196	46	CCCCACAGTCAGTGTTTGAACT	GAGAAAACTTGCGCTGTGTTTGA	CCCCACAGTCAGTGTTTGAACTCCTCTCCTTTATCTCATCATTCCCAATTAATGTTTCCAGCCTTGTCAACCCCTTCTTCTTCTACCCCATCTGTACCAGCTGGCACTGCAACAGATGTCTCTAAGCATAGACTTCAGGGATTCATTCCCTGCAGAATACCTTCTGCATCTCCTCAAACACAGCGCAAGTTTTCTC
MAP3K1	5	56178008	56178203	MAP3K1_39	196	45	CAGCTGGCACTGCAACAGAT	CTGTGTATGTTACTGGAGGGCAA	CAGCTGGCACTGCAACAGATGTCTCTAAGCATAGACTTCAGGGATTCATTCCCTGCAGAATACCTTCTGCATCTCCTCAAACACAGCGCAAGTTTTCTCTACAATTCCACAGAAACTGTCCTGAAAACAAAGACTCAGATAAACTTTCCCCAGTCTTTACTCAGTCAAGACCCTTGCCCTCCAGTAACATACACAG
MAP3K1	5	56178121	56178318	MAP3K1_40	198	43	AACTGTCCTGAAAACAAAGACTCA	ACAGCCAAAGCTGTCATCACATT	AACTGTCCTGAAAACAAAGACTCAGATAAACTTTCCCCAGTCTTTACTCAGTCAAGACCCTTGCCCTCCAGTAACATACACAGGCCAAAGCCATCTAGACCTACCCCAGGTAATACAAGTAAACAGGGAGATCCCTCAAAAAATAGCATGACACTTGATCTGAACAGTAGTTCCAAATGTGATGACAGCTTTGGCTGT
MAP3K1	5	56178225	56178420	MAP3K1_41	196	43	CCCAGGTAATACAAGTAAACAGGGA	ACTGGAGTTGAGCTCTGTATTGA	CCCAGGTAATACAAGTAAACAGGGAGATCCCTCAAAAAATAGCATGACACTTGATCTGAACAGTAGTTCCAAATGTGATGACAGCTTTGGCTGTAGCAGCAATAGTAGTAATGCTGTTATACCCAGTGACGAGACAGTGTTCACCCCAGTAGAGGAGAAATGCAGATTAGATGTCAATACAGAGCTCAACTCCAGT
MAP3K1	5	56178334	56178515	MAP3K1_42	182	42	AATGCTGTTATACCCAGTGACGA	TTTTCAGCCTTTTCAGGAGACAG	AATGCTGTTATACCCAGTGACGAGACAGTGTTCACCCCAGTAGAGGAGAAATGCAGATTAGATGTCAATACAGAGCTCAACTCCAGTATTGAGGACCTTCTTGAAGCATCTATGCCTTCAAGTGATACAACAGTAACTTTTAAGTCAGAAGTTGCTGTCCTGTCTCCTGAAAAGGCTGAAAA
MAP3K1	5	56178442	56178630	MAP3K1_43	189	40	TCTATGCCTTCAAGTGATACAACA	GGCATCCTGAGACGCTGAC	TCTATGCCTTCAAGTGATACAACAGTAACTTTTAAGTCAGAAGTTGCTGTCCTGTCTCCTGAAAAGGCTGAAAATGATGATACCTACAAAGATGATGTGAATCATAATCAAAAGTGCAAAGAGAAGATGGAAGCTGAAGAAGAAGAAGCTTTAGCAATTGCCATGGCAATGTCAGCGTCTCAGGATGCC
MAP3K1	5	56178556	56178739	MAP3K1_44	184	43	TGCAAAGAGAAGATGGAAGCTGA	ccagccCCAAGGAAGTTTTCTAA	TGCAAAGAGAAGATGGAAGCTGAAGAAGAAGAAGCTTTAGCAATTGCCATGGCAATGTCAGCGTCTCAGGATGCCCTCCCCATAGTTCCTCAGCTGCAGGTTGAAAATGGAGAAGATATCATCATTATTCAACAGGATGTAAGTATAGATTCTTTAAGAGGTTAGAAAACTTCCTTGGggctgg
MAP3K1	5	56179253	56179452	MAP3K1_45	200	38	GGTTTGGGAAGCCAGACTGAATA	AGAAAATGCTCCAAGGCCTATCT	GGTTTGGGAAGCCAGACTGAATAAGAATAATATCTTGCAGACTAATTTCACAAAATCTTACTCCTTTAACAGTAAAAAGATTGCTTTCGTTTAATATGTAGACACCAGAGACTCTACCAGGACATACCAAAGCAAAACAACCGTATAGAGAAGACACTGAATGGCTGAAAGGTCAACAGATAGGCCTTGGAGCATTTTCT
MAP3K1	5	56179379	56179559	MAP3K1_46	181	38	CCAAAGCAAAACAACCGTATAGAGAA	TGCTTCATTTTGTGATTTGAGTCATT	CCAAAGCAAAACAACCGTATAGAGAAGACACTGAATGGCTGAAAGGTCAACAGATAGGCCTTGGAGCATTTTCTTCTTGTTATCAGGCTCAAGATGTGGGAACTGGAACTTTAATGGCTGTTAAACAGGTAAATATCTAGTGAGCATATAAATGAAATGACTCAAATCACAAAATGAAGCA
MAP3K1	5	56180434	56180621	MAP3K1_47	188	38	AGATCAGATTGCTAGTGAAAATATGC	CTCTTCTCACACGTGGCTCC	AGATCAGATTGCTAGTGAAAATATGCAAAACTTTGTGAACGTGTTTATTTGAAACAGGTGACTTATGTCAGAAACACATCTTCTGAGCAAGAAGAAGTAGTAGAAGCACTAAGAGAAGAGATAAGAATGATGAGCCATCTGAATCATCCAAACATCATTAGGATGTTGGGAGCCACGTGTGAGAAGAG
MAP3K1	5	56180519	56180710	MAP3K1_48	192	36	AGCAAGAAGAAGTAGTAGAAGCACT	AATTGCAGAAAGTTAAATCCACGTA	AGCAAGAAGAAGTAGTAGAAGCACTAAGAGAAGAGATAAGAATGATGAGCCATCTGAATCATCCAAACATCATTAGGATGTTGGGAGCCACGTGTGAGAAGAGCAATTACAATCTCTTCATTGAATGGATGGCAGGTATGTTAATGTTTTAAATTACAAAATAGTAGTACGTGGATTTAACTTTCTGCAATT
MAP3K1	5	56181670	56181855	MAP3K1_49	186	34	TCATGCAGTGAAAACTTTAGAAACCA	AGATACGAAAGGCCACGGAGTAA	TCATGCAGTGAAAACTTTAGAAACCAAAGTGTAATAAATACTTTTAATTCTGTCTTAAGTTTATGATAATTATTTCTATTGTCTTATAGGGGGATCGGTGGCTCATTTGCTGAGTAAATATGGAGCCTTCAAAGAATCAGTAGTTATTAACTACACTGAACAGTTACTCCGTGGCCTTTCGTATCT
MAP3K1	5	56181776	56181960	MAP3K1_50	185	35	TTGCTGAGTAAATATGGAGCCTT	CTGTGCCTGGCCCCAA	TTGCTGAGTAAATATGGAGCCTTCAAAGAATCAGTAGTTATTAACTACACTGAACAGTTACTCCGTGGCCTTTCGTATCTCCATGAAAACCAAATCATTCACAGAGATGTCAAAGGTGAGAATTCTTCTAATTATTATCTAGTGACaataaaaaaattaattttaaaatttGGggccaggcacag
MAP3K1	5	56183177	56183376	MAP3K1_51	200	46	CAAGGTCATTTGCTGTGTTTGTT	CTGTCATCACACTCAAAGATGCT	CAAGGTCATTTGCTGTGTTTGTTGACAGGTGCCAATTTGCTAATTGACAGCACTGGTCAGAGACTAAGAATTGCAGATTTTGGAGCTGCAGCCAGGTTGGCATCAAAAGGAACTGGTGCAGGAGAGTTTCAGGGACAATTACTGGGGACAATTGCATTTATGGCACCTGAGGTGAGAAGCATCTTTGAGTGTGATGACAG
MAP3K1	5	56183988	56184168	MAP3K1_52	181	38	ACTACAAAATGGCCTTCTCTTTTTCA	AGATGATTGGAGTGTTTTTCTGC	ACTACAAAATGGCCTTCTCTTTTTCAAATGAGTCCTATTTCCAAATTAACTCTGATTTATTTTAGGTACTAAGAGGTCAACAGTATGGAAGGAGCTGTGATGTATGGAGTGTTGGCTGTGCTATTATAGAAATGGCTTGTGCAAAACCACCATGGAATGCAGAAAAACACTCCAATCATCT
MAP3K1	5	56184063	56184259	MAP3K1_53	197	38	GTCAACAGTATGGAAGGAGCTGT	CATCAAAATTTGCCTCCTGCCAA	GTCAACAGTATGGAAGGAGCTGTGATGTATGGAGTGTTGGCTGTGCTATTATAGAAATGGCTTGTGCAAAACCACCATGGAATGCAGAAAAACACTCCAATCATCTTGCTTTGATATTTAAGGTAATTGTGAGATAAAAATTACTTCTTTGTGCTAAAAGGAGTACAGCAGAATTTGGCAGGAGGCAAATTTTGATG
MAP3K1	5	56189271	56189469	MAP3K1_54	199	44	TGTAAGGGTTATGAGGTCTATGCAC	CTCTTGATGGAGGTCTGTCCTGA	TGTAAGGGTTATGAGGTCTATGCACATGTGTTTCTGTATCAGAAGTTACAGTTGTGCAAAGCTTCAACACTGGCTTTTTCTCCACAGATTGCTAGTGCAACTACTGCTCCATCGATCCCTTCACATTTGTCTCCTGGTTTACGAGATGTGGCTCTTCGTTGTTTAGAACTTCAACCTCAGGACAGACCTCCATCAAGAG
MAP3K1	5	56189383	56189582	MAP3K1_55	200	44	CGATCCCTTCACATTTGTCTCCT	TCAATGTGGTTCCCCACAAGTTT	CGATCCCTTCACATTTGTCTCCTGGTTTACGAGATGTGGCTCTTCGTTGTTTAGAACTTCAACCTCAGGACAGACCTCCATCAAGAGAGCTACTGAAGCATCCAGTCTTTCGTACTACATGGTAGCCAATTATGCAGATCAACTACAGTAGAAACAGGATGCTCAACAAGAGAAAAAAAACTTGTGGGGAACCACATTGA
PDE4D	5	58270424	58270604	PDE4D_1	181	41	TGTGACATGCACTTTGGAAACAA	TCAGAGTCTACTGAAATTCCCCTT	TGTGACATGCACTTTGGAAACAATTTTTCTACTTAAAAAAAAAAAAGGCATGAAAGTTTTTGCACTGTTACGTGTCAGGAGAACGATCATCTATGACACAGGCTTCAGGCTGGCTTTCCTCTTCTTCCCCTACTGCCTCCTCTTCAACCTGTTCATCAAGGGGAATTTCAGTAGACTCTGA
PDE4D	5	58270553	58270742	PDE4D_2	190	46	CTACTGCCTCCTCTTCAACCTGT	CGGCAGGGTCAAACTGAGAAAT	CTACTGCCTCCTCTTCAACCTGTTCATCAAGGGGAATTTCAGTAGACTCTGAGTCTTGAGTACAAAGAGTCTTGGAGTCACTGCAGCTAGTGTCTTCTTCCACTTGACTGCCACTGTCCTTTTCCGTGTCTGACTCACCATCTTCCTCTAAAGTTAGTTCAAACTGGAATTTCTCAGTTTGACCCTGCCG
PDE4D	5	58270654	58270849	PDE4D_3	196	52	ACTTGACTGCCACTGTCCTTTTC	ACCCTGACGCCCAGGATATT	ACTTGACTGCCACTGTCCTTTTCCGTGTCTGACTCACCATCTTCCTCTAAAGTTAGTTCAAACTGGAATTTCTCAGTTTGACCCTGCCGGCCCTCCTCTGGGTCATCAGGTGCAGGAGAGGGGCTCTGAGGGATTGTGCTCTGGTACCATTCACGATTGTCCTCCAAAGTGTCCAAAATATCCTGGGCGTCAGGGT
PDE4D	5	58270777	58270958	PDE4D_4	182	47	CTCTGAGGGATTGTGCTCTGGTA	TGTTTCTTAGTCCCAAGTCCTCT	CTCTGAGGGATTGTGCTCTGGTACCATTCACGATTGTCCTCCAAAGTGTCCAAAATATCCTGGGCGTCAGGGTGGACGAGGTCTGCCCATGTCTCCCAGAGGGGATGAACAATATAGTCTATGAAGCCCACCTAGTTAAGAAAAAAATCCAGTATGAGTAGAGGACTTGGGACTAAGAAACA
PDE4D	5	58271431	58271630	PDE4D_5	200	51	ATGCTAAAGCGGTAGCTCTGTTC	AACCCAACAAAGCCTCTCCAG	ATGCTAAAGCGGTAGCTCTGTTCTCTCTGAAAGCTATACACTTCATGCATTACCTGTGATTTTTCCACGGAAGCATTGTGCTTGTCACACATGGGGCTTATCTCCATGCCACGTTCCCTCTCTCGGTCTCCTTGGCGGAAGAACTCCTCCATTATCCGGTCCGTCCACTGGCGGTACAGCTGGAGAGGCTTTGTTGGGTT
PDE4D	5	58271566	58271765	PDE4D_6	200	41	CGGAAGAACTCCTCCATTATCCG	AAGTGTTGCAGTCATCCAATGTG	CGGAAGAACTCCTCCATTATCCGGTCCGTCCACTGGCGGTACAGCTGGAGAGGCTTTGTTGGGTTGCTCAGATCTGCACAGTGCACCATATTCTGAAGAACCTAAAATAGATGGATGCATTCTCTATTCACTCCTGTTCCttttttttaaaaaaaaaaacaaaaaaaaCTAGAAATTCACATTGGATGACTGCAACACTT
PDE4D	5	58272074	58272264	PDE4D_7	191	41	AGGTGGGAGAAGGAAGAAATACA	ACTGGCTGATTTGAAGACTATGG	AGGTGGGAGAAGGAAGAAATACATCTTATCAAAGCTGAACACGCAGACATGTGCACATGTGCACAGACACACACACACAGAGCAAACTCAAACAAGGCTTTACCTGAATCCTATCGGAATAATTATCAAGAAGAAGAACTCCAGAGCTTGTCACTTTCTTAGTTTCAACCATAGTCTTCAAATCAGCCAGT
PDE4D	5	58272154	58272352	PDE4D_8	199	33	AGCAAACTCAAACAAGGCTTTACC	TCATGTGTAAATTCTGTTTTCTCTGAACT	AGCAAACTCAAACAAGGCTTTACCTGAATCCTATCGGAATAATTATCAAGAAGAAGAACTCCAGAGCTTGTCACTTTCTTAGTTTCAACCATAGTCTTCAAATCAGCCAGTAGATTCATGTGTTTTGACATATCTGTTGCAAGTACCTTAAAATATAGAGTATATTATTAAGTTCAGAGAAAACAGAATTTACACATGA
PDE4D	5	58272921	58273119	PDE4D_9	199	34	TGCAGTTCCTTTTACCTAATACTCA	TTGGCTGTGGGCTTTAAATTGC	TGCAGTTCCTTTTACCTAATACTCATCTTGTTCTTATGTCTAAATTATAAACAACTTGCATCACAGTTCTCTTCTTTGGCTTTTATCAGCTACTTACGATGTCAATGACCATTTTCCTTAAAGATTGTCTTTGTTTTTTGGTCAAATTCTGGAAAATGTCACAGTTTTCTTCCTGAAGCAATTTAAAGCCCACAGCCAA
PDE4D	5	58273016	58273210	PDE4D_10	195	37	ACGATGTCAATGACCATTTTCCTTA	CAGTTTTGCTGATCTTTGGCCTT	ACGATGTCAATGACCATTTTCCTTAAAGATTGTCTTTGTTTTTTGGTCAAATTCTGGAAAATGTCACAGTTTTCTTCCTGAAGCAATTTAAAGCCCACAGCCAAATGATGGTTCTCTAAGACTGAGGAATCATTGTACATCAAGGCAAGTTCAGAGTCTGTAAAAAAGACAAAAGGCCAAAGATCAGCAAAACTG
PDE4D	5	58284267	58284446	PDE4D_11	180	32	ATTCTAAAATGTACAAGGGAAAAATGTGTTCT	TATTATCTATATTGTCTGATTTTCCAGGCTGTGTT	ATTCTAAAATGTACAAGGGAAAAATGTGTTCTGAAAAAATAAAGTTTACTTACTTGTATTGATCAGAAATTGATTGGACACACCAGGATGATCTACATCATGTATTGCACTGGCAAAAATTGCTGCAAGAATCTCCAAATCTGTAAACACAGCCTGGAAAATCAGACAATATAGATAATA
PDE4D	5	58284379	58284566	PDE4D_12	188	29	GCAAAAATTGCTGCAAGAATCTCC	ATCTAAGACTCTCCCTTGACACA	GCAAAAATTGCTGCAAGAATCTCCAAATCTGTAAACACAGCCTGGAAAATCAGACAATATAGATAATATTACTATTCTACAATGATATGAATTAAAAGTATAAACAAATAAGAAATCTCTAGAATTTAAATGGAAAACAAAATGAAGCTTCAAAATGTGTTACAATGTGTCAAGGGAGAGTCTTAGAT
PDE4D	5	58285492	58285686	PDE4D_13	195	39	TCTTCTCCATTGAAAACCCTTCAG	ACTCTCGAAGACCATTACCATGC	TCTTCTCCATTGAAAACCCTTCAGATAAAAGTTTAATAGACCTTTATGAGTGGCAAGTTAGTGTTCTTGAAATTTCAGAAACAGATTTACCTCCAAAGCAGGTGTAGATAATAGCACATGAGTAGACTGGACAACATCTGCAGCATGGATATTGTTGTGATAGGCCACATCAGCATGGTAATGGTCTTCGAGAGT
PDE4D	5	58285603	58285792	PDE4D_14	190	33	TAGCACATGAGTAGACTGGACAA	TTTTCACATAAAGACAAAAATGTTAAGATGA	TAGCACATGAGTAGACTGGACAACATCTGCAGCATGGATATTGTTGTGATAGGCCACATCAGCATGGTAATGGTCTTCGAGAGTCATAAGATATGTAATTAAAGTATCTACTGGAATTTTAAATGTTTTTAATAAATCCCGTTCCTGTAGGAAAAAAAATCATCTTAACATTTTTGTCTTTATGTGAAAA
PDE4D	5	58286562	58286741	PDE4D_15	180	38	ATGCATAAGCTACAGACTGGACA	TTTTCACTCCAGGAACTAGAAGATGTG	ATGCATAAGCTACAGACTGGACATTAAGTTCCTAAATAAAATAAATGTAATAGAACTCAACCACCTTACCTGAAAAATGGTGTGCATGATAACAGTCAAGGGCCGGTTACCAGACAACTCTGCTATTCTGAAAACATGAAGACCCCATTTGTTCACATCTTCTAGTTCCTGGAGTGAAAA
PDE4D	5	58286641	58286825	PDE4D_16	185	35	GTGTGCATGATAACAGTCAAGGG	ACCTAAGGTCTGTAATTTTTAAATGATTGTG	GTGTGCATGATAACAGTCAAGGGCCGGTTACCAGACAACTCTGCTATTCTGAAAACATGAAGACCCCATTTGTTCACATCTTCTAGTTCCTGGAGTGAAAAAAAAAAAAAGATACTAAAATATTAGAAAGTGGAGTAAAATATGACTCAATGAACACAATCATTTAAAAATTACAGACCTTAGGT
PDE4D	5	58287553	58287751	PDE4D_17	199	34	AAACCCCAATTAATAAACTTTTCTATCCA	GGAGTCAAGAAATTGATGCACAGC	AAACCCCAATTAATAAACTTTTCTATCCATTTAAAAGACTAGAAGTGAAAATTCATGAAAGGGCATCATTTAATATTTATGATCCTGATCTTTGAAATCATCATACCTTGGCAAGGACATCTTCTTGTTCAGTTTTAACTCCAAACCTTGGGATACTTGAATTAGTCAGACTAGAGCTGTGCATCAATTTCTTGACTCC
PDE4D	5	58287689	58287838	PDE4D_18	150	39	AACTCCAAACCTTGGGATACTTG	TCTCAAGATAAGCAACATGAAGTGGA	AACTCCAAACCTTGGGATACTTGAATTAGTCAGACTAGAGCTGTGCATCAATTTCTTGACTCCACTGATCTGAGACATTGGTCTTTTCTTTTTCTCCTTTTCCTTCTGAGTTGGAGAAGGAATTTCCACTTCATGTTGCTTATCTTGAGA
PDE4D	5	58287806	58287986	PDE4D_19	181	25	AGGAATTTCCACTTCATGTTGCT	TCAAATGTAAATACTGAACTCTCTAAAAGG	AGGAATTTCCACTTCATGTTGCTTATCTTGAGAAATTTAGAAAATGTTCTATATTTATTATTAATTCTATCTGTTTTATATCATATGCATAATTGGAAGGATTATAATTGATCATTATATATTCCAGGAAATGTTTCCAACTAAAAAGTTTCCTTTTAGAGAGTTCAGTATTTACATTTGA
PDE4D	5	58289112	58289291	PDE4D_20	180	37	AAAATGAGTTGGCACCCCAATCC	TTAAAAGGATGCTTAATCGGGAGC	AAAATGAGTTGGCACCCCAATCCTCCTACAAAAACAAACAAGCAAACAACTGAAGAAAAAAATTTAATTGCATGTTGTTATTCTCACCTAAGAATGTGTTTGATATAAACTCTGACACTTGATTTCCAGACCGACTCATTTCAGAGAGATGGGTGAGCTCCCGATTAAGCATCCTTTTAA
PDE4D	5	58289223	58289403	PDE4D_21	181	34	CTGACACTTGATTTCCAGACCGA	AGGACAACTTAAAAATTCTTTGGGCATA	CTGACACTTGATTTCCAGACCGACTCATTTCAGAGAGATGGGTGAGCTCCCGATTAAGCATCCTTTTAAACTGAAAAACAGAAAAGTAAAATGAAATAATAGAAGAGGAAAATTTAAGTGAAATATATATGCATACTCTGAGATACAGGAAGATATGCCCAAAGAATTTTTAAGTTGTCCT
PDE4D	5	58295282	58295466	PDE4D_22	185	31	AGTAAGGAGTTTTCAAAAGCTAAGTAAGT	TGGCTTGTGGAGGTTGTTAAAGT	AGTAAGGAGTTTTCAAAAGCTAAGTAAGTCTTACCTTTATGTAGCCCCAAGACACTGACAGTAAATAGTTTGCTTCAGGCATTTTTGATTGATtatatgtatatatatatatatgtatatatataGTAAGCTCTAAAATGTATTTAGCTTCAAAATCTCGACACTTTAACAACCTCCACAAGCCA
PDE4D	5	58334601	58334800	PDE4D_23	200	62	TTTCCCGGGGCTATGGGTA	AGAGGAGGCCTACCAGAAACT	TTTCCCGGGGCTATGGGTACCAGTGGCTCGCCGGCATGGGAATCAGCAGCCTGGGGGCACCAGTGACAGCAGAACCGGGGCTTACCTTGTTGGAGGCCATCTCACTGACGGAGTGCCTGGTCTGTAGGGTCTCTAGCTGGTCCAGACACCAGTCCAGCTCCTCCAGGGTCTCGCTGGCCAGTTTCTGGTAGGCCTCCTCT
PDE4D	5	58334681	58334871	PDE4D_24	191	60	CTTACCTTGTTGGAGGCCATCTC	GCCCCCTTTGAACTCGCTA	CTTACCTTGTTGGAGGCCATCTCACTGACGGAGTGCCTGGTCTGTAGGGTCTCTAGCTGGTCCAGACACCAGTCCAGCTCCTCCAGGGTCTCGCTGGCCAGTTTCTGGTAGGCCTCCTCTGCGAAGAGACAGGGAAAGGGGGACTCAGTTCTCAAGCGCTTCACGGGTCCGCTAGCGAGTTCAAAGGGGGC
PDE4D	5	58334779	58334978	PDE4D_25	200	64	CAGTTTCTGGTAGGCCTCCTCT	GCGAGCACAGCCTCCG	CAGTTTCTGGTAGGCCTCCTCTGCGAAGAGACAGGGAAAGGGGGACTCAGTTCTCAAGCGCTTCACGGGTCCGCTAGCGAGTTCAAAGGGGGCCATCCTGCCATACCCCGCCATGCTCGGATGCCCGGTGCCGGCACATGAGGGCTGCTCCTTCATATTGCCCAGCCCGGCAGTGCAACGGGGGCGGAGGCTGTGCTCGC
PDE4D	5	58476330	58476512	PDE4D_26	183	41	CAGCATGAAATTGGTGTTGGTGT	GCCCCACATATTTACTGCTTTGTG	CAGCATGAAATTGGTGTTGGTGTTATATTGACTCTTGGCAGAAATGGTTTCTTCCTAGACACATGAAGAATAAGCTCCAGATCTTTCTTACCTGTTATGGTGGCTTTGTTGATGGATGGTTGGTTGCACATGGGTGATCTTCTGACAAAGACAGAAAAACACAAAGCAGTAAATATGTGGGGC
PDE4D	5	58480941	58481135	PDE4D_27	195	39	CTTGGGCTCAATCAAGTTGAGAA	AAAATGGCCTTAGCTCAAGAAGT	CTTGGGCTCAATCAAGTTGAGAAAACTTATTTAAAAGTTCAGCAAAAAAGAGGGGGGAAAAAAGGATATCTTACTTGCTAGGTGCTCGATCTTGCAAATTAGTTAATGCAGCAAAGTTGTTTCGTACAGTTCGCagactggccaagacctacaacaagaaaggattcttgaaacttcttgagctaaggccatttt
PDE4D	5	58489252	58489450	PDE4D_28	199	39	ataaCCCGAACTAATTCCCCAAA	TGAAAGTGGAACTTGCCGTTTAAT	ataaCCCGAACTAATTCCCCAAATTAAATTTTTACATCTGTGAGAAACCTGCCCATTCACCAAGCTGTGCTTACCTGAGCAAATGGAGTCACAATCAAGTCATCTCCGTGTCTGAAAAATAAACCAAATCCCGCATTAGAAATCATCAATAACTCTGTGCTCAGTGTCGTTCAATATTAAACGGCAAGTTCCACTTTCA
PDE4D	5	58511523	58511722	PDE4D_29	200	43	AGTCATTAGTTTTATTATGTCATCAGCTCT	AATTCTCCAAGCAAATTTTGTCCA	AGTCATTAGTTTTATTATGTCATCAGCTCTAGATATAAATTTACTCGGTTTTCTCTCTCTTTGCCTGCCCTTGTACTTACATATCACTGGCAATGGAGGAGTTCCGGGACATAGACTTTGGAGAGAGGTCATAATCGCTGTCGGATCGATACAGGAAGGACTCCCGTCGTTGACTGTGGACAAAATTTGCTTGGAGAATT
PDE4D	5	58511646	58511829	PDE4D_30	184	50	AGAGGTCATAATCGCTGTCGGAT	TCACAGCAACATAATTCCTTCTCC	AGAGGTCATAATCGCTGTCGGATCGATACAGGAAGGACTCCCGTCGTTGACTGTGGACAAAATTTGCTTGGAGAATTAGCCCGGATCCTGGGCTGGTCATGGGATCCAAGGGACTCCGTCCCGCAGATGTGCCATTGTCCACATCAAAACTGTAAAGGAAGGAGAAGGAATTATGTTGCTGTGA
PDE4D	5	58571073	58571272	PDE4D_31	200	37	AGCCTCGACATCACACAACTTAC	TCAGAATAGTTGAAGACTTATTTTCCTTTT	AGCCTCGACATCACACAACTTACTAAATACTCAAGGAGTACGTCAATCTTAAAAGAGAAAAGGGGAAAAGCATGAGAGAAAAGAACGTTACCAAACTGCCTCTGCAGTCCTTAGGGAACTTGTAGATCGGGATCTTGGCTTCATAATAATGCTCATTTTGAAAAAAAATAAAAAGGAAAATAAGTCTTCAACTATTCTGA
PDE4D	5	58652510	58652703	PDE4D_32	194	46	GGCAAAGGCTTATTTGCAAGGG	GTTCCTGGGGATCTTGGCATC	GGCAAAGGCTTATTTGCAAGGGGCCTAAGGCAGTTAAACAATTCTTCCTAGCTACAAAAGGAAAAGAGTAATACCTGTAGGACTTTGAGAAACGCAATCTTGATTTGGCTCTTGTAGATGGTCCTGGCACCGTGGCTCCCAGAGGATCCCAAACAAAAGCCATTTTTAAGGACGATGCCAAGATCCCCAGGAAC
PDE4D	5	58882071	58882252	PDE4D_33	182	36	TTCAAGACAAATCCTCATCTGGT	ACATGTAACGTAGGAGACAAGAAA	TTCAAGACAAATCCTCATCTGGTACCTGTCACGGAATTTGATAATTCTGAGTTTTACAAACTGAAGGGAATATTGATTACTCACCATATCCAGGAATGCCTTCTAAAGGGAAAATTATTCACGTGCATCATGTTCGCAGATCTTCTGTCATTAATATTTTTCTTGTCTCCTACGTTACATGT
PDE4D	5	59063984	59064183	PDE4D_34	200	56	CCCTCCCTACCCCCAAAATTAAAG	TCCCAAGCTCTCTCCAGTGAT	CCCTCCCTACCCCCAAAATTAAAGGCGCGAGAGCAGGACTCCCTGAAGGGAAACGGCCACCATTTCTGCGAGGTCTGCGCAAACCTTACCATGTATGTGCCACCGTGAAACGCCGCTGTTTGGGGATGTTGCTGCTGAGAAGCATTCTGCGCAGAAGCCTGGGGGAATTTCTCGGAGAGATCACTGGAGAGAGCTTGGGA
PDE4D	5	59064099	59064289	PDE4D_35	191	51	CTGTTTGGGGATGTTGCTGCT	ATAATCCGCATTGTCCAAACCC	CTGTTTGGGGATGTTGCTGCTGAGAAGCATTCTGCGCAGAAGCCTGGGGGAATTTCTCGGAGAGATCACTGGAGAGAGCTTGGGAGAAACCGATTTCCTCGCTGTCTTGGACTTCTCATGCTGCAACAGGTTTTCTCGCAAGGATTTCACAAGGTCTTCGTTCAGCCACGGGTTTGGACAATGCGGATTAT
PDE4D	5	59064185	59064366	PDE4D_36	182	48	AAACCGATTTCCTCGCTGTCTTG	TCTTGCCAGCTGTACAAAGTTGA	AAACCGATTTCCTCGCTGTCTTGGACTTCTCATGCTGCAACAGGTTTTCTCGCAAGGATTTCACAAGGTCTTCGTTCAGCCACGGGTTTGGACAATGCGGATTATCCACTTCAGGTACTGTTAAAGTGTCCGGGCTTGTCTGCTGAGCCATTTTCCTGGTCAACTTTGTACAGCTGGCAAGA
PDE4D	5	59188917	59189113	PDE4D_37	197	63	AGCCGACTTAGATGGAGTATTTGA	GAGCGCTACCTGTACTGTCG	AGCCGACTTAGATGGAGTATTTGAGAAAAGGGGAGGTGACCCTTTGCCTGAATGGGGGAGGGGGCGCTCTCCACTCACCGCCTGAGTCCCTGGAACGAGGAGGGCCAGGACATCCTGGATTTCTTCAGGCCGGGCCGGTGGCCGGTCTCCACCGCGTAGGAGGTGCGGTCCATGGCGCGACAGTACAGGTAGCGCTC
PDE4D	5	59189058	59189245	PDE4D_38	188	79	CCGGTCTCCACCGCGTA	CCCCAGTGTCCGCTACAG	CCGGTCTCCACCGCGTAGGAGGTGCGGTCCATGGCGCGACAGTACAGGTAGCGCTCGGTGTCCGAGTAGCCGCGATGCCGGACGCGGCCGGTGGCCCCGCTCGAGGCGTAGCGGCCGCGGGCAGCCCCgggcggcggcgggggcggcggcagggggggcggcggcggcggcTGTAgcggacactgggg
PDE4D	5	59189102	59189300	PDE4D_39	199	81	CAGGTAGCGCTCGGTGTC	CCTGCATCCCCATCACCAC	CAGGTAGCGCTCGGTGTCCGAGTAGCCGCGATGCCGGACGCGGCCGGTGGCCCCGCTCGAGGCGTAGCGGCCGCGGGCAGCCCCgggcggcggcgggggcggcggcagggggggcggcggcggcggcTGTAgcggacactggggctggggctggggcgagggtggcggcggcgggggcaggtggtgatggggatgcagg
PDE4D	5	59189226	59189408	PDE4D_40	183	73	GGCTGTAGCGGACACTGG	CGGAGAGGGCAGCGACA	ggcTGTAgcggacactggggctggggctggggcgagggtggcggcggcgggggcaggtggtgatggggatgcaggaggcggaactggggctgccggagcgggTACTGGTGGTGCTGCTCGTGCCTCCAGAGATGCTTGGGGGCTTTGAGCGTGGCCCCGCCGGCGCTGTCGCTGCCCTCTCCG
PDE4D	5	59189319	59189477	PDE4D_41	159	75	cggagcgggTACTGGTG	GCAGCAGGTCGCGGAG	cggagcgggTACTGGTGGTGCTGCTCGTGCCTCCAGAGATGCTTGGGGGCTTTGAGCGTGGCCCCGCCGGCGCTGTCGCTGCCCTCTCCGCTGCCCGCCCGGGCCGGCGCGCTGCTGCCCTCTGCCTCCATCCTGGCTCGCGGCTCCGCGACCTGCTGC
PDE4D	5	59284286	59284485	PDE4D_42	200	50	ATGGGGAAATGACATCTGAGGG	ACCCTATCTTGTCCGGAGACTTT	ATGGGGAAATGACATCTGAGGGCACTCACCCACTGGATTCTGCAGAAGTGATAGCAATCAGCGGCAGAATCTTCAGGGGGAGGCTGGTTGGTCGTTGAATGTTCTCTGATTCACTTTTCAAGTCAGCTTGTTCCAACTGTCTGAAGGCGAGAGGGGGAAGCTGAATATTGCGACATGAAAGTCTCCGGACAAGATAGGGT
PDE4D	5	59284410	59284606	PDE4D_43	197	42	AGCTTGTTCCAACTGTCTGAAGG	ATGTAATGATAAACAGTGTGATTTTTGTTG	AGCTTGTTCCAACTGTCTGAAGGCGAGAGGGGGAAGCTGAATATTGCGACATGAAAGTCTCCGGACAAGATAGGGTTCCATTCCGCGGAAAGGGTCTTCCTCTTCATTACTGGAATGTAGTGTTTCCTCAGAGGCCTGAGGTAATAATTCAAGAAAGTACATATAATCAACAAAAATCACACTGTTTATCATTACAT
PDE4D	5	59481273	59481469	PDE4D_44	197	32	AACGTTTCCCACAAGCCTAATCA	CACTGGAAACACTAGTTCCCATTTTA	AACGTTTCCCACAAGCCTAATCATGATAGCATAGCATTAAAATCCAAAACCAAAACTAAAATGTTATATGTACATGTGTTTAGAAAATAGATGAAAACAAAAGTTACTTACACTTTTGCTCCGAGAAAGCAAATCACAGGTATTTCTTTTCATCGTGGTGTTTTAAGTAATTAAAATGGGAACTAGTGTTTCCAGTG
FOXQ1	6	1312890	1313077	FOXQ1_1	188	73	CTGCGCGAAGGAAGAGGGTA	GCAGTCCCCATCTGAGCC	CTGCGCGAAGGAAGAGGGTACGACGCCGGGGAGGGACTGGGTGCGCGGGCATGAAGTTGGAGGTGTTCGTCCCTCGCGCGGCCCACGGGGACAAGCAGGGCAGTGACCTGGAGGGCGCGGGCGGCAGCGACGCGCCGTCCCCGCTGTCGGCGGCGGGAGACGACTCCCTGGGCTCAGATGGGGACTGC
FOXQ1	6	1312973	1313149	FOXQ1_2	177	76	CACGGGGACAAGCAGGG	GCCTCCCGCACTCTGTTC	CACGGGGACAAGCAGGGCAGTGACCTGGAGGGCGCGGGCGGCAGCGACGCGCCGTCCCCGCTGTCGGCGGCGGGAGACGACTCCCTGGGCTCAGATGGGGACTGCGCGGCCAACAGCCcggccgcgggcggcggcgccagagatacgcagggcgacggcgaacagagtgcgggaggc
FOXQ1	6	1313107	1313287	FOXQ1_3	181	78	CGCCAGAGATACGCAGGG	CCGCGTATATGGCTTGCTG	cgccagagatacgcagggcgacggcgaacagagtgcgggaggcgggccgggcgcggaggaggcgatcccggcagcagctgctgcagcggtggtggcggagggcgcggaggccggggcggcggggccaggcgcgggcggcgcggggagcggcgagggtgCACGCAGCAAGCCATATACGCGG
FOXQ1	6	1313159	1313322	FOXQ1_4	164	77	GCGGAGGAGGCGATCC	ATGAGCGCGATGTACGAGTAGG	gcggaggaggcgatcccggcagcagctgctgcagcggtggtggcggagggcgcggaggccggggcggcggggccaggcgcgggcggcgcggggagcggcgagggtgCACGCAGCAAGCCATATACGCGGCGGCCCAAGCCCCCCTACTCGTACATCGCGCTCAT
FOXQ1	6	1313263	1313448	FOXQ1_5	186	66	TGCACGCAGCAAGCCATATAC	TTGTGGCGCACGGAGTT	tgCACGCAGCAAGCCATATACGCGGCGGCCCAAGCCCCCCTACTCGTACATCGCGCTCATCGCCATGGCCATCCGCGACTCGGCGGGCGGGCGCTTGACGCTGGCGGAGATCAACGAGTACCTCATGGGCAAGTTCCCCTTTTTCCGCGGCAGCTACACGGGCTGGCGCAACTCCGTGCGCCACAA
FOXQ1	6	1313401	1313594	FOXQ1_6	194	66	CTTTTTCCGCGGCAGCTACA	ggTGGCTGAGGCGCTTG	CTTTTTCCGCGGCAGCTACACGGGCTGGCGCAACTCCGTGCGCCACAACCTTTCGCTCAACGACTGCTTCGTCAAGGTGCTGCGCGACCCCTCGCGGCCCTGGGGCAAGGACAACTACTGGATGCTCAACCCCAACAGCGAGTACACCTTCGCCGACGGGGTCTTCCGCCGCCGCCGCAAGCGCCTCAGCCAcc
FOXQ1	6	1313732	1313910	FOXQ1_8	179	76	GGCAAGTTCTCCAGCTCCTTC	CAGAGCGGCAGCAGGG	GGCAAGTTCTCCAGCTCCTTCGCCATCGACAGCATCCTGCGCAAGCCCTTCCGCAGCCGCCGCCTCAGGGACACGGCCCCCGGGACGACGCTTCAGTGGGGCGCCGCGCCCTGCCCGCCGCTGCCCGCGTTCCCCGCGCTCCTCCCCGCGGCGCCCTGCAGGGCCCTGCTGCCGCTCTG
FOXQ1	6	1313814	1314003	FOXQ1_9	190	82	GGACGACGCTTCAGTGGG	GCCGGGAGAGGTGCAAG	GGACGACGCTTCAGTGGGGCGCCGCGCCCTGCCCGCCGCTGCCCGCGTTCCCCGCGCTCCTCCCCGCGGCGCCCTGCAGGGCCCTGCTGCCGCTCTGCGCGTAcggcgcgggcgagccggcgcggctgggcgcgcgcgAGGCCGAGGTGCCACCGACCGCGCCGCCCCTCCTGCTTGCACCTCTCCCGGC
FOXQ1	6	1313896	1314067	FOXQ1_10	172	82	CCTGCTGCCGCTCTGC	CAGGGGGCAGTACAGGTG	CCTGCTGCCGCTCTGCGCGTAcggcgcgggcgagccggcgcggctgggcgcgcgcgAGGCCGAGGTGCCACCGACCGCGCCGCCCCTCCTGCTTGCACCTCTCCCGGCGGCGGCCCCCGCCAAGCCACTCCGAggcccggcggccggcggcgcgcACCTGTACTGCCCCCTG
FOXQ1	6	1313984	1314160	FOXQ1_11	177	78	CTGCTTGCACCTCTCCC	CGGCGCTACTCAGGCTA	CTGCTTGCACCTCTCCCGGCGGCGGCCCCCGCCAAGCCACTCCGAggcccggcggccggcggcgcgcACCTGTACTGCCCCCTGCGGCTGCCCGCAGCCCTGCAGGCGGCCTCAGTCCGCCGCCCTGGCCCGCACCTGCCGTACCCGGTGGAGACGCTCCTAGCCTGAGTAGCGCCG
FOXQ1	6	1314050	1314244	FOXQ1_12	195	75	CACCTGTACTGCCCCCTG	CCTCTGGATTCAAAGTGCAAAGTC	cACCTGTACTGCCCCCTGCGGCTGCCCGCAGCCCTGCAGGCGGCCTCAGTCCGCCGCCCTGGCCCGCACCTGCCGTACCCGGTGGAGACGCTCCTAGCCTGAGTAGCGCCGCGGGGCCCGGGAACGCCGAGTGCGCGCCGTCGGGGAGGCGGGAACGCGGGCCCGCGCGCGGACTTTGCACTTTGAATCCAGAGG
C6ORF211	6	151773575	151773754	C6ORF211_1	180	60	TTAAAGCCACACCACCCCCAT	CGCAAAAGTGGGGAGGAGAAAA	TTAAAGCCACACCACCCCCATTCTCAGCTCCTCCTTCGCGGCGGTACCGCCTCTGTTTCTGCGGCGATTGAACAGCCGAGCTTTGCGGCCGGGATCGCGGAAAGTGATGGCTGTCGTCCCGGCGTCTCTCTCAGGACAGGACGTGGGGTTAGTCTAGCTTTTCTCCTCCCCACTTTTGCG
C6ORF211	6	151775608	151775794	C6ORF211_2	187	33	TCCAGAAACTAAAAGATAGCCAGT	TCTTACCTCTCCGTGTTTCTCAA	TCCAGAAACTAAAAGATAGCCAGTCTTCTAGTATTGATGCTGCTAAGTTATATATTGCATGTGACTCTTTTCTAGATCATTTGCATATCTTACAATTAAAGACAGAATACCACAGATCTTAACTAAGGTTATTGATACATTGCATCGACATAAAAGTGAATTTTTTGAGAAACACGGAGAGGTAAGA
C6ORF211	6	151775706	151775902	C6ORF211_3	197	28	AAGACAGAATACCACAGATCTTAACT	ACTTGGCCCATCTATTGATTTTTACA	AAGACAGAATACCACAGATCTTAACTAAGGTTATTGATACATTGCATCGACATAAAAGTGAATTTTTTGAGAAACACGGAGAGGTAAGAATTGTTTTAACTTTTAATTTTTTGTTAATTTCTCAACAGAAACATAATAAATAGTTCTTGAAGGTATCAATTTTCCTTTAAATGTAAAAATCAATAGATGGGCCAAGT
C6ORF211	6	151779410	151779604	C6ORF211_4	195	35	GAATTGCACAGACACACACACAC	TCTGTTGATATTCTAGGTACTGATTCCA	GAATTGCACAGACACACACACACACACAATTTATTTTTCTTGTATTTTTGCAGGAAGGCGTGGAAGCTGAAAAGAAAGCTATCTCTCTCCTTTCTAAATTACGGAATGAATTGCAAACAGATAAACCATTTATCCCCTTGGTTGAGAAATTTGTTGATACTGATATATGGAATCAGTACCTAGAATATCAACAGA
C6ORF211	6	151779543	151779742	C6ORF211_5	200	35	CCCCTTGGTTGAGAAATTTGTTG	TCTAAACATTTGATAGTTGATGATTACACA	CCCCTTGGTTGAGAAATTTGTTGATACTGATATATGGAATCAGTACCTAGAATATCAACAGAGTCTTTTAAATGAAAGTGATGGAAAATCAAGATGGTTCTACTCACCGTGGTTGTTGGTAGAATGTTACATGTATCGAAGAATTCATGAAGCAATTATCCAGAGGTACGTGTGTAATCATCAACTATCAAATGTTTAGA
C6ORF211	6	151785555	151785754	C6ORF211_6	200	33	AAAATGTTTCACTTTGTTTTTCTCCTAC	CCTGCAGAAGTTTAAAAAACTCATCT	AAAATGTTTCACTTTGTTTTTCTCCTACTTTAGTCCACCAATCGATTACTTTGATGTATTTAAAGAATCAAAAGAGCAAAATTTCTATGGGTCACAGGAATCCATCATTGCTTTATGTACTCACCTGCAACAATTGATAAGAACTATTGAAGACCTAGATGAAAATCAGCTGAAAGATGAGTTTTTTAAACTTCTGCAGG
C6ORF211	6	151785695	151785883	C6ORF211_7	189	26	GAACTATTGAAGACCTAGATGAAAATCAG	TCTTTTAACACCACTAGATAAAAAATCATCA	GAACTATTGAAGACCTAGATGAAAATCAGCTGAAAGATGAGTTTTTTAAACTTCTGCAGGTAAATGTGATCATTAATCTTCTGAGTATGTTTTATTTAAACAGAAAATAAACTGCTATACAGTTAACAAAACATGTAAATATTTTTCTTTGCTATAATTGATGATTTTTTATCTAGTGGTGTTAAAAGA
C6ORF211	6	151789418	151789616	C6ORF211_8	199	35	AATGGAGTTTTGTTGGCTATTCAG	GCAATGACCAAAGATGTTCCATATCA	AATGGAGTTTTGTTGGCTATTCAGAAGAAGGGTGAATATTTTGTACTTTTTCTTTTTCAGATTTCACTGTGGGGAAATAAGTGTGATCTGTCTCTCTCAGGTGGAGAAAGTAGTTCTCAGAATACCAATGTACTAAATTCATTGGAAGACCTAAAACCTTTCATTTTATTGAATGATATGGAACATCTTTGGTCATTGC
C6ORF211	6	151789556	151789754	C6ORF211_9	199	36	TCATTGGAAGACCTAAAACCTTTCAT	GAACCTCAGTAGCCAGTTCAGAG	TCATTGGAAGACCTAAAACCTTTCATTTTATTGAATGATATGGAACATCTTTGGTCATTGCTTAGCAATTGCAAGAAAACAAGAGAAAAAGCTTCTGCTACTAGAGTGTATATTGTTCTCGATAATTCTGGATTTGAGCTTGTTACAGATTTAATATTAGCCGACTTCTTGTTGTCCTCTGAACTGGCTACTGAGGTTC
C6ORF211	6	151789674	151789867	C6ORF211_10	194	35	TCGATAATTCTGGATTTGAGCTTGT	CCCACACTTGGACATCCACTTA	TCGATAATTCTGGATTTGAGCTTGTTACAGATTTAATATTAGCCGACTTCTTGTTGTCCTCTGAACTGGCTACTGAGGTTCATTTTTATGGAAAAACAATTCCATGGTTTGTTTCTGATACTACTATACATGATTTTAATTGGTTAATTGAACAGGTAAAACACAGTAATCATAAGTGGATGTCCAAGTGTGGG
C6ORF211	6	151789813	151789997	C6ORF211_11	185	41	TTGGTTAATTGAACAGGTAAAACACA	GTGCCTTCTGTAGTTCAGCATA	TTGGTTAATTGAACAGGTAAAACACAGTAATCATAAGTGGATGTCCAAGTGTGGGGCTGACTGGGAAGAGTATATTAAAATGGGTAAATGGGTTTACCACAATCATATATTTTGGACTCTGCCTCATGAGTACTGTGCAATGCCTCAGGTTGCACCTGACTTATATGCTGAACTACAGAAGGCAC
C6ORF211	6	151789870	151790051	C6ORF211_12	182	38	TGACTGGGAAGAGTATATTAAAATGGGT	TTCTGTCACCTGTCAACTTCCTG	TGACTGGGAAGAGTATATTAAAATGGGTAAATGGGTTTACCACAATCATATATTTTGGACTCTGCCTCATGAGTACTGTGCAATGCCTCAGGTTGCACCTGACTTATATGCTGAACTACAGAAGGCACATTTAATTTTATTCAAGGGTGATTTGAATTACAGGAAGTTGACAGGTGACAGAA
C6ORF211	6	151789978	151790177	C6ORF211_13	200	44	TGCTGAACTACAGAAGGCACATT	GGAGCTGTTCCCCTTGCC	TGCTGAACTACAGAAGGCACATTTAATTTTATTCAAGGGTGATTTGAATTACAGGAAGTTGACAGGTGACAGAAAATGGGAGTTTTCTGTTCCATTTCATCAGGCTCTGAATGGCTTCCATCCTGCACCACTCTGTACCATAAGAACATTAAAAGCTGAAATTCAGGTTGGTCTGCAGCCTGGGCAAGGGGAACAGCTCC
C6ORF211	6	151790099	151790294	C6ORF211_14	196	48	CCTGCACCACTCTGTACCATAAG	AAAGGTGCTCACCAGATCTTTCT	CCTGCACCACTCTGTACCATAAGAACATTAAAAGCTGAAATTCAGGTTGGTCTGCAGCCTGGGCAAGGGGAACAGCTCCTGGCCTCTGAGCCCAGCTGGTGGACCACTGGAAAATATGGAATATTTCAGTACGATGGTCCCCTTTGACTTGATTTAGGAGCTCTCAGTTGCATAGAAAGATCTGGTGAGCACCTTT
CCDC170	6	151815213	151815412	CCDC170_1	200	74	CTTCCTCAGGGCCGGTTC	GGAAAAGGGTGCAAATCAGGG	CTTCCTCAGGGCCGGTTCCGGGTCCGAGCGCGCCCCCGGGCTCGGGTCGTCATGAGCCTGGACTGCACCAGCCATATCGCGCTGGGTGCCGCTTCGCCAGCGCCCGAGGTACGGTCCCAgccgccggccgcgcgcgggggTGGCCCTGGGGATAGACGACCCAGGAGGGGCCGAGGCGCCCCTGATTTGCACCCTTTTCC
CCDC170	6	151857324	151857521	CCDC170_2	198	42	TGCGTAGCATGTTTGACATATTTGG	AGCCACATTCCGATAGTGGTTTA	TGCGTAGCATGTTTGACATATTTGGAATACAAAGAATGCTTCTGCCTTTAATCTGGCTTTGTGCAGCTGCACGGAAAAGATCGTTTAACACTCTTCTTTATATTTTGTATTTTGGGGGAATTCTACCAGGAAACTTACGATCATCTTTCGGAAGTCCCGGTCACGCGGGAGCAGTTAAACCACTATCGGAATGTGGCT
CCDC170	6	151857472	151857660	CCDC170_3	189	45	CGGAAGTCCCGGTCACG	GGATTACAGGCGTGATCTGTTTCATTT	CGGAAGTCCCGGTCACGCGGGAGCAGTTAAACCACTATCGGAATGTGGCTCAAAATGCTCGAAGTGAACTTGCAGCAACTTTGGTCAAATTTGAATGTGCTCAGTCTGAGGTAAGATAATGCATTTCCAGCACTCAGAAATGGGCCTTCTTAGCTTCTTATAAAATGAAACAGAtcacgcctgtaatcc
CCDC170	6	151859093	151859286	CCDC170_4	194	34	TTTAAATGATGGCTTTGGGTTTCTT	AGGAGAGATGATTTTCTGGCATT	TTTAAATGATGGCTTTGGGTTTCTTAAAGATAATTCAAACTTATGTTGTTAAGGTTTTTTTTTTTTTTAACTTCTTTTCCATGTTAGCTTCAAGACCTCCGATCCAAGATGCTTTCTAAAGAAGTCTCCTGTCAAGAACTGAAAGCTGAAATGGAGAGCTACAAGGAAAACAATGCCAGAAAATCATCTCTCCT
CCDC170	6	151859176	151859375	CCDC170_5	200	42	TTAGCTTCAAGACCTCCGATCCA	CGTGAGCTGTGATTTCTGTTCTG	TTAGCTTCAAGACCTCCGATCCAAGATGCTTTCTAAAGAAGTCTCCTGTCAAGAACTGAAAGCTGAAATGGAGAGCTACAAGGAAAACAATGCCAGAAAATCATCTCTCCTTACCTCTTTGAGAGACAGAGTTCAGGAACTAGAAGAAGAATCAGCAGCACTTTCCACTTCTAAAATCAGAACAGAAATCACAGCTCACG
CCDC170	6	151859321	151859501	CCDC170_6	181	35	GAAGAATCAGCAGCACTTTCCAC	TCTTGCTATCAGAAGCTAGTATTTTAATG	GAAGAATCAGCAGCACTTTCCACTTCTAAAATCAGAACAGAAATCACAGCTCACGCTGCAATCAAGGAGAACCAGGAATTAAAGAAGAAAGTTGTAGAGTTAAATGAAAAATTACAGTAAGGATACTGCAATATATTTTTCGCTTTAGCTAGCATTAAAATACTAGCTTCTGATAGCAAGA
CCDC170	6	151865649	151865831	CCDC170_7	183	37	TGATGAATGTTATCTTCCATGGTGT	CTGATGCCTTGTCATTCCTCTCA	TGATGAATGTTATCTTCCATGGTGTTAAATTCTGACTTATTTGTTATTTGCCTAACAGAAAGTGTTCAAAAGAAAATGAGGAGAATAAGAAACAAGTTTCAAAGAATTGCAGGAAACATGAGGAATTTCTGACTCAACTGCGTGACTGCTTGGATCCAGATGAGAGGAATGACAAGGCATCAG
CCDC170	6	151865718	151865907	CCDC170_8	190	37	AAGAAAATGAGGAGAATAAGAAACAAGT	GCCACATGTCAGAATCACCACTA	AAGAAAATGAGGAGAATAAGAAACAAGTTTCAAAGAATTGCAGGAAACATGAGGAATTTCTGACTCAACTGCGTGACTGCTTGGATCCAGATGAGAGGAATGACAAGGCATCAGATGAAGATTTAATTTTAAAGGTGTCTGTATGCAGATTAAAAAGTCTATAAATGTAGTGGTGATTCTGACATGTGGC
CCDC170	6	151869373	151869560	CCDC170_9	188	37	ACTTGCTTAGAGAAAATGATGAAATTGT	GAAGCCAGCCTCATGATCGTT	ACTTGCTTAGAGAAAATGATGAAATTGTTAATTTTTATAGGACAGCTGTAATTGCTTTCTCTTCAGCTTAGAGACCTGCGCAAAGAAAATGAATTCGTGAAAGGACAAATTGTTATTCTTGAAGAGACTATAAATGTCCATGAGATGGAAGCAAAAGCTAGCAGAGAAACGATCATGAGGCTGGCTTC
CCDC170	6	151869468	151869667	CCDC170_10	200	43	CGTGAAAGGACAAATTGTTATTCTTGA	TCAACATGGTCCCAGATGCAC	CGTGAAAGGACAAATTGTTATTCTTGAAGAGACTATAAATGTCCATGAGATGGAAGCAAAAGCTAGCAGAGAAACGATCATGAGGCTGGCTTCAGAAGTCAACAGAGAGCAGAAAAAAGCTGCCTCCTGTACTGAAGAGAAAGAGAAGCTGAACCAGGTATGATATGTGAAGTATACGTGTGCATCTGGGACCATGTTGA
CCDC170	6	151894238	151894422	CCDC170_11	185	46	TGCCATAGCAAATGCAGGTGT	GCTCACTTCCTGCTTTGAGGC	TGCCATAGCAAATGCAGGTGTACCCTGTTGACTTCTAATGGTATTGTCTTCACTTTCTGTAATCATTTTAGGACCTGCTCAGTGCTGTAGAAGCAAAAGAAGCTCTTGAAAGGGAAGTTAAGATCTTCCAAGAAAGGCTGCTTGCTGGCCAGCAGGTCTGGGATGCCTCAAAGCAGGAAGTGAGC
CCDC170	6	151894314	151894503	CCDC170_12	190	49	GCTCAGTGCTGTAGAAGCAAAAG	GTACTGGCTTTGTGAGGTTGTGA	GCTCAGTGCTGTAGAAGCAAAAGAAGCTCTTGAAAGGGAAGTTAAGATCTTCCAAGAAAGGCTGCTTGCTGGCCAGCAGGTCTGGGATGCCTCAAAGCAGGAAGTGAGCCTCCTGAAGAAAAGCTCTTCTGAGTTGGAGAAGAGTTTGAAGGCCAGTCAGGATGCAGTCACAACCTCACAAAGCCAGTAC
CCDC170	6	151894415	151894607	CCDC170_13	193	49	AAGTGAGCCTCCTGAAGAAAAGC	CGGCTGTCCATTTCTCGAATCTT	AAGTGAGCCTCCTGAAGAAAAGCTCTTCTGAGTTGGAGAAGAGTTTGAAGGCCAGTCAGGATGCAGTCACAACCTCACAAAGCCAGTACTTCTCATTTAGGGAGAAAATCGCAGCCCTCCTTAGGGGCAGATTGAGCATGACTGGGTCCACTGAGGACACCATTTTGGAGAAGATTCGAGAAATGGACAGCCG
CCDC170	6	151894473	151894653	CCDC170_14	181	52	GGATGCAGTCACAACCTCACAA	GTCTGTAAACAGCCATGACCC	GGATGCAGTCACAACCTCACAAAGCCAGTACTTCTCATTTAGGGAGAAAATCGCAGCCCTCCTTAGGGGCAGATTGAGCATGACTGGGTCCACTGAGGACACCATTTTGGAGAAGATTCGAGAAATGGACAGCCGGGAAGAAAGCAGGGACCGGGTGAGTGGGTCATGGCTGTTTACAGAC
CCDC170	6	151906963	151907152	CCDC170_15	190	46	ATGTGAACACTTCCTTGCATCTG	CTGACCCTGAAGAGTCTCCAACA	ATGTGAACACTTCCTTGCATCTGAAACAAGGCTTATTCTTGATCTGTTTCTTTGTTTCCAGATGGTCTCCCAGCTTGAAGCCCAAATATCTGAGCTTGTTGAACAGTTGGGAAAGGAGTCTGGGTTTCACCAGAAAGCTCTCCAGAGGGCCCAGAAAGCAGAGAATATGTTGGAGACTCTTCAGGGTCAG
CCDC170	6	151907062	151907256	CCDC170_16	195	49	TGAACAGTTGGGAAAGGAGTCTG	TTCCACTCATGGACATGCCCTC	TGAACAGTTGGGAAAGGAGTCTGGGTTTCACCAGAAAGCTCTCCAGAGGGCCCAGAAAGCAGAGAATATGTTGGAGACTCTTCAGGGTCAGCTGACACACCTGGAGGCAGAGCTGGTTTCTGGAGGTGTTTTGCGAGACAACTTGAATTTTGAGAAACAAAAAGTAATGACCCGAGGGCATGTCCATGAGTGGAA
CCDC170	6	151914162	151914352	CCDC170_17	191	42	AGAAAGAGGAAGAGATTCTGTGAGAT	CAGCTGCTCTGTTCGAGCTAAA	AGAAAGAGGAAGAGATTCTGTGAGATCACTCATTAACTTTGACTTTCATGTCCCATTTTTGTTTCTGTTCTTGGGTTTAGTATCTTAAATTTCTGGATCAGCTTTCTCAGAAAATGAAGTTGGACCAGATGGCTGCCGAACTTGGCTTTGACATGCGGCTGGACGTGGTTTTAGCTCGAACAGAGCAGCTG
CCDC170	6	151914268	151914452	CCDC170_18	185	46	TCAGAAAATGAAGTTGGACCAGATG	TCTTCTCTCAATACTAGCAAGTTTCAAT	TCAGAAAATGAAGTTGGACCAGATGGCTGCCGAACTTGGCTTTGACATGCGGCTGGACGTGGTTTTAGCTCGAACAGAGCAGCTGGTTCGTCTTGAGAGCAATGCAGTCATTGAGAACAAGACCATTGCCCACAATTTGCAGAGAAAGGTAGGAGATATTGAAACTTGCTAGTATTGAGAGAAGA
CCDC170	6	151917386	151917566	CCDC170_19	181	40	AGAGATCAACATTATCTGGGTAACTCATT	TGCGTGCCTGCTTCTCC	AGAGATCAACATTATCTGGGTAACTCATTTATATTTACTATTGTTCAATTATTAAAAAAAAAATCCCTGTTTGCATCAAACCAGCTAAAGACACAGAAAGAGAGACTGGAGAGCAAAGAATTACACATGAGCCTCCTCCGGCAGAAAATAGCCCAGCTGGAGGAGGAGAAGCAGGCACGCA
CCDC170	6	151917495	151917691	CCDC170_20	197	54	AGAGCAAAGAATTACACATGAGCC	CAGTTTGGCTTTGAGCTCGGT	AGAGCAAAGAATTACACATGAGCCTCCTCCGGCAGAAAATAGCCCAGCTGGAGGAGGAGAAGCAGGCACGCACGGCCTTGGTGGTTGAGAGGGACAACGCGCATCTTACCATCAGGAACTTGCAGAAGAAGGTGGAGAGGCTGCAGAAAGAGCTGAACACGTGTCGAGACTTGCACACCGAGCTCAAAGCCAAACTG
CCDC170	6	151917571	151917758	CCDC170_21	188	50	CTTGGTGGTTGAGAGGGACAAC	ACAGTAACCAGCAAAAAGCAACA	CTTGGTGGTTGAGAGGGACAACGCGCATCTTACCATCAGGAACTTGCAGAAGAAGGTGGAGAGGCTGCAGAAAGAGCTGAACACGTGTCGAGACTTGCACACCGAGCTCAAAGCCAAACTGGCCGACACCAATGAACTGAAGGCAAGTGCTTGGCTTCATTTTGTTGTTGCTTTTTGCTGGTTACTGT
CCDC170	6	151936506	151936705	CCDC170_22	200	36	TGATTTGTCATGTTTATACAGTTTTCCT	TGTTCTGTGGTATCCAGTTCTGAC	TGATTTGTCATGTTTATACAGTTTTCCTAACTAAATACAAAAGGAGTTATCAGCATTCTCTTGACTTTCTAGATTAAAACTTTGGAACAGACTAAAGCCATTGAAGATCTAAACAAATCCAGAGACCAACTGGAGAAGATGAAGGAGAAAGCTGAGAAAAAGCTCATGTCTGTCAAGTCAGAACTGGATACCACAGAACA
CCDC170	6	151936618	151936816	CCDC170_23	199	41	ACAAATCCAGAGACCAACTGGAG	ACCTGCTTTTCTCTCTTTTCTGC	ACAAATCCAGAGACCAACTGGAGAAGATGAAGGAGAAAGCTGAGAAAAAGCTCATGTCTGTCAAGTCAGAACTGGATACCACAGAACATGAGGCTAAGGAGAATAAAGAAAGGGCCAGAAACATGATAGAAGTGGTAACCAGTGAAATGAAGACACTAAAAAAATCTCTGGAAGAAGCAGAAAAGAGAGAAAAGCAGGT
CCDC170	6	151936689	151936875	CCDC170_24	187	40	CTGGATACCACAGAACATGAGGC	CAAGCTCTTGAATTGTCCTGTCAT	CTGGATACCACAGAACATGAGGCTAAGGAGAATAAAGAAAGGGCCAGAAACATGATAGAAGTGGTAACCAGTGAAATGAAGACACTAAAAAAATCTCTGGAAGAAGCAGAAAAGAGAGAAAAGCAGGTGGGTCTAAATCTGGTGATGAAACCTTGTTTAGGAAATGACAGGACAATTCAAGAGCTTG
CCDC170	6	151939019	151939206	CCDC170_25	188	44	TGGCTCAGCAGTAGTTGATACAT	ACAAAGTGATGCTGATGTGAATGG	TGGCTCAGCAGTAGTTGATACATTTTGTTCTCCCAGTTAATGAGTTTCTGTTTGATATTGCAGCTGGCAGACTTCAGGGAGGTGGTGTCGCAGATGCTAGGCTTGAACGTGACCAGCCTTGCTCTTCCTGATTATGAAATCATCAAGTGTCTTGAAAGATTGGTCCATTCACATCAGCATCACTTTGT
CCDC170	6	151939132	151939319	CCDC170_26	188	45	CAGCCTTGCTCTTCCTGATTATG	CATGTCTTATGGCCACCTCTCTC	CAGCCTTGCTCTTCCTGATTATGAAATCATCAAGTGTCTTGAAAGATTGGTCCATTCACATCAGCATCACTTTGTTACCTGTGCCTGCCTCAAAGATGTGACTACTGGGCAAGAGAGGCACCCACAAGGCCATTTACAGCTTCTTCATTGAACACTGTATCTCTTGAGAGAGGTGGCCATAAGACATG
ESR1	6	152128959	152129145	ESR1_1	187	63	GGCTGTGCTCTTTTTCCAGGT	ATCTTGAGCTGCGGACGGTT	GGCTGTGCTCTTTTTCCAGGTGGCCCGCCGGTTTCTGAGCCTTCTGCCCTGCGGGGACACGGTCTGCACCCTGCCCGCGGCCACGGACCATGACCATGACCCTCCACACCAAAGCATCTGGGATGGCCCTACTGCATCAGATCCAAGGGAACGAGCTGGAGCCCCTGAACCGTCCGCAGCTCAAGAT
ESR1	6	152129088	152129268	ESR1_2	181	67	TACTGCATCAGATCCAAGGGAA	CCGTAGACCTGCGCGTTG	TACTGCATCAGATCCAAGGGAACGAGCTGGAGCCCCTGAACCGTCCGCAGCTCAAGATCCCCCTGGAGCGGCCCCTGGGCGAGGTGTACCTGGACAGCAGCAAGCCCGCCGTGTACAACTACCCCGAGGGCGCCGCCTACGAGTTCAACGCCGCGGCCGCCGCCAACGCGCAGGTCTACGG
ESR1	6	152129171	152129364	ESR1_3	194	70	GTGTACCTGGACAGCAGCAA	CTCGGAGACACGCTGTTGAG	GTGTACCTGGACAGCAGCAAGCCCGCCGTGTACAACTACCCCGAGGGCGCCGCCTACGAGTTCAACGCCGCGGCCGCCGCCAACGCGCAGGTCTACGGTCAGACCGGCCTCCCCTACGGCCCCGGGTCTGAGGCTGCGGCGTTCGGCTCCAACGGCCTGGGGGGTTTCCCCCCACTCAACAGCGTGTCTCCGAG
ESR1	6	152129255	152129454	ESR1_4	200	70	GCGCAGGTCTACGGTCA	GGCTCGTTCTCCAGGTAGTAG	GCGCAGGTCTACGGTCAGACCGGCCTCCCCTACGGCCCCGGGTCTGAGGCTGCGGCGTTCGGCTCCAACGGCCTGGGGGGTTTCCCCCCACTCAACAGCGTGTCTCCGAGCCCGCTGATGCTACTGCACCCGCCGCCGCAGCTGTCGCCTTTCCTGCAGCCCCACGGCCAGCAGGTGCCCTACTACCTGGAGAACGAGCC
ESR1	6	152129362	152129561	ESR1_5	200	75	GAGCCCGCTGATGCTACTG	CTCCCTCCCTCCCTCCTG	GAGCCCGCTGATGCTACTGCACCCGCCGCCGCAGCTGTCGCCTTTCCTGCAGCCCCACGGCCAGCAGGTGCCCTACTACCTGGAGAACGAGCCCAGCGGCTACACGGTGCGCGAGGCCGGCCCGCCGGCATTCTACAGGTAcccgcgcccgcgccgcccgtcggggtggccgccgcgcccggcAggagggagggagggag
ESR1	6	152163668	152163866	ESR1_6	199	46	TCTCCCAGAGAGTGCATGTTTTG	TGGTAGCCTGAAGCATAGTCATT	TCTCCCAGAGAGTGCATGTTTTGCTTTTCTAATGTTAATGGATTTACTGTTTTTTTCCCCCCAGGCCAAATTCAGATAATCGACGCCAGGGTGGCAGAGAAAGATTGGCCAGTACCAATGACAAGGGAAGTATGGCTATGGAATCTGCCAAGGAGACTCGCTACTGTGCAGTGTGCAATGACTATGCTTCAGGCTACCA
ESR1	6	152163769	152163967	ESR1_7	199	45	AGATTGGCCAGTACCAATGACAA	TGCTCATAGGATCAAAAATAGAAGTCGT	AGATTGGCCAGTACCAATGACAAGGGAAGTATGGCTATGGAATCTGCCAAGGAGACTCGCTACTGTGCAGTGTGCAATGACTATGCTTCAGGCTACCATTATGGAGTCTGGTCCTGTGAGGGCTGCAAGGCCTTCTTCAAGAGAAGTATTCAAGGTAATAGTGTGTTGAAAACGACTTCTATTTTTGATCCTATGAGCA
ESR1	6	152201703	152201901	ESR1_8	199	44	AAAACAGCCTCCAAAAGGTTTCC	TTCATCATTCCCACTTCGTAGCA	AAAACAGCCTCCAAAAGGTTTCCCTGTAGATTCTGACTGGCTAAGTTTCCTGAAATAATATTAATTCTGTCCTCTTGCTTTTAATAGGACATAACGACTATATGTGTCCAGCCACCAACCAGTGCACCATTGATAAAAACAGGAGGAAGAGCTGCCAGGCCTGCCGGCTCCGTAAATGCTACGAAGTGGGAATGATGAA
ESR1	6	152201799	152201981	ESR1_9	183	56	ACTATATGTGTCCAGCCACCAAC	TATTCCAATGGGTAGAGCCAGCA	ACTATATGTGTCCAGCCACCAACCAGTGCACCATTGATAAAAACAGGAGGAAGAGCTGCCAGGCCTGCCGGCTCCGTAAATGCTACGAAGTGGGAATGATGAAAGGTGGTAGGTACATCTCTCCCAGGGGCCCTTGGGGATGGCCCTGGCCACCGCCCAGTGCTGGCTCTACCCATTGGAATA
ESR1	6	152265183	152265378	ESR1_10	196	38	agctcaccTGTGCTTGAAAGTAT	CCTGCCCTCCCCATCATCTC	agctcaccTGTGCTTGAAAGTATTTCTTCAAATAAAATGAAAGCTGGTTAGCTTTGAAAATTTTTTGTATAAAAGTTTACACGGGAAAAAAATAAACTAATTTTTTTTTCCACCTGTGTTTTCAGGGATACGAAAAGACCGAAGAGGAGGGAGAATGTTGAAACACAAGCGCCAGAGAGATGATGGGGAGGGCAGG
ESR1	6	152265330	152265511	ESR1_11	182	57	AGGGAGAATGTTGAAACACAAGC	CATCCAACAAGGCACTGACCATC	AGGGAGAATGTTGAAACACAAGCGCCAGAGAGATGATGGGGAGGGCAGGGGTGAAGTGGGGTCTGCTGGAGACATGAGAGCTGCCAACCTTTGGCCAAGCCCGCTCATGATCAAACGCTCTAAGAAGAACAGCCTGGCCTTGTCCCTGACGGCCGACCAGATGGTCAGTGCCTTGTTGGATG
ESR1	6	152265430	152265621	ESR1_12	192	54	CCGCTCATGATCAAACGCTCTAA	GATCATGTGAACCAGCTCCCTG	CCGCTCATGATCAAACGCTCTAAGAAGAACAGCCTGGCCTTGTCCCTGACGGCCGACCAGATGGTCAGTGCCTTGTTGGATGCTGAGCCCCCGATACTCTATTCCGAGTATGATCCTACCAGACCCTTCAGTGAAGCTTCGATGATGGGCTTACTGACCAACCTGGCAGACAGGGAGCTGGTTCACATGATC
ESR1	6	152265495	152265694	ESR1_13	200	51	CAGTGCCTTGTTGGATGCTG	CAAGTTCTTGAAAAGCTATTGACTCT	CAGTGCCTTGTTGGATGCTGAGCCCCCGATACTCTATTCCGAGTATGATCCTACCAGACCCTTCAGTGAAGCTTCGATGATGGGCTTACTGACCAACCTGGCAGACAGGGAGCTGGTTCACATGATCAACTGGGCGAAGAGGGTGCCAGGTAAGAATGCGAAGCGCAGCTTTTAAGAGTCAATAGCTTTTCAAGAACTTG
ESR1	6	152332720	152332914	ESR1_14	195	46	TGTTGCATTAATTTCACCAGTAATGAG	TTAGGAGCAAACAGTAGCTTCCC	TGTTGCATTAATTTCACCAGTAATGAGTCTTTTTCATTTGAGTCAGCAGGGTTTTTCTTGCTTGTTTTCAGGCTTTGTGGATTTGACCCTCCATGATCAGGTCCACCTTCTAGAATGTGCCTGGCTAGAGATCCTGATGATTGGTCTCGTCTGGCGCTCCATGGAGCACCCAGGGAAGCTACTGTTTGCTCCTAA
ESR1	6	152332779	152332958	ESR1_15	180	51	GCTTGTTTTCAGGCTTTGTGGAT	TACTCCTAAGCTACAGCCAGGTC	GCTTGTTTTCAGGCTTTGTGGATTTGACCCTCCATGATCAGGTCCACCTTCTAGAATGTGCCTGGCTAGAGATCCTGATGATTGGTCTCGTCTGGCGCTCCATGGAGCACCCAGGGAAGCTACTGTTTGCTCCTAACTTGCTCTTGGACAGGTAAGTGACCTGGCTGTAGCTTAGGAGTA
ESR1	6	152382045	152382224	ESR1_16	180	39	TGAACCCTTTCATGTCTTGTGGA	AACTCCTCTCCCTGCAGATTCAT	TGAACCCTTTCATGTCTTGTGGAAGATTTTCTGttttttaatctttttatttatttatttatttttGCTATGTTTTCATAGGAACCAGGGAAAATGTGTAGAGGGCATGGTGGAGATCTTCGACATGCTGCTGGCTACATCATCTCGGTTCCGCATGATGAATCTGCAGGGAGAGGAGTT
ESR1	6	152382124	152382303	ESR1_17	180	43	AGGAACCAGGGAAAATGTGTAGAG	AAACATTTCATCCAGCATTGAGTT	AGGAACCAGGGAAAATGTGTAGAGGGCATGGTGGAGATCTTCGACATGCTGCTGGCTACATCATCTCGGTTCCGCATGATGAATCTGCAGGGAGAGGAGTTTGTGTGCCTCAAATCTATTATTTTGCTTAATTCTGGTGAGTTGATAACACAAGATAACTCAATGCTGGATGAAATGTTT
ESR1	6	152415465	152415649	ESR1_18	185	53	CCTAGACCTCATCCTCTTTGAGC	TGCTGCTGCAGGGTCAG	CCTAGACCTCATCCTCTTTGAGCTTCTCTCTCTCACTCTCTCTCTGCGCATTCAGGAGTGTACACATTTCTGTCCAGCACCCTGAAGTCTCTGGAAGAGAAGGACCATATCCACCGAGTCCTGGACAAGATCACAGACACTTTGATCCACCTGATGGCCAAGGCAGGCCTGACCCTGCAGCAGCA
ESR1	6	152415549	152415731	ESR1_19	183	58	AAGTCTCTGGAAGAGAAGGACCA	TCCTGTAGGAAGCCCACAGATG	AAGTCTCTGGAAGAGAAGGACCATATCCACCGAGTCCTGGACAAGATCACAGACACTTTGATCCACCTGATGGCCAAGGCAGGCCTGACCCTGCAGCAGCAGCACCAGCGGCTGGCCCAGCTCCTCCTCATCCTCTCCCACATCAGGCACATGAGGTGAGGCATCTGTGGGCTTCCTACAGGA
ESR1	6	152419783	152419975	ESR1_20	193	55	CTTCCTTCCCCTTCTAGGGATTT	GCTAGTGGGCGCATGTAGG	CTTCCTTCCCCTTCTAGGGATTTCAGCACTCCTGGGGCTCGGGTTGGCTCTAAAGTAGTCCTTTCTGTGTCTTCCCACCTACAGTAACAAAGGCATGGAGCATCTGTACAGCATGAAGTGCAAGAACGTGGTGCCCCTCTATGACCTGCTGCTGGAGATGCTGGACGCCCACCGCCTACATGCGCCCACTAGC
ESR1	6	152419856	152420049	ESR1_21	194	59	CCCACCTACAGTAACAAAGGCAT	AAGGAATGCGATGAAGTAGAGCC	CCCACCTACAGTAACAAAGGCATGGAGCATCTGTACAGCATGAAGTGCAAGAACGTGGTGCCCCTCTATGACCTGCTGCTGGAGATGCTGGACGCCCACCGCCTACATGCGCCCACTAGCCGTGGAGGGGCATCCGTGGAGGAGACGGACCAAAGCCACTTGGCCACTGCGGGCTCTACTTCATCGCATTCCTT
ESR1	6	152419958	152420137	ESR1_22	180	59	CTACATGCGCCCACTAGCC	AGGGATTATCTGAACCGTGTGGG	CTACATGCGCCCACTAGCCGTGGAGGGGCATCCGTGGAGGAGACGGACCAAAGCCACTTGGCCACTGCGGGCTCTACTTCATCGCATTCCTTGCAAAAGTATTACATCACGGGGGAGGCAGAGGGTTTCCCTGCCACGGTCTGAGAGCTCCCTGGCTCCCACACGGTTCAGATAATCCCT
MYC	8	128748709	128748898	MYC_1	190	56	GGAACTTACAACACCCGAGCAAG	TTAAAAGGCAAGTGGACTTCGGT	GGAACTTACAACACCCGAGCAAGGACGCGACTCTCCCGACGCGGGGAGGCTATTCTGCCCATTTGGGGACACTTCCCCGCCGCTGCCAGGACCCGCTTCTCTGAAAGGCTCTCCTTGCAGCTGCTTAGACGCTGGATTTTTTTCGGGTAGTGGAAAACCAGGTAAGCACCGAAGTCCACTTGCCTTTTAA
MYC	8	128750439	128750624	MYC_2	186	58	GCACCAAGACCCCTTTAACTCA	TCGCTCTGCTGCTGCT	GCACCAAGACCCCTTTAACTCAAGACTGCCTCCCGCTTTGTGTGCCCCGCTCCAGCAGCCTCCCGCGACGATGCCCCTCAACGTTAGCTTCACCAACAGGAACTATGACCTCGACTACGACTCGGTGCAGCCGTATTTCTACTGCGACGAGGAGGAGAACTTCTACCAGCAGCAGCAGCAGAGCGA
MYC	8	128750515	128750703	MYC_3	189	60	CTCAACGTTAGCTTCACCAACAG	GCGGCTAGGGGACAGGG	CTCAACGTTAGCTTCACCAACAGGAACTATGACCTCGACTACGACTCGGTGCAGCCGTATTTCTACTGCGACGAGGAGGAGAACTTCTACCAGCAGCAGCAGCAGAGCGAGCTGCAGCCCCCGGCGCCCAGCGAGGATATCTGGAAGAAATTCGAGCTGCTGCCCACCCCGCCCCTGTCCCCTAGCCGC
MYC	8	128750637	128750822	MYC_4	186	68	GGCGCCCAGCGAGGATA	AGCTCGGTCACCATCTCCA	GGCGCCCAGCGAGGATATCTGGAAGAAATTCGAGCTGCTGCCCACCCCGCCCCTGTCCCCTAGCCGCCGCTCCGGGCTCTGCTCGCCCTCCTACGTTGCGGTCACACCCTTCTCCCTTCGGGGAGACAACGACGGCGGTGGCGGGAGCTTCTCCACGGCCGACCAGCTGGAGATGGTGACCGAGCT
MYC	8	128750737	128750924	MYC_5	188	59	GTCACACCCTTCTCCCTTCG	GAGAAGCCGCTCCACATACAG	GTCACACCCTTCTCCCTTCGGGGAGACAACGACGGCGGTGGCGGGAGCTTCTCCACGGCCGACCAGCTGGAGATGGTGACCGAGCTGCTGGGAGGAGACATGGTGAACCAGAGTTTCATCTGCGACCCGGACGACGAGACCTTCATCAAAAACATCATCATCCAGGACTGTATGTGGAGCGGCTTCTC
MYC	8	128750801	128750991	MYC_6	191	59	AGCTGGAGATGGTGACCGAG	GCTGCCGCTGTCTTTGC	AGCTGGAGATGGTGACCGAGCTGCTGGGAGGAGACATGGTGAACCAGAGTTTCATCTGCGACCCGGACGACGAGACCTTCATCAAAAACATCATCATCCAGGACTGTATGTGGAGCGGCTTCTCGGCCGCCGCCAAGCTCGTCTCAGAGAAGCTGGCCTCCTACCAGGCTGCGCGCAAAGACAGCGGCAGC
MYC	8	128750907	128751105	MYC_7	199	67	TATGTGGAGCGGCTTCTCGG	GAGAGGGTAGGGGAAGACCAC	TATGTGGAGCGGCTTCTCGGCCGCCGCCAAGCTCGTCTCAGAGAAGCTGGCCTCCTACCAGGCTGCGCGCAAAGACAGCGGCAGCCCGAACCCCGCCCGCGGCCACAGCGTCTGCTCCACCTCCAGCTTGTACCTGCAGGATCTGAGCGCCGCCGCCTCAGAGTGCATCGACCCCTCGGTGGTCTTCCCCTACCCTCTC
MYC	8	128750982	128751175	MYC_8	194	67	CAGCGGCAGCCCGAAC	GAGAATCCGAGGACGGAGAGAA	CAGCGGCAGCCCGAACCCCGCCCGCGGCCACAGCGTCTGCTCCACCTCCAGCTTGTACCTGCAGGATCTGAGCGCCGCCGCCTCAGAGTGCATCGACCCCTCGGTGGTCTTCCCCTACCCTCTCAACGACAGCAGCTCGCCCAAGTCCTGCGCCTCGCAAGACTCCAGCGCCTTCTCTCCGTCCTCGGATTCTC
MYC	8	128751087	128751281	MYC_9	195	67	GGTCTTCCCCTACCCTCTCAA	GGCGGGCTTCGCTTACC	GGTCTTCCCCTACCCTCTCAACGACAGCAGCTCGCCCAAGTCCTGCGCCTCGCAAGACTCCAGCGCCTTCTCTCCGTCCTCGGATTCTCTGCTCTCCTCGACGGAGTCCTCCCCGCAGGGCAGCCCCGAGCCCCTGGTGCTCCATGAGGAGACACCGCCCACCACCAGCAGCGACTCTGGTAAGCGAAGCCCGCC
MYC	8	128751154	128751352	MYC_10	199	61	TTCTCTCCGTCCTCGGATTCTCT	AGAGTGGCCCGTTAAATAAGCTG	TTCTCTCCGTCCTCGGATTCTCTGCTCTCCTCGACGGAGTCCTCCCCGCAGGGCAGCCCCGAGCCCCTGGTGCTCCATGAGGAGACACCGCCCACCACCAGCAGCGACTCTGGTAAGCGAAGCCCGCCCAGGCCTGTCAAAAGTGGGCGGCTGGATACCTTTCCCATTTTCATTGGCAGCTTATTTAACGGGCCACTCT
MYC	8	128752580	128752764	MYC_11	185	43	TGGTAATTGATTATTTTAATGTAACCTTGCT	GGCTGTGAGGAGGTTTGCTG	TGGTAATTGATTATTTTAATGTAACCTTGCTAAAGGAGTGATTTCTATTTCCTTTCTTAAAGAGGAGGAACAAGAAGATGAGGAAGAAATCGATGTTGTTTCTGTGGAAAAGAGGCAGGCTCCTGGCAAAAGGTCAGAGTCTGGATCACCTTCTGCTGGAGGCCACAGCAAACCTCCTCACAGCC
MYC	8	128752673	128752857	MYC_12	185	57	TGTTGTTTCTGTGGAAAAGAGGC	CCCTCTTGGCAGCAGGATAGT	TGTTGTTTCTGTGGAAAAGAGGCAGGCTCCTGGCAAAAGGTCAGAGTCTGGATCACCTTCTGCTGGAGGCCACAGCAAACCTCCTCACAGCCCACTGGTCCTCAAGAGGTGCCACGTCTCCACACATCAGCACAACTACGCAGCGCCTCCCTCCACTCGGAAGGACTATCCTGCTGCCAAGAGGG
MYC	8	128752764	128752951	MYC_13	188	57	CCACTGGTCCTCAAGAGGTG	CTCTTGACATTCTCCTCGGTGTC	CCACTGGTCCTCAAGAGGTGCCACGTCTCCACACATCAGCACAACTACGCAGCGCCTCCCTCCACTCGGAAGGACTATCCTGCTGCCAAGAGGGTCAAGTTGGACAGTGTCAGAGTCCTGAGACAGATCAGCAACAACCGAAAATGCACCAGCCCCAGGTCCTCGGACACCGAGGAGAATGTCAAGAG
MYC	8	128752876	128753056	MYC_14	181	55	GAGTCCTGAGACAGATCAGCAAC	GGGGCCTTTTCATTGTTTTCCAA	GAGTCCTGAGACAGATCAGCAACAACCGAAAATGCACCAGCCCCAGGTCCTCGGACACCGAGGAGAATGTCAAGAGGCGAACACACAACGTCTTGGAGCGCCAGAGGAGGAACGAGCTAAAACGGAGCTTTTTTGCCCTGCGTGACCAGATCCCGGAGTTGGAAAACAATGAAAAGGCCCC
MYC	8	128752938	128753137	MYC_15	200	50	GAGAATGTCAAGAGGCGAACACA	TCCTCTTCAGAAATGAGCTTTTGC	GAGAATGTCAAGAGGCGAACACACAACGTCTTGGAGCGCCAGAGGAGGAACGAGCTAAAACGGAGCTTTTTTGCCCTGCGTGACCAGATCCCGGAGTTGGAAAACAATGAAAAGGCCCCCAAGGTAGTTATCCTTAAAAAAGCCACAGCATACATCCTGTCCGTCCAAGCAGAGGAGCAAAAGCTCATTTCTGAAGAGGA
MYC	8	128753050	128753249	MYC_16	200	45	AGGCCCCCAAGGTAGTTATCC	GCTCAGGACATTTCTGTTAGAAGG	AGGCCCCCAAGGTAGTTATCCTTAAAAAAGCCACAGCATACATCCTGTCCGTCCAAGCAGAGGAGCAAAAGCTCATTTCTGAAGAGGACTTGTTGCGGAAACGACGAGAACAGTTGAAACACAAACTTGAACAGCTACGGAACTCTTGTGCGTAAGGAAAAGTAAGGAAAACGATTCCTTCTAACAGAAATGTCCTGAGC
HNF4G	8	76452170	76452369	HNF4G_1	200	35	TGCCACTTGTATGTGTGTTTCTA	CCTTCTCCAATTATACTTACTTTTCTTTACA	TGCCACTTGTATGTGTGTTTCTAAATCAATGATGAGGGTATCAGAACCAATACTGGACATGGACATGGCAAATTACAGTGAAGTTTTGGACCCAACTTACACAACTTTGGAGTTTGAAACTATGCAGATTCTATATAATTCAAGTGGTGAGTTATCATCTGTTTATAGATGTAAAGAAAAGTAAGTATAATTGGAGAAGG
HNF4G	8	76455951	76456150	HNF4G_2	200	40	TGAATGGAGTGTTATGAGCCTATAAATAA	TGGATGCCCCATAGTGTTTTC	tgaatggagtgttATGAGCCTATAAATAATTAGTAGGACAATTTAGTCAGGAAATAGTACTAACTCTAACTGTAATCTTCCTTTTTTATTGACAGATAGTTCTGCCCCAGAGACAAGTATGAATACCACAGACAACGGTGTCAACTGTCTGTGTGCTATCTGTGGGGACAGAGCAACAGGAAAACACTATGGGGCATCCA
HNF4G	8	76456083	76456277	HNF4G_3	195	46	CAACGGTGTCAACTGTCTGTGT	CTTTTTGCGTGCCAAACTGAAAC	CAACGGTGTCAACTGTCTGTGTGCTATCTGTGGGGACAGAGCAACAGGAAAACACTATGGGGCATCCAGCTGTGATGGGTGCAAGGGTTTCTTCAGACGCAGCATTCGTAAGAGTCACGTTTATTCTTGCAGGTACTTTAAATGCCCTTTTAGGCAAGTTATCTTTACAGATGTTTCAGTTTGGCACGCAAAAAG
HNF4G	8	76459738	76459917	HNF4G_4	180	31	ACATATTTAAAATCCATTTGTCTGTTTATTTGCT	CCTTCTTTTTTCATTCCCGCTCT	ACATATTTAAAATCCATTTGTCTGTTTATTTGCTTCTTTTGTAAATTATAGTTTTCTGCAAACTGATATATCTTTATGTTATAGGTTCAGTCGGCAATGTGTTGTTGACAAGGACAAAAGGAATCAATGTAGATATTGTCGATTAAGAAAGTGTTTTAGAGCGGGAATGAAAAAAGAAGG
HNF4G	8	76459835	76460024	HNF4G_5	190	28	TGTGTTGTTGACAAGGACAAAAGG	tgaggaaaatTAGAACTCATGTAAAAAGT	TGTGTTGTTGACAAGGACAAAAGGAATCAATGTAGATATTGTCGATTAAGAAAGTGTTTTAGAGCGGGAATGAAAAAAGAAGGTAATAATAATGATGATGATAATTAACATTATTGATGAAAAGTGATAAACATACACACACATTCTCATTGATTAGTATAACTTTTTACATGAGTTCTAattttcctca
HNF4G	8	76463573	76463733	HNF4G_6	161	44	ACATACACTAAAGAGAAGTGCTCAA	GTACCTGGCGAGACCGAAC	ACATACACTAAAGAGAAGTGCTCAATAAATACTGTGTTTTTTCCCCCTAGCTGTACAAAATGAACGTGACAGAATAAGCACCAGAAGAAGCACATTTGATGGCAGCAACATCCCCTCCATTAACACACTGGCACAAGCTGAAGTTCGGTCTCGCCAGGTAC
HNF4G	8	76463616	76463795	HNF4G_7	180	47	CCCCTAGCTGTACAAAATGAACG	AGCATGATGCCTACATGGACATT	CCCCTAGCTGTACAAAATGAACGTGACAGAATAAGCACCAGAAGAAGCACATTTGATGGCAGCAACATCCCCTCCATTAACACACTGGCACAAGCTGAAGTTCGGTCTCGCCAGGTACCTGTGGCACGGCAGCATCAAACCCTATTTAATAAAATCAAATGTCCATGTAGGCATCATGCT
HNF4G	8	76465158	76465341	HNF4G_8	184	34	ACTGTAACAACAATAGTGCCTACTTC	TCACCAATACTTGCAATTTTCTTAACG	ACTGTAACAACAATAGTGCCTACTTCTATGGCCTTTACTTATCATAGTCAAAAGAAAAAAAGGGGAATGTTGGCCATCTATTATTTTAAATGATAATATAATGCTTTTCTTAATACTAGATCTCAGTCTCAAGCCCTGGGTCAAGCACTGACATAAACGTTAAGAAAATTGCAAGTATTGGTGA
HNF4G	8	76465288	76465483	HNF4G_9	196	37	AAGCCCTGGGTCAAGCAC	GCAAAGTTCAAGAAGCATTTTTAAAGCA	AAGCCCTGGGTCAAGCACTGACATAAACGTTAAGAAAATTGCAAGTATTGGTGATGTCTGTGAATCTATGAAACAGCAGCTCTTAGTCTTGGTGGAATGGGCTAAATATATTCCTGCCTTCTGTGAATTACCATTGGATGATCAGGTACACATTTAAAACTTTATAAATGCTTTAAAAATGCTTCTTGAACTTTGC
HNF4G	8	76468111	76468262	HNF4G_10	152	36	ACAAAAAGTCCCAGGCTTAAAGAAC	CTCCAAGCAGTAAGTGCTCCC	ACAAAAAGTCCCAGGCTTAAAGAACACTCTAAGTTAACAAGACTCATGTCATCttttaatcattatatattataattaattGTTAAACTGAGAATTTTTCATTAAGGTGGCACTGTTGAGAGCTCACGCAGGGGAGCACTTACTGCTTGGAG
HNF4G	8	76468211	76468408	HNF4G_11	198	35	ATTAAGGTGGCACTGTTGAGAGC	TGCCAGTGTCTGTAAATACTTGGT	ATTAAGGTGGCACTGTTGAGAGCTCACGCAGGGGAGCACTTACTGCTTGGAGCTACAAAGAGATCCATGATGTATAAAGATATTTTGCTTTTGGGTAAGTTTTTTTTTTTTAATTTAAGAAGAAATTATGCATATTTTATTCTTGCAATATTATACAGGGTCTGTTCTGTATGTACCAAGTATTTACAGACACTGGCA
HNF4G	8	76470691	76470874	HNF4G_12	184	40	CTGACAATTTGGGGAGACAGGTG	AGCATACTCATTGTCATCAATCTGG	CTGACAATTTGGGGAGACAGGTGGttattttgttttgttttgttttgttttCTCTCTCATAGGAAACAACTATGTTATTCACCGCAACAGCTGTGAAGTTGAGATTAGCCGTGTGGCCAATCGTGTTCTAGATGAGCTGGTTAGACCATTTCAAGAAATCCAGATTGATGACAATGAGTATGCT
HNF4G	8	76470743	76470924	HNF4G_13	182	38	TCTCTCATAGGAAACAACTATGTTATTCA	TGGAATTTTGAAAACCAACCTGGA	TCTCTCATAGGAAACAACTATGTTATTCACCGCAACAGCTGTGAAGTTGAGATTAGCCGTGTGGCCAATCGTGTTCTAGATGAGCTGGTTAGACCATTTCAAGAAATCCAGATTGATGACAATGAGTATGCTTGTTTAAAGGCAATTGTATTTTTTGATCCAGGTTGGTTTTCAAAATTCCA
HNF4G	8	76470849	76471028	HNF4G_14	180	29	TCCAGATTGATGACAATGAGTATGC	AGGAATAAGAGAGGCAGTGTACAGA	TCCAGATTGATGACAATGAGTATGCTTGTTTAAAGGCAATTGTATTTTTTGATCCAGGTTGGTTTTCAAAATTCCACTAGAGAATTAATATAATAAAAATTGAACTACTTTTCAATATTAGAATATTTATTGTCTCACACTGTAATTAGGTTAAATCTGTACACTGCCTCTCTTATTCCT
HNF4G	8	76470969	76471164	HNF4G_15	196	43	GAATATTTATTGTCTCACACTGTAATTAGGTT	GGAGCAGAAGCAACTCTCCAAA	GAATATTTATTGTCTCACACTGTAATTAGGTTAAATCTGTACACTGCCTCTCTTATTCCTTTGTTAGATGCAAAAGGGCTAAGCGATCCAGTAAAAATTAAGAACATGAGGTTCCAAGTGCAGATCGGTTTGGAGGACTACATCAATGATCGGCAGTATGACTCCCGGGGGAGGTTTGGAGAGTTGCTTCTGCTCC
HNF4G	8	76471089	76471278	HNF4G_16	190	45	CAGATCGGTTTGGAGGACTACAT	ACTCACCACCTAATAGCATTTCCT	CAGATCGGTTTGGAGGACTACATCAATGATCGGCAGTATGACTCCCGGGGGAGGTTTGGAGAGTTGCTTCTGCTCCTGCCCACACTGCAGAGCATCACGTGGCAAATGATTGAGCAAATACAGTTTGTTAAACTTTTTGGGATGGTTAAAATTGACAATCTACTTCAGGAAATGCTATTAGGTGGTGAGT
HNF4G	8	76471184	76471381	HNF4G_17	198	31	CACGTGGCAAATGATTGAGCAAA	TCACAGCAACTTCAGTAGATGAAT	CACGTGGCAAATGATTGAGCAAATACAGTTTGTTAAACTTTTTGGGATGGTTAAAATTGACAATCTACTTCAGGAAATGCTATTAGGTGGTGAGTACATTGAATAATTTCTACTTTATTGATTAGAATCACACTAAATATAAGTTTGACCTACTGATTTTTTTGTCCATATTTAATTCATCTACTGAAGTTGCTGTGA
HNF4G	8	76472507	76472689	HNF4G_18	183	39	ACATTTGTTTCAAGGTAAACTTGCTGT	CATGAACCAGTGTTGACATGGGA	ACATTTGTTTCAAGGTAAACTTGCTGTTCCTGATTAAATATCACTAACACAGCATCTTTTTATCTTTTGTAGGGGCTTCCAATGATGGCAGTCATCTCCATCATCCAATGCATCCACATTTGTCTCAAGACCCATTAACTGGACAAACTATACTTTTAGGTCCCATGTCAACACTGGTTCATG
HNF4G	8	76472583	76472768	HNF4G_19	186	39	TTCCAATGATGGCAGTCATCTCC	CCCACAATTCCACTTTTTCTTGGG	TTCCAATGATGGCAGTCATCTCCATCATCCAATGCATCCACATTTGTCTCAAGACCCATTAACTGGACAAACTATACTTTTAGGTCCCATGTCAACACTGGTTCATGCAGACCAGATCTGTAAGTTTATAGACTACTTTTCAACCAAGATATTTCTTAATTACCCAAGAAAAAGTGGAATTGTGGG
HNF4G	8	76476162	76476360	HNF4G_20	199	45	GGAAGACTGACTGCCACCATTAG	TGTAGTGCCGTTCTGAAGTAAACA	GGAAGACTGACTGCCACCATTAGACTCAATTCTCTGATTCTTTTTCAGCAACTCCTGAAACCCCACTCCCTTCCCCACCACAAGGCTCTGGGCAAGAACAGTACAAAATAGCTGCAAACCAAGCATCAGTCATTTCACACCAGCATCTCTCCAAACAAAAGCAATTGTGAAAATGTGTTTACTTCAGAACGGCACTACA
CDKN2A	9	21968115	21968301	CDKN2A_1	187	52	ATGAAAACTACGAAAGCGGGGTG	ATGTGCCACACATCTTTGACCT	ATGAAAACTACGAAAGCGGGGTGGGTTGTGGCGGGGGCAGTTGTGGCCCTGTAGGACCTTCGGTGACTGATGATCTAAGTTTCCCGAGGTTTCTCAGAGCCTCTCTGGTTCTTTCAATCGGGGATGTCTGCAGAGGGCAGAAAGAAAACAGGCGTTAGAAACCTGAGGTCAAAGATGTGTGGCACAT
CDKN2A	9	21968657	21968838	CDKN2A_2	182	52	AGCCAGCTTGCGATAACCAAA	CGCAACGAGATTAGAGAGGAAGG	AGCCAGCTTGCGATAACCAAAGGGCGCCTCAGGCTCTGGCGCTCCTCGGCGGAATCCCGTAGCTTCCCTACGCATGCCTGCTTCTACAAACCCACAAATGGTTTCCGATCATTTCTGAAACAAAATGGATGCTCATTTATTCATGTGCTCTGGCTTCTGCCTTCCTCTCTAATCTCGTTGCG
CDKN2A	9	21970819	21971012	CDKN2A_3	194	59	GCTGAACTTTCTGTGCTGGAAAA	GACCTGGCTGAGGAGCTG	GCTGAACTTTCTGTGCTGGAAAATGAATGCTCTGAGCTTTGGAAGCTCTCAGGGTACAAATTCTCAGATCATCAGTCCTCACCTGAGGGACCTTCCGCGGCATCTATGCGGGCATGGTTACTGCCTCTGGTGCCCCCCGCAGCCGCGCGCAGGTACCGTGCGACATCGCGATGGCCCAGCTCCTCAGCCAGGTC
CDKN2A	9	21970919	21971084	CDKN2A_4	166	72	CATCTATGCGGGCATGGTTACT	GACACGCTGGTGGTGCT	CATCTATGCGGGCATGGTTACTGCCTCTGGTGCCCCCCGCAGCCGCGCGCAGGTACCGTGCGACATCGCGATGGCCCAGCTCCTCAGCCAGGTCCACGGGCAGACGGCCCCAGGCATCGCGCACGTCCAGCCGCGCCCCGGCCCGGTGCAGCACCACCAGCGTGTC
CDKN2A	9	21970997	21971176	CDKN2A_5	180	75	GCTCCTCAGCCAGGTCCA	AGCTGCTGCTGCTCCAC	GCTCCTCAGCCAGGTCCACGGGCAGACGGCCCCAGGCATCGCGCACGTCCAGCCGCGCCCCGGCCCGGTGCAGCACCACCAGCGTGTCCAGGAAGCCCTCCCGGGCAGCGTCGTGCACGGGTCGGGTGAGAGTGGCGGGGTCGGCGCAGTTGGGCTCCGCGCCGTGGAGCAGCAGCAGCT
CDKN2A	9	21971134	21971326	CDKN2A_6	193	64	GGGTCGGCGCAGTTGG	TAATTAGACACCTGGGGCTTGTG	GGGTCGGCGCAGTTGGGCTCCGCGCCGTGGAGCAGCAGCAGCTCCGCCACTCGGGCGCTGCCCATCATCATGACCTGCCAGAGAGAACAGAATGGTCAGAGCCAGGGTGGGGGCCGGCATGACGGAAAGGAAGCTTGTGTAGAGCCCCCTCACCGCCAAGCAGACCCCCACACAAGCCCCAGGTGTCTAATTA
CDKN2A	9	21974421	21974620	CDKN2A_7	200	56	TGTTCCCCCCTTCAGATCTTCTC	GTTTGCAGGGGAATTGGAATCAG	TGTTCCCCCCTTCAGATCTTCTCAGCATTCGAGAGATCTGTACGCGCGTGGCTCCTCATTCCTCTTCCTTGGCTTCCCAAGCCCCCAGGGCGTCGCCAGGAGGAGGTCTGTGATTACAAACCCCTTCTGAAAACTCCCCAGGAAGCCTCCCCTTTTTCCGGAGAATCGAAGCGCTACCTGATTCCAATTCCCCTGCAAAC
CDKN2A	9	21974536	21974716	CDKN2A_8	181	59	ACAAACCCCTTCTGAAAACTCCC	gcCCAACGCACCGAATAGTTA	ACAAACCCCTTCTGAAAACTCCCCAGGAAGCCTCCCCTTTTTCCGGAGAATCGAAGCGCTACCTGATTCCAATTCCCCTGCAAACTTCGTCCTCCAGAGTCGCCCGCCATCCCCTGCTCCCGCTGCAGACCCTCTACCCACCTGGATCGGCCTCCGACCGTAACTATTCGGTGCGTTGGgc
CDKN2A	9	21974607	21974806	CDKN2A_9	200	70	ATTCCCCTGCAAACTTCGT	CAGCATGGAGCCTTCGG	ATTCCCCTGCAAACTTCGTCCTCCAGAGTCGCCCGCCATCCCCTGCTCCCGCTGCAGACCCTCTACCCACCTGGATCGGCCTCCGACCGTAACTATTCGGTGCGTTGGgcagcgcccccgcctccagcagcgcccgcacctccTCTACCCGACCCCGGGCCGCGGCCGTGGCCAGCCAGTCAGCCGAAggctccatgctg
CDKN2A	9	21974684	21974869	CDKN2A_10	186	75	GGCCTCCGACCGTAACTATTC	CTGCGGAGAGGGGGAGAG	GGCCTCCGACCGTAACTATTCGGTGCGTTGGgcagcgcccccgcctccagcagcgcccgcacctccTCTACCCGACCCCGGGCCGCGGCCGTGGCCAGCCAGTCAGCCGAAggctccatgctgctccccgccgccggctccatgctgctccccgccgcccgctgcctgctctccccCTCTCCGCAG
CDKN2A	9	21994084	21994278	CDKN2A_11	195	64	ACCAAACAAAACAAGTGCCGAAT	CGCGAGTGAGGGTTTTCGT	ACCAAACAAAACAAGTGCCGAATGCGCCCCGGACTTTTCGAGGGCCTTTCCTACCTGGTCTTCTAGGAAGCGGCTGCTGCCCTAGACGCTGGCTCCTCAGTAGCATCAGCACGAGGGCCACAGCGGCGGGCGCCCCTGGCGCTGCCCACTCCCCCGTGAGCCGCGGGATGTGAACCACGAAAACCCTCACTCGCG
CDKN2A	9	21994172	21994357	CDKN2A_12	186	71	CTGGCTCCTCAGTAGCATCAG	GAGCTCGGCCCTGGAG	CTGGCTCCTCAGTAGCATCAGCACGAGGGCCACAGCGGCGGGCGCCCCTGGCGCTGCCCACTCCCCCGTGAGCCGCGGGATGTGAACCACGAAAACCCTCACTCGCGGCGGGCCGCACGCGCGCCGAATCCGGAGGGTCACCAAGAACCTGCGCACCATGTTCTCGCCGCCTCCAGGGCCGAGCTC
CDKN2B	9	22008685	22008879	CDKN2B_1	195	69	GGAGACTCCTGTACAAATCTACATCG	GACTAGTGGAGAAGGTGCGACAG	GGAGACTCCTGTACAAATCTACATCGGCGATCTAGGTTCCAGCCCCGATCCGCCGAGGCCGCGCCCCGCGTTCGCGCGCCCCCTGCCGGCGAGGCCCTGGGGCCCCAGCTACCTGGATCGCGCGCCTCCCGAAACGGTTGACTCCGTTGGGATCCGCGCCGGCTTCCAGGAGCTGTCGCACCTTCTCCACTAGTC
CDKN2B	9	22008810	22009008	CDKN2B_2	199	67	CTCCCGAAACGGTTGACTCC	TAAGTTTACGGCCAACGGTGGAT	CTCCCGAAACGGTTGACTCCGTTGGGATCCGCGCCGGCTTCCAGGAGCTGTCGCACCTTCTCCACTAGTCCCCGCGCCGCGGCGCTGGCCAGACCCTCATCGCTGCCGCCCCCACTGGGCATGCCCTTGTTCTCCTCGCGCATTCCGCAGCCCCCAGACGCGCAGCGGCCCGGATAATCCACCGTTGGCCGTAAACTTA

## Sheet: TableS2
Table S2. Assay design and coverage metrics for 38 genes near breast cancer GWAS hits. Callable loci are defined as those with at least 30x coverage with a minimum base quality score of 20.
Gene	Target Length (bp)	Number of Amplicons	Designed Coverage	Median Per-Sample Target Coverage	Median Callable Loci
C6ORF211	1326	14	1	99.78	0.786576
CASP8	1687	21	0.998	350.82	0.998222
CCDC170	2148	26	1	290.06	0.99581
CCND1	888	11	1	410.89	0.976351
CDCA7	1353	20	1	271.49	0.935698
CDKN2A	880	12	1	276.52	0.995
CDKN2B	414	2	1	276.52	0.995
CDYL2	1521	17	1	402.34	0.983563
COX11	924	11	1	212.38	0.899216
DCLRE1B	1599	16	1	455.14	0.999375
DNAJC1	1665	23	0.995	238.1	0.84024
EGOT	1462	16	1	311.4	1
ESR1	1788	22	1	429.04	0.998322
EXO1	2541	30	1	258.97	0.934671
FGFR2	2710	35	1	287.18	0.999631
FOXQ1	1212	11	0.856	66.92	0.334983
FTO	1518	18	0.987	355.38	0.962451
HNF4G	1338	20	1	215.67	0.892377
IGFBP5	819	11	1	560.04	0.948718
MAP3K1	4539	55	1	239.59	0.882133
MDM4	1473	20	0.998	305.98	0.976239
MKL1	2796	32	1	469.56	0.979971
MRPS30	1320	13	1	243.1	0.99697
MYC	1365	16	1	401.8	0.981685
NEK10	2139	35	0.997	219.55	0.904161
NRBF2	864	10	1	145.21	0.868056
NTN4	1887	22	1	398.13	0.987811
PDE4D	3350	44	0.995	256.95	0.849851
PTH1R	1782	21	1	392.47	0.965208
PTHLH	538	7	1	426.86	1
RAD51B	1189	19	1	301.73	0.867956
RNF115	915	14	1	328.58	0.978142
TBX3	2232	24	1	309.86	0.869176
TERT	3399	37	1	425.38	0.747149
TET2	6098	65	1	384.31	0.990981
TGFBR2	1779	18	1	400.88	1
TOX3	1806	20	1	341.6	1
ZNF365	2101	26	1	374.55	0.985245

## Sheet: TableS3
Table S3. Variant totals and predicted effect breakdown for the BC GWAS genes overall (upper) and for rare variants only (lower).
All Variants
	Total Truncating	Canonical Splice	Frameshift	Stop Gained	Missense	Synonymous	Intron	Other	Total
C6orf211	9	0	5	4	39	14	0	5	67
CASP8	9	1	5	2	49	19	9	5	90
CCDC170	10	1	4	4	78	31	0	12	130
CCND1	1	0	1	0	25	20	0	4	50
CDCA7	1	0	0	1	38	18	0	2	59
CDKN2A	2	0	1	1	35	15	11	3	66
CDKN2B	1	0	0	1	10	1	6	0	18
CDYL2	2	0	1	1	67	53	0	4	126
COX11	4	0	3	1	22	18	0	6	50
DCLRE1B	3	0	1	1	65	24	0	5	96
DNAJC1	3	0	3	0	49	22	0	2	76
EGOT	0	0	0	0	0	0	117	0	117
ESR1	0	0	0	0	62	44	0	6	112
EXO1	14	4	5	4	112	38	0	5	168
FGFR2	2	1	1	0	62	51	7	12	134
FOXQ1	4	0	2	2	18	9	0	0	31
FTO	4	0	1	3	60	23	0	6	93
HNF4G	0	0	0	0	44	19	0	3	66
IGFBP5	0	0	0	0	32	18	0	2	52
MAP3K1	6	3	2	1	111	62	0	10	189
MDM4	0	0	0	0	41	23	0	6	70
MKL1	3	0	0	2	145	93	0	10	250
MRPS30	5	1	1	3	58	21	0	3	87
MYC	0	0	0	0	45	28	0	6	79
NEK10	7	1	2	3	58	29	0	15	108
NRBF2	1	0	0	1	28	4	0	5	38
NTN4	3	0	0	3	69	33	0	3	108
PDE4D	2	0	0	2	54	33	32	6	127
PTH1R	1	0	1	0	63	29	0	9	102
PTHLH	1	0	1	0	8	6	0	1	16
RAD51B	4	3	0	1	47	18	5	6	80
RNF115	1	0	1	0	42	9	0	5	57
TBX3	1	0	1	0	55	45	0	5	106
TERT	1	1	0	0	88	101	0	11	201
TET2	20	2	13	5	174	64	6	11	275
TGFBR2	3	0	1	2	43	38	0	6	90
TOX3	1	0	0	1	63	42	6	5	117
ZNF365	2	0	0	2	56	25	52	3	138
Total	131	18	56	51	2115	1140	251	208	3839
Rare Variants: ExAC European (Exonic) or SEARCH (Non-Coding) Frequency <0.1%
	Total Truncating	Canonical Splice	Frameshift	Stop Gained	Missense	Synonymous	Intron	Other	Total
C6orf211	9	0	5	4	36	13	0	5	63
CASP8	8	1	5	2	45	17	9	3	82
CCDC170	10	1	4	4	66	28	0	10	113
CCND1	1	0	1	0	25	19	0	3	48
CDCA7	1	0	0	1	38	16	0	2	57
CDKN2A	2	0	1	1	34	15	10	3	64
CDKN2B	1	0	0	1	10	1	6	0	18
CDYL2	2	0	1	1	64	47	0	4	117
COX11	4	0	3	1	22	17	0	5	48
DCLRE1B	3	0	1	1	62	22	0	5	91
DNAJC1	3	0	3	0	48	20	0	1	72
EGOT	0	0	0	0	0	0	106	0	106
ESR1	0	0	0	0	58	37	0	6	101
EXO1	13	3	5	4	91	37	0	5	145
FGFR2	2	1	1	0	60	46	7	11	126
FOXQ1	4	0	2	2	17	8	0	0	29
FTO	4	0	1	3	56	22	0	6	88
HNF4G	0	0	0	0	42	16	0	3	61
IGFBP5	0	0	0	0	30	14	0	2	46
MAP3K1	6	3	2	1	106	54	0	10	176
MDM4	0	0	0	0	38	19	0	6	63
MKL1	3	0	0	2	139	85	0	9	235
MRPS30	5	1	1	3	52	20	0	3	80
MYC	0	0	0	0	41	27	0	6	74
NEK10	7	1	2	3	54	25	0	13	98
NRBF2	1	0	0	1	26	4	0	4	35
NTN4	3	0	0	3	64	30	0	3	100
PDE4D	2	0	0	2	54	32	31	5	124
PTH1R	1	0	1	0	59	25	0	8	93
PTHLH	1	0	1	0	8	6	0	1	16
RAD51B	4	3	0	1	43	18	5	5	75
RNF115	1	0	1	0	42	8	0	5	56
TBX3	1	0	1	0	55	40	0	5	101
TERT	1	1	0	0	86	90	0	11	188
TET2	20	2	13	5	160	60	6	11	257
TGFBR2	3	0	1	2	39	35	0	5	82
TOX3	1	0	0	1	59	35	6	5	106
ZNF365	2	0	0	2	53	23	49	3	130
Total	129	17	56	51	1982	1031	235	192	3564

## Sheet: TableS4
Table S4. All variants discovered in this study with VEP annotations and case/control allele counts.
Chr	Pos	Ref	Alt	Symbol	KnownVar	Consequence	Gene	HVGS.c	HVGS.p	SIFT	PolyPhen	CADD	ExAC_EUR_Carrier_Frequency	EastAnglian_Carrier_Frequency	Case_Hom	Case_Het	Case_Carriers	Case_Missing	Control_Hom	Control_Het	Control_Carriers	Control_Missing
chr16	52473130	T	C	TOX3	rs745627061	3_prime_UTR_variant	ENSG00000103460	ENST00000219746.9:c.*7A>G	NA	NA	NA	0.002	0	5.24769e-05	0	0	0	0	0	1	1	0
chr16	52473135	C	A	TOX3	NA	3_prime_UTR_variant	ENSG00000103460	ENST00000219746.9:c.*2G>T	NA	NA	NA	6.045	0	5.24769e-05	0	0	0	0	0	1	1	0
chr16	54145830	G	A	FTO	NA	3_prime_UTR_variant	ENSG00000140718	ENST00000471389.1:c.*3G>A	NA	NA	NA	15.29	0	5.24769e-05	0	1	1	0	0	0	0	0
chr17	53038620	A	T	COX11	NA	3_prime_UTR_variant	ENSG00000141198	ENST00000575882.1:c.*26A>T	NA	NA	NA	11.48	0	5.24769e-05	0	1	1	0	0	0	0	0
chr17	53038641	C	A	COX11	NA	3_prime_UTR_variant	ENSG00000141198	ENST00000575882.1:c.*47C>A	NA	NA	NA	9.551	0	5.24769e-05	0	0	0	0	0	1	1	0
chr17	53038649	C	T	COX11	rs550630307	3_prime_UTR_variant	ENSG00000141198	ENST00000575882.1:c.*55C>T	NA	NA	NA	0.494	0	5.24769e-05	0	1	1	0	0	0	0	0
chr3	27257319	C	G	NEK10	rs368710964	3_prime_UTR_variant	ENSG00000163491	ENST00000341435.5:c.*4G>C	NA	NA	NA	13	0	5.24769e-05	0	1	1	0	0	0	0	0
chr10	123239119	C	T	FGFR2	NA	3_prime_UTR_variant	ENSG00000066468	NA	NA	NA	NA	0.006	0	5.24769e-05	0	0	0	1	0	1	1	0
chr10	123239138	C	A	FGFR2	NA	3_prime_UTR_variant	ENSG00000066468	NA	NA	NA	NA	0.027	0	5.24769e-05	0	1	1	1	0	0	0	0
chr16	80638284	C	T	CDYL2	NA	3_prime_UTR_variant	ENSG00000166446	ENST00000570137.2:c.*1G>A	NA	NA	NA	7.467	0	5.24769e-05	0	0	0	1	0	1	1	1
chr5	1253839	G	A	TERT	NA	3_prime_UTR_variant	ENSG00000164362	ENST00000310581.5:c.*4C>T	NA	NA	NA	5.136	0	5.24769e-05	0	0	0	1	0	1	1	1
chr5	56189510	A	G	MAP3K1	rs751324883	3_prime_UTR_variant	ENSG00000095015	ENST00000399503.3:c.*3A>G	NA	NA	NA	0.165	0	5.24769e-05	0	1	1	1	0	0	0	0
chr5	56189511	A	G	MAP3K1	NA	3_prime_UTR_variant	ENSG00000095015	ENST00000399503.3:c.*4A>G	NA	NA	NA	0.011	0	5.24769e-05	0	1	1	1	0	0	0	0
chr8	128753205	G	A	MYC	NA	3_prime_UTR_variant	ENSG00000136997	ENST00000377970.2:c.*1G>A	NA	NA	NA	8.189	0	5.24769e-05	0	1	1	1	0	0	0	0
chr8	128753206	G	C	MYC	NA	3_prime_UTR_variant	ENSG00000136997	ENST00000377970.2:c.*2G>C	NA	NA	NA	0.046	0	5.24769e-05	0	1	1	1	0	0	0	0
chr9	21968222	G	C	CDKN2A	NA	3_prime_UTR_variant	ENSG00000147889	ENST00000498124.1:c.*170C>G	NA	NA	NA	1.767	0.000119868	0.000104954	0	1	1	1	0	1	1	0
chr16	80638283	C	T	CDYL2	rs371577791	3_prime_UTR_variant	ENSG00000166446	ENST00000570137.2:c.*2G>A	NA	NA	NA	8.473	0.00029967	0.000104954	0	0	0	1	0	2	2	1
chr10	123239120	G	A	FGFR2	rs764231570	3_prime_UTR_variant	ENSG00000066468	NA	NA	NA	NA	0.028	0	0.000104954	0	2	2	2	0	0	0	0
chr5	44815310	C	G	MRPS30	rs561350110	3_prime_UTR_variant	ENSG00000112996	ENST00000507110.1:c.*6C>G	NA	NA	NA	2.614	0	0.000104954	0	2	2	402	0	0	0	17
chr10	123239089	T	C	FGFR2	rs577983786	3_prime_UTR_variant	ENSG00000066468	NA	NA	NA	NA	11.05	0	0.000157431	0	2	2	1	0	1	1	0
chr10	123239147	T	C	FGFR2	NA	3_prime_UTR_variant	ENSG00000066468	NA	NA	NA	NA	0.003	0	0.000157431	0	0	0	1	0	3	3	0
chr5	44815306	A	G	MRPS30	rs747626902	3_prime_UTR_variant	ENSG00000112996	ENST00000507110.1:c.*2A>G	NA	NA	NA	6.081	0	0.000157431	0	0	0	418	0	3	3	17
chr17	53038684	A	G	COX11	NA	3_prime_UTR_variant	ENSG00000141198	ENST00000575882.1:c.*90A>G	NA	NA	NA	5.795	0	0.000209908	0	2	2	0	0	2	2	0
chr10	123239187	G	A	FGFR2	rs4647917	3_prime_UTR_variant	ENSG00000066468	NA	NA	NA	NA	0.166	0.000149835	0.000209908	0	3	3	49	0	1	1	13
chr17	53038654	A	C	COX11	rs1802212	3_prime_UTR_variant	ENSG00000141198	ENST00000575882.1:c.*60A>C	NA	NA	NA	2.439	0.0560084	0.468042	998	5215	6213	1	501	2205	2706	0
chr10	123239112	G	A	FGFR2	rs1047057,COSM147070	3_prime_UTR_variant	ENSG00000066468	NA	NA	NA	NA	9.665	0.107761	0.804314	4194	6730	10924	1	1696	2707	4403	1
chr10	64893229	C	T	NRBF2	NA	5_prime_UTR_variant	ENSG00000148572	ENST00000277746.6:c.-2C>T	NA	NA	NA	20.8	0	5.24769e-05	0	1	1	0	0	0	0	1
chr12	115121006	C	A	TBX3	rs772362699,rs144772866	5_prime_UTR_variant	ENSG00000135111	ENST00000257566.3:c.-1G>T	NA	NA	NA	16.01	3e-05	5.24769e-05	0	0	0	0	0	1	1	0
chr16	53738090	T	C	FTO	NA	5_prime_UTR_variant	ENSG00000140718	ENST00000471389.1:c.-7T>C	NA	NA	NA	17.06	0	5.24769e-05	0	1	1	2	0	0	0	0
chr6	151773674	G	A	C6orf211	rs752650191	5_prime_UTR_variant	ENSG00000146476	ENST00000367294.3:c.-7G>A	NA	NA	NA	8.792	0	5.24769e-05	0	1	1	46	0	0	0	2
chr6	151773677	A	G	C6orf211	rs377365677	5_prime_UTR_variant	ENSG00000146476	ENST00000367294.3:c.-4A>G	NA	NA	NA	3.524	0	5.24769e-05	0	1	1	49	0	0	0	5
chr1	145611238	A	C	RNF115	rs782517738	5_prime_UTR_variant	ENSG00000121848	ENST00000369291.5:c.-2A>C	NA	NA	NA	15.11	0	5.24769e-05	0	1	1	58	0	0	0	83
chr6	151815260	C	G	CCDC170	NA	5_prime_UTR_variant	ENSG00000120262	ENST00000239374.7:c.-4C>G	NA	NA	NA	10.35	0	5.24769e-05	0	0	0	629	0	1	1	649
chr12	115121006	C	G	TBX3	rs772362699,rs144772866	5_prime_UTR_variant	ENSG00000135111	ENST00000257566.3:c.-1G>C	NA	NA	NA	14.02	0.000149835	0.000104954	0	1	1	0	0	1	1	0
chr1	114448204	C	T	DCLRE1B	NA	5_prime_UTR_variant	ENSG00000118655	ENST00000369563.3:c.-5C>T	NA	NA	NA	9.431	0	0.000104954	0	1	1	46	0	1	1	2
chr22	40859232	G	A	MKL1	rs374067426	5_prime_UTR_variant	ENSG00000196588	ENST00000355630.3:c.-1C>T	NA	NA	NA	19.31	8.99e-05	0.000209908	0	3	3	1	0	1	1	0
chr12	28122428	C	T	PTHLH	rs146647632	5_prime_UTR_variant	ENSG00000087494	ENST00000395872.1:c.-1G>A	NA	NA	NA	13.98	0.00029967	0.000419815	0	6	6	27	0	2	2	1178
chr1	242024007	G	T	EXO1	NA	canonical_splice	ENSG00000174371	ENST00000366548.3:c.944+1G>T	NA	NA	NA	26.6	0	5.24769e-05	0	1	1	0	0	0	0	1
chr5	1272299	C	G	TERT	NA	canonical_splice	ENSG00000164362	ENST00000310581.5:c.2382+1G>C	NA	NA	NA	23	0	5.24769e-05	0	1	1	0	0	0	0	0
chr5	44815013	A	G	MRPS30	rs749918126	canonical_splice	ENSG00000112996	ENST00000507110.1:c.1031-2A>G	NA	NA	NA	24.7	0	5.24769e-05	0	0	0	0	0	1	1	1
chr5	56171138	G	A	MAP3K1	NA	canonical_splice	ENSG00000095015	ENST00000399503.3:c.1965+1G>A	NA	NA	NA	26.1	0	5.24769e-05	0	1	1	0	0	0	0	0
chr5	56171138	G	C	MAP3K1	NA	canonical_splice	ENSG00000095015	ENST00000399503.3:c.1965+1G>C	NA	NA	NA	25.4	0	5.24769e-05	0	1	1	0	0	0	0	0
chr14	68301915	T	A	RAD51B	rs774860546	canonical_splice	ENSG00000182185	ENST00000487270.1:c.315+2T>A	NA	NA	NA	25	3e-05	5.24769e-05	0	1	1	0	0	0	0	0
chr6	151917713	G	A	CCDC170	rs779315882	canonical_splice	ENSG00000120262	ENST00000239374.7:c.1710+1G>A	NA	NA	NA	26.1	3e-05	5.24769e-05	0	1	1	0	0	0	0	1
chr14	68878245	G	A	RAD51B	NA	canonical_splice	ENSG00000182185	ENST00000487270.1:c.957+1G>A	NA	NA	NA	26.3	0	5.24769e-05	0	1	1	1	0	0	0	0
chr14	69061201	G	A	RAD51B	rs747491614	canonical_splice	ENSG00000182185	ENST00000487270.1:c.1037-1G>A	NA	NA	NA	5.081	0	5.24769e-05	0	1	1	1	0	0	0	0
chr1	242035581	G	T	EXO1	NA	canonical_splice	ENSG00000174371	ENST00000366548.3:c.1514+1G>T	NA	NA	NA	24.2	0	5.24769e-05	0	0	0	2	0	1	1	0
chr2	202139610	A	AG	CASP8	NA	canonical_splice	ENSG00000064012	ENST00000358485.4:c.775dupG	ENSP00000351273.4:p.Glu259GlyfsTer18	NA	NA	14.45	0	5.24769e-05	0	0	0	2	0	1	1	0
chr4	106164084	GGTAA	G	TET2	NA	canonical_splice	ENSG00000168769	ENST00000540549.1:c.3594+3_3594+6delAAGT	NA	NA	NA	27	0	5.24769e-05	0	1	1	2	0	0	0	1
chr5	56168550	G	T	MAP3K1	NA	canonical_splice	ENSG00000095015	ENST00000399503.3:c.1505+1G>T	NA	NA	NA	25.9	0	5.24769e-05	0	1	1	11	0	0	0	1
chr1	242035332	A	G	EXO1	NA	canonical_splice	ENSG00000174371	ENST00000366548.3:c.1268-2A>G	NA	NA	NA	23.2	0	5.24769e-05	0	1	1	61	0	0	0	12
chr3	27332883	T	A	NEK10	NA	canonical_splice	ENSG00000163491	ENST00000341435.5:c.1477-2A>T	NA	NA	NA	23.4	0	5.24769e-05	0	1	1	92	0	0	0	20
chr4	106164085	G	GT	TET2	NA	canonical_splice	ENSG00000168769	ENST00000540549.1:c.3594+2dupT	NA	NA	NA	25.1	0	0.000104954	0	1	1	2	0	1	1	1
chr10	123274629	T	C	FGFR2	rs759078695,COSM36911,COSM1346251,COSM1346252,COSM1346250,COSM1346249	canonical_splice	ENSG00000066468	ENST00000457416.2:c.1290+2A>G	NA	NA	NA	24.9	3e-05	0.000157431	0	1	1	0	0	2	2	1
chr1	242048615	G	C	EXO1	rs4150000,CS013819	canonical_splice	ENSG00000174371	ENST00000366548.3:c.2212-1G>C	NA	NA	NA	24.2	0.00515433	0.00566751	0	81	81	0	0	27	27	0
chr1	145687019	TG	T	RNF115	COSM3788604	frameshift_variant	ENSG00000121848	ENST00000369291.5:c.712delG	ENSP00000358297.4:p.Glu238LysfsTer22	NA	NA	33	0	5.24769e-05	0	1	1	0	0	0	0	0
chr1	242048647	ACT	A	EXO1	rs746998518	frameshift_variant	ENSG00000174371	ENST00000366548.3:c.2248_2249delCT	ENSP00000355506.3:p.Leu750PhefsTer30	NA	NA	32	0	5.24769e-05	0	1	1	0	0	0	0	0
chr10	22048446	C	CCA	DNAJC1	NA	frameshift_variant	ENSG00000136770	ENST00000376980.3:c.1248_1249insTG	ENSP00000366179.3:p.Ala417TrpfsTer58	NA	NA	24.2	0	5.24769e-05	0	1	1	0	0	0	0	0
chr11	69462835	C	CCT	CCND1	NA	frameshift_variant	ENSG00000110092	ENST00000227507.2:c.649_650dupCT	ENSP00000227507.2:p.Arg218Ter	NA	NA	35	0	5.24769e-05	0	1	1	0	0	0	0	0
chr12	28116422	CCTTT	C	PTHLH	NA	frameshift_variant	ENSG00000087494	ENST00000395872.1:c.379_382delAAAG	ENSP00000379213.1:p.Lys127AlafsTer21	NA	NA	35	0	5.24769e-05	0	0	0	0	0	1	1	0
chr16	80638363	CA	C	CDYL2	rs779145592	frameshift_variant	ENSG00000166446	ENST00000570137.2:c.1442delT	ENSP00000476295.1:p.Met481SerfsTer83	NA	NA	35	0	5.24769e-05	0	0	0	0	0	1	1	0
chr17	53045677	AG	A	COX11	rs777789256	frameshift_variant	ENSG00000166260	ENST00000299335.3:c.330delC	ENSP00000299335.3:p.Tyr111ThrfsTer85	NA	NA	25.1	0	5.24769e-05	0	0	0	0	0	1	1	0
chr2	202122999	A	AAACTTCTTCCT	CASP8	rs777586802	frameshift_variant	ENSG00000064012	ENST00000358485.4:c.46_56dupAACTTCTTCCT	ENSP00000351273.4:p.Gly20ThrfsTer18	NA	NA	11.29	0	5.24769e-05	0	1	1	0	0	0	0	0
chr2	202149612	CTA	C	CASP8	NA	frameshift_variant	ENSG00000064012	ENST00000358485.4:c.1055_1056delAT	ENSP00000351273.4:p.Tyr352Ter	NA	NA	22.9	0	5.24769e-05	0	1	1	0	0	0	0	0
chr4	106155755	AAC	A	TET2	NA	frameshift_variant	ENSG00000168769	ENST00000540549.1:c.664_665delCA	ENSP00000442788.1:p.His222TrpfsTer2	NA	NA	26.1	0	5.24769e-05	0	1	1	0	0	0	0	0
chr4	106156477	T	TC	TET2	NA	frameshift_variant	ENSG00000168769	ENST00000540549.1:c.1381dupC	ENSP00000442788.1:p.Gln461ProfsTer4	NA	NA	24	0	5.24769e-05	0	0	0	0	0	1	1	0
chr4	106156993	CA	C	TET2	rs771967161	frameshift_variant	ENSG00000168769	ENST00000540549.1:c.1897delA	ENSP00000442788.1:p.Met633CysfsTer6	NA	NA	19.74	0	5.24769e-05	0	0	0	0	0	1	1	0
chr4	106157182	AT	A	TET2	NA	frameshift_variant	ENSG00000168769	ENST00000540549.1:c.2084delT	ENSP00000442788.1:p.Met695SerfsTer5	NA	NA	15.62	0	5.24769e-05	0	0	0	0	0	1	1	0
chr4	106196848	TGA	T	TET2	NA	frameshift_variant	ENSG00000168769	ENST00000540549.1:c.5184_5185delGA	ENSP00000442788.1:p.Glu1728AspfsTer11	NA	NA	34	0	5.24769e-05	0	1	1	0	0	0	0	0
chr6	151907076	AG	A	CCDC170	rs545657915	frameshift_variant	ENSG00000120262	ENST00000239374.7:c.1147delG	ENSP00000239374.6:p.Glu383SerfsTer26	NA	NA	20.8	0	5.24769e-05	0	0	0	0	0	1	1	4
chr9	21994233	T	TC	CDKN2A	rs779306249	frameshift_variant	ENSG00000147889	ENST00000579755	ENSP00000462950.1:p.Glu33GlyfsTer30	NA	NA	26.9	0	5.24769e-05	0	1	1	0	0	0	0	0
chr12	115110019	G	GA	TBX3	NA	frameshift_variant	ENSG00000135111	ENST00000257566.3:c.1858dupT	ENSP00000257566.3:p.Ser620PhefsTer72	NA	NA	35	0	5.24769e-05	0	1	1	1	0	0	0	2
chr16	53922749	GTT	G	FTO	NA	frameshift_variant	ENSG00000140718	ENST00000471389.1:c.1127_1128delTT	ENSP00000418823.1:p.Phe376Ter	NA	NA	35	0	5.24769e-05	0	0	0	1	0	1	1	0
chr17	53040128	TC	T	COX11	NA	frameshift_variant	ENSG00000166260	ENST00000299335.3:c.796delG	ENSP00000299335.3:p.Glu266LysfsTer16	NA	NA	34	0	5.24769e-05	0	1	1	1	0	0	0	1
chr2	202123052	TAG	T	CASP8	NA	frameshift_variant	ENSG00000064012	ENST00000358485.4:c.99_100delAG	ENSP00000351273.4:p.Gly34GlnfsTer24	NA	NA	24.6	0	5.24769e-05	0	1	1	1	0	0	0	0
chr2	202131330	GCCTTGATGTTATTC	G	CASP8	NA	frameshift_variant	ENSG00000064012	ENST00000358485.4:c.300_313delCTTGATGTTATTCC	ENSP00000351273.4:p.Leu101GlufsTer24	NA	NA	28.1	0	5.24769e-05	0	1	1	1	0	0	0	0
chr2	202137453	CA	C	CASP8	NA	frameshift_variant	ENSG00000064012	ENST00000358485.4:c.683delA	ENSP00000351273.4:p.Lys228ArgfsTer4	NA	NA	22.5	0	5.24769e-05	0	1	1	1	0	0	0	0
chr3	27353617	TGTGCTGCTCTTCTCCATAG	T	NEK10	NA	frameshift_variant	ENSG00000163491	ENST00000341435.5:c.522_540delCTATGGAGAAGAGCAGCAC	ENSP00000343847.5:p.Tyr175LeufsTer8	NA	NA	35	0	5.24769e-05	0	1	1	1	0	0	0	1
chr3	27353658	ATC	A	NEK10	NA	frameshift_variant	ENSG00000163491	ENST00000341435.5:c.498_499delGA	ENSP00000343847.5:p.Glu166AspfsTer5	NA	NA	35	0	5.24769e-05	0	1	1	1	0	0	0	1
chr3	46935471	ACGCG	ATT	PTH1R	NA	frameshift_variant	ENSG00000160801	ENST00000313049.5:c.151_152delCG	ENSP00000321999.4:p.Arg51AlafsTer31	NA	NA	34	0	5.24769e-05	0	1	1	1	0	0	0	0
chr4	106155362	GT	G	TET2	COSM447196,COSM1485571	frameshift_variant	ENSG00000168769	ENST00000540549.1:c.266delT	ENSP00000442788.1:p.Leu89CysfsTer6	NA	NA	21.9	0	5.24769e-05	0	1	1	1	0	0	0	0
chr4	106156040	GT	G	TET2	rs750810129,COSM87078	frameshift_variant	ENSG00000168769	ENST00000540549.1:c.943delT	ENSP00000442788.1:p.Ser315ProfsTer32	NA	NA	23.2	0	5.24769e-05	0	1	1	1	0	0	0	0
chr4	106156809	TCGTTTTCACCAAG	T	TET2	NA	frameshift_variant	ENSG00000168769	ENST00000540549.1:c.1713_1725delTTTTCACCAAGCG	ENSP00000442788.1:p.Phe572AsnfsTer4	NA	NA	25	0	5.24769e-05	0	0	0	1	0	1	1	1
chr4	106193761	G	GA	TET2	NA	frameshift_variant	ENSG00000168769	ENST00000540549.1:c.4227dupA	ENSP00000442788.1:p.Pro1410ThrfsTer2	NA	NA	24.9	0	5.24769e-05	0	0	0	1	0	1	1	1
chr4	106196345	T	TA	TET2	COSM1716912	frameshift_variant	ENSG00000168769	ENST00000540549.1:c.4679dupA	ENSP00000442788.1:p.Tyr1560Ter	NA	NA	24.7	0	5.24769e-05	0	0	0	1	0	1	1	0
chr10	123279502	CT	C	FGFR2	rs121913475,COSM36901	frameshift_variant	ENSG00000066468	ENST00000457416.2:c.929delA	ENSP00000410294.2:p.Lys310ArgfsTer8	NA	NA	35	0	5.24769e-05	0	1	1	2	0	0	0	0
chr4	106164861	ACT	A	TET2	COSM3719516	frameshift_variant	ENSG00000168769	ENST00000540549.1:c.3732_3733delCT	ENSP00000442788.1:p.Tyr1245LeufsTer22	NA	NA	35	0	5.24769e-05	0	0	0	2	0	1	1	0
chr6	1312975	CG	C	FOXQ1	rs752117907	frameshift_variant	ENSG00000164379	ENST00000296839.2:c.40delG	ENSP00000296839.2:p.Asp14ThrfsTer127	NA	NA	28.9	0	5.24769e-05	0	1	1	2	0	0	0	1
chr4	106157649	TC	T	TET2	rs750148768	frameshift_variant	ENSG00000168769	ENST00000540549.1:c.2552delC	ENSP00000442788.1:p.Pro851LeufsTer22	NA	NA	12.32	0	5.24769e-05	0	1	1	3	0	0	0	0
chr5	44809096	T	TA	MRPS30	NA	frameshift_variant	ENSG00000112996	ENST00000507110.1:c.33dupA	ENSP00000424328.1:p.Arg12ThrfsTer12	NA	NA	23	0	5.24769e-05	0	1	1	3	0	0	0	1
chr6	151869587	CTGCCTCCTGTACTGAAGAGA	C	CCDC170	rs776419042	frameshift_variant	ENSG00000120262	ENST00000239374.7:c.738_757delTGCCTCCTGTACTGAAGAGA	ENSP00000239374.6:p.Ala247ArgfsTer18	NA	NA	35	0	5.24769e-05	0	1	1	6	0	0	0	3
chr3	30686315	A	AT	TGFBR2	NA	frameshift_variant	ENSG00000163513	ENST00000359013.4:c.250dupT	ENSP00000351905.4:p.Ser84PhefsTer4	NA	NA	25.5	0	5.24769e-05	0	1	1	7	0	0	0	2
chr1	242042051	G	GT	EXO1	rs773504726	frameshift_variant	ENSG00000174371	ENST00000366548.3:c.1522dupT	ENSP00000355506.3:p.Cys508LeufsTer7	NA	NA	35	0	5.24769e-05	0	1	1	9	0	0	0	5
chr6	151790110	CTG	C	C6orf211	NA	frameshift_variant	ENSG00000146476	ENST00000367294.3:c.1193_1194delGT	ENSP00000356263.3:p.Cys398TyrfsTer8	NA	NA	35	0	5.24769e-05	0	1	1	24	0	0	0	2
chr5	56160734	T	TA	MAP3K1	NA	frameshift_variant	ENSG00000095015	ENST00000399503.3:c.1011dupA	ENSP00000382423.3:p.Tyr338IlefsTer47	NA	NA	35	0	5.24769e-05	0	1	1	31	0	0	0	2
chr5	56168498	C	CT	MAP3K1	NA	frameshift_variant	ENSG00000095015	ENST00000399503.3:c.1457dupT	ENSP00000382423.3:p.Leu486PhefsTer7	NA	NA	35	0	5.24769e-05	0	1	1	46	0	0	0	4
chr6	151789833	AAC	A	C6orf211	rs754855026	frameshift_variant	ENSG00000146476	ENST00000367294.3:c.918_919delCA	ENSP00000356263.3:p.His306GlnfsTer2	NA	NA	22.8	3e-05	5.24769e-05	0	1	1	70	0	0	0	27
chr6	151894437	CT	C	CCDC170	rs775942422	frameshift_variant	ENSG00000120262	ENST00000239374.7:c.904delT	ENSP00000239374.6:p.Ser302LeufsTer8	NA	NA	23.1	3e-05	5.24769e-05	0	1	1	93	0	0	0	94
chr10	22292169	GT	G	DNAJC1	NA	frameshift_variant	ENSG00000136770	ENST00000376980.3:c.194delA	ENSP00000366179.3:p.Asn65ThrfsTer26	NA	NA	34	0	5.24769e-05	0	1	1	126	0	0	0	46
chr6	151775726	TTAAC	T	C6orf211	NA	frameshift_variant	ENSG00000146476	ENST00000367294.3:c.89_92delCTAA	ENSP00000356263.3:p.Thr30ArgfsTer62	NA	NA	35	0	5.24769e-05	0	1	1	433	0	0	0	47
chr6	151775710	CAG	C	C6orf211	rs780973220	frameshift_variant	ENSG00000146476	ENST00000367294.3:c.71_72delGA	ENSP00000356263.3:p.Arg24AsnfsTer7	NA	NA	35	5.99e-05	5.24769e-05	0	1	1	445	0	0	0	48
chr6	1313529	A	AC	FOXQ1	NA	frameshift_variant	ENSG00000164379	ENST00000296839.2:c.594dupC	ENSP00000296839.2:p.Asn199GlnfsTer250	NA	NA	24.8	0	5.24769e-05	0	0	0	847	0	1	1	44
chr4	106155748	TC	T	TET2	rs749148733,COSM3718982,COSM3718981	frameshift_variant	ENSG00000168769	ENST00000540549.1:c.651delC	ENSP00000442788.1:p.Val218TrpfsTer32	NA	NA	33	3e-05	0.000104954	0	2	2	0	0	0	0	0
chr10	22048121	CT	C	DNAJC1	rs749622030	frameshift_variant	ENSG00000136770	ENST00000376980.3:c.1573delA	ENSP00000366179.3:p.Arg525AspfsTer36	NA	NA	33	0	0.000104954	0	1	1	1	0	1	1	0
chr1	242020659	CAG	C	EXO1	NA	frameshift_variant	ENSG00000174371	ENST00000366548.3:c.419_420delAG	ENSP00000355506.3:p.Gln140ArgfsTer10	NA	NA	29.1	0	0.000104954	0	2	2	2	0	0	0	0
chr1	114448344	C	CG	DCLRE1B	rs751850180	frameshift_variant	ENSG00000118655	ENST00000369563.3:c.138dupG	ENSP00000358576.3:p.Pro47AlafsTer20	NA	NA	35	3e-05	0.000104954	0	2	2	64	0	0	0	19
chr1	242024746	GA	G	EXO1	rs764660825	frameshift_variant	ENSG00000174371	ENST00000366548.3:c.986delA	ENSP00000355506.3:p.Asn329IlefsTer4	NA	NA	29.1	0.000119868	0.000157431	0	3	3	839	0	0	0	102
chr1	242042113	ATG	A	EXO1	rs775025243	frameshift_variant	ENSG00000174371	ENST00000366548.3:c.1578_1579delTG	ENSP00000355506.3:p.Asp526GlufsTer7	NA	NA	28.2	8.99e-05	0.000209908	0	4	4	0	0	0	0	0
chr6	151914282	TG	T	CCDC170	COSM1246938	frameshift_variant	ENSG00000120262	ENST00000239374.7:c.1336delG	ENSP00000239374.6:p.Asp446ThrfsTer17	NA	NA	35	0	0.000209908	0	4	4	63	0	0	0	74
chr6	151789635	CAA	C	C6orf211	rs753305348	frameshift_variant	ENSG00000146476	ENST00000367294.3:c.717_718delAA	ENSP00000356263.3:p.Glu241LysfsTer6	NA	NA	25.7	3e-05	0.000209908	0	3	3	1669	0	1	1	206
chr17	53045714	G	GT	COX11	rs755467194	frameshift_variant	ENSG00000166260	ENST00000299335.3:c.293dupA	ENSP00000299335.3:p.Tyr98Ter	NA	NA	35	0	0.000262385	0	3	3	0	0	2	2	0
chr11	69465975	CGAGGAGGAGGAA	C	CCND1	NA	inframe_indel	ENSG00000110092	ENST00000227507.2:c.825_836delAGAGGAGGAGGA	ENSP00000227507.2:p.Glu277_Glu280del	NA	NA	20.4	0	5.24769e-05	0	1	1	0	0	0	0	0
chr17	53045787	G	GGCC	COX11	NA	inframe_indel	ENSG00000166260	ENST00000299335.3:c.218_220dupGGC	ENSP00000299335.3:p.Arg73dup	NA	NA	12.84	0	5.24769e-05	0	1	1	0	0	0	0	1
chr22	40815129	CTGGCCACCG	C	MKL1	rs745744064	inframe_indel	ENSG00000196588	ENST00000355630.3:c.1304_1312delCGGTGGCCA	ENSP00000347847.3:p.Thr435_Ala437del	NA	NA	20.5	0	5.24769e-05	0	1	1	0	0	0	0	1
chr3	27326108	CCTTATCCCCCAA	C	NEK10	NA	inframe_indel	ENSG00000163491	ENST00000341435.5:c.1987_1998delTTGGGGGATAAG	ENSP00000343847.5:p.Leu663_Lys666del	NA	NA	23	0	5.24769e-05	0	1	1	0	0	0	0	0
chr3	30713232	TCTA	T	TGFBR2	NA	inframe_indel	ENSG00000163513	ENST00000359013.4:c.635_637delACT	ENSP00000351905.4:p.Tyr212del	NA	NA	19.64	0	5.24769e-05	0	0	0	0	0	1	1	0
chr3	46940906	AGAG	A	PTH1R	NA	inframe_indel	ENSG00000160801	ENST00000313049.5:c.949_951delGAG	ENSP00000321999.4:p.Glu317del	NA	NA	22.4	0	5.24769e-05	0	1	1	0	0	0	0	2
chr6	151917617	CAGA	C	CCDC170	NA	inframe_indel	ENSG00000120262	ENST00000239374.7:c.1621_1623delAAG	ENSP00000239374.6:p.Lys541del	NA	NA	15.85	0	5.24769e-05	0	0	0	0	0	1	1	0
chr12	115114154	GAGA	G	TBX3	rs771239166	inframe_indel	ENSG00000135111	ENST00000257566.3:c.1060_1062delTCT	ENSP00000257566.3:p.Ser354del	NA	NA	15.71	3e-05	5.24769e-05	0	0	0	0	0	1	1	0
chr2	202136259	CAGA	C	CASP8	rs763516126,COSM1014850,COSM1591642,COSM1014849	inframe_indel	ENSG00000064012	ENST00000358485.4:c.509_511delAAG	ENSP00000351273.4:p.Glu170del	NA	NA	14.42	3e-05	5.24769e-05	0	1	1	0	0	0	0	17
chr4	106155275	GTTA	G	TET2	rs764640803	inframe_indel	ENSG00000168769	ENST00000540549.1:c.181_183delTAT	ENSP00000442788.1:p.Tyr61del	NA	NA	7.172	3e-05	5.24769e-05	0	0	0	0	0	1	1	0
chr22	40815141	GCCA	G	MKL1	rs769718183	inframe_indel	ENSG00000196588	ENST00000355630.3:c.1298_1300delTGG	ENSP00000347847.3:p.Val433del	NA	NA	20.3	0.000179802	5.24769e-05	0	0	0	0	0	1	1	1
chr16	52473324	TGGAGGC	T	TOX3	NA	inframe_indel	ENSG00000103460	ENST00000219746.9:c.1538_1543delGCCTCC	ENSP00000219746.9:p.Arg513_Leu514del	NA	NA	12.55	0	5.24769e-05	0	0	0	1	0	1	1	4
chr5	56177983	CCTT	C	MAP3K1	rs754402779	inframe_indel	ENSG00000095015	ENST00000399503.3:c.2965_2967delTCT	ENSP00000382423.3:p.Ser989del	NA	NA	7.191	5.99e-05	5.24769e-05	0	1	1	1	0	0	0	1
chr6	152265450	TAAG	T	ESR1	rs748961781	inframe_indel	ENSG00000091831	ENST00000440973.1:c.909_911delGAA	ENSP00000405330.1:p.Lys303del	NA	NA	19.96	5.99e-05	5.24769e-05	0	0	0	1	0	1	1	0
chr4	106158261	AAAAGTT	A	TET2	rs751389315	inframe_indel	ENSG00000168769	ENST00000540549.1:c.3163_3168delAAAGTT	ENSP00000442788.1:p.Lys1055_Val1056del	NA	NA	13.67	3e-05	5.24769e-05	0	1	1	17	0	0	0	0
chr4	106158404	ATAATTT	A	TET2	NA	inframe_indel	ENSG00000168769	ENST00000540549.1:c.3308_3313delATTTTA	ENSP00000442788.1:p.Asn1103_Phe1104del	NA	NA	16.07	0	5.24769e-05	0	1	1	57	0	0	0	3
chr5	59189405	TCCGCTGCCCGCCCGGGCCGGCGCG	T	PDE4D	NA	inframe_indel	ENSG00000113448	ENST00000340635.6:c.21_44delCGCGCCGGCCCGGGCGGGCAGCGG	ENSP00000345502.6:p.Ser7_Gly15delinsArg	NA	NA	14.01	0	5.24769e-05	0	0	0	446	0	1	1	304
chr4	106196278	GCCCCAGCAGCAGCAGAGA	G	TET2	rs771696884	inframe_indel	ENSG00000168769	ENST00000540549.1:c.4627_4644delAGACCCCAGCAGCAGCAG	ENSP00000442788.1:p.Arg1543_Gln1548del	NA	NA	10.82	0	0.000104954	0	2	2	0	0	0	0	0
chr2	174230219	G	GTGA	CDCA7	rs745882123	inframe_indel	ENSG00000144354	ENST00000306721.3:c.935_937dupTGA	ENSP00000306968.3:p.Val312_Thr313insMet	NA	NA	16.05	3e-05	0.000104954	0	1	1	0	0	1	1	0
chr1	242035382	CGAA	C	EXO1	rs779981618	inframe_indel	ENSG00000174371	ENST00000366548.3:c.1322_1324delAGA	ENSP00000355506.3:p.Lys441del	NA	NA	18.7	5.99e-05	0.000104954	0	2	2	0	0	0	0	0
chr6	151789706	TTAA	T	C6orf211	rs751706054	inframe_indel	ENSG00000146476	ENST00000367294.3:c.790_792delATA	ENSP00000356263.3:p.Ile264del	NA	NA	20.9	5.99e-05	0.000104954	0	1	1	18	0	1	1	6
chr4	106196240	TCCCAGCAGC	T	TET2	NA	inframe_indel	ENSG00000168769	ENST00000540549.1:c.4580_4588delAGCCCCAGC	ENSP00000442788.1:p.Gln1527_Gln1529del	NA	NA	17.42	0	0.000104954	0	2	2	60	0	0	0	19
chr3	46940907	GAGA	G	PTH1R	rs763395894	inframe_indel	ENSG00000160801	ENST00000313049.5:c.955_957delAAG	ENSP00000321999.4:p.Lys319del	NA	NA	22.3	3e-05	0.000157431	0	2	2	0	0	1	1	2
chr5	56177979	AACC	A	MAP3K1	rs140733770	inframe_indel	ENSG00000095015	ENST00000399503.3:c.2953_2955delACC	ENSP00000382423.3:p.Thr985del	NA	NA	3.994	5.99e-05	0.000157431	0	3	3	0	0	0	0	0
chr1	114448284	CTCT	C	DCLRE1B	rs763030449	inframe_indel	ENSG00000118655	ENST00000369563.3:c.84_86delCTT	ENSP00000358576.3:p.Phe28del	NA	NA	22.4	0.000119868	0.000157431	0	1	1	2	0	2	2	0
chr4	106194005	TGAAAAG	T	TET2	NA	inframe_indel	ENSG00000168769	ENST00000540549.1:c.4474_4479delGAAAAG	ENSP00000442788.1:p.Glu1492_Lys1493del	NA	NA	22.1	0	0.000157431	0	3	3	563	0	0	0	37
chr16	80718824	TTGGAGG	T	CDYL2	rs763740410	inframe_indel	ENSG00000166446	ENST00000570137.2:c.221_226delCCTCCA	ENSP00000476295.1:p.Thr74_Ser75del	NA	NA	12.76	0.000119868	0.000209908	0	3	3	1	0	1	1	1
chr8	128750586	CGAG	C	MYC	rs776242757	inframe_indel	ENSG00000136997	ENST00000377970.2:c.130_132delGAG	ENSP00000367207.2:p.Glu44del	NA	NA	19.1	0	0.000262385	0	4	4	0	0	1	1	0
chr4	106196281	CCAGCAGCAGCAGAGACCCCAG	C	TET2	NA	inframe_indel	ENSG00000168769	ENST00000540549.1:c.4625_4645delAGAGACCCCAGCAGCAGCAGC	ENSP00000442788.1:p.Gln1542_Gln1548del	NA	NA	8.669	0	0.000262385	0	4	4	1	0	1	1	1
chr5	1293675	GTCC	G	TERT	rs377639087	inframe_indel	ENSG00000164362	ENST00000310581.5:c.1323_1325delGGA	ENSP00000309572.5:p.Glu441del	NA	NA	2.84	0	0.00781906	0	102	102	0	2	45	47	0
chr10	64159298	A	G	ZNF365	NA	intron_variant	ENSG00000138311	ENST00000410046.3:c.924+10963A>G	NA	NA	NA	12.11	0	5.24769e-05	0	0	0	0	0	1	1	1
chr10	64159307	C	T	ZNF365	rs747198432	intron_variant	ENSG00000138311	ENST00000410046.3:c.924+10972C>T	NA	NA	NA	13.13	0	5.24769e-05	0	1	1	0	0	0	0	1
chr10	64159316	A	G	ZNF365	NA	intron_variant	ENSG00000138311	ENST00000410046.3:c.924+10981A>G	NA	NA	NA	10.85	0	5.24769e-05	0	1	1	0	0	0	0	0
chr10	64159445	G	A	ZNF365	rs749968463	intron_variant	ENSG00000138311	ENST00000410046.3:c.924+11110G>A	NA	NA	NA	20.9	0	5.24769e-05	0	1	1	0	0	0	0	0
chr10	64159449	A	C	ZNF365	NA	intron_variant	ENSG00000138311	ENST00000410046.3:c.924+11114A>C	NA	NA	NA	17.21	0	5.24769e-05	0	1	1	0	0	0	0	0
chr10	64159498	A	C	ZNF365	NA	intron_variant	ENSG00000138311	ENST00000410046.3:c.924+11163A>C	NA	NA	NA	19.44	0	5.24769e-05	0	0	0	0	0	1	1	0
chr10	64159499	G	A	ZNF365	COSM126377	intron_variant	ENSG00000138311	ENST00000410046.3:c.924+11164G>A	NA	NA	NA	21.6	0	5.24769e-05	0	1	1	0	0	0	0	0
chr10	64159505	A	G	ZNF365	NA	intron_variant	ENSG00000138311	ENST00000410046.3:c.924+11170A>G	NA	NA	NA	21.9	0	5.24769e-05	0	1	1	0	0	0	0	0
chr10	64159546	T	G	ZNF365	NA	intron_variant	ENSG00000138311	ENST00000410046.3:c.924+11211T>G	NA	NA	NA	21.7	0	5.24769e-05	0	1	1	0	0	0	0	0
chr10	64414623	A	G	ZNF365	NA	intron_variant	ENSG00000138311	ENST00000410046.3:c.1130-1533A>G	NA	NA	NA	2.905	0	5.24769e-05	0	1	1	0	0	0	0	0
chr10	64415162	TC	T	ZNF365	rs751462096	intron_variant	ENSG00000138311	ENST00000410046.3:c.1130-989delC	NA	NA	NA	1.017	0	5.24769e-05	0	1	1	0	0	0	0	0
chr10	64415188	T	C	ZNF365	rs117189017	intron_variant	ENSG00000138311	ENST00000410046.3:c.1130-968T>C	NA	NA	NA	4.595	0	5.24769e-05	0	1	1	0	0	0	0	0
chr10	64415190	C	A	ZNF365	NA	intron_variant	ENSG00000138311	ENST00000410046.3:c.1130-966C>A	NA	NA	NA	8.271	0	5.24769e-05	0	1	1	0	0	0	0	0
chr10	64415302	G	A	ZNF365	rs111472605	intron_variant	ENSG00000138311	ENST00000410046.3:c.1130-854G>A	NA	NA	NA	6.377	0	5.24769e-05	0	0	0	0	0	1	1	0
chr14	68944363	A	T	RAD51B	NA	intron_variant	ENSG00000182185	ENST00000487270.1:c.1036+9396A>T	NA	NA	NA	0.971	0	5.24769e-05	0	0	0	0	0	1	1	1
chr16	52553331	G	GTT	TOX3	NA	intron_variant	ENSG00000103460	ENST00000219746.9:c.87+27216_87+27217dupAA	NA	NA	NA	4.158	0	5.24769e-05	0	1	1	0	0	0	0	0
chr16	52553332	T	A	TOX3	rs759112416	intron_variant	ENSG00000103460	ENST00000219746.9:c.87+27217A>T	NA	NA	NA	8.739	0	5.24769e-05	0	1	1	0	0	0	0	0
chr16	52553361	C	T	TOX3	NA	intron_variant	ENSG00000103460	ENST00000219746.9:c.87+27188G>A	NA	NA	NA	1.875	0	5.24769e-05	0	0	0	0	0	1	1	0
chr16	52553377	G	A	TOX3	COSM1378302	intron_variant	ENSG00000103460	ENST00000219746.9:c.87+27172C>T	NA	NA	NA	0.08	0	5.24769e-05	0	0	0	0	0	1	1	0
chr3	4790968	G	A	EGOT	NA	intron_variant	ENSG00000150995	ENST00000302640.8:c.5499+13930G>A	NA	NA	NA	0.947	0	5.24769e-05	0	1	1	0	0	0	0	0
chr3	4791051	T	C	EGOT	NA	intron_variant	ENSG00000150995	ENST00000302640.8:c.5499+14013T>C	NA	NA	NA	3.807	0	5.24769e-05	0	1	1	0	0	0	0	0
chr3	4791089	C	T	EGOT	NA	intron_variant	ENSG00000150995	ENST00000302640.8:c.5499+14051C>T	NA	NA	NA	7.549	0	5.24769e-05	0	1	1	0	0	0	0	0
chr3	4791099	A	C	EGOT	NA	intron_variant	ENSG00000150995	ENST00000302640.8:c.5499+14061A>C	NA	NA	NA	1.329	0	5.24769e-05	0	1	1	0	0	0	0	0
chr3	4791114	G	T	EGOT	rs182099832	intron_variant	ENSG00000150995	ENST00000302640.8:c.5499+14076G>T	NA	NA	NA	1.779	0	5.24769e-05	0	1	1	0	0	0	0	0
chr3	4791115	G	C	EGOT	NA	intron_variant	ENSG00000150995	ENST00000302640.8:c.5499+14077G>C	NA	NA	NA	0.899	0	5.24769e-05	0	1	1	0	0	0	0	0
chr3	4791122	G	A	EGOT	NA	intron_variant	ENSG00000150995	ENST00000302640.8:c.5499+14084G>A	NA	NA	NA	2.291	0	5.24769e-05	0	1	1	0	0	0	0	0
chr3	4791128	C	T	EGOT	NA	intron_variant	ENSG00000150995	ENST00000302640.8:c.5499+14090C>T	NA	NA	NA	6.434	0	5.24769e-05	0	1	1	0	0	0	0	0
chr3	4791150	C	T	EGOT	NA	intron_variant	ENSG00000150995	ENST00000302640.8:c.5499+14112C>T	NA	NA	NA	5.973	0	5.24769e-05	0	1	1	0	0	0	0	0
chr3	4791158	A	G	EGOT	NA	intron_variant	ENSG00000150995	ENST00000302640.8:c.5499+14120A>G	NA	NA	NA	1.248	0	5.24769e-05	0	1	1	0	0	0	0	0
chr3	4791214	C	A	EGOT	NA	intron_variant	ENSG00000150995	ENST00000302640.8:c.5499+14176C>A	NA	NA	NA	6.571	0	5.24769e-05	0	1	1	0	0	0	0	0
chr3	4791219	A	G	EGOT	NA	intron_variant	ENSG00000150995	ENST00000302640.8:c.5499+14181A>G	NA	NA	NA	5.192	0	5.24769e-05	0	1	1	0	0	0	0	0
chr3	4791301	A	G	EGOT	rs532328853	intron_variant	ENSG00000150995	ENST00000302640.8:c.5499+14263A>G	NA	NA	NA	0.48	0	5.24769e-05	0	0	0	0	0	1	1	0
chr3	4791421	G	T	EGOT	rs765781624	intron_variant	ENSG00000150995	ENST00000302640.8:c.5499+14383G>T	NA	NA	NA	1.561	0	5.24769e-05	0	1	1	0	0	0	0	0
chr3	4791501	C	T	EGOT	rs748491906	intron_variant	ENSG00000150995	ENST00000302640.8:c.5499+14463C>T	NA	NA	NA	4.326	0	5.24769e-05	0	1	1	0	0	0	0	0
chr3	4791520	C	G	EGOT	NA	intron_variant	ENSG00000150995	ENST00000302640.8:c.5499+14482C>G	NA	NA	NA	3.115	0	5.24769e-05	0	1	1	0	0	0	0	0
chr3	4791565	C	T	EGOT	NA	intron_variant	ENSG00000150995	ENST00000302640.8:c.5499+14527C>T	NA	NA	NA	5.051	0	5.24769e-05	0	0	0	0	0	1	1	1
chr3	4791605	C	A	EGOT	NA	intron_variant	ENSG00000150995	ENST00000302640.8:c.5499+14567C>A	NA	NA	NA	8.266	0	5.24769e-05	0	1	1	0	0	0	0	0
chr3	4792699	A	G	EGOT	rs200149177	intron_variant	ENSG00000150995	ENST00000302640.8:c.5500-15515A>G	NA	NA	NA	2.156	0	5.24769e-05	0	1	1	0	0	0	0	0
chr3	4792716	C	T	EGOT	NA	intron_variant	ENSG00000150995	ENST00000302640.8:c.5500-15498C>T	NA	NA	NA	7.306	0	5.24769e-05	0	0	0	0	0	1	1	0
chr3	4792718	C	G	EGOT	NA	intron_variant	ENSG00000150995	ENST00000302640.8:c.5500-15496C>G	NA	NA	NA	3.795	0	5.24769e-05	0	0	0	0	0	1	1	0
chr3	4792758	A	G	EGOT	NA	intron_variant	ENSG00000150995	ENST00000302640.8:c.5500-15456A>G	NA	NA	NA	4.638	0	5.24769e-05	0	1	1	0	0	0	0	0
chr3	4792787	T	G	EGOT	NA	intron_variant	ENSG00000150995	ENST00000302640.8:c.5500-15427T>G	NA	NA	NA	6.921	0	5.24769e-05	0	1	1	0	0	0	0	0
chr3	4792800	C	T	EGOT	rs760210510	intron_variant	ENSG00000150995	ENST00000302640.8:c.5500-15414C>T	NA	NA	NA	2.63	0	5.24769e-05	0	1	1	0	0	0	0	0
chr3	4793013	G	C	EGOT	NA	intron_variant	ENSG00000150995	ENST00000302640.8:c.5500-15201G>C	NA	NA	NA	1.181	0	5.24769e-05	0	1	1	0	0	0	0	0
chr3	4793028	C	T	EGOT	NA	intron_variant	ENSG00000150995	ENST00000302640.8:c.5500-15186C>T	NA	NA	NA	4.98	0	5.24769e-05	0	1	1	0	0	0	0	0
chr3	4793029	T	A	EGOT	NA	intron_variant	ENSG00000150995	ENST00000302640.8:c.5500-15185T>A	NA	NA	NA	2.94	0	5.24769e-05	0	1	1	0	0	0	0	0
chr3	4793043	A	C	EGOT	NA	intron_variant	ENSG00000150995	ENST00000302640.8:c.5500-15171A>C	NA	NA	NA	3.028	0	5.24769e-05	0	1	1	0	0	0	0	0
chr3	4793055	G	A	EGOT	NA	intron_variant	ENSG00000150995	ENST00000302640.8:c.5500-15159G>A	NA	NA	NA	6.604	0	5.24769e-05	0	1	1	0	0	0	0	0
chr3	4793091	G	A	EGOT	NA	intron_variant	ENSG00000150995	ENST00000302640.8:c.5500-15123G>A	NA	NA	NA	7.602	0	5.24769e-05	0	0	0	0	0	1	1	0
chr3	4793117	G	A	EGOT	rs532654414	intron_variant	ENSG00000150995	ENST00000302640.8:c.5500-15097G>A	NA	NA	NA	4.029	0	5.24769e-05	0	0	0	0	0	1	1	0
chr3	4793166	G	A	EGOT	NA	intron_variant	ENSG00000150995	ENST00000302640.8:c.5500-15048G>A	NA	NA	NA	3.895	0	5.24769e-05	0	1	1	0	0	0	0	0
chr4	106158544	T	C	TET2	NA	intron_variant	ENSG00000168769	ENST00000540549.1:c.3409+36T>C	NA	NA	NA	14.06	0	5.24769e-05	0	1	1	0	0	0	0	0
chr4	106158545	A	C	TET2	rs35264841	intron_variant	ENSG00000168769	ENST00000540549.1:c.3409+37A>C	NA	NA	NA	13.35	0	5.24769e-05	0	1	1	0	0	0	0	0
chr4	106158550	G	T	TET2	rs141975400	intron_variant	ENSG00000168769	ENST00000540549.1:c.3409+42G>T	NA	NA	NA	14.05	0	5.24769e-05	0	1	1	0	0	0	0	0
chr4	106158569	C	T	TET2	NA	intron_variant	ENSG00000168769	ENST00000540549.1:c.3409+61C>T	NA	NA	NA	15.11	0	5.24769e-05	0	1	1	0	0	0	0	0
chr5	58334814	G	A	PDE4D	NA	intron_variant	ENSG00000113448	ENST00000340635.6:c.809-16C>T	NA	NA	NA	18.29	0	5.24769e-05	0	1	1	0	0	0	0	0
chr5	59064067	C	A	PDE4D	NA	intron_variant	ENSG00000113448	ENST00000340635.6:c.455+124928G>T	NA	NA	NA	16.47	0	5.24769e-05	0	0	0	0	0	1	1	4
chr5	59064136	A	G	PDE4D	NA	intron_variant	ENSG00000113448	ENST00000340635.6:c.455+124859T>C	NA	NA	NA	16.69	0	5.24769e-05	0	0	0	0	0	1	1	0
chr5	59064150	A	G	PDE4D	NA	intron_variant	ENSG00000113448	ENST00000340635.6:c.455+124845T>C	NA	NA	NA	15.31	0	5.24769e-05	0	0	0	0	0	1	1	0
chr5	59064267	C	T	PDE4D	NA	intron_variant	ENSG00000113448	ENST00000340635.6:c.455+124728G>A	NA	NA	NA	17.91	0	5.24769e-05	0	1	1	0	0	0	0	0
chr5	59064319	C	T	PDE4D	NA	intron_variant	ENSG00000113448	ENST00000340635.6:c.455+124676G>A	NA	NA	NA	16.65	0	5.24769e-05	0	0	0	0	0	1	1	0
chr9	21974490	T	C	CDKN2A	NA	intron_variant	ENSG00000147889	ENST00000498124.1:c.150+187A>G	NA	NA	NA	4.501	0	5.24769e-05	0	1	1	0	0	0	0	1
chr9	21974525	G	A	CDKN2A	rs75256133	intron_variant	ENSG00000147889	ENST00000498124.1:c.150+152C>T	NA	NA	NA	8.654	0	5.24769e-05	0	1	1	0	0	0	0	1
chr9	21974593	G	T	CDKN2A	NA	intron_variant	ENSG00000147889	ENST00000498124.1:c.150+84C>A	NA	NA	NA	8.23	0	5.24769e-05	0	1	1	0	0	0	0	0
chr10	64159302	G	A	ZNF365	rs141696527,COSM919427	intron_variant	ENSG00000138311	ENST00000410046.3:c.924+10967G>A	NA	NA	NA	10.44	3e-05	5.24769e-05	0	1	1	0	0	0	0	0
chr10	64414690	G	T	ZNF365	rs111763771	intron_variant	ENSG00000138311	ENST00000410046.3:c.1130-1466G>T	NA	NA	NA	1.287	3e-05	5.24769e-05	0	1	1	0	0	0	0	0
chr2	202134321	T	C	CASP8	rs11897628	intron_variant	ENSG00000064012	ENST00000358485.4:c.483-1918T>C	NA	NA	NA	1.134	3e-05	5.24769e-05	0	1	1	0	0	0	0	0
chr5	59064100	T	C	PDE4D	rs746770452	intron_variant	ENSG00000113448	ENST00000340635.6:c.455+124895A>G	NA	NA	NA	15.77	3e-05	5.24769e-05	0	1	1	0	0	0	0	4
chr5	59064157	G	C	PDE4D	rs766066406	intron_variant	ENSG00000113448	ENST00000340635.6:c.455+124838C>G	NA	NA	NA	16.37	3e-05	5.24769e-05	0	0	0	0	0	1	1	0
chr5	59064316	G	A	PDE4D	rs763393916	intron_variant	ENSG00000113448	ENST00000340635.6:c.455+124679C>T	NA	NA	NA	17.3	3e-05	5.24769e-05	0	0	0	0	0	1	1	0
chr9	21974645	T	A	CDKN2A	rs779174268	intron_variant	ENSG00000147889	ENST00000498124.1:c.150+32A>T	NA	NA	NA	7.845	3e-05	5.24769e-05	0	0	0	0	0	1	1	1
chr9	21974656	C	T	CDKN2A	rs369946603	intron_variant	ENSG00000147889	ENST00000498124.1:c.150+21G>A	NA	NA	NA	11.6	3e-05	5.24769e-05	0	1	1	0	0	0	0	1
chr10	64415230	G	A	ZNF365	rs41306564,COSM3397202	intron_variant	ENSG00000138311	ENST00000410046.3:c.1130-926G>A	NA	NA	NA	3.906	5.99e-05	5.24769e-05	0	1	1	0	0	0	0	1
chr10	64414651	C	T	ZNF365	rs776212992	intron_variant	ENSG00000138311	ENST00000410046.3:c.1130-1505C>T	NA	NA	NA	0.96	8.99e-05	5.24769e-05	0	1	1	0	0	0	0	0
chr2	202134281	GAC	G	CASP8	rs762135470	intron_variant	ENSG00000064012	ENST00000358485.4:c.483-1954_483-1953delCA	NA	NA	NA	0.966	8.99e-05	5.24769e-05	0	0	0	0	0	1	1	0
chr2	202134304	G	A	CASP8	rs774427459	intron_variant	ENSG00000064012	ENST00000358485.4:c.483-1935G>A	NA	NA	NA	1.118	8.99e-05	5.24769e-05	0	1	1	0	0	0	0	0
chr10	123276975	G	A	FGFR2	rs201717227	intron_variant	ENSG00000066468	ENST00000457416.2:c.1087+1221C>T	NA	NA	NA	14.41	0.000389571	5.24769e-05	0	1	1	0	0	0	0	0
chr10	64415313	C	T	ZNF365	rs781518838	intron_variant	ENSG00000138311	ENST00000410046.3:c.1130-843C>T	NA	NA	NA	6.755	0	5.24769e-05	0	1	1	1	0	0	0	0
chr10	64415355	A	T	ZNF365	NA	intron_variant	ENSG00000138311	ENST00000410046.3:c.1130-801A>T	NA	NA	NA	3.789	0	5.24769e-05	0	1	1	1	0	0	0	0
chr10	64415360	G	C	ZNF365	rs137908562,COSM377395	intron_variant	ENSG00000138311	ENST00000410046.3:c.1130-796G>C	NA	NA	NA	0.295	0	5.24769e-05	0	1	1	1	0	0	0	0
chr10	64415371	A	G	ZNF365	rs371052202	intron_variant	ENSG00000138311	ENST00000410046.3:c.1130-785A>G	NA	NA	NA	13.37	0	5.24769e-05	0	1	1	1	0	0	0	0
chr3	4790994	A	G	EGOT	NA	intron_variant	ENSG00000150995	ENST00000302640.8:c.5499+13956A>G	NA	NA	NA	4.455	0	5.24769e-05	0	0	0	1	0	1	1	1
chr3	4790995	T	C	EGOT	NA	intron_variant	ENSG00000150995	ENST00000302640.8:c.5499+13957T>C	NA	NA	NA	4.658	0	5.24769e-05	0	1	1	1	0	0	0	1
chr3	4791002	T	C	EGOT	NA	intron_variant	ENSG00000150995	ENST00000302640.8:c.5499+13964T>C	NA	NA	NA	1.437	0	5.24769e-05	0	0	0	1	0	1	1	1
chr3	4791024	G	T	EGOT	NA	intron_variant	ENSG00000150995	ENST00000302640.8:c.5499+13986G>T	NA	NA	NA	3.928	0	5.24769e-05	0	1	1	1	0	0	0	1
chr3	4791240	A	T	EGOT	NA	intron_variant	ENSG00000150995	ENST00000302640.8:c.5499+14202A>T	NA	NA	NA	4.528	0	5.24769e-05	0	0	0	1	0	1	1	0
chr3	4791243	C	T	EGOT	NA	intron_variant	ENSG00000150995	ENST00000302640.8:c.5499+14205C>T	NA	NA	NA	7.392	0	5.24769e-05	0	1	1	1	0	0	0	0
chr3	4791251	C	T	EGOT	rs538012010	intron_variant	ENSG00000150995	ENST00000302640.8:c.5499+14213C>T	NA	NA	NA	6.42	0	5.24769e-05	0	0	0	1	0	1	1	0
chr3	4791254	A	G	EGOT	NA	intron_variant	ENSG00000150995	ENST00000302640.8:c.5499+14216A>G	NA	NA	NA	2.714	0	5.24769e-05	0	1	1	1	0	0	0	0
chr3	4791294	T	C	EGOT	NA	intron_variant	ENSG00000150995	ENST00000302640.8:c.5499+14256T>C	NA	NA	NA	4.854	0	5.24769e-05	0	1	1	1	0	0	0	0
chr3	4791297	T	C	EGOT	NA	intron_variant	ENSG00000150995	ENST00000302640.8:c.5499+14259T>C	NA	NA	NA	2.921	0	5.24769e-05	0	1	1	1	0	0	0	0
chr3	4792731	A	G	EGOT	NA	intron_variant	ENSG00000150995	ENST00000302640.8:c.5500-15483A>G	NA	NA	NA	3.237	0	5.24769e-05	0	0	0	1	0	1	1	0
chr3	4792749	A	T	EGOT	NA	intron_variant	ENSG00000150995	ENST00000302640.8:c.5500-15465A>T	NA	NA	NA	0.163	0	5.24769e-05	0	1	1	1	0	0	0	0
chr3	4792828	A	C	EGOT	rs138141041	intron_variant	ENSG00000150995	ENST00000302640.8:c.5500-15386A>C	NA	NA	NA	2.968	0	5.24769e-05	0	1	1	1	0	0	0	0
chr3	4792828	A	T	EGOT	rs138141041	intron_variant	ENSG00000150995	ENST00000302640.8:c.5500-15386A>T	NA	NA	NA	3.726	0	5.24769e-05	0	0	0	1	0	1	1	0
chr3	4792831	A	G	EGOT	NA	intron_variant	ENSG00000150995	ENST00000302640.8:c.5500-15383A>G	NA	NA	NA	0.68	0	5.24769e-05	0	1	1	1	0	0	0	0
chr3	4792835	C	T	EGOT	rs768091095	intron_variant	ENSG00000150995	ENST00000302640.8:c.5500-15379C>T	NA	NA	NA	7.537	0	5.24769e-05	0	1	1	1	0	0	0	0
chr3	4792852	C	T	EGOT	NA	intron_variant	ENSG00000150995	ENST00000302640.8:c.5500-15362C>T	NA	NA	NA	6.252	0	5.24769e-05	0	1	1	1	0	0	0	0
chr10	64415306	C	T	ZNF365	rs141356718	intron_variant	ENSG00000138311	ENST00000410046.3:c.1130-850C>T	NA	NA	NA	10.21	8.99e-05	5.24769e-05	0	0	0	1	0	1	1	0
chr10	64403710	A	T	ZNF365	rs758092953	intron_variant	ENSG00000138311	ENST00000410046.3:c.1130-12446A>T	NA	NA	NA	11.42	0	5.24769e-05	0	1	1	2	0	0	0	0
chr3	4791341	G	A	EGOT	rs554629095	intron_variant	ENSG00000150995	ENST00000302640.8:c.5499+14303G>A	NA	NA	NA	5.825	0	5.24769e-05	0	1	1	2	0	0	0	2
chr3	4791366	G	A	EGOT	NA	intron_variant	ENSG00000150995	ENST00000302640.8:c.5499+14328G>A	NA	NA	NA	3.429	0	5.24769e-05	0	0	0	2	0	1	1	2
chr3	4791446	A	C	EGOT	NA	intron_variant	ENSG00000150995	ENST00000302640.8:c.5499+14408A>C	NA	NA	NA	10.26	0	5.24769e-05	0	1	1	2	0	0	0	1
chr10	64403694	G	C	ZNF365	rs749901747	intron_variant	ENSG00000138311	ENST00000410046.3:c.1130-12462G>C	NA	NA	NA	11.61	3e-05	5.24769e-05	0	0	0	2	0	1	1	0
chr14	68963863	G	C	RAD51B	NA	intron_variant	ENSG00000182185	ENST00000487270.1:c.1036+28896G>C	NA	NA	NA	0.265	0	5.24769e-05	0	1	1	7	0	0	0	1
chr3	4791183	G	A	EGOT	NA	intron_variant	ENSG00000150995	ENST00000302640.8:c.5499+14145G>A	NA	NA	NA	2.449	0	5.24769e-05	0	1	1	13	0	0	0	5
chr10	64159422	G	T	ZNF365	rs776087887	intron_variant	ENSG00000138311	ENST00000410046.3:c.924+11087G>T	NA	NA	NA	11.07	0	5.24769e-05	0	1	1	17	0	0	0	32
chr10	64159384	A	G	ZNF365	rs376568719	intron_variant	ENSG00000138311	ENST00000410046.3:c.924+11049A>G	NA	NA	NA	14.21	8.99e-05	5.24769e-05	0	0	0	17	0	1	1	32
chr3	4790878	T	C	EGOT	NA	intron_variant	ENSG00000150995	ENST00000302640.8:c.5499+13840T>C	NA	NA	NA	2.102	0	5.24769e-05	0	0	0	18	0	1	1	1
chr14	68963844	A	T	RAD51B	NA	intron_variant	ENSG00000182185	ENST00000487270.1:c.1036+28877A>T	NA	NA	NA	2.476	0	5.24769e-05	0	1	1	28	0	0	0	1
chr14	68963847	G	A	RAD51B	rs750408457	intron_variant	ENSG00000182185	ENST00000487270.1:c.1036+28880G>A	NA	NA	NA	5.202	0	5.24769e-05	0	1	1	28	0	0	0	1
chr14	68963838	C	A	RAD51B	rs186629790	intron_variant	ENSG00000182185	ENST00000487270.1:c.1036+28871C>A	NA	NA	NA	6.453	3e-05	5.24769e-05	0	1	1	28	0	0	0	1
chr5	58571200	C	G	PDE4D	NA	intron_variant	ENSG00000113448	ENST00000340635.6:c.456-59406G>C	NA	NA	NA	20.4	0	5.24769e-05	0	0	0	31	0	1	1	12
chr3	4792640	A	G	EGOT	NA	intron_variant	ENSG00000150995	ENST00000302640.8:c.5500-15574A>G	NA	NA	NA	6.056	0	5.24769e-05	0	1	1	47	0	0	0	2
chr5	58334872	C	T	PDE4D	NA	intron_variant	ENSG00000113448	ENST00000340635.6:c.809-74G>A	NA	NA	NA	17.84	0	5.24769e-05	0	1	1	48	0	0	0	0
chr5	58334875	C	G	PDE4D	rs532394208	intron_variant	ENSG00000113448	ENST00000340635.6:c.809-77G>C	NA	NA	NA	15.63	0	5.24769e-05	0	1	1	48	0	0	0	0
chr5	58334894	C	G	PDE4D	NA	intron_variant	ENSG00000113448	ENST00000340635.6:c.809-96G>C	NA	NA	NA	16.73	0	5.24769e-05	0	1	1	48	0	0	0	0
chr5	58334921	G	GGCT	PDE4D	NA	intron_variant	ENSG00000113448	ENST00000340635.6:c.809-126_809-124dupAGC	NA	NA	NA	7.075	0	5.24769e-05	0	1	1	48	0	0	0	0
chr5	58334936	T	C	PDE4D	NA	intron_variant	ENSG00000113448	ENST00000340635.6:c.809-138A>G	NA	NA	NA	2.905	0	5.24769e-05	0	1	1	48	0	0	0	0
chr3	4791638	C	G	EGOT	NA	intron_variant	ENSG00000150995	ENST00000302640.8:c.5499+14600C>G	NA	NA	NA	2.121	0	5.24769e-05	0	1	1	50	0	0	0	0
chr5	58882160	C	A	PDE4D	rs368317807	intron_variant	ENSG00000113448	ENST00000340635.6:c.455+306835G>T	NA	NA	NA	16.48	0.000209769	5.24769e-05	0	0	0	78	0	1	1	10
chr5	58882206	G	A	PDE4D	rs774490946	intron_variant	ENSG00000113448	ENST00000340635.6:c.455+306789C>T	NA	NA	NA	13.58	8.99e-05	5.24769e-05	0	1	1	201	0	0	0	25
chr5	58882205	C	A	PDE4D	rs376681746	intron_variant	ENSG00000113448	ENST00000340635.6:c.455+306790G>T	NA	NA	NA	12.2	0	5.24769e-05	0	1	1	207	0	0	0	368
chr9	22008778	G	A	CDKN2B	rs752167737	intron_variant	ENSG00000147883	ENST00000276925.6:c.156+19C>T	NA	NA	NA	16.24	0	5.24769e-05	0	1	1	777	0	0	0	325
chr9	22008739	G	A	CDKN2B	NA	intron_variant	ENSG00000147883	ENST00000276925.6:c.156+58C>T	NA	NA	NA	15.03	0	5.24769e-05	0	1	1	793	0	0	0	331
chr9	22008730	C	T	CDKN2B	rs201305174	intron_variant	ENSG00000147883	ENST00000276925.6:c.156+67G>A	NA	NA	NA	12.51	0	5.24769e-05	0	1	1	796	0	0	0	331
chr9	22008787	C	A	CDKN2B	NA	intron_variant	ENSG00000147883	ENST00000276925.6:c.156+10G>T	NA	NA	NA	19.89	0	5.24769e-05	0	1	1	807	0	0	0	342
chr10	123276839	G	C	FGFR2	NA	intron_variant	ENSG00000066468	ENST00000457416.2:c.1087+1357C>G	NA	NA	NA	14.63	0	0.000104954	0	2	2	0	0	0	0	0
chr10	64414650	A	G	ZNF365	NA	intron_variant	ENSG00000138311	ENST00000410046.3:c.1130-1506A>G	NA	NA	NA	3.556	0	0.000104954	0	1	1	0	0	1	1	0
chr10	64414681	C	A	ZNF365	NA	intron_variant	ENSG00000138311	ENST00000410046.3:c.1130-1475C>A	NA	NA	NA	3.261	0	0.000104954	0	2	2	0	0	0	0	0
chr2	202134261	G	T	CASP8	rs758051022	intron_variant	ENSG00000064012	ENST00000358485.4:c.483-1978G>T	NA	NA	NA	0.794	0	0.000104954	0	2	2	0	0	0	0	0
chr3	4791046	C	T	EGOT	NA	intron_variant	ENSG00000150995	ENST00000302640.8:c.5499+14008C>T	NA	NA	NA	8.399	0	0.000104954	0	2	2	0	0	0	0	0
chr3	4791219	A	C	EGOT	NA	intron_variant	ENSG00000150995	ENST00000302640.8:c.5499+14181A>C	NA	NA	NA	2.853	0	0.000104954	0	1	1	0	0	1	1	0
chr3	4791226	A	G	EGOT	NA	intron_variant	ENSG00000150995	ENST00000302640.8:c.5499+14188A>G	NA	NA	NA	1.082	0	0.000104954	0	2	2	0	0	0	0	0
chr3	4791333	AG	A	EGOT	NA	intron_variant	ENSG00000150995	ENST00000302640.8:c.5499+14296delG	NA	NA	NA	1.743	0	0.000104954	0	2	2	0	0	0	0	0
chr3	4792756	G	T	EGOT	NA	intron_variant	ENSG00000150995	ENST00000302640.8:c.5500-15458G>T	NA	NA	NA	5.672	0	0.000104954	0	2	2	0	0	0	0	0
chr3	4793061	G	A	EGOT	NA	intron_variant	ENSG00000150995	ENST00000302640.8:c.5500-15153G>A	NA	NA	NA	3.947	0	0.000104954	0	1	1	0	0	1	1	0
chr3	4793139	C	T	EGOT	NA	intron_variant	ENSG00000150995	ENST00000302640.8:c.5500-15075C>T	NA	NA	NA	7.967	0	0.000104954	0	1	1	0	0	1	1	0
chr3	4793142	A	G	EGOT	NA	intron_variant	ENSG00000150995	ENST00000302640.8:c.5500-15072A>G	NA	NA	NA	2.474	0	0.000104954	0	2	2	0	0	0	0	0
chr5	58652624	T	C	PDE4D	NA	intron_variant	ENSG00000113448	ENST00000340635.6:c.456-140830A>G	NA	NA	NA	3.157	0	0.000104954	0	2	2	0	0	0	0	0
chr9	21974577	T	C	CDKN2A	NA	intron_variant	ENSG00000147889	ENST00000498124.1:c.150+100A>G	NA	NA	NA	5.958	0	0.000104954	0	0	0	0	0	2	2	0
chr4	106158559	A	C	TET2	rs764203635	intron_variant	ENSG00000168769	ENST00000540549.1:c.3409+51A>C	NA	NA	NA	12.35	3e-05	0.000104954	0	2	2	0	0	0	0	0
chr9	21974628	T	A	CDKN2A	rs752389002	intron_variant	ENSG00000147889	ENST00000498124.1:c.150+49A>T	NA	NA	NA	11.08	3e-05	0.000104954	0	1	1	0	0	1	1	0
chr10	123276975	G	C	FGFR2	rs201717227	intron_variant	ENSG00000066468	ENST00000457416.2:c.1087+1221C>G	NA	NA	NA	12.61	5.99e-05	0.000104954	0	2	2	0	0	0	0	0
chr2	202134255	TG	T	CASP8	rs776712453	intron_variant	ENSG00000064012	ENST00000358485.4:c.483-1981delG	NA	NA	NA	2.966	8.99e-05	0.000104954	0	2	2	0	0	0	0	0
chr10	64239629	G	A	ZNF365	rs745520218	intron_variant	ENSG00000138311	ENST00000410046.3:c.981+20073G>A	NA	NA	NA	4.789	0	0.000104954	0	1	1	1	0	1	1	0
chr3	4791275	C	T	EGOT	rs79652400	intron_variant	ENSG00000150995	ENST00000302640.8:c.5499+14237C>T	NA	NA	NA	4.073	0	0.000104954	0	2	2	1	0	0	0	0
chr3	4792832	C	T	EGOT	NA	intron_variant	ENSG00000150995	ENST00000302640.8:c.5500-15382C>T	NA	NA	NA	6.141	0	0.000104954	0	1	1	1	0	1	1	0
chr3	4792869	G	A	EGOT	rs568542835	intron_variant	ENSG00000150995	ENST00000302640.8:c.5500-15345G>A	NA	NA	NA	3.337	0	0.000104954	0	1	1	1	0	1	1	0
chr3	4792869	G	T	EGOT	rs568542835	intron_variant	ENSG00000150995	ENST00000302640.8:c.5500-15345G>T	NA	NA	NA	1.981	0	0.000104954	0	2	2	1	0	0	0	0
chr10	64415328	G	C	ZNF365	rs374280044	intron_variant	ENSG00000138311	ENST00000410046.3:c.1130-828G>C	NA	NA	NA	0.558	3e-05	0.000104954	0	1	1	1	0	1	1	0
chr9	21974657	G	A	CDKN2A	rs550846229	intron_variant	ENSG00000147889	ENST00000498124.1:c.150+20C>T	NA	NA	NA	11.45	3e-05	0.000104954	0	1	1	1	0	1	1	1
chr3	4791365	A	G	EGOT	rs747299287	intron_variant	ENSG00000150995	ENST00000302640.8:c.5499+14327A>G	NA	NA	NA	2.677	0	0.000104954	0	1	1	2	0	1	1	2
chr3	4791376	C	T	EGOT	rs547911569	intron_variant	ENSG00000150995	ENST00000302640.8:c.5499+14338C>T	NA	NA	NA	5.036	0	0.000104954	0	1	1	2	0	1	1	2
chr3	4793125	C	T	EGOT	NA	intron_variant	ENSG00000150995	ENST00000302640.8:c.5500-15089C>T	NA	NA	NA	6.047	0	0.000104954	0	2	2	2	0	0	0	0
chr10	64159355	G	C	ZNF365	rs760302065	intron_variant	ENSG00000138311	ENST00000410046.3:c.924+11020G>C	NA	NA	NA	11.63	3e-05	0.000104954	0	2	2	17	0	0	0	32
chr10	64159416	C	T	ZNF365	rs148384716	intron_variant	ENSG00000138311	ENST00000410046.3:c.924+11081C>T	NA	NA	NA	14.88	3e-05	0.000104954	0	1	1	17	0	1	1	32
chr3	4792646	G	A	EGOT	NA	intron_variant	ENSG00000150995	ENST00000302640.8:c.5500-15568G>A	NA	NA	NA	4.303	0	0.000104954	0	2	2	47	0	0	0	2
chr3	4792674	G	A	EGOT	NA	intron_variant	ENSG00000150995	ENST00000302640.8:c.5500-15540G>A	NA	NA	NA	0.509	0	0.000104954	0	1	1	48	0	1	1	2
chr5	58334875	C	T	PDE4D	rs532394208	intron_variant	ENSG00000113448	ENST00000340635.6:c.809-77G>A	NA	NA	NA	16.65	5.99e-05	0.000104954	0	2	2	48	0	0	0	0
chr3	4791634	G	A	EGOT	NA	intron_variant	ENSG00000150995	ENST00000302640.8:c.5499+14596G>A	NA	NA	NA	0.46	0	0.000104954	0	2	2	50	0	0	0	0
chr3	4793254	C	G	EGOT	NA	intron_variant	ENSG00000150995	ENST00000302640.8:c.5500-14960C>G	NA	NA	NA	13.61	0	0.000104954	0	2	2	83	0	0	0	4
chr3	4793251	C	T	EGOT	rs186681917	intron_variant	ENSG00000150995	ENST00000302640.8:c.5500-14963C>T	NA	NA	NA	14.8	0	0.000104954	0	2	2	85	0	0	0	4
chr3	4793270	A	G	EGOT	rs75158581	intron_variant	ENSG00000150995	ENST00000302640.8:c.5500-14944A>G	NA	NA	NA	13.97	0	0.000104954	0	2	2	87	0	0	0	4
chr5	58882193	G	A	PDE4D	rs780080723,COSM1069191	intron_variant	ENSG00000113448	ENST00000340635.6:c.455+306802C>T	NA	NA	NA	13.36	3e-05	0.000104954	0	2	2	203	0	0	0	26
chr9	22008751	C	A	CDKN2B	NA	intron_variant	ENSG00000147883	ENST00000276925.6:c.156+46G>T	NA	NA	NA	14.55	0	0.000104954	0	1	1	790	0	1	1	328
chr9	22008788	C	T	CDKN2B	rs371777152	intron_variant	ENSG00000147883	ENST00000276925.6:c.156+9G>A	NA	NA	NA	21.2	8.99e-05	0.000104954	0	1	1	809	0	1	1	339
chr10	123276894	C	T	FGFR2	NA	intron_variant	ENSG00000066468	ENST00000457416.2:c.1087+1302G>A	NA	NA	NA	14.88	0	0.000157431	0	3	3	0	0	0	0	0
chr10	123276915	A	G	FGFR2	rs776683489	intron_variant	ENSG00000066468	ENST00000457416.2:c.1087+1281T>C	NA	NA	NA	15.84	0	0.000157431	0	2	2	0	0	1	1	0
chr10	64159483	C	T	ZNF365	rs528809549	intron_variant	ENSG00000138311	ENST00000410046.3:c.924+11148C>T	NA	NA	NA	21.3	0	0.000157431	0	3	3	0	0	0	0	0
chr10	64415255	T	A	ZNF365	NA	intron_variant	ENSG00000138311	ENST00000410046.3:c.1130-901T>A	NA	NA	NA	6.524	0	0.000157431	0	1	1	0	0	2	2	1
chr10	64415276	A	G	ZNF365	rs748962642	intron_variant	ENSG00000138311	ENST00000410046.3:c.1130-880A>G	NA	NA	NA	4.941	0	0.000157431	0	1	1	0	0	2	2	0
chr16	52553371	C	A	TOX3	NA	intron_variant	ENSG00000103460	ENST00000219746.9:c.87+27178G>T	NA	NA	NA	4.137	0	0.000157431	0	2	2	0	0	1	1	0
chr16	52553373	G	A	TOX3	rs146519714	intron_variant	ENSG00000103460	ENST00000219746.9:c.87+27176C>T	NA	NA	NA	0.066	0	0.000157431	0	3	3	0	0	0	0	0
chr3	4791060	T	C	EGOT	rs545554592	intron_variant	ENSG00000150995	ENST00000302640.8:c.5499+14022T>C	NA	NA	NA	2.274	0	0.000157431	0	2	2	0	0	1	1	0
chr3	4791117	A	G	EGOT	NA	intron_variant	ENSG00000150995	ENST00000302640.8:c.5499+14079A>G	NA	NA	NA	4.533	0	0.000157431	0	3	3	0	0	0	0	0
chr3	4791146	A	G	EGOT	NA	intron_variant	ENSG00000150995	ENST00000302640.8:c.5499+14108A>G	NA	NA	NA	2.74	0	0.000157431	0	3	3	0	0	0	0	0
chr3	4791502	G	A	EGOT	NA	intron_variant	ENSG00000150995	ENST00000302640.8:c.5499+14464G>A	NA	NA	NA	2.643	0	0.000157431	0	2	2	0	0	1	1	0
chr3	4791560	A	G	EGOT	NA	intron_variant	ENSG00000150995	ENST00000302640.8:c.5499+14522A>G	NA	NA	NA	3.268	0	0.000157431	0	2	2	0	0	1	1	1
chr3	4792904	A	G	EGOT	NA	intron_variant	ENSG00000150995	ENST00000302640.8:c.5500-15310A>G	NA	NA	NA	7.112	0	0.000157431	0	2	2	0	0	1	1	0
chr3	4792967	G	C	EGOT	NA	intron_variant	ENSG00000150995	ENST00000302640.8:c.5500-15247G>C	NA	NA	NA	3.766	0	0.000157431	0	3	3	0	0	0	0	0
chr3	4793108	G	C	EGOT	NA	intron_variant	ENSG00000150995	ENST00000302640.8:c.5500-15106G>C	NA	NA	NA	3.333	0	0.000157431	0	0	0	0	0	3	3	0
chr3	4793180	A	G	EGOT	NA	intron_variant	ENSG00000150995	ENST00000302640.8:c.5500-15034A>G	NA	NA	NA	6.215	0	0.000157431	0	1	1	0	0	2	2	0
chr5	59064187	A	G	PDE4D	rs117292391	intron_variant	ENSG00000113448	ENST00000340635.6:c.455+124808T>C	NA	NA	NA	12.29	0	0.000157431	0	3	3	0	0	0	0	0
chr10	64159291	C	T	ZNF365	rs758825538	intron_variant	ENSG00000138311	ENST00000410046.3:c.924+10956C>T	NA	NA	NA	16.56	3e-05	0.000157431	0	3	3	0	0	0	0	1
chr10	64159308	G	A	ZNF365	rs769026084	intron_variant	ENSG00000138311	ENST00000410046.3:c.924+10973G>A	NA	NA	NA	12.33	3e-05	0.000157431	0	3	3	0	0	0	0	0
chr2	202134259	C	A	CASP8	rs376590303	intron_variant	ENSG00000064012	ENST00000358485.4:c.483-1980C>A	NA	NA	NA	3.385	8.99e-05	0.000157431	0	1	1	0	0	2	2	0
chr2	202134289	CTG	C	CASP8	rs765672355	intron_variant	ENSG00000064012	ENST00000358485.4:c.483-1948_483-1947delGT	NA	NA	NA	1.41	8.99e-05	0.000157431	0	1	1	0	0	2	2	0
chr2	202134292	T	C	CASP8	rs748142457	intron_variant	ENSG00000064012	ENST00000358485.4:c.483-1947T>C	NA	NA	NA	0.549	8.99e-05	0.000157431	0	1	1	0	0	2	2	0
chr10	123276981	G	C	FGFR2	rs527592748	intron_variant	ENSG00000066468	ENST00000457416.2:c.1087+1215C>G	NA	NA	NA	13.67	0.000119868	0.000157431	0	3	3	0	0	0	0	0
chr10	64159344	C	T	ZNF365	rs149142683	intron_variant	ENSG00000138311	ENST00000410046.3:c.924+11009C>T	NA	NA	NA	12.59	0.000119868	0.000157431	0	2	2	0	0	1	1	0
chr9	21974650	T	G	CDKN2A	rs762508111	intron_variant	ENSG00000147889	ENST00000498124.1:c.150+27A>C	NA	NA	NA	10.25	0.000389571	0.000157431	0	2	2	0	0	1	1	1
chr3	4792755	G	A	EGOT	rs200985849	intron_variant	ENSG00000150995	ENST00000302640.8:c.5500-15459G>A	NA	NA	NA	1.658	0	0.000157431	0	2	2	1	0	1	1	0
chr9	21974600	GATTCCA	G	CDKN2A	rs753508262	intron_variant	ENSG00000147889	ENST00000498124.1:c.150+71_150+76delTGGAAT	NA	NA	NA	11.83	0	0.000157431	0	1	1	1	0	2	2	0
chr10	64415360	G	A	ZNF365	rs137908562,COSM377395	intron_variant	ENSG00000138311	ENST00000410046.3:c.1130-796G>A	NA	NA	NA	1.868	8.99e-05	0.000157431	0	2	2	1	0	1	1	0
chr2	202134329	G	A	CASP8	rs373232880	intron_variant	ENSG00000064012	ENST00000358485.4:c.483-1910G>A	NA	NA	NA	6.05	0	0.000157431	0	3	3	2	0	0	0	1
chr10	64403693	C	T	ZNF365	rs142615690	intron_variant	ENSG00000138311	ENST00000410046.3:c.1130-12463C>T	NA	NA	NA	13.16	8.99e-05	0.000157431	0	3	3	2	0	0	0	0
chr10	64159389	C	G	ZNF365	rs143052727	intron_variant	ENSG00000138311	ENST00000410046.3:c.924+11054C>G	NA	NA	NA	15.79	8.99e-05	0.000157431	0	3	3	17	0	0	0	32
chr10	123276947	T	C	FGFR2	NA	intron_variant	ENSG00000066468	ENST00000457416.2:c.1087+1249A>G	NA	NA	NA	15.71	0	0.000209908	0	2	2	0	0	2	2	0
chr10	64159314	T	C	ZNF365	rs544073593	intron_variant	ENSG00000138311	ENST00000410046.3:c.924+10979T>C	NA	NA	NA	8.861	0	0.000209908	0	2	2	0	0	2	2	0
chr3	4791213	C	A	EGOT	NA	intron_variant	ENSG00000150995	ENST00000302640.8:c.5499+14175C>A	NA	NA	NA	2.191	0	0.000209908	0	4	4	0	0	0	0	0
chr3	4793016	C	T	EGOT	NA	intron_variant	ENSG00000150995	ENST00000302640.8:c.5500-15198C>T	NA	NA	NA	7.762	0	0.000209908	0	1	1	0	0	3	3	0
chr4	106158578	G	A	TET2	rs367758008	intron_variant	ENSG00000168769	ENST00000540549.1:c.3409+70G>A	NA	NA	NA	14.16	0	0.000209908	0	4	4	0	0	0	0	0
chr5	58652603	G	A	PDE4D	rs775904516	intron_variant	ENSG00000113448	ENST00000340635.6:c.456-140809C>T	NA	NA	NA	11.93	3e-05	0.000209908	0	4	4	0	0	0	0	0
chr3	4792735	C	A	EGOT	NA	intron_variant	ENSG00000150995	ENST00000302640.8:c.5500-15479C>A	NA	NA	NA	0.684	0	0.000209908	0	4	4	1	0	0	0	0
chr3	4792853	G	A	EGOT	NA	intron_variant	ENSG00000150995	ENST00000302640.8:c.5500-15361G>A	NA	NA	NA	4.275	0	0.000209908	0	4	4	1	0	0	0	0
chr3	4791369	C	T	EGOT	rs201889933	intron_variant	ENSG00000150995	ENST00000302640.8:c.5499+14331C>T	NA	NA	NA	8.185	0	0.000209908	0	4	4	2	0	0	0	2
chr3	4793239	A	C	EGOT	rs757842034	intron_variant	ENSG00000150995	ENST00000302640.8:c.5500-14975A>C	NA	NA	NA	5.654	0	0.000209908	0	4	4	83	0	0	0	4
chr3	4792868	C	T	EGOT	rs533725993	intron_variant	ENSG00000150995	ENST00000302640.8:c.5500-15346C>T	NA	NA	NA	7.935	0	0.000262385	0	3	3	0	0	2	2	0
chr5	58652665	A	G	PDE4D	rs779751420	intron_variant	ENSG00000113448	ENST00000340635.6:c.456-140871T>C	NA	NA	NA	15.67	3e-05	0.000262385	0	3	3	0	0	2	2	0
chr5	59064299	G	A	PDE4D	rs536116506	intron_variant	ENSG00000113448	ENST00000340635.6:c.455+124696C>T	NA	NA	NA	15.58	3e-05	0.000262385	0	4	4	0	0	1	1	0
chr5	58652640	C	T	PDE4D	rs199886636	intron_variant	ENSG00000113448	ENST00000340635.6:c.456-140846G>A	NA	NA	NA	12.26	0.000569374	0.000262385	0	5	5	0	0	0	0	0
chr3	4791261	T	A	EGOT	NA	intron_variant	ENSG00000150995	ENST00000302640.8:c.5499+14223T>A	NA	NA	NA	6.786	0	0.000262385	0	1	1	1	0	4	4	0
chr10	64415332	C	T	ZNF365	rs115145632	intron_variant	ENSG00000138311	ENST00000410046.3:c.1130-824C>T	NA	NA	NA	7.201	5.99e-05	0.000262385	0	4	4	1	0	1	1	0
chr10	64415359	C	T	ZNF365	rs200496487	intron_variant	ENSG00000138311	ENST00000410046.3:c.1130-797C>T	NA	NA	NA	7.586	5.99e-05	0.000262385	0	5	5	1	0	0	0	0
chr10	64403694	G	A	ZNF365	rs749901747	intron_variant	ENSG00000138311	ENST00000410046.3:c.1130-12462G>A	NA	NA	NA	13.44	8.99e-05	0.000262385	0	4	4	2	0	1	1	0
chr5	59064277	C	T	PDE4D	rs201360779	intron_variant	ENSG00000113448	ENST00000340635.6:c.455+124718G>A	NA	NA	NA	17.15	0.00194786	0.000314861	0	5	5	0	0	1	1	0
chr3	4791281	A	G	EGOT	rs184113636	intron_variant	ENSG00000150995	ENST00000302640.8:c.5499+14243A>G	NA	NA	NA	5.448	0	0.000314861	0	4	4	1	0	2	2	0
chr3	4791370	C	A	EGOT	rs571150675	intron_variant	ENSG00000150995	ENST00000302640.8:c.5499+14332C>A	NA	NA	NA	6.951	0	0.000314861	0	6	6	2	0	0	0	2
chr3	4793010	C	G	EGOT	rs752906499	intron_variant	ENSG00000150995	ENST00000302640.8:c.5500-15204C>G	NA	NA	NA	3.671	0	0.000367338	0	5	5	0	0	2	2	0
chr3	4793010	C	T	EGOT	rs752906499	intron_variant	ENSG00000150995	ENST00000302640.8:c.5500-15204C>T	NA	NA	NA	5.641	0	0.000367338	0	4	4	0	0	3	3	0
chr3	4793020	G	A	EGOT	rs562004822	intron_variant	ENSG00000150995	ENST00000302640.8:c.5500-15194G>A	NA	NA	NA	5.219	0	0.000367338	0	6	6	0	0	1	1	0
chr3	4791352	C	T	EGOT	NA	intron_variant	ENSG00000150995	ENST00000302640.8:c.5499+14314C>T	NA	NA	NA	4.869	0	0.000367338	0	5	5	2	0	2	2	2
chr3	4792761	G	T	EGOT	rs146235056	intron_variant	ENSG00000150995	ENST00000302640.8:c.5500-15453G>T	NA	NA	NA	6.226	0	0.000419815	0	8	8	0	0	0	0	0
chr3	4793078	C	T	EGOT	rs563590713	intron_variant	ENSG00000150995	ENST00000302640.8:c.5500-15136C>T	NA	NA	NA	7.458	0	0.000419815	0	5	5	0	0	3	3	0
chr10	64414607	T	C	ZNF365	rs748231242	intron_variant	ENSG00000138311	ENST00000410046.3:c.1130-1549T>C	NA	NA	NA	3.193	0.000329637	0.000419815	0	7	7	0	0	1	1	0
chr10	64414661	C	A	ZNF365	rs150312830	intron_variant	ENSG00000138311	ENST00000410046.3:c.1130-1495C>A	NA	NA	NA	5.241	0.000389571	0.000419815	0	6	6	0	0	2	2	0
chr10	64415229	C	T	ZNF365	rs116590827	intron_variant	ENSG00000138311	ENST00000410046.3:c.1130-927C>T	NA	NA	NA	4.987	3e-05	0.000472292	0	6	6	0	0	3	3	1
chr5	58652602	C	T	PDE4D	rs371285569	intron_variant	ENSG00000113448	ENST00000340635.6:c.456-140808G>A	NA	NA	NA	14.76	0.00107881	0.000472292	0	5	5	0	0	4	4	0
chr3	4791047	G	A	EGOT	rs113319659	intron_variant	ENSG00000150995	ENST00000302640.8:c.5499+14009G>A	NA	NA	NA	4.442	0	0.000524769	0	8	8	1	0	2	2	1
chr5	58571178	A	G	PDE4D	rs374207531	intron_variant	ENSG00000113448	ENST00000340635.6:c.456-59384T>C	NA	NA	NA	17.14	0.000239736	0.000524769	0	6	6	31	0	4	4	12
chr5	59064310	G	A	PDE4D	rs368900104	intron_variant	ENSG00000113448	ENST00000340635.6:c.455+124685C>T	NA	NA	NA	14.91	0.000689242	0.000577246	0	10	10	0	0	1	1	0
chr3	4793241	A	T	EGOT	rs764903885	intron_variant	ENSG00000150995	ENST00000302640.8:c.5500-14973A>T	NA	NA	NA	13.15	0	0.000577246	0	9	9	83	0	2	2	4
chr3	4790915	A	T	EGOT	rs767198720	intron_variant	ENSG00000150995	ENST00000302640.8:c.5499+13877A>T	NA	NA	NA	2.911	0	0.000787154	0	8	8	17	0	7	7	1
chr5	58334870	G	A	PDE4D	rs752173583	intron_variant	ENSG00000113448	ENST00000340635.6:c.809-72C>T	NA	NA	NA	14.73	5.99e-05	0.000997061	0	16	16	48	0	3	3	0
chr10	64414641	C	T	ZNF365	rs140515522	intron_variant	ENSG00000138311	ENST00000410046.3:c.1130-1515C>T	NA	NA	NA	3.51	0.00260713	0.00309614	0	45	45	0	0	14	14	0
chr3	4792965	T	C	EGOT	rs535717306	intron_variant	ENSG00000150995	ENST00000302640.8:c.5500-15249T>C	NA	NA	NA	2.283	0	0.003411	0	45	45	0	0	20	20	0
chr9	21974640	C	G	CDKN2A	CM096339,rs45456595	intron_variant	ENSG00000147889	ENST00000498124.1:c.150+37G>C	NA	NA	NA	9.658	0.00656278	0.00556255	0	79	79	0	0	27	27	1
chr3	4791494	A	G	EGOT	rs141811745	intron_variant	ENSG00000150995	ENST00000302640.8:c.5499+14456A>G	NA	NA	NA	0.284	0	0.00865869	0	126	126	0	0	39	39	0
chr3	4791275	C	G	EGOT	rs79652400	intron_variant	ENSG00000150995	ENST00000302640.8:c.5499+14237C>G	NA	NA	NA	1.86	0	0.00881612	0	111	111	1	0	57	57	0
chr3	4793019	C	T	EGOT	rs186961935	intron_variant	ENSG00000150995	ENST00000302640.8:c.5500-15195C>T	NA	NA	NA	4.308	0	0.0111776	2	143	145	0	1	67	68	0
chr3	4791377	G	A	EGOT	rs147963507	intron_variant	ENSG00000150995	ENST00000302640.8:c.5499+14339G>A	NA	NA	NA	3.607	0	0.0123846	1	172	173	3	0	63	63	2
chr5	58334922	G	T	PDE4D	rs16889108	intron_variant	ENSG00000113448	ENST00000340635.6:c.809-124C>A	NA	NA	NA	7.121	0.00128858	0.0287573	2	362	364	48	0	184	184	0
chr3	4793145	A	G	EGOT	rs3792494	intron_variant	ENSG00000150995	ENST00000302640.8:c.5500-15069A>G	NA	NA	NA	6.23	0	0.0415092	8	581	589	0	1	201	202	0
chr3	4793006	T	G	EGOT	rs17041333	intron_variant	ENSG00000150995	ENST00000302640.8:c.5500-15208T>G	NA	NA	NA	3.53	0	0.0418241	14	554	568	0	1	228	229	0
chr3	4791679	A	G	EGOT	rs17041331	intron_variant	ENSG00000150995	ENST00000302640.8:c.5499+14641A>G	NA	NA	NA	6.627	0	0.0446054	11	606	617	52	1	232	233	2
chr3	4790875	C	T	EGOT	rs79204890	intron_variant	ENSG00000150995	ENST00000302640.8:c.5499+13837C>T	NA	NA	NA	6.946	0	0.0448678	12	606	618	17	1	236	237	1
chr3	4791581	C	A	EGOT	rs75325691	intron_variant	ENSG00000150995	ENST00000302640.8:c.5499+14543C>A	NA	NA	NA	5.649	0	0.0522145	11	683	694	0	6	295	301	0
chr3	4791510	T	G	EGOT	rs115806700	intron_variant	ENSG00000150995	ENST00000302640.8:c.5499+14472T>G	NA	NA	NA	4.997	0	0.052267	11	684	695	0	6	295	301	0
chr10	64159333	G	T	ZNF365	rs3758490,COSM146943,COSM3675822	intron_variant	ENSG00000138311	ENST00000410046.3:c.924+10998G>T	NA	NA	NA	12.21	0.846239	0.845036	5035	6408	11443	0	2050	2610	4660	0
chr10	64415184	A	G	ZNF365	CM033482,rs7076156	intron_variant	ENSG00000138311	ENST00000410046.3:c.1130-972A>G	NA	NA	NA	0.945	0.922955	0.933617	7458	5203	12661	0	3007	2123	5130	0
chr1	114450712	A	G	DCLRE1B	NA	missense_variant	ENSG00000118655	ENST00000369563.3:c.437A>G	ENSP00000358576.3:p.Asn146Ser	deleterious(0)	probably_damaging(0.997)	26.6	0	5.24769e-05	0	0	0	0	0	1	1	0
chr1	114453956	A	G	DCLRE1B	NA	missense_variant	ENSG00000118655	ENST00000369563.3:c.742A>G	ENSP00000358576.3:p.Thr248Ala	tolerated(0.64)	benign(0.022)	9.18	0	5.24769e-05	0	1	1	0	0	0	0	0
chr1	114454058	C	A	DCLRE1B	NA	missense_variant	ENSG00000118655	ENST00000369563.3:c.844C>A	ENSP00000358576.3:p.Leu282Ile	deleterious(0)	probably_damaging(0.996)	25.2	0	5.24769e-05	0	0	0	0	0	1	1	0
chr1	114454106	G	A	DCLRE1B	NA	missense_variant	ENSG00000118655	ENST00000369563.3:c.892G>A	ENSP00000358576.3:p.Val298Ile	tolerated(0.08)	probably_damaging(0.986)	24.2	0	5.24769e-05	0	0	0	0	0	1	1	0
chr1	114454113	G	A	DCLRE1B	NA	missense_variant	ENSG00000118655	ENST00000369563.3:c.899G>A	ENSP00000358576.3:p.Arg300Gln	tolerated(0.6)	benign(0.012)	2.833	0	5.24769e-05	0	1	1	0	0	0	0	0
chr1	114454116	G	A	DCLRE1B	NA	missense_variant	ENSG00000118655	ENST00000369563.3:c.902G>A	ENSP00000358576.3:p.Arg301Gln	tolerated(1)	benign(0.001)	0.898	0	5.24769e-05	0	1	1	0	0	0	0	0
chr1	114454254	C	T	DCLRE1B	rs527254164	missense_variant	ENSG00000118655	ENST00000369563.3:c.1040C>T	ENSP00000358576.3:p.Pro347Leu	tolerated(0.31)	benign(0.001)	0.483	0	5.24769e-05	0	1	1	0	0	0	0	1
chr1	114454362	C	T	DCLRE1B	rs142747676	missense_variant	ENSG00000118655	ENST00000369563.3:c.1148C>T	ENSP00000358576.3:p.Ala383Val	tolerated_low_confidence(0.27)	benign(0)	14.3	0	5.24769e-05	0	1	1	0	0	0	0	0
chr1	114454589	C	T	DCLRE1B	rs200134441	missense_variant	ENSG00000118655	ENST00000369563.3:c.1375C>T	ENSP00000358576.3:p.Pro459Ser	tolerated_low_confidence(0.45)	benign(0.004)	6.712	0	5.24769e-05	0	1	1	0	0	0	0	0
chr1	114454626	G	C	DCLRE1B	rs754745369	missense_variant	ENSG00000118655	ENST00000369563.3:c.1412G>C	ENSP00000358576.3:p.Gly471Ala	deleterious_low_confidence(0.05)	benign(0.354)	0.076	0	5.24769e-05	0	1	1	0	0	0	0	0
chr1	114454626	G	T	DCLRE1B	rs754745369	missense_variant	ENSG00000118655	ENST00000369563.3:c.1412G>T	ENSP00000358576.3:p.Gly471Val	deleterious_low_confidence(0.02)	possibly_damaging(0.786)	20.5	0	5.24769e-05	0	1	1	0	0	0	0	0
chr1	114454670	A	G	DCLRE1B	NA	missense_variant	ENSG00000118655	ENST00000369563.3:c.1456A>G	ENSP00000358576.3:p.Ser486Gly	tolerated_low_confidence(0.33)	benign(0.039)	2.985	0	5.24769e-05	0	1	1	0	0	0	0	0
chr1	114454733	A	T	DCLRE1B	rs757797519	missense_variant	ENSG00000118655	ENST00000369563.3:c.1519A>T	ENSP00000358576.3:p.Thr507Ser	deleterious_low_confidence(0.01)	possibly_damaging(0.752)	26.6	0	5.24769e-05	0	1	1	0	0	0	0	0
chr1	114454740	T	G	DCLRE1B	NA	missense_variant	ENSG00000118655	ENST00000369563.3:c.1526T>G	ENSP00000358576.3:p.Val509Gly	deleterious_low_confidence(0)	benign(0.1)	23.2	0	5.24769e-05	0	1	1	0	0	0	0	1
chr1	114454787	G	A	DCLRE1B	NA	missense_variant	ENSG00000118655	ENST00000369563.3:c.1573G>A	ENSP00000358576.3:p.Val525Met	deleterious_low_confidence(0.05)	benign(0.117)	23.7	0	5.24769e-05	0	1	1	0	0	0	0	1
chr1	145663254	G	C	RNF115	NA	missense_variant	ENSG00000121848	ENST00000369291.5:c.315G>C	ENSP00000358297.4:p.Arg105Ser	tolerated(0.08)	benign(0.018)	14.64	0	5.24769e-05	0	1	1	0	0	0	0	0
chr1	145663260	C	A	RNF115	NA	missense_variant	ENSG00000121848	ENST00000369291.5:c.321C>A	ENSP00000358297.4:p.His107Gln	tolerated(0.35)	benign(0.002)	12.26	0	5.24769e-05	0	1	1	0	0	0	0	0
chr1	145663270	A	C	RNF115	NA	missense_variant	ENSG00000121848	ENST00000369291.5:c.331A>C	ENSP00000358297.4:p.Thr111Pro	tolerated(0.29)	benign(0.192)	13.44	0	5.24769e-05	0	1	1	0	0	0	0	0
chr1	145663333	A	G	RNF115	NA	missense_variant	ENSG00000121848	ENST00000369291.5:c.394A>G	ENSP00000358297.4:p.Ser132Gly	tolerated(0.22)	benign(0.012)	17.34	0	5.24769e-05	0	0	0	0	0	1	1	0
chr1	145663340	G	A	RNF115	rs377326453	missense_variant	ENSG00000121848	ENST00000369291.5:c.401G>A	ENSP00000358297.4:p.Arg134His	deleterious(0.02)	probably_damaging(0.911)	26.9	0	5.24769e-05	0	0	0	0	0	1	1	1
chr1	145688116	A	G	RNF115	NA	missense_variant	ENSG00000121848	ENST00000369291.5:c.811A>G	ENSP00000358297.4:p.Ser271Gly	deleterious(0.05)	possibly_damaging(0.465)	25.1	0	5.24769e-05	0	1	1	0	0	0	0	0
chr1	145688153	G	A	RNF115	rs144615982	missense_variant	ENSG00000121848	ENST00000369291.5:c.848G>A	ENSP00000358297.4:p.Ser283Asn	tolerated(0.49)	benign(0.005)	11.66	0	5.24769e-05	0	1	1	0	0	0	0	0
chr1	145688165	C	T	RNF115	NA	missense_variant	ENSG00000121848	ENST00000369291.5:c.860C>T	ENSP00000358297.4:p.Ser287Phe	deleterious_low_confidence(0.04)	possibly_damaging(0.613)	28.1	0	5.24769e-05	0	1	1	0	0	0	0	0
chr1	204499841	G	C	MDM4	NA	missense_variant	ENSG00000198625	ENST00000367182.3:c.183G>C	ENSP00000356150.3:p.Met61Ile	deleterious(0.05)	benign(0.084)	23.5	0	5.24769e-05	0	0	0	0	0	1	1	0
chr1	204511983	G	A	MDM4	NA	missense_variant	ENSG00000198625	ENST00000367182.3:c.583G>A	ENSP00000356150.3:p.Val195Ile	deleterious(0.02)	benign(0.029)	21	0	5.24769e-05	0	1	1	0	0	0	0	0
chr1	204513705	T	C	MDM4	NA	missense_variant	ENSG00000198625	ENST00000367182.3:c.715T>C	ENSP00000356150.3:p.Trp239Arg	deleterious(0)	possibly_damaging(0.724)	25.9	0	5.24769e-05	0	1	1	0	0	0	0	0
chr1	204518374	T	C	MDM4	NA	missense_variant	ENSG00000198625	ENST00000367182.3:c.1037T>C	ENSP00000356150.3:p.Ile346Thr	deleterious(0)	probably_damaging(0.986)	25.7	0	5.24769e-05	0	1	1	0	0	0	0	0
chr1	204518382	A	G	MDM4	NA	missense_variant	ENSG00000198625	ENST00000367182.3:c.1045A>G	ENSP00000356150.3:p.Ile349Val	tolerated(0.37)	benign(0.002)	0.772	0	5.24769e-05	0	1	1	0	0	0	0	0
chr1	204518385	C	T	MDM4	NA	missense_variant	ENSG00000198625	ENST00000367182.3:c.1048C>T	ENSP00000356150.3:p.Pro350Ser	tolerated(0.51)	benign(0.199)	14.55	0	5.24769e-05	0	1	1	0	0	0	0	0
chr1	204518491	T	G	MDM4	rs762197216	missense_variant	ENSG00000198625	ENST00000367182.3:c.1154T>G	ENSP00000356150.3:p.Leu385Arg	tolerated(0.4)	benign(0.003)	10.12	0	5.24769e-05	0	1	1	0	0	0	0	0
chr1	204518566	T	A	MDM4	NA	missense_variant	ENSG00000198625	ENST00000367182.3:c.1229T>A	ENSP00000356150.3:p.Met410Lys	tolerated(0.88)	benign(0.009)	0.003	0	5.24769e-05	0	0	0	0	0	1	1	0
chr1	242013807	T	C	EXO1	CM013705	missense_variant	ENSG00000174371	ENST00000366548.3:c.80T>C	ENSP00000355506.3:p.Val27Ala	tolerated(0.08)	probably_damaging(0.996)	27	0	5.24769e-05	0	1	1	0	0	0	0	0
chr1	242020689	G	A	EXO1	NA	missense_variant	ENSG00000174371	ENST00000366548.3:c.448G>A	ENSP00000355506.3:p.Glu150Lys	deleterious(0)	probably_damaging(1)	34	0	5.24769e-05	0	1	1	0	0	0	0	0
chr1	242023865	C	T	EXO1	NA	missense_variant	ENSG00000174371	ENST00000366548.3:c.803C>T	ENSP00000355506.3:p.Pro268Leu	deleterious(0)	probably_damaging(0.926)	34	0	5.24769e-05	0	1	1	0	0	0	0	0
chr1	242030285	G	T	EXO1	NA	missense_variant	ENSG00000174371	ENST00000366548.3:c.1195G>T	ENSP00000355506.3:p.Val399Leu	tolerated(0.41)	benign(0.002)	0.361	0	5.24769e-05	0	0	0	0	0	1	1	0
chr1	242030298	T	G	EXO1	NA	missense_variant	ENSG00000174371	ENST00000366548.3:c.1208T>G	ENSP00000355506.3:p.Ile403Ser	deleterious(0)	benign(0.126)	23.5	0	5.24769e-05	0	1	1	0	0	0	0	0
chr1	242035411	G	A	EXO1	NA	missense_variant	ENSG00000174371	ENST00000366548.3:c.1345G>A	ENSP00000355506.3:p.Gly449Ser	tolerated(0.31)	benign(0.01)	0.602	0	5.24769e-05	0	1	1	0	0	0	0	0
chr1	242042169	C	G	EXO1	rs113325720	missense_variant	ENSG00000174371	ENST00000366548.3:c.1633C>G	ENSP00000355506.3:p.Gln545Glu	tolerated(1)	benign(0.005)	0.002	0	5.24769e-05	0	1	1	0	0	0	0	15
chr1	242042245	G	T	EXO1	NA	missense_variant	ENSG00000174371	ENST00000366548.3:c.1709G>T	ENSP00000355506.3:p.Gly570Val	tolerated(0.33)	benign(0)	5.371	0	5.24769e-05	0	1	1	0	0	0	0	0
chr1	242042305	G	A	EXO1	NA	missense_variant	ENSG00000174371	ENST00000366548.3:c.1769G>A	ENSP00000355506.3:p.Ser590Asn	tolerated(0.12)	benign(0.001)	5.234	0	5.24769e-05	0	1	1	0	0	0	0	0
chr1	242042328	T	C	EXO1	NA	missense_variant	ENSG00000174371	ENST00000366548.3:c.1792T>C	ENSP00000355506.3:p.Ser598Pro	tolerated(0.13)	benign(0.02)	22.9	0	5.24769e-05	0	1	1	0	0	0	0	0
chr1	242042337	A	G	EXO1	rs140302179	missense_variant	ENSG00000174371	ENST00000366548.3:c.1801A>G	ENSP00000355506.3:p.Thr601Ala	tolerated(0.55)	benign(0.005)	15.78	0	5.24769e-05	0	0	0	0	0	1	1	0
chr1	242042394	A	G	EXO1	NA	missense_variant	ENSG00000174371	ENST00000366548.3:c.1858A>G	ENSP00000355506.3:p.Arg620Gly	tolerated(0.55)	benign(0)	4.269	0	5.24769e-05	0	1	1	0	0	0	0	0
chr1	242042415	A	G	EXO1	NA	missense_variant	ENSG00000174371	ENST00000366548.3:c.1879A>G	ENSP00000355506.3:p.Ser627Gly	tolerated(0.51)	benign(0.002)	1.002	0	5.24769e-05	0	1	1	0	0	0	0	0
chr1	242042419	C	T	EXO1	NA	missense_variant	ENSG00000174371	ENST00000366548.3:c.1883C>T	ENSP00000355506.3:p.Thr628Ile	tolerated(0.24)	benign(0.015)	11.98	0	5.24769e-05	0	1	1	0	0	0	0	0
chr1	242048643	G	A	EXO1	NA	missense_variant	ENSG00000174371	ENST00000366548.3:c.2239G>A	ENSP00000355506.3:p.Ala747Thr	tolerated(0.36)	benign(0.004)	0.327	0	5.24769e-05	0	1	1	0	0	0	0	0
chr1	242048706	A	G	EXO1	rs763889647	missense_variant	ENSG00000174371	ENST00000366548.3:c.2302A>G	ENSP00000355506.3:p.Lys768Glu	deleterious(0)	possibly_damaging(0.78)	32	0	5.24769e-05	0	1	1	0	0	0	0	0
chr10	123243282	G	A	FGFR2	rs375719482	missense_variant	ENSG00000066468	ENST00000457416.2:c.2234C>T	ENSP00000410294.2:p.Pro745Leu	deleterious(0)	possibly_damaging(0.746)	34	0	5.24769e-05	0	1	1	0	0	0	0	0
chr10	123256177	C	T	FGFR2	NA	missense_variant	ENSG00000066468	ENST00000457416.2:c.1735G>A	ENSP00000410294.2:p.Ala579Thr	deleterious(0.02)	possibly_damaging(0.627)	34	0	5.24769e-05	0	0	0	0	0	1	1	0
chr10	123258117	C	T	FGFR2	NA	missense_variant	ENSG00000066468	ENST00000457416.2:c.1567G>A	ENSP00000410294.2:p.Asp523Asn	tolerated(0.23)	probably_damaging(0.997)	25.1	0	5.24769e-05	0	1	1	0	0	0	0	0
chr10	123274641	C	T	FGFR2	rs769536077	missense_variant	ENSG00000066468	ENST00000457416.2:c.1280G>A	ENSP00000410294.2:p.Arg427Lys	tolerated(0.16)	probably_damaging(0.99)	26.4	0	5.24769e-05	0	1	1	0	0	0	0	1
chr10	123274693	A	C	FGFR2	NA	missense_variant	ENSG00000066468	ENST00000457416.2:c.1228T>G	ENSP00000410294.2:p.Phe410Val	tolerated(0.17)	probably_damaging(0.995)	25.1	0	5.24769e-05	0	1	1	0	0	0	0	1
chr10	123274728	A	G	FGFR2	NA	missense_variant	ENSG00000066468	ENST00000457416.2:c.1193T>C	ENSP00000410294.2:p.Leu398Pro	deleterious(0)	possibly_damaging(0.596)	27.2	0	5.24769e-05	0	1	1	0	0	0	0	0
chr10	123279554	T	C	FGFR2	NA	missense_variant	ENSG00000066468	ENST00000457416.2:c.878A>G	ENSP00000410294.2:p.His293Arg	deleterious(0.02)	benign(0.444)	23.5	0	5.24769e-05	0	1	1	0	0	0	0	0
chr10	123310859	C	A	FGFR2	rs759750319,COSM3670467,COSM3670468,COSM3670466,COSM3670465	missense_variant	ENSG00000066468	ENST00000457416.2:c.569G>T	ENSP00000410294.2:p.Arg190Leu	deleterious(0.02)	possibly_damaging(0.692)	28.4	0	5.24769e-05	0	1	1	0	0	0	0	0
chr10	22048185	G	T	DNAJC1	NA	missense_variant	ENSG00000136770	ENST00000376980.3:c.1510C>A	ENSP00000366179.3:p.Leu504Ile	tolerated(0.08)	probably_damaging(0.999)	22.9	0	5.24769e-05	0	0	0	0	0	1	1	0
chr10	22048187	T	G	DNAJC1	NA	missense_variant	ENSG00000136770	ENST00000376980.3:c.1508A>C	ENSP00000366179.3:p.Lys503Thr	tolerated(0.06)	probably_damaging(0.979)	24.7	0	5.24769e-05	0	1	1	0	0	0	0	0
chr10	22048374	G	A	DNAJC1	rs775695831,COSM4013332	missense_variant	ENSG00000136770	ENST00000376980.3:c.1321C>T	ENSP00000366179.3:p.Arg441Trp	deleterious(0.02)	benign(0.035)	20.6	0	5.24769e-05	0	1	1	0	0	0	0	0
chr10	22048389	C	G	DNAJC1	rs774109956	missense_variant	ENSG00000136770	ENST00000376980.3:c.1306G>C	ENSP00000366179.3:p.Gly436Arg	tolerated(0.5)	benign(0.002)	9.43	0	5.24769e-05	0	1	1	0	0	0	0	0
chr10	22048430	G	A	DNAJC1	rs374884418	missense_variant	ENSG00000136770	ENST00000376980.3:c.1265C>T	ENSP00000366179.3:p.Ala422Val	tolerated(0.24)	benign(0.069)	4.309	0	5.24769e-05	0	1	1	0	0	0	0	0
chr10	22048440	C	G	DNAJC1	rs200747447	missense_variant	ENSG00000136770	ENST00000376980.3:c.1255G>C	ENSP00000366179.3:p.Gly419Arg	tolerated(0.34)	benign(0.003)	7.07	0	5.24769e-05	0	1	1	0	0	0	0	0
chr10	22048447	G	T	DNAJC1	rs781405082	missense_variant	ENSG00000136770	ENST00000376980.3:c.1248C>A	ENSP00000366179.3:p.Asp416Glu	tolerated(0.88)	benign(0.001)	0.002	0	5.24769e-05	0	1	1	0	0	0	0	0
chr10	22048448	T	C	DNAJC1	NA	missense_variant	ENSG00000136770	ENST00000376980.3:c.1247A>G	ENSP00000366179.3:p.Asp416Gly	tolerated(0.22)	benign(0.001)	7.728	0	5.24769e-05	0	1	1	0	0	0	0	0
chr10	22171258	G	C	DNAJC1	NA	missense_variant	ENSG00000136770	ENST00000376980.3:c.931C>G	ENSP00000366179.3:p.Gln311Glu	deleterious(0.01)	probably_damaging(0.995)	23.9	0	5.24769e-05	0	1	1	0	0	0	0	0
chr10	22171266	A	G	DNAJC1	NA	missense_variant	ENSG00000136770	ENST00000376980.3:c.923T>C	ENSP00000366179.3:p.Ile308Thr	tolerated(0.06)	probably_damaging(0.999)	28.3	0	5.24769e-05	0	1	1	0	0	0	0	0
chr10	22209776	G	A	DNAJC1	NA	missense_variant	ENSG00000136770	ENST00000376980.3:c.488C>T	ENSP00000366179.3:p.Thr163Ile	deleterious(0)	probably_damaging(0.997)	26.2	0	5.24769e-05	0	1	1	0	0	0	0	0
chr10	22209783	T	A	DNAJC1	NA	missense_variant	ENSG00000136770	ENST00000376980.3:c.481A>T	ENSP00000366179.3:p.Ile161Phe	deleterious(0)	probably_damaging(0.973)	26	0	5.24769e-05	0	1	1	0	0	0	0	0
chr10	22209831	G	A	DNAJC1	COSM1504850	missense_variant	ENSG00000136770	ENST00000376980.3:c.433C>T	ENSP00000366179.3:p.Arg145Trp	deleterious(0)	probably_damaging(1)	29.5	0	5.24769e-05	0	1	1	0	0	0	0	0
chr10	64135956	C	A	ZNF365	NA	missense_variant	ENSG00000138311	ENST00000410046.3:c.4C>A	ENSP00000387091.3:p.Gln2Lys	deleterious_low_confidence(0)	probably_damaging(0.99)	26.9	0	5.24769e-05	0	1	1	0	0	0	0	0
chr10	64136032	G	A	ZNF365	NA	missense_variant	ENSG00000138311	ENST00000410046.3:c.80G>A	ENSP00000387091.3:p.Arg27His	deleterious_low_confidence(0)	probably_damaging(0.999)	31	0	5.24769e-05	0	1	1	0	0	0	0	0
chr10	64136351	C	A	ZNF365	NA	missense_variant	ENSG00000138311	ENST00000410046.3:c.399C>A	ENSP00000387091.3:p.Asp133Glu	tolerated_low_confidence(0.23)	possibly_damaging(0.846)	22.9	0	5.24769e-05	0	1	1	0	0	0	0	0
chr10	64136449	A	G	ZNF365	rs772722173	missense_variant	ENSG00000138311	ENST00000410046.3:c.497A>G	ENSP00000387091.3:p.Asn166Ser	tolerated_low_confidence(0.31)	benign(0.069)	6.655	0	5.24769e-05	0	1	1	0	0	0	0	0
chr10	64136457	G	T	ZNF365	NA	missense_variant	ENSG00000138311	ENST00000410046.3:c.505G>T	ENSP00000387091.3:p.Val169Phe	tolerated_low_confidence(0.19)	probably_damaging(0.982)	23.2	0	5.24769e-05	0	0	0	0	0	1	1	0
chr10	64136583	G	C	ZNF365	rs372952136	missense_variant	ENSG00000138311	ENST00000410046.3:c.631G>C	ENSP00000387091.3:p.Val211Leu	tolerated(0.38)	possibly_damaging(0.861)	23.3	0	5.24769e-05	0	1	1	0	0	0	0	0
chr10	64136622	G	C	ZNF365	COSM381297,COSM381296	missense_variant	ENSG00000138311	ENST00000410046.3:c.670G>C	ENSP00000387091.3:p.Val224Leu	tolerated(0.05)	probably_damaging(0.998)	26.4	0	5.24769e-05	0	1	1	0	0	0	0	0
chr10	64136676	G	A	ZNF365	NA	missense_variant	ENSG00000138311	ENST00000410046.3:c.724G>A	ENSP00000387091.3:p.Glu242Lys	deleterious_low_confidence(0.05)	possibly_damaging(0.848)	29.6	0	5.24769e-05	0	0	0	0	0	1	1	1
chr10	64136688	A	G	ZNF365	NA	missense_variant	ENSG00000138311	ENST00000410046.3:c.736A>G	ENSP00000387091.3:p.Lys246Glu	deleterious_low_confidence(0)	possibly_damaging(0.578)	25.4	0	5.24769e-05	0	1	1	0	0	0	0	1
chr10	64148205	T	C	ZNF365	NA	missense_variant	ENSG00000138311	ENST00000410046.3:c.794T>C	ENSP00000387091.3:p.Val265Ala	tolerated(0.85)	benign(0.041)	11.14	0	5.24769e-05	0	1	1	0	0	0	0	0
chr10	64148235	T	G	ZNF365	rs745708419	missense_variant	ENSG00000138311	ENST00000410046.3:c.824T>G	ENSP00000387091.3:p.Ile275Ser	deleterious_low_confidence(0)	probably_damaging(0.966)	32	0	5.24769e-05	0	1	1	0	0	0	0	0
chr10	64382935	C	T	ZNF365	rs748204154	missense_variant	ENSG00000138311	ENST00000410046.3:c.1054C>T	ENSP00000387091.3:p.Pro352Ser	deleterious_low_confidence(0)	possibly_damaging(0.803)	22.6	0	5.24769e-05	0	1	1	0	0	0	0	0
chr10	64382951	T	C	ZNF365	NA	missense_variant	ENSG00000138311	ENST00000410046.3:c.1070T>C	ENSP00000387091.3:p.Ile357Thr	deleterious_low_confidence(0)	benign(0.291)	0.421	0	5.24769e-05	0	1	1	0	0	0	0	0
chr10	64383010	G	A	ZNF365	NA	missense_variant	ENSG00000138311	ENST00000410046.3:c.1129G>A	ENSP00000387091.3:p.Gly377Arg	deleterious_low_confidence(0)	probably_damaging(0.979)	23.1	0	5.24769e-05	0	1	1	0	0	0	0	0
chr10	64905997	G	C	NRBF2	rs765677980,COSM919444	missense_variant	ENSG00000148572	ENST00000277746.6:c.59G>C	ENSP00000277746.6:p.Arg20Pro	tolerated(0.06)	benign(0.014)	24.9	0	5.24769e-05	0	0	0	0	0	1	1	6
chr11	69456105	C	G	CCND1	NA	missense_variant	ENSG00000110092	ENST00000227507.2:c.24C>G	ENSP00000227507.2:p.Cys8Trp	deleterious(0.04)	possibly_damaging(0.867)	26	0	5.24769e-05	0	1	1	0	0	0	0	0
chr11	69456116	C	A	CCND1	NA	missense_variant	ENSG00000110092	ENST00000227507.2:c.35C>A	ENSP00000227507.2:p.Thr12Asn	tolerated(0.52)	benign(0.016)	14.53	0	5.24769e-05	0	0	0	0	0	1	1	0
chr11	69456131	A	G	CCND1	NA	missense_variant	ENSG00000110092	ENST00000227507.2:c.50A>G	ENSP00000227507.2:p.Tyr17Cys	tolerated(0.12)	possibly_damaging(0.838)	23.7	0	5.24769e-05	0	1	1	0	0	0	0	0
chr11	69456195	C	G	CCND1	rs780366497	missense_variant	ENSG00000110092	ENST00000227507.2:c.114C>G	ENSP00000227507.2:p.Cys38Trp	deleterious(0.02)	benign(0.089)	24.3	0	5.24769e-05	0	0	0	0	0	1	1	0
chr11	69462818	G	A	CCND1	rs756509430	missense_variant	ENSG00000110092	ENST00000227507.2:c.631G>A	ENSP00000227507.2:p.Ala211Thr	deleterious(0)	probably_damaging(1)	34	0	5.24769e-05	0	1	1	0	0	0	0	0
chr11	69462849	A	G	CCND1	NA	missense_variant	ENSG00000110092	ENST00000227507.2:c.662A>G	ENSP00000227507.2:p.Asn221Ser	tolerated(0.79)	benign(0)	6.852	0	5.24769e-05	0	0	0	0	0	1	1	0
chr11	69462876	C	T	CCND1	NA	missense_variant	ENSG00000110092	ENST00000227507.2:c.689C>T	ENSP00000227507.2:p.Thr230Ile	tolerated(0.27)	probably_damaging(0.981)	25.2	0	5.24769e-05	0	0	0	0	0	1	1	0
chr11	69466010	T	C	CCND1	NA	missense_variant	ENSG00000110092	ENST00000227507.2:c.848T>C	ENSP00000227507.2:p.Leu283Pro	tolerated(0.21)	probably_damaging(0.966)	24.7	0	5.24769e-05	0	1	1	0	0	0	0	0
chr12	115109702	G	C	TBX3	NA	missense_variant	ENSG00000135111	ENST00000257566.3:c.2176C>G	ENSP00000257566.3:p.Arg726Gly	deleterious(0)	probably_damaging(0.998)	29.4	0	5.24769e-05	0	1	1	0	0	0	0	0
chr12	115112040	G	A	TBX3	NA	missense_variant	ENSG00000135111	ENST00000257566.3:c.1700C>T	ENSP00000257566.3:p.Ala567Val	deleterious(0.05)	benign(0.242)	23.8	0	5.24769e-05	0	1	1	0	0	0	0	0
chr12	115112086	C	T	TBX3	COSM201538	missense_variant	ENSG00000135111	ENST00000257566.3:c.1654G>A	ENSP00000257566.3:p.Gly552Ser	tolerated(0.08)	probably_damaging(1)	32	0	5.24769e-05	0	1	1	0	0	0	0	0
chr12	115112151	G	A	TBX3	NA	missense_variant	ENSG00000135111	ENST00000257566.3:c.1589C>T	ENSP00000257566.3:p.Ala530Val	tolerated(0.05)	possibly_damaging(0.76)	25.7	0	5.24769e-05	0	1	1	0	0	0	0	0
chr12	115112568	T	C	TBX3	NA	missense_variant	ENSG00000135111	ENST00000257566.3:c.1172A>G	ENSP00000257566.3:p.Asp391Gly	tolerated(0.37)	possibly_damaging(0.768)	23.6	0	5.24769e-05	0	1	1	0	0	0	0	0
chr12	115114141	G	T	TBX3	rs370684735	missense_variant	ENSG00000135111	ENST00000257566.3:c.1076C>A	ENSP00000257566.3:p.Thr359Asn	tolerated(0.3)	benign(0.445)	18.89	0	5.24769e-05	0	1	1	0	0	0	0	0
chr12	115114160	A	C	TBX3	NA	missense_variant	ENSG00000135111	ENST00000257566.3:c.1057T>G	ENSP00000257566.3:p.Ser353Ala	tolerated(0.27)	benign(0.004)	13.37	0	5.24769e-05	0	0	0	0	0	1	1	0
chr12	115114239	A	C	TBX3	NA	missense_variant	ENSG00000135111	ENST00000257566.3:c.978T>G	ENSP00000257566.3:p.Asp326Glu	tolerated(1)	benign(0.006)	7.822	0	5.24769e-05	0	1	1	0	0	0	0	0
chr12	115117358	C	G	TBX3	rs746325292	missense_variant	ENSG00000135111	ENST00000257566.3:c.816G>C	ENSP00000257566.3:p.Leu272Phe	deleterious(0)	possibly_damaging(0.713)	23.5	0	5.24769e-05	0	1	1	0	0	0	0	0
chr12	115118830	T	G	TBX3	COSM290293	missense_variant	ENSG00000135111	ENST00000257566.3:c.511A>C	ENSP00000257566.3:p.Met171Leu	deleterious(0.03)	probably_damaging(0.972)	24.9	0	5.24769e-05	0	1	1	0	0	0	0	0
chr12	28116385	T	A	PTHLH	NA	missense_variant	ENSG00000087494	ENST00000395872.1:c.420A>T	ENSP00000379213.1:p.Lys140Asn	deleterious(0)	probably_damaging(0.931)	24.7	0	5.24769e-05	0	1	1	0	0	0	0	0
chr12	96077374	C	A	NTN4	NA	missense_variant	ENSG00000074527	ENST00000343702.4:c.1294G>T	ENSP00000340998.4:p.Asp432Tyr	deleterious(0)	probably_damaging(0.949)	27.7	0	5.24769e-05	0	1	1	0	0	0	0	0
chr12	96077380	G	A	NTN4	NA	missense_variant	ENSG00000074527	ENST00000343702.4:c.1288C>T	ENSP00000340998.4:p.Arg430Cys	tolerated(0.06)	possibly_damaging(0.67)	26.2	0	5.24769e-05	0	0	0	0	0	1	1	0
chr12	96104366	C	T	NTN4	rs762872102	missense_variant	ENSG00000074527	ENST00000343702.4:c.1033G>A	ENSP00000340998.4:p.Val345Ile	tolerated(0.5)	benign(0.001)	3.71	0	5.24769e-05	0	1	1	0	0	0	0	0
chr12	96104380	G	T	NTN4	rs113803100	missense_variant	ENSG00000074527	ENST00000343702.4:c.1019C>A	ENSP00000340998.4:p.Thr340Asn	deleterious(0.04)	benign(0.008)	12.29	0	5.24769e-05	0	1	1	0	0	0	0	0
chr12	96107041	G	A	NTN4	NA	missense_variant	ENSG00000074527	ENST00000343702.4:c.940C>T	ENSP00000340998.4:p.Arg314Trp	deleterious(0)	probably_damaging(0.954)	32	0	5.24769e-05	0	1	1	0	0	0	0	0
chr12	96107058	G	C	NTN4	NA	missense_variant	ENSG00000074527	ENST00000343702.4:c.923C>G	ENSP00000340998.4:p.Ala308Gly	deleterious(0.03)	probably_damaging(0.986)	24	0	5.24769e-05	0	1	1	0	0	0	0	0
chr12	96180845	T	C	NTN4	NA	missense_variant	ENSG00000074527	ENST00000343702.4:c.457A>G	ENSP00000340998.4:p.Thr153Ala	deleterious(0)	possibly_damaging(0.896)	24.2	0	5.24769e-05	0	1	1	0	0	0	0	1
chr12	96180923	A	T	NTN4	NA	missense_variant	ENSG00000074527	ENST00000343702.4:c.379T>A	ENSP00000340998.4:p.Phe127Ile	deleterious(0.01)	possibly_damaging(0.792)	25.9	0	5.24769e-05	0	1	1	0	0	0	0	0
chr12	96181216	C	T	NTN4	rs146776200	missense_variant	ENSG00000074527	ENST00000343702.4:c.86G>A	ENSP00000340998.4:p.Arg29His	tolerated(0.17)	benign(0.052)	21.3	0	5.24769e-05	0	0	0	0	0	1	1	0
chr12	96181217	G	A	NTN4	NA	missense_variant	ENSG00000074527	ENST00000343702.4:c.85C>T	ENSP00000340998.4:p.Arg29Cys	tolerated(0.23)	probably_damaging(0.932)	26.2	0	5.24769e-05	0	1	1	0	0	0	0	0
chr12	96181228	C	T	NTN4	rs34684875	missense_variant	ENSG00000074527	ENST00000343702.4:c.74G>A	ENSP00000340998.4:p.Gly25Glu	tolerated(0.06)	benign(0.003)	23	0	5.24769e-05	0	1	1	0	0	0	0	0
chr14	68301870	A	T	RAD51B	NA	missense_variant	ENSG00000182185	ENST00000487270.1:c.272A>T	ENSP00000419471.1:p.Asp91Val	deleterious(0)	probably_damaging(1)	28.6	0	5.24769e-05	0	1	1	0	0	0	0	0
chr14	68301885	G	A	RAD51B	NA	missense_variant	ENSG00000182185	ENST00000487270.1:c.287G>A	ENSP00000419471.1:p.Gly96Asp	deleterious(0)	probably_damaging(1)	29.8	0	5.24769e-05	0	1	1	0	0	0	0	0
chr14	68352625	T	A	RAD51B	NA	missense_variant	ENSG00000182185	ENST00000487270.1:c.492T>A	ENSP00000419471.1:p.Phe164Leu	tolerated(0.09)	benign(0.261)	22.8	0	5.24769e-05	0	1	1	0	0	0	0	0
chr14	68352665	C	T	RAD51B	NA	missense_variant	ENSG00000182185	ENST00000487270.1:c.532C>T	ENSP00000419471.1:p.His178Tyr	tolerated(0.32)	benign(0.004)	10.86	0	5.24769e-05	0	1	1	0	0	0	0	0
chr14	68934898	G	A	RAD51B	NA	missense_variant	ENSG00000182185	ENST00000487270.1:c.967G>A	ENSP00000419471.1:p.Ala323Thr	deleterious(0.01)	probably_damaging(0.969)	33	0	5.24769e-05	0	1	1	0	0	0	0	0
chr14	69061261	C	T	RAD51B	NA	missense_variant	ENSG00000182185	ENST00000487270.1:c.1096C>T	ENSP00000419471.1:p.Pro366Ser	NA	unknown(0)	18.59	0	5.24769e-05	0	0	0	0	0	1	1	0
chr16	52473484	G	C	TOX3	NA	missense_variant	ENSG00000103460	ENST00000219746.9:c.1384C>G	ENSP00000219746.9:p.Gln462Glu	deleterious_low_confidence(0)	unknown(0)	7.995	0	5.24769e-05	0	1	1	0	0	0	0	0
chr16	52473582	G	A	TOX3	rs772796688	missense_variant	ENSG00000103460	ENST00000219746.9:c.1286C>T	ENSP00000219746.9:p.Ser429Phe	deleterious_low_confidence(0)	unknown(0)	23.4	0	5.24769e-05	0	1	1	0	0	0	0	0
chr16	52473651	T	C	TOX3	rs187946572	missense_variant	ENSG00000103460	ENST00000219746.9:c.1217A>G	ENSP00000219746.9:p.Asn406Ser	tolerated_low_confidence(0.11)	benign(0.031)	8.955	0	5.24769e-05	0	1	1	0	0	0	0	0
chr16	52473679	T	C	TOX3	NA	missense_variant	ENSG00000103460	ENST00000219746.9:c.1189A>G	ENSP00000219746.9:p.Ile397Val	deleterious_low_confidence(0.04)	benign(0.062)	8.818	0	5.24769e-05	0	0	0	0	0	1	1	0
chr16	52473802	G	C	TOX3	NA	missense_variant	ENSG00000103460	ENST00000219746.9:c.1066C>G	ENSP00000219746.9:p.Leu356Val	deleterious_low_confidence(0.02)	probably_damaging(0.952)	23.1	0	5.24769e-05	0	1	1	0	0	0	0	0
chr16	52473832	T	C	TOX3	rs747488842	missense_variant	ENSG00000103460	ENST00000219746.9:c.1036A>G	ENSP00000219746.9:p.Thr346Ala	deleterious_low_confidence(0.01)	probably_damaging(0.952)	20.8	0	5.24769e-05	0	1	1	0	0	0	0	0
chr16	52473846	C	T	TOX3	COSM703480,COSM703479	missense_variant	ENSG00000103460	ENST00000219746.9:c.1022G>A	ENSP00000219746.9:p.Arg341His	tolerated_low_confidence(0.15)	probably_damaging(0.984)	24.9	0	5.24769e-05	0	1	1	0	0	0	0	0
chr16	52473847	G	A	TOX3	NA	missense_variant	ENSG00000103460	ENST00000219746.9:c.1021C>T	ENSP00000219746.9:p.Arg341Cys	deleterious_low_confidence(0)	probably_damaging(0.988)	32	0	5.24769e-05	0	0	0	0	0	1	1	0
chr16	52473854	C	G	TOX3	NA	missense_variant	ENSG00000103460	ENST00000219746.9:c.1014G>C	ENSP00000219746.9:p.Gln338His	deleterious(0)	probably_damaging(0.976)	24.1	0	5.24769e-05	0	1	1	0	0	0	0	0
chr16	52484380	C	T	TOX3	NA	missense_variant	ENSG00000103460	ENST00000219746.9:c.487G>A	ENSP00000219746.9:p.Ala163Thr	tolerated(0.28)	benign(0.344)	14.82	0	5.24769e-05	0	0	0	0	0	1	1	4
chr16	52497878	C	A	TOX3	NA	missense_variant	ENSG00000103460	ENST00000219746.9:c.376G>T	ENSP00000219746.9:p.Asp126Tyr	deleterious(0)	probably_damaging(0.95)	27.2	0	5.24769e-05	0	1	1	0	0	0	0	0
chr16	52497940	T	C	TOX3	NA	missense_variant	ENSG00000103460	ENST00000219746.9:c.314A>G	ENSP00000219746.9:p.Gln105Arg	deleterious(0.04)	possibly_damaging(0.728)	23.2	0	5.24769e-05	0	1	1	0	0	0	0	0
chr16	52497947	T	C	TOX3	NA	missense_variant	ENSG00000103460	ENST00000219746.9:c.307A>G	ENSP00000219746.9:p.Thr103Ala	tolerated(0.36)	benign(0.031)	8.202	0	5.24769e-05	0	1	1	0	0	0	0	0
chr16	52497952	T	C	TOX3	rs775173684	missense_variant	ENSG00000103460	ENST00000219746.9:c.302A>G	ENSP00000219746.9:p.Glu101Gly	tolerated_low_confidence(0.18)	benign(0.417)	16.52	0	5.24769e-05	0	1	1	0	0	0	0	0
chr16	52497959	C	T	TOX3	COSM1519440,COSM1519439	missense_variant	ENSG00000103460	ENST00000219746.9:c.295G>A	ENSP00000219746.9:p.Gly99Arg	deleterious(0.05)	probably_damaging(0.999)	24.8	0	5.24769e-05	0	1	1	0	0	0	0	0
chr16	52497973	G	T	TOX3	COSM3510221,COSM3510220	missense_variant	ENSG00000103460	ENST00000219746.9:c.281C>A	ENSP00000219746.9:p.Pro94Gln	tolerated(0.08)	benign(0.009)	13.01	0	5.24769e-05	0	1	1	0	0	0	0	0
chr16	52497982	A	C	TOX3	NA	missense_variant	ENSG00000103460	ENST00000219746.9:c.272T>G	ENSP00000219746.9:p.Leu91Arg	deleterious(0)	possibly_damaging(0.905)	25.7	0	5.24769e-05	0	1	1	0	0	0	0	0
chr16	52497991	A	G	TOX3	NA	missense_variant	ENSG00000103460	ENST00000219746.9:c.263T>C	ENSP00000219746.9:p.Phe88Ser	deleterious(0)	probably_damaging(0.986)	26.2	0	5.24769e-05	0	1	1	0	0	0	0	0
chr16	52498000	A	G	TOX3	NA	missense_variant	ENSG00000103460	ENST00000219746.9:c.254T>C	ENSP00000219746.9:p.Leu85Pro	tolerated(0.29)	probably_damaging(0.942)	24.3	0	5.24769e-05	0	1	1	0	0	0	0	0
chr16	52498007	C	A	TOX3	NA	missense_variant	ENSG00000103460	ENST00000219746.9:c.247G>T	ENSP00000219746.9:p.Asp83Tyr	deleterious(0)	probably_damaging(0.972)	26.7	0	5.24769e-05	0	1	1	0	0	0	0	0
chr16	53859875	C	T	FTO	NA	missense_variant	ENSG00000140718	ENST00000471389.1:c.223C>T	ENSP00000418823.1:p.His75Tyr	deleterious(0.01)	possibly_damaging(0.751)	24.3	0	5.24769e-05	0	1	1	0	0	0	0	0
chr16	53859918	A	G	FTO	NA	missense_variant	ENSG00000140718	ENST00000471389.1:c.266A>G	ENSP00000418823.1:p.Asp89Gly	deleterious(0.03)	possibly_damaging(0.905)	24.8	0	5.24769e-05	0	0	0	0	0	1	1	1
chr16	53859930	C	T	FTO	rs151263395,COSM1378353	missense_variant	ENSG00000140718	ENST00000471389.1:c.278C>T	ENSP00000418823.1:p.Pro93Leu	deleterious(0.02)	probably_damaging(1)	26.9	0	5.24769e-05	0	1	1	0	0	0	0	1
chr16	53860023	A	G	FTO	NA	missense_variant	ENSG00000140718	ENST00000471389.1:c.371A>G	ENSP00000418823.1:p.Asn124Ser	tolerated(0.44)	benign(0.002)	0.002	0	5.24769e-05	0	1	1	0	0	0	0	0
chr16	53860082	G	A	FTO	rs201086068	missense_variant	ENSG00000140718	ENST00000471389.1:c.430G>A	ENSP00000418823.1:p.Asp144Asn	tolerated(0.16)	possibly_damaging(0.486)	23.8	0	5.24769e-05	0	1	1	0	0	0	0	0
chr16	53860136	A	G	FTO	NA	missense_variant	ENSG00000140718	ENST00000471389.1:c.484A>G	ENSP00000418823.1:p.Lys162Glu	tolerated(0.2)	benign(0.024)	19.38	0	5.24769e-05	0	1	1	0	0	0	0	1
chr16	53860269	T	C	FTO	NA	missense_variant	ENSG00000140718	ENST00000471389.1:c.617T>C	ENSP00000418823.1:p.Phe206Ser	deleterious(0)	probably_damaging(0.95)	27.8	0	5.24769e-05	0	0	0	0	0	1	1	0
chr16	53967931	G	A	FTO	rs376527078	missense_variant	ENSG00000140718	ENST00000471389.1:c.1274G>A	ENSP00000418823.1:p.Gly425Glu	tolerated(0.99)	benign(0.014)	14.64	0	5.24769e-05	0	0	0	0	0	1	1	0
chr16	53967981	C	T	FTO	NA	missense_variant	ENSG00000140718	ENST00000471389.1:c.1324C>T	ENSP00000418823.1:p.Leu442Phe	deleterious(0)	possibly_damaging(0.907)	26.8	0	5.24769e-05	0	0	0	0	0	1	1	0
chr16	54145721	A	G	FTO	rs771859785	missense_variant	ENSG00000140718	ENST00000471389.1:c.1412A>G	ENSP00000418823.1:p.Glu471Gly	tolerated(0.31)	benign(0.16)	19.08	0	5.24769e-05	0	1	1	0	0	0	0	0
chr16	80638354	C	G	CDYL2	rs377083708	missense_variant	ENSG00000166446	ENST00000570137.2:c.1452G>C	ENSP00000476295.1:p.Gln484His	deleterious(0)	probably_damaging(0.995)	24.3	0	5.24769e-05	0	1	1	0	0	0	0	0
chr16	80638368	G	C	CDYL2	rs202026090	missense_variant	ENSG00000166446	ENST00000570137.2:c.1438C>G	ENSP00000476295.1:p.Leu480Val	tolerated(0.05)	benign(0.006)	6.436	0	5.24769e-05	0	1	1	0	0	0	0	0
chr16	80638400	G	A	CDYL2	NA	missense_variant	ENSG00000166446	ENST00000570137.2:c.1406C>T	ENSP00000476295.1:p.Ser469Leu	tolerated(0.42)	probably_damaging(0.982)	24.3	0	5.24769e-05	0	1	1	0	0	0	0	0
chr16	80638416	G	A	CDYL2	COSM4063038	missense_variant	ENSG00000166446	ENST00000570137.2:c.1390C>T	ENSP00000476295.1:p.Arg464Trp	deleterious(0)	probably_damaging(1)	33	0	5.24769e-05	0	1	1	0	0	0	0	0
chr16	80654681	G	A	CDYL2	NA	missense_variant	ENSG00000166446	ENST00000570137.2:c.986C>T	ENSP00000476295.1:p.Thr329Ile	tolerated(0.38)	benign(0.387)	18.4	0	5.24769e-05	0	1	1	0	0	0	0	0
chr16	80654724	A	T	CDYL2	NA	missense_variant	ENSG00000166446	ENST00000570137.2:c.943T>A	ENSP00000476295.1:p.Tyr315Asn	tolerated(0.07)	probably_damaging(0.996)	24.2	0	5.24769e-05	0	1	1	0	0	0	0	0
chr16	80667127	G	T	CDYL2	rs770332841,COSM279795	missense_variant	ENSG00000166446	ENST00000570137.2:c.623C>A	ENSP00000476295.1:p.Ala208Asp	tolerated(0.11)	benign(0.051)	19.96	0	5.24769e-05	0	1	1	0	0	0	0	1
chr16	80667128	C	G	CDYL2	NA	missense_variant	ENSG00000166446	ENST00000570137.2:c.622G>C	ENSP00000476295.1:p.Ala208Pro	tolerated(0.1)	benign(0)	15.18	0	5.24769e-05	0	1	1	0	0	0	0	1
chr16	80718522	G	A	CDYL2	NA	missense_variant	ENSG00000166446	ENST00000570137.2:c.529C>T	ENSP00000476295.1:p.Pro177Ser	tolerated(0.13)	benign(0.021)	10.55	0	5.24769e-05	0	1	1	0	0	0	0	0
chr16	80718523	C	A	CDYL2	NA	missense_variant	ENSG00000166446	ENST00000570137.2:c.528G>T	ENSP00000476295.1:p.Gln176His	tolerated(0.05)	benign(0.117)	18.91	0	5.24769e-05	0	1	1	0	0	0	0	0
chr16	80718623	C	T	CDYL2	rs755893807	missense_variant	ENSG00000166446	ENST00000570137.2:c.428G>A	ENSP00000476295.1:p.Gly143Asp	deleterious(0)	probably_damaging(0.98)	24.8	0	5.24769e-05	0	1	1	0	0	0	0	0
chr16	80718624	C	T	CDYL2	NA	missense_variant	ENSG00000166446	ENST00000570137.2:c.427G>A	ENSP00000476295.1:p.Gly143Ser	deleterious(0.04)	probably_damaging(0.922)	24.3	0	5.24769e-05	0	1	1	0	0	0	0	0
chr16	80718674	G	A	CDYL2	NA	missense_variant	ENSG00000166446	ENST00000570137.2:c.377C>T	ENSP00000476295.1:p.Ser126Leu	tolerated(0.74)	benign(0.031)	0.585	0	5.24769e-05	0	1	1	0	0	0	0	1
chr16	80718696	C	G	CDYL2	NA	missense_variant	ENSG00000166446	ENST00000570137.2:c.355G>C	ENSP00000476295.1:p.Gly119Arg	tolerated(0.58)	possibly_damaging(0.851)	22.5	0	5.24769e-05	0	0	0	0	0	1	1	1
chr16	80718710	G	A	CDYL2	rs750885476	missense_variant	ENSG00000166446	ENST00000570137.2:c.341C>T	ENSP00000476295.1:p.Ala114Val	tolerated(0.26)	benign(0.013)	8.815	0	5.24769e-05	0	1	1	0	0	0	0	1
chr16	80718751	C	G	CDYL2	NA	missense_variant	ENSG00000166446	ENST00000570137.2:c.300G>C	ENSP00000476295.1:p.Lys100Asn	tolerated(0.25)	benign(0.253)	8.602	0	5.24769e-05	0	1	1	0	0	0	0	0
chr16	80718872	A	G	CDYL2	NA	missense_variant	ENSG00000166446	ENST00000570137.2:c.179T>C	ENSP00000476295.1:p.Met60Thr	tolerated(1)	benign(0)	0.218	0	5.24769e-05	0	1	1	0	0	0	0	0
chr16	80718884	T	C	CDYL2	rs765533695	missense_variant	ENSG00000166446	ENST00000570137.2:c.167A>G	ENSP00000476295.1:p.Asn56Ser	deleterious(0)	probably_damaging(0.998)	24.6	0	5.24769e-05	0	1	1	0	0	0	0	0
chr16	80718968	C	G	CDYL2	NA	missense_variant	ENSG00000166446	ENST00000570137.2:c.83G>C	ENSP00000476295.1:p.Arg28Pro	deleterious(0)	probably_damaging(0.982)	33	0	5.24769e-05	0	1	1	0	0	0	0	0
chr17	53045661	A	C	COX11	NA	missense_variant	ENSG00000166260	ENST00000299335.3:c.347T>G	ENSP00000299335.3:p.Leu116Arg	deleterious(0)	probably_damaging(0.999)	25.6	0	5.24769e-05	0	1	1	0	0	0	0	0
chr17	53045747	C	A	COX11	rs536849346	missense_variant	ENSG00000166260	ENST00000299335.3:c.261G>T	ENSP00000299335.3:p.Glu87Asp	tolerated(0.81)	benign(0.001)	0.003	0	5.24769e-05	0	1	1	0	0	0	0	0
chr17	53045763	C	T	COX11	NA	missense_variant	ENSG00000166260	ENST00000299335.3:c.245G>A	ENSP00000299335.3:p.Arg82His	deleterious(0.03)	possibly_damaging(0.749)	29.7	0	5.24769e-05	0	0	0	0	0	1	1	1
chr17	53045764	G	C	COX11	NA	missense_variant	ENSG00000166260	ENST00000299335.3:c.244C>G	ENSP00000299335.3:p.Arg82Gly	deleterious(0.02)	benign(0.046)	22.9	0	5.24769e-05	0	1	1	0	0	0	0	1
chr17	53045793	C	T	COX11	NA	missense_variant	ENSG00000166260	ENST00000299335.3:c.215G>A	ENSP00000299335.3:p.Arg72Gln	tolerated(0.21)	possibly_damaging(0.467)	25.2	0	5.24769e-05	0	1	1	0	0	0	0	1
chr17	53045812	G	C	COX11	COSM1750172	missense_variant	ENSG00000166260	ENST00000299335.3:c.196C>G	ENSP00000299335.3:p.Pro66Ala	tolerated(0.5)	benign(0.005)	0.001	0	5.24769e-05	0	1	1	0	0	0	0	1
chr2	174228080	C	T	CDCA7	rs780814022	missense_variant	ENSG00000144354	ENST00000306721.3:c.511C>T	ENSP00000306968.3:p.Arg171Cys	deleterious(0.04)	possibly_damaging(0.498)	25.1	0	5.24769e-05	0	1	1	0	0	0	0	0
chr2	174228081	G	T	CDCA7	COSM319354	missense_variant	ENSG00000144354	ENST00000306721.3:c.512G>T	ENSP00000306968.3:p.Arg171Leu	tolerated(0.43)	benign(0.066)	13.73	0	5.24769e-05	0	0	0	0	0	1	1	2
chr2	174228142	G	T	CDCA7	COSM3425474,COSM3570093	missense_variant	ENSG00000144354	ENST00000306721.3:c.573G>T	ENSP00000306968.3:p.Met191Ile	tolerated(0.12)	benign(0.037)	22.1	0	5.24769e-05	0	1	1	0	0	0	0	0
chr2	174228603	C	T	CDCA7	rs767821525	missense_variant	ENSG00000144354	ENST00000306721.3:c.679C>T	ENSP00000306968.3:p.Pro227Ser	tolerated(1)	benign(0.001)	4.97	0	5.24769e-05	0	0	0	0	0	1	1	0
chr2	174229707	G	A	CDCA7	NA	missense_variant	ENSG00000144354	ENST00000306721.3:c.884G>A	ENSP00000306968.3:p.Gly295Asp	tolerated(0.18)	benign(0.005)	9.665	0	5.24769e-05	0	1	1	0	0	0	0	0
chr2	174230189	C	G	CDCA7	rs113040501	missense_variant	ENSG00000144354	ENST00000306721.3:c.904C>G	ENSP00000306968.3:p.Leu302Val	tolerated(0.56)	benign(0.001)	4.706	0	5.24769e-05	0	1	1	0	0	0	0	2
chr2	174230201	C	T	CDCA7	rs763027787	missense_variant	ENSG00000144354	ENST00000306721.3:c.916C>T	ENSP00000306968.3:p.Arg306Cys	deleterious(0.02)	probably_damaging(0.947)	34	0	5.24769e-05	0	1	1	0	0	0	0	0
chr2	174230279	G	A	CDCA7	rs751677219	missense_variant	ENSG00000144354	ENST00000306721.3:c.994G>A	ENSP00000306968.3:p.Val332Ile	tolerated(1)	benign(0.013)	12.53	0	5.24769e-05	0	0	0	0	0	1	1	2
chr2	174231086	G	A	CDCA7	rs199654527	missense_variant	ENSG00000144354	ENST00000306721.3:c.1111G>A	ENSP00000306968.3:p.Val371Ile	tolerated(0.09)	benign(0.341)	23.1	0	5.24769e-05	0	1	1	0	0	0	0	0
chr2	174231117	G	A	CDCA7	rs748528043,COSM1009703	missense_variant	ENSG00000144354	ENST00000306721.3:c.1142G>A	ENSP00000306968.3:p.Arg381Gln	deleterious(0)	probably_damaging(0.991)	35	0	5.24769e-05	0	1	1	0	0	0	0	0
chr2	202123024	A	G	CASP8	NA	missense_variant	ENSG00000064012	ENST00000358485.4:c.70A>G	ENSP00000351273.4:p.Thr24Ala	tolerated_low_confidence(0.76)	benign(0.009)	0.002	0	5.24769e-05	0	1	1	0	0	0	0	0
chr2	202123028	C	A	CASP8	rs34210251	missense_variant	ENSG00000064012	ENST00000358485.4:c.74C>A	ENSP00000351273.4:p.Pro25His	deleterious_low_confidence(0)	probably_damaging(0.979)	16.85	0	5.24769e-05	0	1	1	0	0	0	0	0
chr2	202123032	C	A	CASP8	rs748514005	missense_variant	ENSG00000064012	ENST00000358485.4:c.78C>A	ENSP00000351273.4:p.Phe26Leu	deleterious_low_confidence(0)	benign(0)	4.311	0	5.24769e-05	0	1	1	0	0	0	0	0
chr2	202131294	T	C	CASP8	NA	missense_variant	ENSG00000064012	ENST00000358485.4:c.262T>C	ENSP00000351273.4:p.Tyr88His	tolerated(1)	benign(0.002)	0.001	0	5.24769e-05	0	0	0	0	0	1	1	0
chr2	202131303	C	G	CASP8	NA	missense_variant	ENSG00000064012	ENST00000358485.4:c.271C>G	ENSP00000351273.4:p.Gln91Glu	tolerated(0.27)	benign(0.268)	0.034	0	5.24769e-05	0	0	0	0	0	1	1	0
chr2	202136313	A	G	CASP8	NA	missense_variant	ENSG00000064012	ENST00000358485.4:c.557A>G	ENSP00000351273.4:p.Glu186Gly	deleterious(0.03)	possibly_damaging(0.848)	20.5	0	5.24769e-05	0	0	0	0	0	1	1	16
chr2	202149557	T	C	CASP8	COSM141010	missense_variant	ENSG00000064012	ENST00000358485.4:c.998T>C	ENSP00000351273.4:p.Phe333Ser	deleterious(0)	probably_damaging(1)	26.5	0	5.24769e-05	0	1	1	0	0	0	0	0
chr2	202149560	A	G	CASP8	NA	missense_variant	ENSG00000064012	ENST00000358485.4:c.1001A>G	ENSP00000351273.4:p.Glu334Gly	tolerated(0.08)	benign(0.003)	0.034	0	5.24769e-05	0	1	1	0	0	0	0	0
chr2	202149589	G	A	CASP8	CM043455,rs1045485,COSM3757877,COSM3757876,COSM3757875	missense_variant	ENSG00000064012	ENST00000358485.4:c.1030G>A	ENSP00000351273.4:p.Asp344Asn	tolerated(0.42)	benign(0)	0.091	0	5.24769e-05	0	1	1	0	0	0	0	0
chr2	202149620	T	C	CASP8	NA	missense_variant	ENSG00000064012	ENST00000358485.4:c.1061T>C	ENSP00000351273.4:p.Ile354Thr	tolerated(0.58)	benign(0.025)	0.021	0	5.24769e-05	0	0	0	0	0	1	1	0
chr2	202149632	A	G	CASP8	NA	missense_variant	ENSG00000064012	ENST00000358485.4:c.1073A>G	ENSP00000351273.4:p.Tyr358Cys	deleterious(0)	probably_damaging(0.99)	22.7	0	5.24769e-05	0	0	0	0	0	1	1	0
chr2	202149751	C	G	CASP8	COSM159758,COSM3798503,COSM3798502	missense_variant	ENSG00000064012	ENST00000358485.4:c.1192C>G	ENSP00000351273.4:p.Gln398Glu	tolerated(0.16)	benign(0.278)	12.2	0	5.24769e-05	0	1	1	0	0	0	0	0
chr2	202149835	A	C	CASP8	NA	missense_variant	ENSG00000064012	ENST00000358485.4:c.1276A>C	ENSP00000351273.4:p.Lys426Gln	tolerated(0.29)	benign(0.021)	7.464	0	5.24769e-05	0	1	1	0	0	0	0	0
chr2	202151213	G	A	CASP8	NA	missense_variant	ENSG00000064012	ENST00000358485.4:c.1513G>A	ENSP00000351273.4:p.Val505Met	deleterious(0.01)	probably_damaging(0.957)	29	0	5.24769e-05	0	1	1	0	0	0	0	0
chr2	217543591	C	T	IGFBP5	rs186441774	missense_variant	ENSG00000115461	ENST00000233813.4:c.549G>A	ENSP00000233813.4:p.Met183Ile	tolerated(0.46)	benign(0.001)	15.61	0	5.24769e-05	0	1	1	0	0	0	0	0
chr2	217543614	G	C	IGFBP5	rs763073487,COSM1163722	missense_variant	ENSG00000115461	ENST00000233813.4:c.526C>G	ENSP00000233813.4:p.Arg176Gly	tolerated(0.18)	benign(0.241)	18.75	0	5.24769e-05	0	1	1	0	0	0	0	0
chr2	217543626	T	G	IGFBP5	NA	missense_variant	ENSG00000115461	ENST00000233813.4:c.514A>C	ENSP00000233813.4:p.Thr172Pro	tolerated(0.24)	benign(0.022)	20.6	0	5.24769e-05	0	1	1	0	0	0	0	0
chr2	217543652	G	A	IGFBP5	rs757553693	missense_variant	ENSG00000115461	ENST00000233813.4:c.488C>T	ENSP00000233813.4:p.Ser163Phe	tolerated(0.4)	benign(0.396)	21.2	0	5.24769e-05	0	1	1	0	0	0	0	0
chr2	217543713	G	A	IGFBP5	NA	missense_variant	ENSG00000115461	ENST00000233813.4:c.427C>T	ENSP00000233813.4:p.Arg143Cys	tolerated(0.09)	possibly_damaging(0.582)	28.1	0	5.24769e-05	0	1	1	0	0	0	0	0
chr2	217543722	T	G	IGFBP5	NA	missense_variant	ENSG00000115461	ENST00000233813.4:c.418A>C	ENSP00000233813.4:p.Lys140Gln	tolerated(0.33)	benign(0.114)	17.42	0	5.24769e-05	0	0	0	0	0	1	1	0
chr2	217559180	G	A	IGFBP5	NA	missense_variant	ENSG00000115461	ENST00000233813.4:c.319C>T	ENSP00000233813.4:p.Arg107Cys	deleterious(0)	possibly_damaging(0.462)	32	0	5.24769e-05	0	0	0	0	0	1	1	1
chr2	217559195	T	C	IGFBP5	NA	missense_variant	ENSG00000115461	ENST00000233813.4:c.304A>G	ENSP00000233813.4:p.Asn102Asp	tolerated(0.06)	possibly_damaging(0.694)	27	0	5.24769e-05	0	1	1	0	0	0	0	1
chr2	217559225	C	T	IGFBP5	NA	missense_variant	ENSG00000115461	ENST00000233813.4:c.274G>A	ENSP00000233813.4:p.Ala92Thr	tolerated(0.07)	possibly_damaging(0.465)	26.6	0	5.24769e-05	0	1	1	0	0	0	0	0
chr2	217559239	T	C	IGFBP5	NA	missense_variant	ENSG00000115461	ENST00000233813.4:c.260A>G	ENSP00000233813.4:p.Glu87Gly	deleterious(0.03)	probably_damaging(0.963)	29.4	0	5.24769e-05	0	1	1	0	0	0	0	0
chr2	217559272	T	G	IGFBP5	NA	missense_variant	ENSG00000115461	ENST00000233813.4:c.227A>C	ENSP00000233813.4:p.Gln76Pro	tolerated(0.09)	possibly_damaging(0.723)	23.6	0	5.24769e-05	0	1	1	0	0	0	0	0
chr2	217559312	C	T	IGFBP5	NA	missense_variant	ENSG00000115461	ENST00000233813.4:c.187G>A	ENSP00000233813.4:p.Glu63Lys	deleterious(0.01)	probably_damaging(0.974)	33	0	5.24769e-05	0	1	1	0	0	0	0	0
chr2	217559384	G	A	IGFBP5	rs779879411	missense_variant	ENSG00000115461	ENST00000233813.4:c.115C>T	ENSP00000233813.4:p.Pro39Ser	deleterious(0)	probably_damaging(1)	26.1	0	5.24769e-05	0	1	1	0	0	0	0	0
chr2	217559405	C	T	IGFBP5	NA	missense_variant	ENSG00000115461	ENST00000233813.4:c.94G>A	ENSP00000233813.4:p.Glu32Lys	tolerated(0.19)	benign(0.021)	23.5	0	5.24769e-05	0	0	0	0	0	1	1	0
chr2	217559408	C	T	IGFBP5	rs772834319	missense_variant	ENSG00000115461	ENST00000233813.4:c.91G>A	ENSP00000233813.4:p.Asp31Asn	deleterious(0.01)	probably_damaging(0.996)	34	0	5.24769e-05	0	1	1	0	0	0	0	0
chr22	40807602	G	T	MKL1	rs769089004	missense_variant	ENSG00000196588	ENST00000355630.3:c.2588C>A	ENSP00000347847.3:p.Thr863Asn	deleterious(0)	probably_damaging(0.977)	27	0	5.24769e-05	0	1	1	0	0	0	0	0
chr22	40807617	G	C	MKL1	rs143437226,COSM1416433	missense_variant	ENSG00000196588	ENST00000355630.3:c.2573C>G	ENSP00000347847.3:p.Pro858Arg	tolerated(0.38)	probably_damaging(0.997)	24.1	0	5.24769e-05	0	1	1	0	0	0	0	0
chr22	40807707	G	C	MKL1	rs762399447	missense_variant	ENSG00000196588	ENST00000355630.3:c.2483C>G	ENSP00000347847.3:p.Thr828Ser	tolerated(0.51)	probably_damaging(0.952)	13.13	0	5.24769e-05	0	1	1	0	0	0	0	0
chr22	40807797	G	A	MKL1	rs747279423	missense_variant	ENSG00000196588	ENST00000355630.3:c.2393C>T	ENSP00000347847.3:p.Pro798Leu	tolerated(0.05)	benign(0.09)	12.95	0	5.24769e-05	0	1	1	0	0	0	0	0
chr22	40807848	G	A	MKL1	rs761486678	missense_variant	ENSG00000196588	ENST00000355630.3:c.2342C>T	ENSP00000347847.3:p.Thr781Ile	deleterious(0.01)	benign(0.004)	12.97	0	5.24769e-05	0	0	0	0	0	1	1	0
chr22	40813374	C	T	MKL1	NA	missense_variant	ENSG00000196588	ENST00000355630.3:c.2188G>A	ENSP00000347847.3:p.Glu730Lys	deleterious(0.01)	probably_damaging(0.952)	34	0	5.24769e-05	0	1	1	0	0	0	0	0
chr22	40813434	G	T	MKL1	NA	missense_variant	ENSG00000196588	ENST00000355630.3:c.2128C>A	ENSP00000347847.3:p.Leu710Met	tolerated(0.22)	benign(0.087)	0.054	0	5.24769e-05	0	1	1	0	0	0	0	0
chr22	40814498	G	T	MKL1	NA	missense_variant	ENSG00000196588	ENST00000355630.3:c.1944C>A	ENSP00000347847.3:p.Ser648Arg	tolerated(0.23)	benign(0.174)	9.045	0	5.24769e-05	0	1	1	0	0	0	0	0
chr22	40814542	G	C	MKL1	rs115175354	missense_variant	ENSG00000196588	ENST00000355630.3:c.1900C>G	ENSP00000347847.3:p.Pro634Ala	tolerated(0.18)	benign(0.001)	0.013	0	5.24769e-05	0	1	1	0	0	0	0	0
chr22	40814827	G	A	MKL1	NA	missense_variant	ENSG00000196588	ENST00000355630.3:c.1615C>T	ENSP00000347847.3:p.Arg539Cys	deleterious(0)	probably_damaging(0.988)	32	0	5.24769e-05	0	1	1	0	0	0	0	2
chr22	40814904	C	A	MKL1	COSM3405687	missense_variant	ENSG00000196588	ENST00000355630.3:c.1538G>T	ENSP00000347847.3:p.Gly513Val	tolerated(0.12)	possibly_damaging(0.517)	23.2	0	5.24769e-05	0	1	1	0	0	0	0	0
chr22	40814916	C	T	MKL1	rs564479912	missense_variant	ENSG00000196588	ENST00000355630.3:c.1526G>A	ENSP00000347847.3:p.Cys509Tyr	deleterious(0.01)	probably_damaging(0.982)	23.8	0	5.24769e-05	0	1	1	0	0	0	0	0
chr22	40815066	T	C	MKL1	NA	missense_variant	ENSG00000196588	ENST00000355630.3:c.1376A>G	ENSP00000347847.3:p.Glu459Gly	deleterious(0)	possibly_damaging(0.787)	25	0	5.24769e-05	0	1	1	0	0	0	0	0
chr22	40815138	G	A	MKL1	NA	missense_variant	ENSG00000196588	ENST00000355630.3:c.1304C>T	ENSP00000347847.3:p.Thr435Met	deleterious(0)	probably_damaging(0.993)	32	0	5.24769e-05	0	1	1	0	0	0	0	1
chr22	40815201	C	T	MKL1	rs557877019	missense_variant	ENSG00000196588	ENST00000355630.3:c.1241G>A	ENSP00000347847.3:p.Arg414Gln	tolerated(0.12)	probably_damaging(0.945)	23.7	0	5.24769e-05	0	1	1	0	0	0	0	1
chr22	40815287	G	T	MKL1	rs776339457	missense_variant	ENSG00000196588	ENST00000355630.3:c.1155C>A	ENSP00000347847.3:p.Ser385Arg	deleterious(0)	benign(0.143)	18.67	0	5.24769e-05	0	1	1	0	0	0	0	0
chr22	40815306	G	A	MKL1	rs375153992	missense_variant	ENSG00000196588	ENST00000355630.3:c.1136C>T	ENSP00000347847.3:p.Ala379Val	deleterious(0.01)	benign(0.082)	23	0	5.24769e-05	0	0	0	0	0	1	1	0
chr22	40815309	C	T	MKL1	rs138830176	missense_variant	ENSG00000196588	ENST00000355630.3:c.1133G>A	ENSP00000347847.3:p.Arg378Gln	deleterious(0)	probably_damaging(0.986)	29.3	0	5.24769e-05	0	1	1	0	0	0	0	0
chr22	40816474	G	A	MKL1	COSM727058	missense_variant	ENSG00000196588	ENST00000355630.3:c.988C>T	ENSP00000347847.3:p.Arg330Cys	deleterious(0)	probably_damaging(0.988)	34	0	5.24769e-05	0	1	1	0	0	0	0	0
chr22	40816521	G	A	MKL1	rs773732518	missense_variant	ENSG00000196588	ENST00000355630.3:c.941C>T	ENSP00000347847.3:p.Thr314Ile	tolerated(0.05)	benign(0.042)	1.68	0	5.24769e-05	0	1	1	0	0	0	0	0
chr22	40816542	G	A	MKL1	rs771550496	missense_variant	ENSG00000196588	ENST00000355630.3:c.920C>T	ENSP00000347847.3:p.Pro307Leu	tolerated(0.13)	benign(0)	5.329	0	5.24769e-05	0	1	1	0	0	0	0	0
chr22	40816545	G	T	MKL1	rs144872390	missense_variant	ENSG00000196588	ENST00000355630.3:c.917C>A	ENSP00000347847.3:p.Pro306His	deleterious(0.03)	possibly_damaging(0.514)	16.39	0	5.24769e-05	0	0	0	0	0	1	1	0
chr22	40816567	C	A	MKL1	NA	missense_variant	ENSG00000196588	ENST00000355630.3:c.895G>T	ENSP00000347847.3:p.Ala299Ser	tolerated(0.53)	benign(0.014)	1.383	0	5.24769e-05	0	1	1	0	0	0	0	0
chr22	40816852	T	C	MKL1	NA	missense_variant	ENSG00000196588	ENST00000355630.3:c.880A>G	ENSP00000347847.3:p.Lys294Glu	deleterious(0)	probably_damaging(0.952)	25.9	0	5.24769e-05	0	1	1	0	0	0	0	3
chr22	40816857	G	A	MKL1	NA	missense_variant	ENSG00000196588	ENST00000355630.3:c.875C>T	ENSP00000347847.3:p.Pro292Leu	deleterious(0.01)	probably_damaging(0.992)	29.3	0	5.24769e-05	0	1	1	0	0	0	0	3
chr22	40816967	C	T	MKL1	NA	missense_variant	ENSG00000196588	ENST00000355630.3:c.765G>A	ENSP00000347847.3:p.Met255Ile	deleterious(0)	benign(0.004)	23.5	0	5.24769e-05	0	1	1	0	0	0	0	0
chr22	40819556	G	A	MKL1	NA	missense_variant	ENSG00000196588	ENST00000355630.3:c.611C>T	ENSP00000347847.3:p.Thr204Ile	tolerated(0.05)	benign(0.022)	23.3	0	5.24769e-05	0	1	1	0	0	0	0	0
chr22	40819619	G	A	MKL1	NA	missense_variant	ENSG00000196588	ENST00000355630.3:c.548C>T	ENSP00000347847.3:p.Pro183Leu	deleterious(0.01)	benign(0.081)	22.9	0	5.24769e-05	0	1	1	0	0	0	0	0
chr22	40820278	C	T	MKL1	NA	missense_variant	ENSG00000196588	ENST00000355630.3:c.409G>A	ENSP00000347847.3:p.Val137Met	deleterious(0.01)	benign(0.009)	24.6	0	5.24769e-05	0	0	0	0	0	1	1	0
chr22	40820305	G	A	MKL1	NA	missense_variant	ENSG00000196588	ENST00000355630.3:c.382C>T	ENSP00000347847.3:p.Pro128Ser	deleterious(0)	probably_damaging(0.986)	31	0	5.24769e-05	0	1	1	0	0	0	0	0
chr22	40820346	G	A	MKL1	NA	missense_variant	ENSG00000196588	ENST00000355630.3:c.341C>T	ENSP00000347847.3:p.Ser114Phe	deleterious(0.02)	probably_damaging(0.982)	32	0	5.24769e-05	0	1	1	0	0	0	0	4
chr22	40825699	T	C	MKL1	NA	missense_variant	ENSG00000196588	ENST00000355630.3:c.212A>G	ENSP00000347847.3:p.Asn71Ser	deleterious(0)	probably_damaging(0.987)	25.7	0	5.24769e-05	0	1	1	0	0	0	0	4
chr22	40827438	G	C	MKL1	rs780837181,COSM3554847	missense_variant	ENSG00000196588	ENST00000355630.3:c.110C>G	ENSP00000347847.3:p.Ser37Trp	deleterious(0)	possibly_damaging(0.836)	34	0	5.24769e-05	0	1	1	0	0	0	0	0
chr3	27257333	A	G	NEK10	NA	missense_variant	ENSG00000163491	ENST00000341435.5:c.2129T>C	ENSP00000343847.5:p.Leu710Pro	deleterious_low_confidence(0)	unknown(0)	20.5	0	5.24769e-05	0	1	1	0	0	0	0	0
chr3	27257343	C	G	NEK10	NA	missense_variant	ENSG00000163491	ENST00000341435.5:c.2119G>C	ENSP00000343847.5:p.Ala707Pro	deleterious_low_confidence(0)	unknown(0)	11.77	0	5.24769e-05	0	1	1	0	0	0	0	0
chr3	27257352	G	A	NEK10	rs778374528	missense_variant	ENSG00000163491	ENST00000341435.5:c.2110C>T	ENSP00000343847.5:p.Arg704Cys	tolerated_low_confidence(0.09)	unknown(0)	16.13	0	5.24769e-05	0	0	0	0	0	1	1	0
chr3	27332142	T	C	NEK10	NA	missense_variant	ENSG00000163491	ENST00000341435.5:c.1709A>G	ENSP00000343847.5:p.Asn570Ser	tolerated(0.38)	benign(0.004)	9.529	0	5.24769e-05	0	1	1	0	0	0	0	1
chr3	27332164	C	T	NEK10	rs746153882	missense_variant	ENSG00000163491	ENST00000341435.5:c.1687G>A	ENSP00000343847.5:p.Asp563Asn	tolerated(0.1)	benign(0.363)	23.3	0	5.24769e-05	0	1	1	0	0	0	0	0
chr3	27332800	C	T	NEK10	NA	missense_variant	ENSG00000163491	ENST00000341435.5:c.1558G>A	ENSP00000343847.5:p.Ala520Thr	deleterious(0.03)	possibly_damaging(0.852)	26	0	5.24769e-05	0	1	1	0	0	0	0	0
chr3	27332808	C	T	NEK10	NA	missense_variant	ENSG00000163491	ENST00000341435.5:c.1550G>A	ENSP00000343847.5:p.Gly517Asp	deleterious(0.02)	possibly_damaging(0.571)	25.6	0	5.24769e-05	0	1	1	0	0	0	0	0
chr3	27332811	A	G	NEK10	NA	missense_variant	ENSG00000163491	ENST00000341435.5:c.1547T>C	ENSP00000343847.5:p.Ile516Thr	deleterious(0)	probably_damaging(0.984)	27.6	0	5.24769e-05	0	0	0	0	0	1	1	0
chr3	27333021	T	C	NEK10	NA	missense_variant	ENSG00000163491	ENST00000341435.5:c.1430A>G	ENSP00000343847.5:p.Asp477Gly	deleterious(0)	probably_damaging(0.933)	25.4	0	5.24769e-05	0	1	1	0	0	0	0	0
chr3	27346314	C	T	NEK10	rs776763681	missense_variant	ENSG00000163491	ENST00000341435.5:c.952G>A	ENSP00000343847.5:p.Val318Ile	tolerated(0.14)	benign(0.003)	19.75	0	5.24769e-05	0	1	1	0	0	0	0	0
chr3	27387638	C	T	NEK10	NA	missense_variant	ENSG00000163491	ENST00000341435.5:c.202G>A	ENSP00000343847.5:p.Gly68Arg	tolerated_low_confidence(0.27)	benign(0.093)	19.77	0	5.24769e-05	0	0	0	0	0	1	1	0
chr3	30713252	C	T	TGFBR2	rs61762550	missense_variant	ENSG00000163513	ENST00000359013.4:c.652C>T	ENSP00000351905.4:p.Arg218Trp	deleterious(0.01)	possibly_damaging(0.836)	34	0	5.24769e-05	0	1	1	0	0	0	0	0
chr3	30713300	C	T	TGFBR2	NA	missense_variant	ENSG00000163513	ENST00000359013.4:c.700C>T	ENSP00000351905.4:p.Leu234Phe	tolerated(0.7)	benign(0.003)	1.491	0	5.24769e-05	0	0	0	0	0	1	1	0
chr3	30713711	G	A	TGFBR2	NA	missense_variant	ENSG00000163513	ENST00000359013.4:c.1111G>A	ENSP00000351905.4:p.Asp371Asn	deleterious(0.02)	possibly_damaging(0.542)	28.3	0	5.24769e-05	0	1	1	0	0	0	0	0
chr3	30713735	C	T	TGFBR2	rs777689025	missense_variant	ENSG00000163513	ENST00000359013.4:c.1135C>T	ENSP00000351905.4:p.Leu379Phe	deleterious(0.04)	probably_damaging(0.985)	27.1	0	5.24769e-05	0	1	1	0	0	0	0	0
chr3	30732990	G	A	TGFBR2	NA	missense_variant	ENSG00000163513	ENST00000359013.4:c.1678G>A	ENSP00000351905.4:p.Ala560Thr	tolerated(0.05)	possibly_damaging(0.83)	26.1	0	5.24769e-05	0	0	0	0	0	1	1	5
chr3	30733003	G	A	TGFBR2	NA	missense_variant	ENSG00000163513	ENST00000359013.4:c.1691G>A	ENSP00000351905.4:p.Ser564Asn	tolerated(0.71)	benign(0.001)	14.07	0	5.24769e-05	0	1	1	0	0	0	0	5
chr3	30733030	C	T	TGFBR2	rs755070814	missense_variant	ENSG00000163513	ENST00000359013.4:c.1718C>T	ENSP00000351905.4:p.Ser573Leu	deleterious(0.02)	benign(0.235)	26.9	0	5.24769e-05	0	1	1	0	0	0	0	0
chr3	46937236	G	A	PTH1R	NA	missense_variant	ENSG00000160801	ENST00000313049.5:c.190G>A	ENSP00000321999.4:p.Glu64Lys	tolerated(0.18)	benign(0.021)	22	0	5.24769e-05	0	1	1	0	0	0	0	1
chr3	46937292	G	C	PTH1R	NA	missense_variant	ENSG00000160801	ENST00000313049.5:c.246G>C	ENSP00000321999.4:p.Lys82Asn	tolerated(0.14)	benign(0.057)	15.65	0	5.24769e-05	0	1	1	0	0	0	0	0
chr3	46937293	G	C	PTH1R	rs200894103	missense_variant	ENSG00000160801	ENST00000313049.5:c.247G>C	ENSP00000321999.4:p.Ala83Pro	tolerated(0.22)	benign(0)	0.945	0	5.24769e-05	0	1	1	0	0	0	0	0
chr3	46940216	G	C	PTH1R	NA	missense_variant	ENSG00000160801	ENST00000313049.5:c.703G>C	ENSP00000321999.4:p.Val235Leu	tolerated(0.18)	benign(0.014)	13.55	0	5.24769e-05	0	1	1	0	0	0	0	0
chr3	46940253	G	A	PTH1R	NA	missense_variant	ENSG00000160801	ENST00000313049.5:c.740G>A	ENSP00000321999.4:p.Gly247Asp	tolerated(0.19)	benign(0.128)	16	0	5.24769e-05	0	1	1	0	0	0	0	0
chr3	46940934	G	A	PTH1R	NA	missense_variant	ENSG00000160801	ENST00000313049.5:c.976G>A	ENSP00000321999.4:p.Val326Ile	tolerated(0.71)	benign(0.006)	5.733	0	5.24769e-05	0	1	1	0	0	0	0	2
chr3	46942535	G	A	PTH1R	NA	missense_variant	ENSG00000160801	ENST00000313049.5:c.1009G>A	ENSP00000321999.4:p.Ala337Thr	tolerated(0.38)	benign(0.006)	14.38	0	5.24769e-05	0	1	1	0	0	0	0	1
chr3	46944863	T	G	PTH1R	NA	missense_variant	ENSG00000160801	ENST00000313049.5:c.1499T>G	ENSP00000321999.4:p.Val500Gly	deleterious(0.03)	benign(0.009)	23.6	0	5.24769e-05	0	0	0	0	0	1	1	0
chr3	46944925	C	T	PTH1R	rs200304786,COSM1423471	missense_variant	ENSG00000160801	ENST00000313049.5:c.1561C>T	ENSP00000321999.4:p.Arg521Cys	deleterious(0)	probably_damaging(0.98)	34	0	5.24769e-05	0	1	1	0	0	0	0	0
chr3	46944959	C	T	PTH1R	rs749853183	missense_variant	ENSG00000160801	ENST00000313049.5:c.1595C>T	ENSP00000321999.4:p.Pro532Leu	tolerated(0.68)	benign(0.001)	14.73	0	5.24769e-05	0	1	1	0	0	0	0	0
chr3	46945009	G	A	PTH1R	rs200667470,COSM3735624	missense_variant	ENSG00000160801	ENST00000313049.5:c.1645G>A	ENSP00000321999.4:p.Glu549Lys	tolerated(0.51)	benign(0.033)	19.97	0	5.24769e-05	0	1	1	0	0	0	0	0
chr3	46945045	G	A	PTH1R	rs756330580	missense_variant	ENSG00000160801	ENST00000313049.5:c.1681G>A	ENSP00000321999.4:p.Asp561Asn	tolerated(0.16)	benign(0.003)	23.6	0	5.24769e-05	0	1	1	0	0	0	0	0
chr4	106155145	C	G	TET2	NA	missense_variant	ENSG00000168769	ENST00000540549.1:c.46C>G	ENSP00000442788.1:p.Pro16Ala	deleterious(0)	benign(0.124)	20.2	0	5.24769e-05	0	1	1	0	0	0	0	16
chr4	106155566	A	G	TET2	NA	missense_variant	ENSG00000168769	ENST00000540549.1:c.467A>G	ENSP00000442788.1:p.Gln156Arg	tolerated(0.06)	benign(0.02)	0.003	0	5.24769e-05	0	0	0	0	0	1	1	0
chr4	106155709	G	A	TET2	NA	missense_variant	ENSG00000168769	ENST00000540549.1:c.610G>A	ENSP00000442788.1:p.Ala204Thr	tolerated(0.15)	benign(0.025)	19.49	0	5.24769e-05	0	1	1	0	0	0	0	1
chr4	106155937	T	A	TET2	NA	missense_variant	ENSG00000168769	ENST00000540549.1:c.838T>A	ENSP00000442788.1:p.Ser280Thr	deleterious(0)	possibly_damaging(0.772)	23.1	0	5.24769e-05	0	1	1	0	0	0	0	15
chr4	106156291	C	T	TET2	NA	missense_variant	ENSG00000168769	ENST00000540549.1:c.1192C>T	ENSP00000442788.1:p.Pro398Ser	tolerated(0.28)	benign(0.008)	7.699	0	5.24769e-05	0	1	1	0	0	0	0	0
chr4	106156370	G	T	TET2	NA	missense_variant	ENSG00000168769	ENST00000540549.1:c.1271G>T	ENSP00000442788.1:p.Ser424Ile	deleterious_low_confidence(0.04)	benign(0.01)	19.83	0	5.24769e-05	0	1	1	0	0	0	0	0
chr4	106156538	C	T	TET2	COSM1716790	missense_variant	ENSG00000168769	ENST00000540549.1:c.1439C>T	ENSP00000442788.1:p.Pro480Leu	tolerated(0.16)	benign(0.006)	0.881	0	5.24769e-05	0	1	1	0	0	0	0	0
chr4	106156547	A	C	TET2	NA	missense_variant	ENSG00000168769	ENST00000540549.1:c.1448A>C	ENSP00000442788.1:p.Asn483Thr	deleterious_low_confidence(0)	benign(0.075)	4.075	0	5.24769e-05	0	1	1	0	0	0	0	0
chr4	106156707	A	C	TET2	NA	missense_variant	ENSG00000168769	ENST00000540549.1:c.1608A>C	ENSP00000442788.1:p.Lys536Asn	tolerated(0.11)	benign(0.002)	0.114	0	5.24769e-05	0	1	1	0	0	0	0	0
chr4	106156804	G	T	TET2	NA	missense_variant	ENSG00000168769	ENST00000540549.1:c.1705G>T	ENSP00000442788.1:p.Ala569Ser	tolerated(0.94)	benign(0.009)	0.001	0	5.24769e-05	0	1	1	0	0	0	0	0
chr4	106156994	A	C	TET2	rs771967161	missense_variant	ENSG00000168769	ENST00000540549.1:c.1895A>C	ENSP00000442788.1:p.Gln632Pro	tolerated(0.32)	benign(0.004)	0.001	0	5.24769e-05	0	0	0	0	0	1	1	0
chr4	106157003	A	G	TET2	NA	missense_variant	ENSG00000168769	ENST00000540549.1:c.1904A>G	ENSP00000442788.1:p.Gln635Arg	tolerated(0.13)	benign(0.075)	0.303	0	5.24769e-05	0	1	1	0	0	0	0	0
chr4	106157075	A	C	TET2	rs148452509	missense_variant	ENSG00000168769	ENST00000540549.1:c.1976A>C	ENSP00000442788.1:p.Gln659Pro	tolerated(0.06)	benign(0.025)	11.63	0	5.24769e-05	0	1	1	0	0	0	0	0
chr4	106157105	C	G	TET2	rs766713576	missense_variant	ENSG00000168769	ENST00000540549.1:c.2006C>G	ENSP00000442788.1:p.Pro669Arg	deleterious(0.01)	benign(0.209)	0.555	0	5.24769e-05	0	0	0	0	0	1	1	0
chr4	106157164	T	G	TET2	rs182380481	missense_variant	ENSG00000168769	ENST00000540549.1:c.2065T>G	ENSP00000442788.1:p.Ser689Ala	tolerated(0.2)	benign(0.005)	0.001	0	5.24769e-05	0	1	1	0	0	0	0	0
chr4	106157267	C	T	TET2	rs759967244	missense_variant	ENSG00000168769	ENST00000540549.1:c.2168C>T	ENSP00000442788.1:p.Pro723Leu	tolerated(0.3)	benign(0.002)	12.25	0	5.24769e-05	0	1	1	0	0	0	0	0
chr4	106157365	A	C	TET2	rs779226820	missense_variant	ENSG00000168769	ENST00000540549.1:c.2266A>C	ENSP00000442788.1:p.Ile756Leu	tolerated(0.65)	benign(0)	0.001	0	5.24769e-05	0	1	1	0	0	0	0	0
chr4	106157730	T	A	TET2	NA	missense_variant	ENSG00000168769	ENST00000540549.1:c.2631T>A	ENSP00000442788.1:p.Asp877Glu	tolerated(0.27)	benign(0.014)	5.565	0	5.24769e-05	0	1	1	0	0	0	0	0
chr4	106157860	A	G	TET2	rs527534443	missense_variant	ENSG00000168769	ENST00000540549.1:c.2761A>G	ENSP00000442788.1:p.Ile921Val	tolerated(1)	benign(0)	0.002	0	5.24769e-05	0	0	0	0	0	1	1	0
chr4	106157872	G	A	TET2	NA	missense_variant	ENSG00000168769	ENST00000540549.1:c.2773G>A	ENSP00000442788.1:p.Ala925Thr	deleterious(0.04)	possibly_damaging(0.488)	22.5	0	5.24769e-05	0	1	1	0	0	0	0	0
chr4	106157879	T	G	TET2	NA	missense_variant	ENSG00000168769	ENST00000540549.1:c.2780T>G	ENSP00000442788.1:p.Val927Gly	deleterious(0)	benign(0.001)	12.29	0	5.24769e-05	0	1	1	0	0	0	0	0
chr4	106157918	C	G	TET2	NA	missense_variant	ENSG00000168769	ENST00000540549.1:c.2819C>G	ENSP00000442788.1:p.Thr940Ser	tolerated(0.35)	benign(0.01)	5.179	0	5.24769e-05	0	1	1	0	0	0	0	0
chr4	106158031	C	T	TET2	rs148297543	missense_variant	ENSG00000168769	ENST00000540549.1:c.2932C>T	ENSP00000442788.1:p.His978Tyr	tolerated(0.42)	benign(0.167)	1.274	0	5.24769e-05	0	1	1	0	0	0	0	0
chr4	106158119	C	T	TET2	NA	missense_variant	ENSG00000168769	ENST00000540549.1:c.3020C>T	ENSP00000442788.1:p.Thr1007Ile	tolerated(1)	benign(0.002)	1.101	0	5.24769e-05	0	0	0	0	0	1	1	0
chr4	106158127	G	A	TET2	NA	missense_variant	ENSG00000168769	ENST00000540549.1:c.3028G>A	ENSP00000442788.1:p.Glu1010Lys	deleterious(0)	possibly_damaging(0.896)	28.6	0	5.24769e-05	0	1	1	0	0	0	0	0
chr4	106190819	G	A	TET2	rs534309433,COSM87153	missense_variant	ENSG00000168769	ENST00000540549.1:c.4097G>A	ENSP00000442788.1:p.Arg1366His	deleterious(0)	probably_damaging(1)	35	0	5.24769e-05	0	0	0	0	0	1	1	0
chr4	106190842	T	C	TET2	NA	missense_variant	ENSG00000168769	ENST00000540549.1:c.4120T>C	ENSP00000442788.1:p.Cys1374Arg	deleterious(0)	probably_damaging(1)	27.3	0	5.24769e-05	0	0	0	0	0	1	1	0
chr4	106190866	C	T	TET2	COSM87162	missense_variant	ENSG00000168769	ENST00000540549.1:c.4144C>T	ENSP00000442788.1:p.His1382Tyr	deleterious(0)	probably_damaging(1)	31	0	5.24769e-05	0	0	0	0	0	1	1	0
chr4	106193805	G	C	TET2	NA	missense_variant	ENSG00000168769	ENST00000540549.1:c.4267G>C	ENSP00000442788.1:p.Val1423Leu	tolerated(0.4)	benign(0.363)	16.07	0	5.24769e-05	0	1	1	0	0	0	0	0
chr4	106193814	G	A	TET2	NA	missense_variant	ENSG00000168769	ENST00000540549.1:c.4276G>A	ENSP00000442788.1:p.Val1426Met	tolerated(0.1)	benign(0.378)	20.1	0	5.24769e-05	0	0	0	0	0	1	1	0
chr4	106193925	A	G	TET2	NA	missense_variant	ENSG00000168769	ENST00000540549.1:c.4387A>G	ENSP00000442788.1:p.Thr1463Ala	tolerated(0.06)	possibly_damaging(0.868)	24	0	5.24769e-05	0	0	0	0	0	1	1	0
chr4	106196312	C	T	TET2	rs746853704	missense_variant	ENSG00000168769	ENST00000540549.1:c.4645C>T	ENSP00000442788.1:p.Pro1549Ser	tolerated(0.24)	benign(0.243)	0.215	0	5.24769e-05	0	1	1	0	0	0	0	0
chr4	106196460	A	G	TET2	NA	missense_variant	ENSG00000168769	ENST00000540549.1:c.4793A>G	ENSP00000442788.1:p.Tyr1598Cys	deleterious(0.01)	benign(0.432)	21.8	0	5.24769e-05	0	1	1	0	0	0	0	0
chr4	106196484	G	C	TET2	rs587778702,COSM1018320	missense_variant	ENSG00000168769	ENST00000540549.1:c.4817G>C	ENSP00000442788.1:p.Gly1606Ala	tolerated(0.12)	benign(0.415)	21	0	5.24769e-05	0	1	1	0	0	0	0	0
chr4	106196613	A	G	TET2	rs780131139	missense_variant	ENSG00000168769	ENST00000540549.1:c.4946A>G	ENSP00000442788.1:p.Tyr1649Cys	tolerated(0.06)	benign(0.144)	11.53	0	5.24769e-05	0	0	0	0	0	1	1	15
chr4	106196990	A	C	TET2	NA	missense_variant	ENSG00000168769	ENST00000540549.1:c.5323A>C	ENSP00000442788.1:p.Ser1775Arg	deleterious(0.01)	probably_damaging(0.917)	23.4	0	5.24769e-05	0	1	1	0	0	0	0	0
chr4	106197177	C	T	TET2	rs756322620	missense_variant	ENSG00000168769	ENST00000540549.1:c.5510C>T	ENSP00000442788.1:p.Ala1837Val	tolerated(0.2)	possibly_damaging(0.473)	14.74	0	5.24769e-05	0	0	0	0	0	1	1	0
chr4	106197214	C	G	TET2	NA	missense_variant	ENSG00000168769	ENST00000540549.1:c.5547C>G	ENSP00000442788.1:p.Asp1849Glu	deleterious(0.01)	probably_damaging(1)	23.9	0	5.24769e-05	0	0	0	0	0	1	1	0
chr4	106197218	G	A	TET2	COSM3945849	missense_variant	ENSG00000168769	ENST00000540549.1:c.5551G>A	ENSP00000442788.1:p.Glu1851Lys	deleterious(0)	probably_damaging(0.998)	32	0	5.24769e-05	0	0	0	0	0	1	1	0
chr4	106197225	G	A	TET2	NA	missense_variant	ENSG00000168769	ENST00000540549.1:c.5558G>A	ENSP00000442788.1:p.Ser1853Asn	tolerated(0.97)	benign(0.03)	6.969	0	5.24769e-05	0	1	1	0	0	0	0	0
chr4	106197285	T	A	TET2	rs116519313,COSM41741	missense_variant	ENSG00000168769	ENST00000540549.1:c.5618T>A	ENSP00000442788.1:p.Ile1873Asn	deleterious(0)	probably_damaging(1)	29.6	0	5.24769e-05	0	1	1	0	0	0	0	0
chr4	106197285	T	C	TET2	rs116519313,COSM41741	missense_variant	ENSG00000168769	ENST00000540549.1:c.5618T>C	ENSP00000442788.1:p.Ile1873Thr	deleterious(0)	probably_damaging(1)	26	0	5.24769e-05	0	1	1	0	0	0	0	0
chr5	1254599	C	T	TERT	NA	missense_variant	ENSG00000164362	ENST00000310581.5:c.3179G>A	ENSP00000309572.5:p.Gly1060Asp	tolerated(0.15)	possibly_damaging(0.62)	19.29	0	5.24769e-05	0	1	1	0	0	0	0	0
chr5	1255425	G	C	TERT	NA	missense_variant	ENSG00000164362	ENST00000310581.5:c.3134C>G	ENSP00000309572.5:p.Ser1045Cys	deleterious(0.04)	benign(0.052)	1.708	0	5.24769e-05	0	0	0	0	0	1	1	0
chr5	1255453	T	C	TERT	NA	missense_variant	ENSG00000164362	ENST00000310581.5:c.3106A>G	ENSP00000309572.5:p.Ile1036Val	tolerated(0.06)	benign(0.125)	5.346	0	5.24769e-05	0	1	1	0	0	0	0	0
chr5	1264624	G	A	TERT	NA	missense_variant	ENSG00000164362	ENST00000310581.5:c.2738C>T	ENSP00000309572.5:p.Ala913Val	tolerated(0.34)	benign(0.06)	0.039	0	5.24769e-05	0	1	1	0	0	0	0	0
chr5	1279464	C	T	TERT	rs202123213	missense_variant	ENSG00000164362	ENST00000310581.5:c.2072G>A	ENSP00000309572.5:p.Arg691His	deleterious(0.03)	benign(0.219)	23.2	0	5.24769e-05	0	1	1	0	0	0	0	0
chr5	1279563	A	G	TERT	NA	missense_variant	ENSG00000164362	ENST00000310581.5:c.1973T>C	ENSP00000309572.5:p.Val658Ala	deleterious(0.02)	benign(0.194)	14.95	0	5.24769e-05	0	1	1	0	0	0	0	0
chr5	1280286	C	T	TERT	rs779338296	missense_variant	ENSG00000164362	ENST00000310581.5:c.1937G>A	ENSP00000309572.5:p.Arg646His	tolerated(0.2)	benign(0.003)	12.61	0	5.24769e-05	0	1	1	0	0	0	0	0
chr5	1280325	A	G	TERT	NA	missense_variant	ENSG00000164362	ENST00000310581.5:c.1898T>C	ENSP00000309572.5:p.Ile633Thr	deleterious(0)	probably_damaging(0.964)	23.8	0	5.24769e-05	0	1	1	0	0	0	0	0
chr5	1280338	C	G	TERT	NA	missense_variant	ENSG00000164362	ENST00000310581.5:c.1885G>C	ENSP00000309572.5:p.Gly629Arg	deleterious(0)	probably_damaging(0.995)	25.4	0	5.24769e-05	0	1	1	0	0	0	0	0
chr5	1280343	G	C	TERT	rs146439826	missense_variant	ENSG00000164362	ENST00000310581.5:c.1880C>G	ENSP00000309572.5:p.Pro627Arg	tolerated(0.25)	benign(0.087)	9.756	0	5.24769e-05	0	1	1	0	0	0	0	0
chr5	1282559	T	C	TERT	NA	missense_variant	ENSG00000164362	ENST00000310581.5:c.1754A>G	ENSP00000309572.5:p.Gln585Arg	deleterious(0.02)	probably_damaging(0.992)	23.6	0	5.24769e-05	0	0	0	0	0	1	1	0
chr5	1282564	C	A	TERT	NA	missense_variant	ENSG00000164362	ENST00000310581.5:c.1749G>T	ENSP00000309572.5:p.Lys583Asn	deleterious(0)	benign(0.369)	23.3	0	5.24769e-05	0	1	1	0	0	0	0	0
chr5	1282666	C	T	TERT	NA	missense_variant	ENSG00000164362	ENST00000310581.5:c.1647G>A	ENSP00000309572.5:p.Met549Ile	deleterious(0.01)	possibly_damaging(0.685)	24.8	0	5.24769e-05	0	0	0	0	0	1	1	0
chr5	1282688	G	A	TERT	NA	missense_variant	ENSG00000164362	ENST00000310581.5:c.1625C>T	ENSP00000309572.5:p.Ala542Val	deleterious(0)	possibly_damaging(0.904)	24.2	0	5.24769e-05	0	0	0	0	0	1	1	0
chr5	1282719	C	A	TERT	rs776459827	missense_variant	ENSG00000164362	ENST00000310581.5:c.1594G>T	ENSP00000309572.5:p.Ala532Ser	tolerated(1)	benign(0.042)	0.118	0	5.24769e-05	0	1	1	0	0	0	0	0
chr5	1293511	A	G	TERT	NA	missense_variant	ENSG00000164362	ENST00000310581.5:c.1490T>C	ENSP00000309572.5:p.Leu497Pro	deleterious(0.03)	possibly_damaging(0.722)	22.5	0	5.24769e-05	0	1	1	0	0	0	0	0
chr5	1293614	C	T	TERT	NA	missense_variant	ENSG00000164362	ENST00000310581.5:c.1387G>A	ENSP00000309572.5:p.Gly463Ser	tolerated(0.82)	benign(0.064)	0.011	0	5.24769e-05	0	1	1	0	0	0	0	0
chr5	1293670	T	C	TERT	NA	missense_variant	ENSG00000164362	ENST00000310581.5:c.1331A>G	ENSP00000309572.5:p.Asp444Gly	tolerated(0.74)	benign(0.001)	0.002	0	5.24769e-05	0	1	1	0	0	0	0	0
chr5	1294003	T	C	TERT	NA	missense_variant	ENSG00000164362	ENST00000310581.5:c.998A>G	ENSP00000309572.5:p.Tyr333Cys	deleterious(0)	probably_damaging(0.996)	23.4	0	5.24769e-05	0	1	1	0	0	0	0	0
chr5	1294009	A	G	TERT	NA	missense_variant	ENSG00000164362	ENST00000310581.5:c.992T>C	ENSP00000309572.5:p.Phe331Ser	deleterious(0)	possibly_damaging(0.77)	24.6	0	5.24769e-05	0	0	0	0	0	1	1	0
chr5	1294028	A	C	TERT	NA	missense_variant	ENSG00000164362	ENST00000310581.5:c.973T>G	ENSP00000309572.5:p.Tyr325Asp	deleterious(0.03)	benign(0.434)	11.89	0	5.24769e-05	0	1	1	0	0	0	0	0
chr5	1294031	C	T	TERT	NA	missense_variant	ENSG00000164362	ENST00000310581.5:c.970G>A	ENSP00000309572.5:p.Val324Met	tolerated(0.08)	benign(0.071)	0.138	0	5.24769e-05	0	0	0	0	0	1	1	0
chr5	1294050	C	G	TERT	NA	missense_variant	ENSG00000164362	ENST00000310581.5:c.951G>C	ENSP00000309572.5:p.Trp317Cys	deleterious(0.05)	benign(0.105)	15.83	0	5.24769e-05	0	0	0	0	0	1	1	0
chr5	1294051	C	A	TERT	NA	missense_variant	ENSG00000164362	ENST00000310581.5:c.950G>T	ENSP00000309572.5:p.Trp317Leu	tolerated(0.28)	benign(0)	8.278	0	5.24769e-05	0	0	0	0	0	1	1	0
chr5	1294174	G	T	TERT	NA	missense_variant	ENSG00000164362	ENST00000310581.5:c.827C>A	ENSP00000309572.5:p.Ala276Asp	tolerated(0.58)	benign(0.102)	0.043	0	5.24769e-05	0	1	1	0	0	0	0	0
chr5	1294289	G	A	TERT	rs149427814	missense_variant	ENSG00000164362	ENST00000310581.5:c.712C>T	ENSP00000309572.5:p.Pro238Ser	tolerated(0.11)	benign(0.037)	0.009	0	5.24769e-05	0	0	0	0	0	1	1	0
chr5	44809162	G	A	MRPS30	COSM1486797,COSM449710	missense_variant	ENSG00000112996	ENST00000507110.1:c.98G>A	ENSP00000424328.1:p.Cys33Tyr	tolerated(1)	benign(0.06)	0.064	0	5.24769e-05	0	0	0	0	0	1	1	0
chr5	44809192	G	C	MRPS30	rs760640875	missense_variant	ENSG00000112996	ENST00000507110.1:c.128G>C	ENSP00000424328.1:p.Arg43Pro	tolerated(0.06)	probably_damaging(0.987)	25.4	0	5.24769e-05	0	1	1	0	0	0	0	0
chr5	44815041	C	G	MRPS30	rs769313674	missense_variant	ENSG00000112996	ENST00000507110.1:c.1057C>G	ENSP00000424328.1:p.Arg353Gly	deleterious(0)	probably_damaging(0.999)	33	0	5.24769e-05	0	0	0	0	0	1	1	1
chr5	44815051	T	C	MRPS30	NA	missense_variant	ENSG00000112996	ENST00000507110.1:c.1067T>C	ENSP00000424328.1:p.Val356Ala	deleterious(0.04)	possibly_damaging(0.794)	24.1	0	5.24769e-05	0	1	1	0	0	0	0	1
chr5	44815068	A	G	MRPS30	COSM1068480,COSM1154466	missense_variant	ENSG00000112996	ENST00000507110.1:c.1084A>G	ENSP00000424328.1:p.Thr362Ala	deleterious(0)	probably_damaging(0.923)	26.2	0	5.24769e-05	0	1	1	0	0	0	0	0
chr5	44815183	C	A	MRPS30	rs567465054	missense_variant	ENSG00000112996	ENST00000507110.1:c.1199C>A	ENSP00000424328.1:p.Pro400His	deleterious(0.01)	probably_damaging(0.995)	29.1	0	5.24769e-05	0	1	1	0	0	0	0	0
chr5	44815200	G	A	MRPS30	NA	missense_variant	ENSG00000112996	ENST00000507110.1:c.1216G>A	ENSP00000424328.1:p.Glu406Lys	tolerated(0.07)	probably_damaging(0.999)	27.3	0	5.24769e-05	0	0	0	0	0	1	1	0
chr5	56155583	G	T	MAP3K1	rs373481385	missense_variant	ENSG00000095015	ENST00000399503.3:c.675G>T	ENSP00000382423.3:p.Met225Ile	tolerated_low_confidence(0.69)	benign(0)	13.07	0	5.24769e-05	0	1	1	0	0	0	0	1
chr5	56155629	G	A	MAP3K1	NA	missense_variant	ENSG00000095015	ENST00000399503.3:c.721G>A	ENSP00000382423.3:p.Ala241Thr	tolerated_low_confidence(0.47)	benign(0.002)	1.506	0	5.24769e-05	0	1	1	0	0	0	0	1
chr5	56155653	C	T	MAP3K1	rs200234617	missense_variant	ENSG00000095015	ENST00000399503.3:c.745C>T	ENSP00000382423.3:p.Arg249Cys	deleterious_low_confidence(0)	possibly_damaging(0.87)	35	0	5.24769e-05	0	0	0	0	0	1	1	1
chr5	56155719	A	G	MAP3K1	NA	missense_variant	ENSG00000095015	ENST00000399503.3:c.811A>G	ENSP00000382423.3:p.Arg271Gly	deleterious_low_confidence(0)	possibly_damaging(0.867)	25.4	0	5.24769e-05	0	1	1	0	0	0	0	0
chr5	56170877	G	A	MAP3K1	COSM192358	missense_variant	ENSG00000095015	ENST00000399503.3:c.1705G>A	ENSP00000382423.3:p.Val569Ile	deleterious(0.04)	probably_damaging(0.969)	32	0	5.24769e-05	0	1	1	0	0	0	0	0
chr5	56171049	G	T	MAP3K1	NA	missense_variant	ENSG00000095015	ENST00000399503.3:c.1877G>T	ENSP00000382423.3:p.Ser626Ile	tolerated(0.06)	benign(0.004)	20.7	0	5.24769e-05	0	1	1	0	0	0	0	0
chr5	56177852	C	T	MAP3K1	rs200778337	missense_variant	ENSG00000095015	ENST00000399503.3:c.2825C>T	ENSP00000382423.3:p.Thr942Ile	tolerated_low_confidence(0.14)	unknown(0)	19.94	0	5.24769e-05	0	1	1	0	0	0	0	0
chr5	56177948	A	G	MAP3K1	NA	missense_variant	ENSG00000095015	ENST00000399503.3:c.2921A>G	ENSP00000382423.3:p.His974Arg	tolerated_low_confidence(0.15)	benign(0.016)	10.38	0	5.24769e-05	0	1	1	0	0	0	0	0
chr5	56177978	C	T	MAP3K1	COSM449852,COSM449851	missense_variant	ENSG00000095015	ENST00000399503.3:c.2951C>T	ENSP00000382423.3:p.Ser984Leu	tolerated_low_confidence(0.29)	benign(0.001)	10.38	0	5.24769e-05	0	1	1	0	0	0	0	0
chr5	56178035	A	G	MAP3K1	NA	missense_variant	ENSG00000095015	ENST00000399503.3:c.3008A>G	ENSP00000382423.3:p.Lys1003Arg	deleterious_low_confidence(0)	possibly_damaging(0.776)	21.3	0	5.24769e-05	0	0	0	0	0	1	1	0
chr5	56178155	C	T	MAP3K1	rs766945040	missense_variant	ENSG00000095015	ENST00000399503.3:c.3128C>T	ENSP00000382423.3:p.Ser1043Phe	deleterious_low_confidence(0)	probably_damaging(0.987)	27.8	0	5.24769e-05	0	0	0	0	0	1	1	0
chr5	56178163	T	C	MAP3K1	NA	missense_variant	ENSG00000095015	ENST00000399503.3:c.3136T>C	ENSP00000382423.3:p.Phe1046Leu	deleterious_low_confidence(0)	possibly_damaging(0.871)	25.6	0	5.24769e-05	0	1	1	0	0	0	0	0
chr5	56178178	C	A	MAP3K1	NA	missense_variant	ENSG00000095015	ENST00000399503.3:c.3151C>A	ENSP00000382423.3:p.Pro1051Thr	deleterious_low_confidence(0)	benign(0.113)	23.2	0	5.24769e-05	0	1	1	0	0	0	0	0
chr5	56178262	A	G	MAP3K1	NA	missense_variant	ENSG00000095015	ENST00000399503.3:c.3235A>G	ENSP00000382423.3:p.Asn1079Asp	tolerated_low_confidence(0.15)	benign(0.001)	9.286	0	5.24769e-05	0	1	1	0	0	0	0	0
chr5	56178445	A	T	MAP3K1	rs373890078	missense_variant	ENSG00000095015	ENST00000399503.3:c.3418A>T	ENSP00000382423.3:p.Met1140Leu	tolerated(0.31)	benign(0.001)	0.246	0	5.24769e-05	0	1	1	0	0	0	0	0
chr5	56184075	G	C	MAP3K1	NA	missense_variant	ENSG00000095015	ENST00000399503.3:c.4280G>C	ENSP00000382423.3:p.Gly1427Ala	deleterious(0)	probably_damaging(0.998)	26	0	5.24769e-05	0	0	0	0	0	1	1	2
chr5	56184089	G	A	MAP3K1	NA	missense_variant	ENSG00000095015	ENST00000399503.3:c.4294G>A	ENSP00000382423.3:p.Val1432Ile	tolerated(0.5)	possibly_damaging(0.679)	24.3	0	5.24769e-05	0	0	0	0	0	1	1	0
chr5	56184113	A	G	MAP3K1	rs202155960	missense_variant	ENSG00000095015	ENST00000399503.3:c.4318A>G	ENSP00000382423.3:p.Ile1440Val	tolerated(0.12)	possibly_damaging(0.78)	24.3	0	5.24769e-05	0	0	0	0	0	1	1	0
chr5	56184123	C	T	MAP3K1	rs565098238	missense_variant	ENSG00000095015	ENST00000399503.3:c.4328C>T	ENSP00000382423.3:p.Ala1443Val	tolerated(0.06)	benign(0.111)	26	0	5.24769e-05	0	1	1	0	0	0	0	0
chr5	58270604	A	C	PDE4D	NA	missense_variant	ENSG00000113448	ENST00000340635.6:c.2317T>G	ENSP00000345502.6:p.Ser773Ala	tolerated_low_confidence(0.08)	benign(0.045)	12.26	0	5.24769e-05	0	1	1	0	0	0	0	0
chr5	58270823	T	C	PDE4D	NA	missense_variant	ENSG00000113448	ENST00000340635.6:c.2098A>G	ENSP00000345502.6:p.Thr700Ala	deleterious_low_confidence(0.01)	probably_damaging(0.997)	23.2	0	5.24769e-05	0	1	1	0	0	0	0	0
chr5	58271543	G	A	PDE4D	NA	missense_variant	ENSG00000113448	ENST00000340635.6:c.1954C>T	ENSP00000345502.6:p.Arg652Cys	deleterious_low_confidence(0)	probably_damaging(0.931)	34	0	5.24769e-05	0	1	1	0	0	0	0	1
chr5	58273075	A	C	PDE4D	NA	missense_variant	ENSG00000113448	ENST00000340635.6:c.1650T>G	ENSP00000345502.6:p.Ile550Met	deleterious_low_confidence(0.02)	probably_damaging(0.994)	25	0	5.24769e-05	0	1	1	0	0	0	0	0
chr5	58286667	G	C	PDE4D	NA	missense_variant	ENSG00000113448	ENST00000340635.6:c.1251C>G	ENSP00000345502.6:p.Asn417Lys	deleterious_low_confidence(0.01)	benign(0.105)	21.2	0	5.24769e-05	0	1	1	0	0	0	0	3
chr5	58511777	C	A	PDE4D	NA	missense_variant	ENSG00000113448	ENST00000340635.6:c.473G>T	ENSP00000345502.6:p.Gly158Val	deleterious_low_confidence(0)	probably_damaging(0.973)	31	0	5.24769e-05	0	0	0	0	0	1	1	1
chr5	59284433	C	T	PDE4D	rs543718776,COSM482934	missense_variant	ENSG00000113448	ENST00000502484.2:c.154G>A	ENSP00000423094.2:p.Ala52Thr	tolerated_low_confidence(0.44)	benign(0.386)	24.4	0	5.24769e-05	0	0	0	0	0	1	1	2
chr6	151789934	C	T	C6orf211	NA	missense_variant	ENSG00000146476	ENST00000367294.3:c.1015C>T	ENSP00000356263.3:p.Pro339Ser	deleterious(0.01)	probably_damaging(0.98)	26.6	0	5.24769e-05	0	1	1	0	0	0	0	0
chr6	151789952	A	G	C6orf211	rs147127681	missense_variant	ENSG00000146476	ENST00000367294.3:c.1033A>G	ENSP00000356263.3:p.Met345Val	deleterious(0)	probably_damaging(0.985)	25.8	0	5.24769e-05	0	1	1	0	0	0	0	0
chr6	151859276	T	C	CCDC170	NA	missense_variant	ENSG00000120262	ENST00000239374.7:c.283T>C	ENSP00000239374.6:p.Ser95Pro	deleterious(0.03)	possibly_damaging(0.877)	23.5	0	5.24769e-05	0	1	1	0	0	0	0	16
chr6	151894348	A	T	CCDC170	NA	missense_variant	ENSG00000120262	ENST00000239374.7:c.814A>T	ENSP00000239374.6:p.Arg272Trp	tolerated(0.06)	benign(0.102)	22.3	0	5.24769e-05	0	1	1	0	0	0	0	0
chr6	151894438	T	G	CCDC170	rs775942422	missense_variant	ENSG00000120262	ENST00000239374.7:c.904T>G	ENSP00000239374.6:p.Ser302Ala	tolerated(0.09)	benign(0.02)	0.018	0	5.24769e-05	0	1	1	0	0	0	0	0
chr6	151894451	A	T	CCDC170	rs765903065	missense_variant	ENSG00000120262	ENST00000239374.7:c.917A>T	ENSP00000239374.6:p.Glu306Val	tolerated(0.06)	possibly_damaging(0.791)	25.9	0	5.24769e-05	0	1	1	0	0	0	0	0
chr6	151894574	C	A	CCDC170	NA	missense_variant	ENSG00000120262	ENST00000239374.7:c.1040C>A	ENSP00000239374.6:p.Thr347Asn	deleterious(0.01)	benign(0.142)	16.65	0	5.24769e-05	0	0	0	0	0	1	1	0
chr6	151917521	C	T	CCDC170	COSM1074611	missense_variant	ENSG00000120262	ENST00000239374.7:c.1519C>T	ENSP00000239374.6:p.Leu507Phe	deleterious(0.02)	probably_damaging(0.999)	29	0	5.24769e-05	0	1	1	0	0	0	0	0
chr6	151917524	C	T	CCDC170	rs183044234	missense_variant	ENSG00000120262	ENST00000239374.7:c.1522C>T	ENSP00000239374.6:p.Arg508Trp	deleterious(0.01)	benign(0.336)	27.4	0	5.24769e-05	0	1	1	0	0	0	0	0
chr6	151917578	G	A	CCDC170	NA	missense_variant	ENSG00000120262	ENST00000239374.7:c.1576G>A	ENSP00000239374.6:p.Val526Ile	deleterious(0.02)	benign(0.06)	9.769	0	5.24769e-05	0	1	1	0	0	0	0	0
chr6	151917579	T	C	CCDC170	NA	missense_variant	ENSG00000120262	ENST00000239374.7:c.1577T>C	ENSP00000239374.6:p.Val526Ala	tolerated(0.07)	benign(0.02)	5.641	0	5.24769e-05	0	0	0	0	0	1	1	0
chr6	151917593	G	A	CCDC170	rs770534076,COSM3859163	missense_variant	ENSG00000120262	ENST00000239374.7:c.1591G>A	ENSP00000239374.6:p.Ala531Thr	deleterious(0.02)	benign(0.043)	19.01	0	5.24769e-05	0	0	0	0	0	1	1	0
chr6	151917597	A	T	CCDC170	rs200108871	missense_variant	ENSG00000120262	ENST00000239374.7:c.1595A>T	ENSP00000239374.6:p.His532Leu	deleterious(0.04)	benign(0.016)	2.862	0	5.24769e-05	0	1	1	0	0	0	0	0
chr6	151917647	C	G	CCDC170	rs377387471	missense_variant	ENSG00000120262	ENST00000239374.7:c.1645C>G	ENSP00000239374.6:p.Leu549Val	deleterious(0)	possibly_damaging(0.811)	24	0	5.24769e-05	0	1	1	0	0	0	0	0
chr6	151917652	C	A	CCDC170	NA	missense_variant	ENSG00000120262	ENST00000239374.7:c.1650C>A	ENSP00000239374.6:p.Asn550Lys	tolerated(0.22)	benign(0.003)	0.028	0	5.24769e-05	0	0	0	0	0	1	1	0
chr6	151936648	A	T	CCDC170	NA	missense_variant	ENSG00000120262	ENST00000239374.7:c.1781A>T	ENSP00000239374.6:p.Lys594Met	deleterious(0)	probably_damaging(0.99)	28.1	0	5.24769e-05	0	1	1	0	0	0	0	0
chr6	151936777	A	C	CCDC170	NA	missense_variant	ENSG00000120262	ENST00000239374.7:c.1910A>C	ENSP00000239374.6:p.Lys637Thr	tolerated(0.07)	benign(0.351)	4.004	0	5.24769e-05	0	0	0	0	0	1	1	0
chr6	152332880	A	G	ESR1	rs778932185	missense_variant	ENSG00000091831	ENST00000440973.1:c.1186A>G	ENSP00000405330.1:p.Met396Val	tolerated(0.82)	benign(0.005)	7.807	0	5.24769e-05	0	1	1	0	0	0	0	0
chr6	152415580	G	A	ESR1	rs570661763	missense_variant	ENSG00000091831	ENST00000440973.1:c.1430G>A	ENSP00000405330.1:p.Arg477Gln	tolerated(0.22)	benign(0.032)	23.2	0	5.24769e-05	0	0	0	0	0	1	1	0
chr6	152419896	T	C	ESR1	NA	missense_variant	ENSG00000091831	ENST00000440973.1:c.1583T>C	ENSP00000405330.1:p.Met528Thr	deleterious(0)	probably_damaging(0.999)	26.3	0	5.24769e-05	0	1	1	0	0	0	0	0
chr6	152419910	G	C	ESR1	rs778116774,COSM239746	missense_variant	ENSG00000091831	ENST00000440973.1:c.1597G>C	ENSP00000405330.1:p.Val533Leu	deleterious(0.04)	benign(0.178)	22.9	0	5.24769e-05	0	1	1	0	0	0	0	0
chr6	152419977	G	A	ESR1	rs778554662,COSM1074642	missense_variant	ENSG00000091831	ENST00000440973.1:c.1664G>A	ENSP00000405330.1:p.Arg555His	tolerated(0.11)	benign(0.003)	8.356	0	5.24769e-05	0	1	1	0	0	0	0	0
chr6	152420004	A	G	ESR1	NA	missense_variant	ENSG00000091831	ENST00000440973.1:c.1691A>G	ENSP00000405330.1:p.Asp564Gly	tolerated(0.06)	benign(0)	0.094	0	5.24769e-05	0	1	1	0	0	0	0	0
chr6	152420006	C	A	ESR1	NA	missense_variant	ENSG00000091831	ENST00000440973.1:c.1693C>A	ENSP00000405330.1:p.Gln565Lys	tolerated(0.33)	benign(0.039)	9.916	0	5.24769e-05	0	1	1	0	0	0	0	0
chr6	152420030	T	C	ESR1	NA	missense_variant	ENSG00000091831	ENST00000440973.1:c.1717T>C	ENSP00000405330.1:p.Ser573Pro	tolerated(0.36)	benign(0.007)	0.093	0	5.24769e-05	0	1	1	0	0	0	0	0
chr6	152420056	G	C	ESR1	rs777514097	missense_variant	ENSG00000091831	ENST00000440973.1:c.1743G>C	ENSP00000405330.1:p.Lys581Asn	tolerated_low_confidence(0.08)	benign(0.063)	1.291	0	5.24769e-05	0	0	0	0	0	1	1	0
chr6	152420093	A	G	ESR1	NA	missense_variant	ENSG00000091831	ENST00000440973.1:c.1780A>G	ENSP00000405330.1:p.Thr594Ala	tolerated_low_confidence(0.14)	benign(0.075)	0.162	0	5.24769e-05	0	1	1	0	0	0	0	0
chr8	128750515	C	G	MYC	NA	missense_variant	ENSG00000136997	ENST00000377970.2:c.52C>G	ENSP00000367207.2:p.Leu18Val	tolerated(0.3)	benign(0.055)	15.57	0	5.24769e-05	0	0	0	0	0	1	1	1
chr8	128751166	T	C	MYC	NA	missense_variant	ENSG00000136997	ENST00000377970.2:c.703T>C	ENSP00000367207.2:p.Ser235Pro	tolerated(0.22)	probably_damaging(0.991)	22.8	0	5.24769e-05	0	0	0	0	0	1	1	0
chr8	128751178	C	T	MYC	rs765003654	missense_variant	ENSG00000136997	ENST00000377970.2:c.715C>T	ENSP00000367207.2:p.Leu239Phe	tolerated(0.71)	probably_damaging(0.997)	23.1	0	5.24769e-05	0	1	1	0	0	0	0	0
chr8	128751188	C	T	MYC	NA	missense_variant	ENSG00000136997	ENST00000377970.2:c.725C>T	ENSP00000367207.2:p.Thr242Met	tolerated(0.11)	benign(0.381)	19	0	5.24769e-05	0	1	1	0	0	0	0	0
chr8	128751191	A	T	MYC	NA	missense_variant	ENSG00000136997	ENST00000377970.2:c.728A>T	ENSP00000367207.2:p.Glu243Val	tolerated(0.27)	benign(0.156)	18.57	0	5.24769e-05	0	0	0	0	0	1	1	0
chr8	128751205	G	T	MYC	NA	missense_variant	ENSG00000136997	ENST00000377970.2:c.742G>T	ENSP00000367207.2:p.Gly248Cys	tolerated(0.05)	possibly_damaging(0.698)	24.1	0	5.24769e-05	0	1	1	0	0	0	0	0
chr8	128751212	C	T	MYC	NA	missense_variant	ENSG00000136997	ENST00000377970.2:c.749C>T	ENSP00000367207.2:p.Pro250Leu	tolerated(0.17)	probably_damaging(0.998)	24.3	0	5.24769e-05	0	1	1	0	0	0	0	0
chr8	128751263	C	T	MYC	NA	missense_variant	ENSG00000136997	ENST00000377970.2:c.800C>T	ENSP00000367207.2:p.Ser267Phe	tolerated(0.06)	benign(0.014)	24	0	5.24769e-05	0	1	1	0	0	0	0	0
chr8	128752744	A	G	MYC	NA	missense_variant	ENSG00000136997	ENST00000377970.2:c.905A>G	ENSP00000367207.2:p.His302Arg	tolerated(0.36)	possibly_damaging(0.854)	21.2	0	5.24769e-05	0	1	1	0	0	0	0	0
chr8	128752812	G	A	MYC	NA	missense_variant	ENSG00000136997	ENST00000377970.2:c.973G>A	ENSP00000367207.2:p.Ala325Thr	deleterious(0)	probably_damaging(0.998)	32	0	5.24769e-05	0	1	1	0	0	0	0	0
chr8	128752812	G	T	MYC	NA	missense_variant	ENSG00000136997	ENST00000377970.2:c.973G>T	ENSP00000367207.2:p.Ala325Ser	deleterious(0.03)	probably_damaging(0.999)	28.1	0	5.24769e-05	0	1	1	0	0	0	0	0
chr8	128752818	C	T	MYC	rs781494801	missense_variant	ENSG00000136997	ENST00000377970.2:c.979C>T	ENSP00000367207.2:p.Pro327Ser	tolerated(0.12)	benign(0.077)	13.62	0	5.24769e-05	0	1	1	0	0	0	0	0
chr8	128753031	G	C	MYC	NA	missense_variant	ENSG00000136997	ENST00000377970.2:c.1192G>C	ENSP00000367207.2:p.Glu398Gln	deleterious(0.04)	probably_damaging(0.997)	26.8	0	5.24769e-05	0	1	1	0	0	0	0	0
chr8	128753086	C	T	MYC	NA	missense_variant	ENSG00000136997	ENST00000377970.2:c.1247C>T	ENSP00000367207.2:p.Ala416Val	deleterious(0.01)	benign(0.005)	13.62	0	5.24769e-05	0	1	1	0	0	0	0	0
chr8	76463684	C	G	HNF4G	NA	missense_variant	ENSG00000164749	ENST00000396423.2:c.414C>G	ENSP00000379701.2:p.Ile138Met	tolerated(0.21)	benign(0.004)	15.84	0	5.24769e-05	0	1	1	0	0	0	0	0
chr8	76465313	A	T	HNF4G	NA	missense_variant	ENSG00000164749	ENST00000396423.2:c.496A>T	ENSP00000379701.2:p.Asn166Tyr	deleterious(0.01)	benign(0.042)	23.1	0	5.24769e-05	0	0	0	0	0	1	1	1
chr8	76470782	T	C	HNF4G	COSM3901549,COSM3901548	missense_variant	ENSG00000164749	ENST00000396423.2:c.733T>C	ENSP00000379701.2:p.Cys245Arg	deleterious(0.03)	benign(0.007)	16.62	0	5.24769e-05	0	1	1	0	0	0	0	0
chr8	76470812	C	T	HNF4G	NA	missense_variant	ENSG00000164749	ENST00000396423.2:c.763C>T	ENSP00000379701.2:p.Arg255Cys	deleterious(0)	probably_damaging(0.999)	33	0	5.24769e-05	0	1	1	0	0	0	0	0
chr8	76471138	G	T	HNF4G	NA	missense_variant	ENSG00000164749	ENST00000396423.2:c.959G>T	ENSP00000379701.2:p.Gly320Val	deleterious(0)	probably_damaging(0.999)	24.4	0	5.24769e-05	0	0	0	0	0	1	1	0
chr8	76472629	T	C	HNF4G	rs375963985	missense_variant	ENSG00000164749	ENST00000396423.2:c.1144T>C	ENSP00000379701.2:p.Ser382Pro	tolerated(0.27)	benign(0.001)	19.75	0	5.24769e-05	0	1	1	0	0	0	0	0
chr8	76472634	A	T	HNF4G	rs139324425	missense_variant	ENSG00000164749	ENST00000396423.2:c.1149A>T	ENSP00000379701.2:p.Gln383His	tolerated(0.06)	benign(0.019)	8.861	0	5.24769e-05	0	1	1	0	0	0	0	0
chr9	21970906	G	A	CDKN2A	COSM33805	missense_variant	ENSG00000147889	ENST00000498124.1:c.452C>T	ENSP00000418915.1:p.Pro151Leu	deleterious_low_confidence(0.05)	benign(0.02)	8.101	0	5.24769e-05	0	0	0	0	0	1	1	1
chr9	21970934	G	C	CDKN2A	COSM13616	missense_variant	ENSG00000147889	ENST00000498124.1:c.424C>G	ENSP00000418915.1:p.His142Asp	tolerated(0.11)	benign(0.108)	6.096	0	5.24769e-05	0	0	0	0	1	0	1	1
chr9	21970946	T	C	CDKN2A	rs145012438	missense_variant	ENSG00000147889	ENST00000498124.1:c.412A>G	ENSP00000418915.1:p.Arg138Gly	tolerated_low_confidence(0.15)	benign(0)	3.179	0	5.24769e-05	0	1	1	0	0	0	0	0
chr9	21970975	C	T	CDKN2A	COSM33798,COSM1461803,COSM1461802	missense_variant	ENSG00000147889	ENST00000498124.1:c.383G>A	ENSP00000418915.1:p.Arg128Gln	tolerated(0.36)	benign(0.005)	13.52	0	5.24769e-05	0	0	0	0	0	1	1	0
chr9	21970989	A	T	CDKN2A	rs6413463,COSM13463	missense_variant	ENSG00000147889	ENST00000498124.1:c.369T>A	ENSP00000418915.1:p.His123Gln	deleterious(0.03)	possibly_damaging(0.856)	23	0	5.24769e-05	0	1	1	0	0	0	0	0
chr9	21974681	A	C	CDKN2A	rs199907548,CM004238,COSM3395762,COSM13545,COSM303861,COSM303862,COSM3395761,COSM3685582,COSM3395760,COSM3685581	missense_variant	ENSG00000147889	ENST00000498124.1:c.146T>G	ENSP00000418915.1:p.Ile49Ser	deleterious(0)	probably_damaging(0.989)	28.2	0	5.24769e-05	0	1	1	0	0	0	0	1
chr9	21974693	C	T	CDKN2A	COSM12543,COSM33786	missense_variant	ENSG00000147889	ENST00000498124.1:c.134G>A	ENSP00000418915.1:p.Gly45Asp	deleterious(0.04)	possibly_damaging(0.896)	28.9	0	5.24769e-05	0	1	1	0	0	0	0	1
chr9	22008834	G	A	CDKN2B	NA	missense_variant	ENSG00000147883	ENST00000276925.6:c.119C>T	ENSP00000276925.6:p.Pro40Leu	deleterious(0.01)	possibly_damaging(0.835)	26.7	0	5.24769e-05	0	0	0	0	0	1	1	0
chr9	22008838	C	G	CDKN2B	rs537747623	missense_variant	ENSG00000147883	ENST00000276925.6:c.115G>C	ENSP00000276925.6:p.Asp39His	tolerated(0.4)	probably_damaging(0.912)	25.5	0	5.24769e-05	0	1	1	0	0	0	0	0
chr1	114449656	G	C	DCLRE1B	rs377086086	missense_variant	ENSG00000118655	ENST00000369563.3:c.228G>C	ENSP00000358576.3:p.Glu76Asp	tolerated(0.09)	probably_damaging(0.988)	26.4	3e-05	5.24769e-05	0	0	0	0	0	1	1	0
chr1	114454073	G	A	DCLRE1B	rs377357996	missense_variant	ENSG00000118655	ENST00000369563.3:c.859G>A	ENSP00000358576.3:p.Ala287Thr	tolerated(0.21)	benign(0.036)	14.09	3e-05	5.24769e-05	0	0	0	0	0	1	1	0
chr1	114454164	C	G	DCLRE1B	rs754841219	missense_variant	ENSG00000118655	ENST00000369563.3:c.950C>G	ENSP00000358576.3:p.Pro317Arg	tolerated(0.08)	possibly_damaging(0.472)	23	3e-05	5.24769e-05	0	0	0	0	0	1	1	0
chr1	114454610	G	A	DCLRE1B	rs750408225	missense_variant	ENSG00000118655	ENST00000369563.3:c.1396G>A	ENSP00000358576.3:p.Gly466Ser	tolerated_low_confidence(0.29)	benign(0.02)	9.024	3e-05	5.24769e-05	0	1	1	0	0	0	0	0
chr1	145688141	G	A	RNF115	rs782185428	missense_variant	ENSG00000121848	ENST00000369291.5:c.836G>A	ENSP00000358297.4:p.Arg279Gln	tolerated(0.53)	benign(0.003)	15.86	3e-05	5.24769e-05	0	1	1	0	0	0	0	0
chr1	145688155	A	G	RNF115	rs373826562	missense_variant	ENSG00000121848	ENST00000369291.5:c.850A>G	ENSP00000358297.4:p.Thr284Ala	tolerated_low_confidence(0.28)	benign(0.003)	6.744	3e-05	5.24769e-05	0	0	0	0	0	1	1	0
chr1	242016740	G	A	EXO1	rs755709932	missense_variant	ENSG00000174371	ENST00000366548.3:c.362G>A	ENSP00000355506.3:p.Arg121Gln	deleterious(0.03)	benign(0.236)	23.5	3e-05	5.24769e-05	0	1	1	0	0	0	0	0
chr1	242042190	G	A	EXO1	rs374566461	missense_variant	ENSG00000174371	ENST00000366548.3:c.1654G>A	ENSP00000355506.3:p.Asp552Asn	tolerated(0.22)	possibly_damaging(0.556)	17.4	3e-05	5.24769e-05	0	1	1	0	0	0	0	15
chr1	242042520	G	A	EXO1	rs751959288	missense_variant	ENSG00000174371	ENST00000366548.3:c.1984G>A	ENSP00000355506.3:p.Asp662Asn	tolerated(0.25)	benign(0.024)	20.7	3e-05	5.24769e-05	0	0	0	0	0	1	1	0
chr10	123243216	T	C	FGFR2	rs765724372	missense_variant	ENSG00000066468	ENST00000457416.2:c.2300A>G	ENSP00000410294.2:p.Asn767Ser	tolerated(0.39)	benign(0.108)	16.19	3e-05	5.24769e-05	0	0	0	0	0	1	1	0
chr10	123353264	G	T	FGFR2	rs774554190	missense_variant	ENSG00000066468	ENST00000457416.2:c.68C>A	ENSP00000410294.2:p.Pro23His	deleterious_low_confidence(0.03)	probably_damaging(1)	27.3	3e-05	5.24769e-05	0	0	0	0	0	1	1	0
chr10	123353304	G	C	FGFR2	rs370122049	missense_variant	ENSG00000066468	ENST00000457416.2:c.28C>G	ENSP00000410294.2:p.Leu10Val	tolerated_low_confidence(0.28)	probably_damaging(0.997)	23.5	3e-05	5.24769e-05	0	1	1	0	0	0	0	0
chr10	64906020	G	A	NRBF2	rs745822881,COSM1348567	missense_variant	ENSG00000148572	ENST00000277746.6:c.82G>A	ENSP00000277746.6:p.Glu28Lys	deleterious(0.01)	possibly_damaging(0.707)	34	3e-05	5.24769e-05	0	1	1	0	0	0	0	2
chr12	115112527	G	A	TBX3	rs370551433	missense_variant	ENSG00000135111	ENST00000257566.3:c.1213C>T	ENSP00000257566.3:p.Arg405Cys	deleterious(0.04)	probably_damaging(0.954)	24.2	3e-05	5.24769e-05	0	1	1	0	0	0	0	0
chr12	115114175	A	G	TBX3	rs369381057	missense_variant	ENSG00000135111	ENST00000257566.3:c.1042T>C	ENSP00000257566.3:p.Cys348Arg	tolerated(0.38)	probably_damaging(0.948)	24.5	3e-05	5.24769e-05	0	1	1	0	0	0	0	0
chr12	28116299	G	A	PTHLH	rs778459165,COSM1361121	missense_variant	ENSG00000087494	ENST00000395872.1:c.506C>T	ENSP00000379213.1:p.Ser169Leu	deleterious_low_confidence(0.04)	benign(0.005)	24	3e-05	5.24769e-05	0	1	1	0	0	0	0	0
chr12	28116358	G	C	PTHLH	rs199690911	missense_variant	ENSG00000087494	ENST00000395872.1:c.447C>G	ENSP00000379213.1:p.Asp149Glu	tolerated(0.99)	benign(0.005)	6.926	3e-05	5.24769e-05	0	1	1	0	0	0	0	0
chr12	28116544	G	T	PTHLH	rs139412701	missense_variant	ENSG00000087494	ENST00000395872.1:c.261C>A	ENSP00000379213.1:p.Asn87Lys	tolerated(0.12)	benign(0.446)	22.8	3e-05	5.24769e-05	0	1	1	0	0	0	0	0
chr12	96180835	G	A	NTN4	rs781589779	missense_variant	ENSG00000074527	ENST00000343702.4:c.467C>T	ENSP00000340998.4:p.Pro156Leu	tolerated(0.25)	benign(0.168)	18.51	3e-05	5.24769e-05	0	1	1	0	0	0	0	1
chr12	96180865	C	T	NTN4	rs763058375	missense_variant	ENSG00000074527	ENST00000343702.4:c.437G>A	ENSP00000340998.4:p.Arg146His	deleterious(0)	probably_damaging(1)	34	3e-05	5.24769e-05	0	1	1	0	0	0	0	0
chr14	68758611	C	T	RAD51B	rs373104809	missense_variant	ENSG00000182185	ENST00000487270.1:c.767C>T	ENSP00000419471.1:p.Thr256Met	deleterious(0)	probably_damaging(0.996)	34	3e-05	5.24769e-05	0	1	1	0	0	0	0	1
chr14	68758628	C	G	RAD51B	rs376183330	missense_variant	ENSG00000182185	ENST00000487270.1:c.784C>G	ENSP00000419471.1:p.His262Asp	deleterious(0.01)	benign(0.029)	24.1	3e-05	5.24769e-05	0	1	1	0	0	0	0	1
chr14	68934928	T	C	RAD51B	rs375885782	missense_variant	ENSG00000182185	ENST00000487270.1:c.997T>C	ENSP00000419471.1:p.Phe333Leu	tolerated(0.15)	benign(0.068)	21	3e-05	5.24769e-05	0	1	1	0	0	0	0	0
chr16	52484344	T	G	TOX3	rs371471795	missense_variant	ENSG00000103460	ENST00000219746.9:c.523A>C	ENSP00000219746.9:p.Thr175Pro	deleterious(0.02)	probably_damaging(0.941)	23.4	3e-05	5.24769e-05	0	1	1	0	0	0	0	4
chr16	52484374	G	A	TOX3	rs752653368	missense_variant	ENSG00000103460	ENST00000219746.9:c.493C>T	ENSP00000219746.9:p.Arg165Cys	deleterious(0.01)	possibly_damaging(0.543)	27.2	3e-05	5.24769e-05	0	0	0	0	0	1	1	4
chr16	52498028	C	A	TOX3	rs755560023	missense_variant	ENSG00000103460	ENST00000219746.9:c.226G>T	ENSP00000219746.9:p.Asp76Tyr	deleterious(0)	probably_damaging(0.997)	28.2	3e-05	5.24769e-05	0	1	1	0	0	0	0	1
chr16	53859837	A	G	FTO	rs550932456	missense_variant	ENSG00000140718	ENST00000471389.1:c.185A>G	ENSP00000418823.1:p.His62Arg	deleterious(0.02)	probably_damaging(0.978)	25	3e-05	5.24769e-05	0	1	1	0	0	0	0	0
chr16	53860047	T	C	FTO	rs141423836	missense_variant	ENSG00000140718	ENST00000471389.1:c.395T>C	ENSP00000418823.1:p.Ile132Thr	deleterious(0.01)	possibly_damaging(0.486)	23.4	3e-05	5.24769e-05	0	1	1	0	0	0	0	0
chr16	53967979	C	T	FTO	rs558995583	missense_variant	ENSG00000140718	ENST00000471389.1:c.1322C>T	ENSP00000418823.1:p.Ser441Leu	tolerated(0.64)	benign(0.002)	11.72	3e-05	5.24769e-05	0	1	1	0	0	0	0	0
chr16	80654729	T	C	CDYL2	rs779145359	missense_variant	ENSG00000166446	ENST00000570137.2:c.938A>G	ENSP00000476295.1:p.Tyr313Cys	deleterious(0)	probably_damaging(0.956)	26.1	3e-05	5.24769e-05	0	1	1	0	0	0	0	0
chr16	80666968	G	A	CDYL2	rs778603352,COSM1380020	missense_variant	ENSG00000166446	ENST00000570137.2:c.782C>T	ENSP00000476295.1:p.Thr261Met	deleterious(0)	probably_damaging(1)	31	3e-05	5.24769e-05	0	1	1	0	0	0	0	0
chr16	80718502	A	T	CDYL2	rs373304541	missense_variant	ENSG00000166446	ENST00000570137.2:c.549T>A	ENSP00000476295.1:p.Asp183Glu	tolerated(0.96)	benign(0)	0.002	3e-05	5.24769e-05	0	1	1	0	0	0	0	0
chr16	80718734	C	T	CDYL2	rs754159227	missense_variant	ENSG00000166446	ENST00000570137.2:c.317G>A	ENSP00000476295.1:p.Arg106Gln	tolerated(0.2)	benign(0.226)	23	3e-05	5.24769e-05	0	1	1	0	0	0	0	5
chr2	174228032	T	C	CDCA7	rs754028322	missense_variant	ENSG00000144354	ENST00000306721.3:c.463T>C	ENSP00000306968.3:p.Phe155Leu	deleterious(0.02)	possibly_damaging(0.885)	33	3e-05	5.24769e-05	0	1	1	0	0	0	0	0
chr2	174229617	G	A	CDCA7	rs368968744	missense_variant	ENSG00000144354	ENST00000306721.3:c.794G>A	ENSP00000306968.3:p.Arg265Gln	tolerated(0.37)	benign(0.009)	23.4	3e-05	5.24769e-05	0	1	1	0	0	0	0	0
chr2	174229704	A	T	CDCA7	rs138353896,COSM3682471	missense_variant	ENSG00000144354	ENST00000306721.3:c.881A>T	ENSP00000306968.3:p.Asp294Val	deleterious(0.04)	benign(0.018)	9.566	3e-05	5.24769e-05	0	1	1	0	0	0	0	0
chr2	174231159	C	T	CDCA7	rs143579439	missense_variant	ENSG00000144354	ENST00000306721.3:c.1184C>T	ENSP00000306968.3:p.Pro395Leu	deleterious(0)	possibly_damaging(0.704)	35	3e-05	5.24769e-05	0	0	0	0	0	1	1	0
chr2	202151186	G	A	CASP8	rs746684914	missense_variant	ENSG00000064012	ENST00000358485.4:c.1486G>A	ENSP00000351273.4:p.Asp496Asn	deleterious(0.03)	benign(0.059)	24.6	3e-05	5.24769e-05	0	1	1	0	0	0	0	0
chr22	40813379	T	C	MKL1	rs555146744	missense_variant	ENSG00000196588	ENST00000355630.3:c.2183A>G	ENSP00000347847.3:p.Tyr728Cys	deleterious(0.01)	probably_damaging(0.993)	28	3e-05	5.24769e-05	0	1	1	0	0	0	0	0
chr22	40814541	G	A	MKL1	rs747320600	missense_variant	ENSG00000196588	ENST00000355630.3:c.1901C>T	ENSP00000347847.3:p.Pro634Leu	tolerated(0.13)	benign(0.001)	8.349	3e-05	5.24769e-05	0	1	1	0	0	0	0	0
chr22	40814770	C	T	MKL1	rs779496339	missense_variant	ENSG00000196588	ENST00000355630.3:c.1672G>A	ENSP00000347847.3:p.Glu558Lys	deleterious(0)	probably_damaging(0.952)	32	3e-05	5.24769e-05	0	1	1	0	0	0	0	2
chr22	40814839	C	G	MKL1	rs751069863	missense_variant	ENSG00000196588	ENST00000355630.3:c.1603G>C	ENSP00000347847.3:p.Glu535Gln	deleterious(0.01)	probably_damaging(0.983)	25.8	3e-05	5.24769e-05	0	0	0	0	0	1	1	2
chr22	40815085	C	T	MKL1	rs543904613	missense_variant	ENSG00000196588	ENST00000355630.3:c.1357G>A	ENSP00000347847.3:p.Val453Met	deleterious(0.03)	probably_damaging(0.987)	24.3	3e-05	5.24769e-05	0	1	1	0	0	0	0	1
chr22	40815153	T	G	MKL1	rs755592193	missense_variant	ENSG00000196588	ENST00000355630.3:c.1289A>C	ENSP00000347847.3:p.Glu430Ala	tolerated(0.08)	benign(0.049)	18.53	3e-05	5.24769e-05	0	1	1	0	0	0	0	1
chr22	40816521	G	T	MKL1	rs773732518	missense_variant	ENSG00000196588	ENST00000355630.3:c.941C>A	ENSP00000347847.3:p.Thr314Asn	tolerated(0.26)	benign(0.001)	0.019	3e-05	5.24769e-05	0	1	1	0	0	0	0	0
chr22	40816536	C	T	MKL1	rs545597621	missense_variant	ENSG00000196588	ENST00000355630.3:c.926G>A	ENSP00000347847.3:p.Arg309His	deleterious(0.02)	probably_damaging(0.984)	25.1	3e-05	5.24769e-05	0	1	1	0	0	0	0	0
chr22	40820256	C	T	MKL1	rs531815758	missense_variant	ENSG00000196588	ENST00000355630.3:c.431G>A	ENSP00000347847.3:p.Arg144Gln	deleterious(0.02)	benign(0.08)	24.1	3e-05	5.24769e-05	0	1	1	0	0	0	0	0
chr22	40820274	G	A	MKL1	rs376132104	missense_variant	ENSG00000196588	ENST00000355630.3:c.413C>T	ENSP00000347847.3:p.Pro138Leu	tolerated(0.1)	probably_damaging(0.992)	26.9	3e-05	5.24769e-05	0	1	1	0	0	0	0	0
chr22	40820341	C	T	MKL1	rs779073393,COSM727054	missense_variant	ENSG00000196588	ENST00000355630.3:c.346G>A	ENSP00000347847.3:p.Asp116Asn	deleterious(0)	probably_damaging(0.981)	35	3e-05	5.24769e-05	0	0	0	0	0	1	1	4
chr22	40825765	G	A	MKL1	rs199952280	missense_variant	ENSG00000196588	ENST00000355630.3:c.146C>T	ENSP00000347847.3:p.Ser49Leu	tolerated(0.59)	probably_damaging(0.986)	24.7	3e-05	5.24769e-05	0	1	1	0	0	0	0	4
chr3	30691901	A	G	TGFBR2	rs377455599	missense_variant	ENSG00000163513	ENST00000359013.4:c.478A>G	ENSP00000351905.4:p.Met160Val	tolerated(0.58)	benign(0.008)	9.603	3e-05	5.24769e-05	0	0	0	0	0	1	1	0
chr3	30713292	C	T	TGFBR2	rs150022335	missense_variant	ENSG00000163513	ENST00000359013.4:c.692C>T	ENSP00000351905.4:p.Thr231Met	tolerated(0.07)	benign(0.014)	9.17	3e-05	5.24769e-05	0	0	0	0	0	1	1	0
chr3	30713828	A	G	TGFBR2	rs137908708	missense_variant	ENSG00000163513	ENST00000359013.4:c.1228A>G	ENSP00000351905.4:p.Ile410Val	tolerated(0.51)	possibly_damaging(0.735)	21.8	3e-05	5.24769e-05	0	1	1	0	0	0	0	0
chr3	46937249	G	A	PTH1R	rs199821001	missense_variant	ENSG00000160801	ENST00000313049.5:c.203G>A	ENSP00000321999.4:p.Gly68Glu	tolerated(0.09)	benign(0.015)	11.41	3e-05	5.24769e-05	0	1	1	0	0	0	0	1
chr3	46943326	G	A	PTH1R	rs779171349	missense_variant	ENSG00000160801	ENST00000313049.5:c.1187G>A	ENSP00000321999.4:p.Arg396Gln	tolerated(0.12)	probably_damaging(0.96)	26.1	3e-05	5.24769e-05	0	1	1	0	0	0	0	4
chr3	46943337	C	T	PTH1R	rs775797881	missense_variant	ENSG00000160801	ENST00000313049.5:c.1198C>T	ENSP00000321999.4:p.Arg400Trp	deleterious(0)	probably_damaging(0.988)	29.7	3e-05	5.24769e-05	0	1	1	0	0	0	0	4
chr3	46943350	G	A	PTH1R	rs200410967	missense_variant	ENSG00000160801	ENST00000313049.5:c.1211G>A	ENSP00000321999.4:p.Arg404Gln	deleterious(0.02)	probably_damaging(0.99)	34	3e-05	5.24769e-05	0	1	1	0	0	0	0	4
chr3	46944033	C	T	PTH1R	CM041825,rs121434602	missense_variant	ENSG00000160801	ENST00000313049.5:c.1229C>T	ENSP00000321999.4:p.Thr410Met	deleterious(0)	probably_damaging(1)	34	3e-05	5.24769e-05	0	0	0	0	0	1	1	0
chr3	46944060	T	C	PTH1R	rs780040505	missense_variant	ENSG00000160801	ENST00000313049.5:c.1256T>C	ENSP00000321999.4:p.Val419Ala	deleterious(0)	probably_damaging(0.999)	26.6	3e-05	5.24769e-05	0	1	1	0	0	0	0	0
chr3	46944832	G	A	PTH1R	rs773660422	missense_variant	ENSG00000160801	ENST00000313049.5:c.1468G>A	ENSP00000321999.4:p.Gly490Arg	deleterious(0.01)	possibly_damaging(0.632)	29.2	3e-05	5.24769e-05	0	0	0	0	0	1	1	0
chr3	46945007	T	C	PTH1R	rs370920541	missense_variant	ENSG00000160801	ENST00000313049.5:c.1643T>C	ENSP00000321999.4:p.Leu548Pro	tolerated(0.06)	benign(0.44)	20.7	3e-05	5.24769e-05	0	0	0	0	0	1	1	0
[truncated: 2,952 more rows]

## Sheet: TableS5
Table S5. Risks associated with the aggregate of truncating variants in the BC GWAS genes.
	Case			Control
[truncated: 39 more rows]

## Sheet: TableS6
Table S6. Risk estimates for BC GWAS genes split by the variant severity effect prediction algorithms CADD, PolyPhen, SIFT, and AlignGVGD. CADD provides a PHRED-scaled score such that variants with a CADD score >20 are predicted to have a greater impact than 99% of all other possible substitutions genome wide. PolyPhen2 provides three effect prediction categories, and for this analysis, “probably…
[truncated: 117 more rows]

[truncated: 1 more sheets: TableS7]
